# Supplementary material for: Comparative Genomics of the Transport Proteins of Ten Lactobacillus Strains
Source: Genes (Basel). 2020 Oct 21;11(10):1234. doi: 10.3390/genes11101234 (PMC7593918; doi:10.3390/genes11101234)
Supplement: Supplementary file 1 [file genes-11-01234-s001.xlsx]

## Sheet: Acidophilus
Query ID	Hit ID	Hit TCID	Hit Description	Match Len	e-Val	% Identity	Query Length	Hit Length	Query Coverage	Hit Coverage	Query TMS#	Hit TMS#	TM-Overlap Score	Family Abrv.	Predicted Substrate
AAV42263.1	Q8Y5K1	1.A.1.17.2	gnl|BL_ORD_ID|15129 gnl|TC-DB|Q8Y5K1|1.A.1.17.2 Lmo2059 protein OS=Listeria monocytogenes GN=lmo2059 PE=4 SV=1	250	1.7528e-19	24	271	247	86.3	96.4	6	6	5.55	VIC	K+
AAV43261.1	D7V7W8	1.A.8.2.5	gnl|BL_ORD_ID|3103 gnl|TC-DB|D7V7W8|1.A.8.2.5 MIP family glycerol uptake facilitator protein GlpF OS=Lactobacillus plantarum subsp. plantarum ATCC 14917 GN=glpF2 PE=3 SV=1	231	8.60344e-129	73	235	235	97.9	97.9	6	6	5.35	MIP	water, Dihydroxyacetone, glycerol
AAV43411.1	D7VEY8	1.A.8.2.7	gnl|BL_ORD_ID|3106 gnl|TC-DB|D7VEY8|1.A.8.2.7 MIP family glycerol uptake facilitator protein GlpF OS=Lactobacillus plantarum subsp. plantarum ATCC 14917 GN=glpF4 PE=3 SV=1	250	9.20908e-122	64	250	250	99.6	99.6	6	6	5.55	MIP	water, Dihydroxyacetone, glycerol
AAV42358.1	O66515	1.A.11.1.5	gnl|BL_ORD_ID|6429 gnl|TC-DB|O66515|1.A.11.1.5 Ammonia channel OS=Aquifex aeolicus (strain VF5) GN=amt PE=1 SV=1	403	2.13952e-104	44	416	423	96.4	92.4	11	12	10.35	Amt	ammonia
AAV42416.1	A3CPR5	1.A.14.2.6	gnl|BL_ORD_ID|391 gnl|TC-DB|A3CPR5|1.A.14.2.6 Integral membrane protein, possible receptor, putative OS=Streptococcus sanguinis (strain SK36) GN=SSA_1788 PE=4 SV=1	74	2.5627e-18	53	81	227	90.1	31.7	2	7	1.95	CaTA	Unknown
AAV42417.1	A3CPR5	1.A.14.2.6	gnl|BL_ORD_ID|391 gnl|TC-DB|A3CPR5|1.A.14.2.6 Integral membrane protein, possible receptor, putative OS=Streptococcus sanguinis (strain SK36) GN=SSA_1788 PE=4 SV=1	128	3.94473e-14	29	188	227	66	55.9	5	7	3.35	CaTA	Unknown
AAV42314.1	B1MZU9	1.A.22.1.8	gnl|BL_ORD_ID|1485 gnl|TC-DB|B1MZU9|1.A.22.1.8 Large-conductance mechanosensitive channel OS=Leuconostoc citreum (strain KM20) GN=mscL PE=3 SV=1	124	2.01642e-39	56	124	126	97.6	97.6	2	2	1.4	MscL	ions
AAV43452.1	A3CLT2	1.A.35.3.4	gnl|BL_ORD_ID|390 gnl|TC-DB|A3CLT2|1.A.35.3.4 Cation transporter CorA family, putative OS=Streptococcus sanguinis (strain SK36) GN=SSA_0701 PE=4 SV=1	298	1.32275e-39	28	319	302	91.2	95.7	2	3	1.5	MIT	Mg2+
AAV42842.1	O07591	1.A.43.1.2	gnl|BL_ORD_ID|5835 gnl|TC-DB|O07591|1.A.43.1.2 Protein CrcB homolog 2 OS=Bacillus subtilis (strain 168) GN=crcB2 PE=3 SV=1	105	2.59684e-12	33	129	131	80.6	77.9	4	4	3.7	Fluc	Camphor, Fl-
AAV42843.1	F6CB17	1.A.43.1.14	gnl|BL_ORD_ID|3899 gnl|TC-DB|F6CB17|1.A.43.1.14 Putative fluoride ion transporter CrcB OS=Lactobacillus kefiranofaciens (strain ZW3) GN=crcB PE=3 SV=1	120	3.46157e-72	81	124	124	96	96	4	4	3.7	Fluc	Fl-
AAV42491.1	T1Y8N2	1.A.112.2.10	gnl|BL_ORD_ID|17867 gnl|TC-DB|T1Y8N2|1.A.112.2.10 Magnesium and cobalt efflux protein corC OS=Staphylococcus aureus subsp. aureus CN1 OX=1193576 GN=SAKOR_00699 PE=4 SV=1	428	1.07056e-76	32	450	449	94.7	93.5	4	4	3.2	CNNM	None
AAV43601.1	O54454	1.C.30.1.3	gnl|BL_ORD_ID|6332 gnl|TC-DB|O54454|1.C.30.1.3 AMPHIPATHIC PORE-FORMING PEPTIDE PRECURSOR - Streptococcus thermophilus.	72	2.20993e-07	43	83	85	85.5	80	1	1	0.85	Plantaricin JK	small molecules, electrolytes, water
AAV42070.1	B1Z6U1	1.C.75.1.7	gnl|BL_ORD_ID|1524 gnl|TC-DB|B1Z6U1|1.C.75.1.7 Filamentous haemagglutinin family outer membrane protein OS=Burkholderia ambifaria (strain MC40-6) GN=BamMC406_6766 PE=4 SV=1	366	2.20212e-09	25	444	2818	78.4	11.2	1	1	0	B-PFT	small molecules
AAV43406.1	E3DLQ2	1.C.105.2.9	gnl|BL_ORD_ID|3309 gnl|TC-DB|E3DLQ2|1.C.105.2.9 Putative uncharacterized protein OS=Halanaerobium praevalens (strain ATCC 33744 / DSM 2228 / GSL) GN=Hprae_1098 PE=4 SV=1	886	3.5359e-30	22	832	872	98.2	96.3	2	2	0.85	Vip3	small molecules
AAV42825.1	P54176	1.C.113.1.1	gnl|BL_ORD_ID|9577 gnl|TC-DB|P54176|1.C.113.1.1 HEMOLYSIN III (HLY-III) - Bacillus cereus.	204	3.43667e-66	47	221	219	91.9	92.7	7	7	6.45	Hly III	small molecules
AAV42731.1	J8Z3M3	1.E.43.1.9	gnl|BL_ORD_ID|4942 gnl|TC-DB|J8Z3M3|1.E.43.1.9 Uncharacterized protein OS=Bacillus cereus HD73 PE=4 SV=1	73	5.76123e-23	52	86	82	83.7	87.8	3	3	2.6	T-A Hol	endolysin
AAV42448.1	P25744	2.A.1.2.20	gnl|BL_ORD_ID|8291 gnl|TC-DB|P25744|2.A.1.2.20 Hypothetical transport protein yceE - Escherichia coli.	380	1.49781e-126	48	401	408	94.5	92.6	12	12	11.75	MFS	fosfomycin, Fluoroquinolones
AAV42065.1	O34546	2.A.1.2.69	gnl|BL_ORD_ID|6138 gnl|TC-DB|O34546|2.A.1.2.69 Uncharacterized MFS-type transporter yttB OS=Bacillus subtilis (strain 168) GN=yttB PE=3 SV=1	391	6.79006e-67	31	405	397	95.1	94.5	12	12	10.1	MFS	Unknown, NONE
AAV43313.1	O35018	2.A.1.3.30	gnl|BL_ORD_ID|6173 gnl|TC-DB|O35018|2.A.1.3.30 Lincomycin resistance protein lmrB - Bacillus subtilis.	454	1.33619e-128	44	469	479	94.2	94.6	14	14	13.35	MFS	None
AAV42621.1	O35018	2.A.1.3.30	gnl|BL_ORD_ID|6173 gnl|TC-DB|O35018|2.A.1.3.30 Lincomycin resistance protein lmrB - Bacillus subtilis.	461	8.58058e-81	34	462	479	96.3	95.4	14	14	12.65	MFS	None
AAV43435.1	O32182	2.A.1.3.33	gnl|BL_ORD_ID|6098 gnl|TC-DB|O32182|2.A.1.3.33 Uncharacterized MFS-type transporter yusP OS=Bacillus subtilis GN=yusP PE=3 SV=1	515	2.39389e-87	33	485	541	99.6	94.6	14	14	11.45	MFS	Novobiocin, Streptomycin, Actinomycin D
AAV42433.1	P96712	2.A.1.3.50	gnl|BL_ORD_ID|10349 gnl|TC-DB|P96712|2.A.1.3.50 Multidrug resistance protein 3 OS=Bacillus subtilis (strain 168) GN=bmr3 PE=1 SV=1	481	2.44271e-68	33	488	512	95.1	93.2	14	14	11.05	MFS	drugs
AAV42447.1	P96712	2.A.1.3.50	gnl|BL_ORD_ID|10349 gnl|TC-DB|P96712|2.A.1.3.50 Multidrug resistance protein 3 OS=Bacillus subtilis (strain 168) GN=bmr3 PE=1 SV=1	485	3.90746e-63	27	471	512	99.8	94.1	13	14	10.2	MFS	drugs
AAV43270.1	I7QYF9	2.A.1.3.75	gnl|BL_ORD_ID|4875 gnl|TC-DB|I7QYF9|2.A.1.3.75 Major facilitator superfamily protein OS=Streptococcus canis FSL Z3-227 GN=SCAZ3_10115 PE=3 SV=1	488	1.2728e-155	47	490	499	97.1	97.6	14	14	9.15	MFS	None
AAV42899.1	P76628	2.A.1.36.3	gnl|BL_ORD_ID|10086 gnl|TC-DB|P76628|2.A.1.36.3 Putative uncharacterized transporter ygaY OS=Escherichia coli (strain K12) GN=ygaY PE=5 SV=2	379	1.94176e-62	31	397	394	94.5	94.7	12	12	10.95	MFS	Unknown
AAV43254.1	C2UR80	2.A.1.46.5	gnl|BL_ORD_ID|2190 gnl|TC-DB|C2UR80|2.A.1.46.5 Quinolone resistence protein, major facilitator family transporter OS=Bacillus cereus Rock3-28 GN=bcere0019_7170 PE=4 SV=1	389	2.26507e-35	24	392	407	98.5	94.6	12	12	10.35	MFS	Quinolone
AAV42976.1	WP_087702834	2.A.1.62.4	gnl|BL_ORD_ID|18822 gnl|TC-DB|WP_087702834.1|2.A.1.62.4 MFS transporter [Clostridium diolis]	406	2.45841e-21	24	405	406	97	97.8	12	12	11.35	MFS	None
AAV43291.1	Q04DP6	2.A.1.68.1	gnl|BL_ORD_ID|10684 gnl|TC-DB|Q04DP6|2.A.1.68.1 Permease of the major facilitator superfamily OS=Oenococcus oeni (strain BAA-331 / PSU-1) GN=OEOE_1574 PE=4 SV=1	385	4.60573e-57	29	407	403	94.1	94.3	12	12	12.3	MFS	glucose
AAV43284.1	P43466	2.A.2.2.2	gnl|BL_ORD_ID|9196 gnl|TC-DB|P43466|2.A.2.2.2 RAFFINOSE CARRIER PROTEIN (RAFFINOSE PERMEASE) - Pediococcus pentosaceus.	596	9.66773e-136	37	639	641	92.2	92.2	13	13	11.45	GPH	Raffinose
AAV41949.1	Q8EEC4	2.A.2.6.3	gnl|BL_ORD_ID|14306 gnl|TC-DB|Q8EEC4|2.A.2.6.3 Transporter, putative OS=Shewanella oneidensis GN=SO_2458 PE=4 SV=1	507	8.21574e-51	27	450	529	95.8	93.6	12	13	8	GPH	Maltose
AAV43702.1	P27837	2.A.3.1.15	gnl|BL_ORD_ID|8347 gnl|TC-DB|P27837|2.A.3.1.15 Probable transport protein YifK OS=Escherichia coli (strain K12) GN=yifK PE=1 SV=4	451	8.95746e-171	52	457	461	98.5	96.7	12	12	11.35	APC	Unknown
AAV42757.1	P27837	2.A.3.1.15	gnl|BL_ORD_ID|8347 gnl|TC-DB|P27837|2.A.3.1.15 Probable transport protein YifK OS=Escherichia coli (strain K12) GN=yifK PE=1 SV=4	446	1.37774e-166	52	463	461	96.1	95.7	12	12	9.7	APC	Unknown
AAV43703.1	P96704	2.A.3.1.16	gnl|BL_ORD_ID|10347 gnl|TC-DB|P96704|2.A.3.1.16 Uncharacterized transporter YdgF OS=Bacillus subtilis (strain 168) GN=ydgF PE=3 SV=1	442	1.95914e-174	52	449	458	97.8	96.1	12	12	9.95	APC	Unknown
AAV42347.1	P96704	2.A.3.1.16	gnl|BL_ORD_ID|10347 gnl|TC-DB|P96704|2.A.3.1.16 Uncharacterized transporter YdgF OS=Bacillus subtilis (strain 168) GN=ydgF PE=3 SV=1	448	3.30189e-142	42	457	458	97.6	97.2	12	12	10.05	APC	Unknown
AAV42796.1	Q8R706	2.A.3.3.22	gnl|BL_ORD_ID|14809 gnl|TC-DB|Q8R706|2.A.3.3.22 Amino acid transporters OS=Caldanaerobacter subterraneus subsp. tengcongensis (strain DSM 15242 / JCM 11007 / NBRC 100824 / MB4) GN=PotE6 PE=4 SV=1	397	1.18125e-114	43	398	475	99	83.4	11	13	8.95	APC	Amino acids
AAV42959.1	Q8R706	2.A.3.3.22	gnl|BL_ORD_ID|14809 gnl|TC-DB|Q8R706|2.A.3.3.22 Amino acid transporters OS=Caldanaerobacter subterraneus subsp. tengcongensis (strain DSM 15242 / JCM 11007 / NBRC 100824 / MB4) GN=PotE6 PE=4 SV=1	457	1.08727e-29	25	456	475	94.5	92.8	12	13	8.3	APC	Amino acids
AAV43122.1	s6ex81	2.A.3.3.23	gnl|BL_ORD_ID|17737 gnl|TC-DB|s6ex81|2.A.3.3.23 Branched-chain amino acid permease OS=Lactococcus lactis subsp. lactis A12 GN=bcaP PE=4 SV=1	467	0	62	475	469	98.1	98.9	14	12	10.3	APC	Leucine, Isoleucine, Valine
AAV41961.1	O30417	2.A.3.7.1	gnl|BL_ORD_ID|6025 gnl|TC-DB|O30417|2.A.3.7.1 AMINO ACID ANTIPORTER GADC (ORFX) - Lactococcus lactis (subsp. lactis) (Streptococcus lactis).	463	7.73297e-108	35	480	503	96	91.7	12	12	11.7	APC	Gamma-aminobutyrate, glutamate
AAV42571.1	P75835	2.A.3.7.2	gnl|BL_ORD_ID|10025 gnl|TC-DB|P75835|2.A.3.7.2 Inner membrane transporter ycaM OS=Escherichia coli (strain K12) GN=ycaM PE=1 SV=2	466	3.1001e-142	45	478	476	95.6	96.4	12	12	10.9	APC	glutamate, Gamma-aminobutyric acid
AAV42599.1	P75835	2.A.3.7.2	gnl|BL_ORD_ID|10025 gnl|TC-DB|P75835|2.A.3.7.2 Inner membrane transporter ycaM OS=Escherichia coli (strain K12) GN=ycaM PE=1 SV=2	466	1.92362e-121	38	541	476	85.8	97.5	14	12	10.4	APC	glutamate, Gamma-aminobutyric acid
AAV43249.1	P39282	2.A.3.7.5	gnl|BL_ORD_ID|8937 gnl|TC-DB|P39282|2.A.3.7.5 Inner membrane transporter yjeM OS=Escherichia coli (strain K12) GN=yjeM PE=1 SV=2	481	9.19086e-145	43	498	500	96.2	95.4	12	12	10.75	APC	Unknown
AAV42845.1	F2HJG8	2.A.3.7.6	gnl|BL_ORD_ID|3746 gnl|TC-DB|F2HJG8|2.A.3.7.6 YlcA protein OS=Lactococcus lactis subsp. lactis (strain CV56) GN=ylcA PE=4 SV=1	471	1.72721e-114	37	490	488	95.1	95.9	12	12	10.05	APC	aspartate, glutamate
AAV42930.1	O34739	2.A.3.8.12	gnl|BL_ORD_ID|6148 gnl|TC-DB|O34739|2.A.3.8.12 YkbA protein - Bacillus subtilis.	439	6.90396e-148	50	441	438	98.2	98.9	12	12	10.3	APC	Serine, Threonine, tyrosine, tryptophan, phenylalanine, Histidine
AAV42494.1	O34739	2.A.3.8.12	gnl|BL_ORD_ID|6148 gnl|TC-DB|O34739|2.A.3.8.12 YkbA protein - Bacillus subtilis.	433	2.15452e-107	40	434	438	99.1	97.5	12	12	10.65	APC	Serine, Threonine, tyrosine, tryptophan, phenylalanine, Histidine
AAV42155.1	O07002	2.A.3.11.1	gnl|BL_ORD_ID|5816 gnl|TC-DB|O07002|2.A.3.11.1 Hypothetical protein yvea - Bacillus subtilis.	514	3.79038e-105	34	530	520	95.8	96.5	14	14	9.5	APC	aspartate, glutamate, L-aspartate hydroxamate
AAV42232.1	O07084	2.A.4.1.3	gnl|BL_ORD_ID|5820 gnl|TC-DB|O07084|2.A.4.1.3 Cation transport protein YRDO - Bacillus subtilis.	273	7.01751e-59	37	299	311	90	87.1	5	5	4.6	CDF	Cd2+, Zn2+, H+, K+
AAV43686.1	P96661	2.A.7.3.31	gnl|BL_ORD_ID|10344 gnl|TC-DB|P96661|2.A.7.3.31 Uncharacterized transporter ydeD OS=Bacillus subtilis (strain 168) GN=ydeD PE=3 SV=1	302	4.61566e-52	30	300	319	99.3	94.4	10	10	8.55	DMT	Unknown
AAV43685.1	KRN20350	2.A.7.3.79	gnl|BL_ORD_ID|5289 gnl|TC-DB|KRN20350.1|2.A.7.3.79 DMT family permease [Lactobacillus similis DSM 23365 = JCM 2765]	298	3.54102e-77	45	309	313	94.8	94.2	10	10	8.95	DMT	None
AAV43684.1	KRN20350	2.A.7.3.79	gnl|BL_ORD_ID|5289 gnl|TC-DB|KRN20350.1|2.A.7.3.79 DMT family permease [Lactobacillus similis DSM 23365 = JCM 2765]	293	1.67313e-71	41	306	313	93.8	91.7	10	10	9.1	DMT	None
AAV42946.1	L8DP77	2.A.7.5.5	gnl|BL_ORD_ID|5410 gnl|TC-DB|L8DP77|2.A.7.5.5 Glucose transporter GlcU OS=Listeria monocytogenes GN=BN418_0174 PE=4 SV=1	282	2.71002e-70	40	280	285	99.6	97.5	10	10	8.65	DMT	glucose
AAV43201.1	L8DP77	2.A.7.5.5	gnl|BL_ORD_ID|5410 gnl|TC-DB|L8DP77|2.A.7.5.5 Glucose transporter GlcU OS=Listeria monocytogenes GN=BN418_0174 PE=4 SV=1	286	9.09212e-62	37	287	285	99.3	98.6	10	10	8.5	DMT	glucose
AAV43770.1	Q01625	2.A.9.3.2	gnl|BL_ORD_ID|10517 gnl|TC-DB|Q01625|2.A.9.3.2 Stage III sporulation protein J precursor - Bacillus subtilis.	255	1.37374e-67	40	291	261	87.3	93.5	6	6	4.2	YidC/Alb3/Oxa1	proteins
AAV43342.1	Q9KDP2	2.A.9.3.6	gnl|BL_ORD_ID|16288 gnl|TC-DB|Q9KDP2|2.A.9.3.6 Membrane protein insertase YidC 2 OS=Bacillus halodurans (strain ATCC BAA-125 / DSM 18197 / FERM 7344 / JCM 9153 / C-125) GN=yidC2 PE=1 SV=1	300	1.76905e-30	30	322	280	87.6	95.4	6	6	3.1	YidC/Alb3/Oxa1	proteins
AAV43576.1	Q46839	2.A.14.1.2	gnl|BL_ORD_ID|12069 gnl|TC-DB|Q46839|2.A.14.1.2 PUTATIVE L-LACTATE PERMEASE - Escherichia coli.	542	3.72654e-86	33	504	560	98.6	96.1	16	18	12	LctP	Lactate, Glycolate
AAV43650.1	Q5M4H8	2.A.17.1.6	gnl|BL_ORD_ID|12763 gnl|TC-DB|Q5M4H8|2.A.17.1.6 Di-or tripeptide:H+ symporter OS=Streptococcus thermophilus (strain ATCC BAA-250 / LMG 18311) GN=dtpT PE=3 SV=1	493	0	57	497	483	98.8	99.2	13	14	8.85	POT/PTR	dipeptides, tripeptides
AAV42884.1	F2HK99	2.A.26.1.9	gnl|BL_ORD_ID|3747 gnl|TC-DB|F2HK99|2.A.26.1.9 BrnQ protein OS=Lactococcus lactis subsp. lactis (strain CV56) GN=brnQ PE=4 SV=1	437	4.88546e-133	44	456	456	95.4	95.6	12	12	10.55	LIVCS	Branched amino acids
AAV42419.1	Q838N7	2.A.35.1.3	gnl|BL_ORD_ID|14005 gnl|TC-DB|Q838N7|2.A.35.1.3 Na+/H+ antiporter - Enterococcus faecalis (Streptococcus faecalis).	452	0	56	458	467	98.3	96.6	14	13	11.8	NhaC	tyrosine
AAV43727.1	P26235	2.A.37.2.1	gnl|BL_ORD_ID|8304 gnl|TC-DB|P26235|2.A.37.2.1 NA(+)/H(+) ANTIPORTER - Enterococcus hirae.	383	9.63909e-121	49	389	383	97.7	98.7	13	13	11.15	CPA2	Na+, H+
AAV42849.1	P43440	2.A.38.4.1	gnl|BL_ORD_ID|9192 gnl|TC-DB|P43440|2.A.38.4.1 V-TYPE SODIUM ATP SYNTHASE SUBUNIT J (EC 3.6.1.34) (NA(+)- TRANSLOCATING ATPASE SUBUNIT J) - Enterococcus hirae.	443	5.15026e-134	46	446	451	98.4	97.8	12	8	7.6	Trk	K+, Na+
AAV42443.1	Q9CF78	2.A.40.1.2	gnl|BL_ORD_ID|15850 gnl|TC-DB|Q9CF78|2.A.40.1.2 Uracil permease - Lactococcus lactis (subsp. lactis) (Streptococcus lactis).	421	1.86663e-176	59	444	430	92.1	97.7	12	13	8.85	NAT/NCS2	Uracil
AAV42134.1	P42086	2.A.40.3.1	gnl|BL_ORD_ID|9118 gnl|TC-DB|P42086|2.A.40.3.1 XANTHINE PERMEASE - Bacillus subtilis.	412	2.6457e-161	54	426	438	96.5	93.6	12	13	9.95	NAT/NCS2	Xanthine
AAV43747.1	O34987	2.A.40.7.2	gnl|BL_ORD_ID|6167 gnl|TC-DB|O34987|2.A.40.7.2 Hypoxanthine/guanine permease (Hypothetical protein) - Bacillus subtilis.	435	1.58298e-165	55	435	440	97.7	98.6	12	12	7.75	NAT/NCS2	Hypoxanthine, Guanosine
AAV43750.1	O34987	2.A.40.7.2	gnl|BL_ORD_ID|6167 gnl|TC-DB|O34987|2.A.40.7.2 Hypoxanthine/guanine permease (Hypothetical protein) - Bacillus subtilis.	413	8.56553e-156	53	418	440	96.4	93.6	11	12	7.4	NAT/NCS2	Hypoxanthine, Guanosine
AAV41999.1	K4IPL7	2.A.45.2.6	gnl|BL_ORD_ID|5054 gnl|TC-DB|K4IPL7|2.A.45.2.6 Transporter, probably The plasma membrane silicon (Silicate) efflux pump, Low Silicon 2, Lsi2 OS=Bifidobacterium asteroides (strain PRL2011) GN=BAST_1180 PE=4 SV=1	392	2.06138e-40	29	368	393	98.4	97.7	10	12	7.2	ArsB	Silicon
AAV42769.1	Q41364	2.A.47.3.1	gnl|BL_ORD_ID|11962 gnl|TC-DB|Q41364|2.A.47.3.1 2-OXOGLUTARATE/MALATE TRANSLOCATOR PRECURSOR - Spinacia oleracea (Spinach).	482	1.45925e-121	38	488	569	98	81.5	12	14	8	DASS	2-oxoglutarate
AAV43765.1	P37019	2.A.49.5.1	gnl|BL_ORD_ID|8766 gnl|TC-DB|P37019|2.A.49.5.1 Voltage-gated ClC-type chloride channel eriC - Escherichia coli.	434	8.16005e-60	32	519	473	80.9	89.4	11	11	9.75	ClC	Cl-
AAV43215.1	A8ALD3	2.A.49.5.5	gnl|BL_ORD_ID|823 gnl|TC-DB|A8ALD3|2.A.49.5.5 H(+)/Cl(-) exchange transporter ClcA OS=Citrobacter koseri (strain ATCC BAA-895 / CDC 4225-83 / SGSC4696) GN=clcA PE=3 SV=1	432	2.82158e-46	29	448	473	92.9	87.1	11	11	9.55	ClC	Cl-
AAV43722.1	P39580	2.A.50.2.1	gnl|BL_ORD_ID|8965 gnl|TC-DB|P39580|2.A.50.2.1 Protein dltB - Bacillus subtilis.	403	4.53915e-120	48	412	395	95.6	98	10	12	6.6	GUP	Alanine
AAV43388.1	Q9KAX3	2.A.66.1.32	gnl|BL_ORD_ID|16281 gnl|TC-DB|Q9KAX3|2.A.66.1.32 BH2163 protein OS=Bacillus halodurans (strain ATCC BAA-125 / DSM 18197 / FERM 7344 / JCM 9153 / C-125) GN=BH2163 PE=4 SV=1	425	1.18493e-64	29	444	464	93.9	90.1	12	12	11.3	MOP	drugs, H+
AAV43714.1	Q00758	2.A.66.2.14	gnl|BL_ORD_ID|10487 gnl|TC-DB|Q00758|2.A.66.2.14 Stage V sporulation protein B OS=Bacillus subtilis GN=spoVB PE=2 SV=1	467	1.44317e-13	22	538	518	84	84.4	14	14	10.45	MOP	Lipid-linked oligosaccharides
AAV43536.1	Q8KUK6	2.A.66.2.16	gnl|BL_ORD_ID|14593 gnl|TC-DB|Q8KUK6|2.A.66.2.16 CpsU OS=Streptococcus thermophilus GN=cpsU PE=4 SV=1	470	2.42644e-163	50	477	471	98.3	99.6	14	14	11.7	MOP	Capsular polysaccharides
AAV42406.1	Q8KUK6	2.A.66.2.16	gnl|BL_ORD_ID|14593 gnl|TC-DB|Q8KUK6|2.A.66.2.16 CpsU OS=Streptococcus thermophilus GN=cpsU PE=4 SV=1	468	2.64233e-77	32	476	471	95.2	96.4	14	14	11.35	MOP	Capsular polysaccharides
AAV42449.1	Q48797	2.A.69.4.5	gnl|BL_ORD_ID|12135 gnl|TC-DB|Q48797|2.A.69.4.5 MALATE PERMEASE - Oenococcus oeni (Leuconostoc oenos).	312	9.07984e-19	23	312	314	96.8	98.1	10	10	9.05	AEC	malate
AAV42067.1	Q9CHU5	2.A.72.1.3	gnl|BL_ORD_ID|15851 gnl|TC-DB|Q9CHU5|2.A.72.1.3 Probable potassium transport system protein kup 1 OS=Lactococcus lactis subsp. lactis (strain IL1403) GN=kup1 PE=3 SV=1	614	0	51	616	670	99.4	90.6	12	11	8.95	KUP	K+
AAV42469.1	Q9CHU5	2.A.72.1.3	gnl|BL_ORD_ID|15851 gnl|TC-DB|Q9CHU5|2.A.72.1.3 Probable potassium transport system protein kup 1 OS=Lactococcus lactis subsp. lactis (strain IL1403) GN=kup1 PE=3 SV=1	645	0	53	671	670	95.8	95.4	13	11	9.8	KUP	K+
AAV41927.1	O05469	2.A.77.1.1	gnl|BL_ORD_ID|5779 gnl|TC-DB|O05469|2.A.77.1.1 CADD PROTEIN - Staphylococcus aureus.	202	2.03096e-83	57	215	209	93.5	95.7	6	6	5.2	CadD	Cd2+
AAV42783.1	G7U9U2	2.A.79.1.3	gnl|BL_ORD_ID|4354 gnl|TC-DB|G7U9U2|2.A.79.1.3 Putative uncharacterized protein OS=Propionibacterium acnes ATCC 11828 GN=TIIST44_11145 PE=4 SV=1	420	5.18021e-61	34	451	440	92	93.2	9	10	7.35	ThrE	Threonine
AAV43569.1	Q73PT4	2.A.79.1.5	gnl|BL_ORD_ID|13535 gnl|TC-DB|Q73PT4|2.A.79.1.5 Membrane protein, putative OS=Treponema denticola (strain ATCC 35405 / CIP 103919 / DSM 14222) GN=TDE_0712 PE=4 SV=1	240	1.25714e-35	32	256	260	93	91.2	5	5	3.35	ThrE	Glycine, Alanine
AAV43568.1	W4C0M8	2.A.79.1.7	gnl|BL_ORD_ID|18155 gnl|TC-DB|W4C0M8|2.A.79.1.7 Uncharacterized protein OS=Paenibacillus sp. FSL H8-237 GN=C171_23415 PE=4 SV=1	136	5.27137e-24	34	161	142	83.9	94.4	5	5	4.1	ThrE	Unknown
AAV43508.1	Q8L3K8	2.A.81.1.1	gnl|BL_ORD_ID|14617 gnl|TC-DB|Q8L3K8|2.A.81.1.1 Aspartate:alanine antiporter - Tetragenococcus halophilus (Pediococcus halophilus).	556	3.66123e-115	37	552	543	99.5	99.6	13	12	7.95	AAE	L-aspartate, L-alanine
AAV42533.1	O32095	2.A.86.1.8	gnl|BL_ORD_ID|6089 gnl|TC-DB|O32095|2.A.86.1.8 UPF0118 membrane protein yueF OS=Bacillus subtilis GN=yueF PE=3 SV=1	344	1.08883e-68	35	395	369	86.8	92.4	8	8	8.45	2.A.86	Unknown
AAV43736.1	Q03YI6	2.A.87.2.1	gnl|BL_ORD_ID|10653 gnl|TC-DB|Q03YI6|2.A.87.2.1 Pantothenate transporter PanT OS=Leuconostoc mesenteroides subsp. mesenteroides (strain ATCC 8293 / NCDO 523) GN=panT PE=1 SV=1	207	1.47888e-22	33	201	204	99	97.1	5	6	5.3	2.A.87	Pantothenate
AAV42963.1	P62723	2.A.98.1.3	gnl|BL_ORD_ID|9789 gnl|TC-DB|P62723|2.A.98.1.3 Hypothetical UPF0324 membrane protein yeiH - Escherichia coli.	301	1.1875e-40	32	328	349	89.9	82.8	10	10	7.6	PSE	Unknown
AAV42230.1	P0AD30	2.A.102.3.1	gnl|BL_ORD_ID|7535 gnl|TC-DB|P0AD30|2.A.102.3.1 Inner membrane protein yfcA - Escherichia coli.	242	1.02237e-15	20	252	269	95.6	89.2	9	9	7.1	TSUP	Unknown
AAV42648.1	P0ABG7	2.A.103.1.2	gnl|BL_ORD_ID|7499 gnl|TC-DB|P0ABG7|2.A.103.1.2 Rod shape-determining protein rodA - Escherichia coli.	387	2.11241e-46	32	397	370	96	96.8	10	9	4.75	MPE	Lipid II
AAV42694.1	P07373	2.A.103.1.3	gnl|BL_ORD_ID|7247 gnl|TC-DB|P07373|2.A.103.1.3 STAGE V SPORULATION PROTEIN E - Bacillus subtilis.	376	1.5408e-59	34	394	366	93.4	95.4	10	10	6	MPE	Lipid II
AAV42016.1	B5UIP4	2.A.109.1.3	gnl|BL_ORD_ID|1770 gnl|TC-DB|B5UIP4|2.A.109.1.3 Putative tellurium resistance protein OS=Bacillus cereus AH1134 GN=BCAH1134_0458 PE=4 SV=1	252	2.72546e-68	46	262	263	95.4	90.9	7	7	5.25	TerC	Unknown
AAV43045.1	P39803	2.A.115.1.1	gnl|BL_ORD_ID|8990 gnl|TC-DB|P39803|2.A.115.1.1 UPF0750 membrane protein yitT OS=Bacillus subtilis (strain 168) GN=yitT PE=3 SV=2	273	8.96511e-68	38	292	280	93.2	96.8	5	5	4.6	NbcE	Novobiocin
AAV42823.1	P94357	2.A.115.1.2	gnl|BL_ORD_ID|10298 gnl|TC-DB|P94357|2.A.115.1.2 UPF0750 membrane protein YxkD OS=Bacillus subtilis (strain 168) GN=yxkD PE=3 SV=1	279	5.92199e-54	30	295	278	93.6	97.5	5	5	4.6	NbcE	Unknown
AAV43166.1	P94357	2.A.115.1.2	gnl|BL_ORD_ID|10298 gnl|TC-DB|P94357|2.A.115.1.2 UPF0750 membrane protein YxkD OS=Bacillus subtilis (strain 168) GN=yxkD PE=3 SV=1	262	2.49874e-28	26	278	278	93.5	93.9	7	5	4.1	NbcE	Unknown
AAV43180.1	F2MS25	2.A.115.2.3	gnl|BL_ORD_ID|3763 gnl|TC-DB|F2MS25|2.A.115.2.3 Brp/Blh family beta-carotene 15,15'-monooxygenase OS=Enterococcus faecalis (strain ATCC 47077 / OG1RF) GN=OG1RF_11821 PE=4 SV=1	201	9.15425e-51	45	342	200	57.6	98.5	6	5	5	NbcE	Unknown
AAV43115.1	OQJ72346	2.A.129.1.9	gnl|BL_ORD_ID|6991 gnl|TC-DB|OQJ72346.1|2.A.129.1.9 hypothetical protein BMS77_04495 [Leuconostoc pseudomesenteroides]	129	4.9955e-06	24	142	136	90.1	94.1	4	4	3.6	LST	None
AAV43456.1	P29823	3.A.1.1.4	gnl|BL_ORD_ID|8392 gnl|TC-DB|P29823|3.A.1.1.4 Lactose transport system permease protein lacF - Agrobacterium radiobacter.	244	3.81951e-45	32	279	298	86	81.2	6	6	6.25	ABC	Lactose
AAV42385.1	Q7WWR0	3.A.1.1.20	gnl|BL_ORD_ID|13898 gnl|TC-DB|Q7WWR0|3.A.1.1.20 Substrate-binding protein MsmE - Lactobacillus acidophilus.	431	0	100	431	431	99.8	99.8	1	1	0.9	ABC	Fructooligosaccharides
AAV42386.1	Q7WWQ9	3.A.1.1.20	gnl|BL_ORD_ID|13897 gnl|TC-DB|Q7WWQ9|3.A.1.1.20 Transmembrane permease MsmF - Lactobacillus acidophilus.	294	0	100	294	294	99.7	99.7	6	6	6.6	ABC	Fructooligosaccharides
AAV42387.1	Q7WWQ8	3.A.1.1.20	gnl|BL_ORD_ID|13896 gnl|TC-DB|Q7WWQ8|3.A.1.1.20 Transmembrane permease MsmG - Lactobacillus acidophilus.	285	0	100	285	285	99.6	99.6	6	6	6.45	ABC	Fructooligosaccharides
AAV43665.1	Q8DT27	3.A.1.1.27	gnl|BL_ORD_ID|14278 gnl|TC-DB|Q8DT27|3.A.1.1.27 Putative maltose/maltodextrin ABC transporter, permease protein MalF - Streptococcus mutans.	442	2.83095e-166	56	452	453	96.5	96.2	8	8	8.95	ABC	Maltose, Maltotriose, Maltotetraose, Trehalose
AAV43664.1	Q8DT26	3.A.1.1.27	gnl|BL_ORD_ID|14277 gnl|TC-DB|Q8DT26|3.A.1.1.27 Putative maltose/maltodextrin ABC transporter, MalG permease - Streptococcus mutans.	279	6.69426e-104	55	285	278	97.2	98.6	6	6	6.05	ABC	Maltose, Maltotriose, Maltotetraose, Trehalose
AAV43666.1	Q8DT28	3.A.1.1.27	gnl|BL_ORD_ID|14279 gnl|TC-DB|Q8DT28|3.A.1.1.27 Putative maltose/maltodextrin ABC transporter, sugar-binding protein MalX - Streptococcus mutans.	417	5.32742e-95	40	408	415	98.5	98.3	1	1	0.85	ABC	Maltose, Maltotriose, Maltotetraose, Trehalose
AAV43267.1	Q00749	3.A.1.1.28	gnl|BL_ORD_ID|10483 gnl|TC-DB|Q00749|3.A.1.1.28 Multiple sugar-binding protein precursor - Streptococcus mutans.	417	0	61	418	420	98.8	98.8	1	1	0.85	ABC	Raffinose, Stachyose
AAV43265.1	Q00751	3.A.1.1.28	gnl|BL_ORD_ID|10485 gnl|TC-DB|Q00751|3.A.1.1.28 Multiple sugar-binding transport system permease protein msmG - Streptococcus mutans.	277	1.4701e-166	81	277	277	99.6	99.6	6	6	6.3	ABC	Raffinose, Stachyose
AAV43266.1	Q00750	3.A.1.1.28	gnl|BL_ORD_ID|10484 gnl|TC-DB|Q00750|3.A.1.1.28 Multiple sugar-binding transport system permease protein msmF - Streptococcus mutans.	290	1.66607e-165	74	291	290	99.3	99.7	6	6	6.4	ABC	Raffinose, Stachyose
AAV43741.1	Q8DU39	3.A.1.2.12	gnl|BL_ORD_ID|14283 gnl|TC-DB|Q8DU39|3.A.1.2.12 Putative ABC sugar transporter, permease protein - Streptococcus mutans.	318	9.72614e-160	66	318	318	99.7	99.7	10	9	8.3	ABC	Deoxyribonucleosides
AAV43302.1	A6VKS9	3.A.1.2.13	gnl|BL_ORD_ID|720 gnl|TC-DB|A6VKS9|3.A.1.2.13 Monosaccharide-transporting ATPase - Actinobacillus succinogenes (strain ATCC 55618 / 130Z).	275	5.77181e-98	53	285	322	96.1	85.1	7	9	6.55	ABC	Autoinducer-2
AAV43301.1	A6VKT0	3.A.1.2.13	gnl|BL_ORD_ID|721 gnl|TC-DB|A6VKT0|3.A.1.2.13 Monosaccharide-transporting ATPase - Actinobacillus succinogenes (strain ATCC 55618 / 130Z).	309	5.07951e-74	42	328	292	93.6	99	1	1	0.75	ABC	Autoinducer-2
AAV43740.1	A2RKA6	3.A.1.2.17	gnl|BL_ORD_ID|364 gnl|TC-DB|A2RKA6|3.A.1.2.17 Purine/cytidine ABC transporter permease protein OS=Lactococcus lactis subsp. cremoris (strain MG1363) GN=nupB PE=4 SV=1	361	2.65777e-114	48	383	364	93.2	98.6	9	8	7.65	ABC	Nucleosides
AAV43738.1	D2BKA1	3.A.1.2.17	gnl|BL_ORD_ID|2715 gnl|TC-DB|D2BKA1|3.A.1.2.17 Basic membrane lipoprotein OS=Lactococcus lactis subsp. lactis (strain KF147) GN=bmpA PE=4 SV=1	349	5.33049e-110	49	361	350	96.4	96.9	1	1	0.85	ABC	Nucleosides
AAV43737.1	D2BKA1	3.A.1.2.17	gnl|BL_ORD_ID|2715 gnl|TC-DB|D2BKA1|3.A.1.2.17 Basic membrane lipoprotein OS=Lactococcus lactis subsp. lactis (strain KF147) GN=bmpA PE=4 SV=1	342	1.28626e-81	41	353	350	95.5	96	1	1	0.75	ABC	Nucleosides
AAV42889.1	P0AEQ6	3.A.1.3.2	gnl|BL_ORD_ID|7574 gnl|TC-DB|P0AEQ6|3.A.1.3.2 Glutamine transport system permease protein glnP - Escherichia coli.	214	3.40255e-38	30	219	219	96.3	97.3	5	5	4.45	ABC	Glutamine
AAV42462.1	P0AFT2	3.A.1.3.10	gnl|BL_ORD_ID|7626 gnl|TC-DB|P0AFT2|3.A.1.3.10 Inner membrane amino-acid ABC transporter permease protein yecS - Escherichia coli.	203	4.05707e-40	38	218	222	92.7	90.5	5	5	4.6	ABC	DAP, Cystine
AAV43486.1	P54536	3.A.1.3.15	gnl|BL_ORD_ID|9592 gnl|TC-DB|P54536|3.A.1.3.15 Probable amino-acid ABC transporter permease protein yqiY - Bacillus subtilis.	202	4.7481e-46	40	215	219	92.6	91.8	5	5	4	ABC	Arginine
AAV42461.1	A1VZQ3	3.A.1.3.16	gnl|BL_ORD_ID|294 gnl|TC-DB|A1VZQ3|3.A.1.3.16 Amino acid ABC transporter, permease protein PEB1 - Campylobacter jejuni subsp. jejuni serotype O:23/36 (strain 81-176).	215	3.71982e-49	36	213	250	99.5	85.6	5	5	3	ABC	aspartate, glutamate
AAV42013.1	Q9A1H0	3.A.1.3.20	gnl|BL_ORD_ID|15706 gnl|TC-DB|Q9A1H0|3.A.1.3.20 Putative glutamine-binding periplasmic protein OS=Streptococcus pyogenes serotype M1 GN=SPy_0277 PE=4 SV=1	497	1.12456e-161	48	537	522	90.9	93.5	6	5	4.1	ABC	lysine
AAV43484.1	Q8RCC4	3.A.1.3.27	gnl|BL_ORD_ID|14819 gnl|TC-DB|Q8RCC4|3.A.1.3.27 ABC-type amino acid transport system, periplasmic component OS=Caldanaerobacter subterraneus subsp. tengcongensis (strain DSM 15242 / JCM 11007 / NBRC 100824 / MB4) GN=ArtI PE=3 SV=1	273	3.58408e-36	30	272	260	97.1	99.6	1	1	0.9	ABC	Glutamine, glutamate, Asparagine
AAV43752.1	Q2FZR3	3.A.1.5.19	gnl|BL_ORD_ID|11643 gnl|TC-DB|Q2FZR3|3.A.1.5.19 Oligopeptide ABC transporter, substrate-binding protein, putative - Staphylococcus aureus (strain NCTC 8325).	520	4.24813e-119	35	541	551	95.9	93.8	1	1	0.8	ABC	Oligopeptides
AAV43051.1	Q2FZR3	3.A.1.5.19	gnl|BL_ORD_ID|11643 gnl|TC-DB|Q2FZR3|3.A.1.5.19 Oligopeptide ABC transporter, substrate-binding protein, putative - Staphylococcus aureus (strain NCTC 8325).	528	2.67288e-107	33	541	551	97.4	95.3	1	1	0.8	ABC	Oligopeptides
AAV42092.1	Q9CIL2	3.A.1.5.25	gnl|BL_ORD_ID|15858 gnl|TC-DB|Q9CIL2|3.A.1.5.25 Oligopeptide ABC transporter substrate binding protein OS=Lactococcus lactis subsp. lactis GN=optA PE=4 SV=1	548	3.52425e-137	41	541	545	99.3	99.6	1	1	0.85	ABC	Oligopeptides, peptides
AAV42093.1	Q9CIL2	3.A.1.5.25	gnl|BL_ORD_ID|15858 gnl|TC-DB|Q9CIL2|3.A.1.5.25 Oligopeptide ABC transporter substrate binding protein OS=Lactococcus lactis subsp. lactis GN=optA PE=4 SV=1	550	2.97197e-127	39	542	545	99.6	99.8	1	1	0.9	ABC	Oligopeptides, peptides
AAV43477.1	Q9CIL2	3.A.1.5.25	gnl|BL_ORD_ID|15858 gnl|TC-DB|Q9CIL2|3.A.1.5.25 Oligopeptide ABC transporter substrate binding protein OS=Lactococcus lactis subsp. lactis GN=optA PE=4 SV=1	554	1.19709e-124	39	546	545	99.8	99.8	1	1	0.85	ABC	Oligopeptides, peptides
AAV42095.1	Q9CIL1	3.A.1.5.25	gnl|BL_ORD_ID|15857 gnl|TC-DB|Q9CIL1|3.A.1.5.25 Oligopeptide ABC trasporter permease protein OS=Lactococcus lactis subsp. lactis GN=optB PE=3 SV=1	304	6.28675e-119	54	309	303	98.1	99.7	6	6	4.95	ABC	Oligopeptides, peptides
AAV43755.1	Q9CIL2	3.A.1.5.25	gnl|BL_ORD_ID|15858 gnl|TC-DB|Q9CIL2|3.A.1.5.25 Oligopeptide ABC transporter substrate binding protein OS=Lactococcus lactis subsp. lactis GN=optA PE=4 SV=1	547	4.45981e-114	38	542	545	99.4	99.4	1	1	0.9	ABC	Oligopeptides, peptides
AAV42096.1	Q9CIL0	3.A.1.5.25	gnl|BL_ORD_ID|15856 gnl|TC-DB|Q9CIL0|3.A.1.5.25 Oligopeptide ABC trasporter permease protein OS=Lactococcus lactis subsp. lactis GN=optC PE=3 SV=1	340	6.05839e-100	47	343	343	97.1	98	6	5	5.1	ABC	Oligopeptides, peptides
AAV43225.1	F0TFS6	3.A.1.5.32	gnl|BL_ORD_ID|3691 gnl|TC-DB|F0TFS6|3.A.1.5.32 Oligopeptide ABC transporter substrate OS=Lactobacillus acidophilus (strain 30SC) GN=LAC30SC_07290 PE=4 SV=1	583	0	72	581	583	99.8	99.8	1	1	0.9	ABC	Alpha-galactosides
AAV43130.1	F0TFS5	3.A.1.5.32	gnl|BL_ORD_ID|3690 gnl|TC-DB|F0TFS5|3.A.1.5.32 Oligopeptide ABC trasporter substrate binding protein OS=Lactobacillus acidophilus (strain 30SC) GN=LAC30SC_07285 PE=4 SV=1	590	0	88	585	590	99.8	99.8	1	1	0.9	ABC	Alpha-galactosides
AAV43131.1	F0TFS6	3.A.1.5.32	gnl|BL_ORD_ID|3691 gnl|TC-DB|F0TFS6|3.A.1.5.32 Oligopeptide ABC transporter substrate OS=Lactobacillus acidophilus (strain 30SC) GN=LAC30SC_07290 PE=4 SV=1	589	0	68	589	583	99.8	99.8	1	1	0.9	ABC	Alpha-galactosides
AAV43132.1	F0TFS7	3.A.1.5.32	gnl|BL_ORD_ID|3692 gnl|TC-DB|F0TFS7|3.A.1.5.32 Oligopeptide ABC transporter, permease protein OS=Lactobacillus acidophilus (strain 30SC) GN=LAC30SC_07295 PE=3 SV=1	310	0	90	309	310	99.7	99.7	5	6	5	ABC	Alpha-galactosides
AAV43133.1	F0TFS8	3.A.1.5.32	gnl|BL_ORD_ID|3693 gnl|TC-DB|F0TFS8|3.A.1.5.32 Oligopeptide transport protein OS=Lactobacillus acidophilus (strain 30SC) GN=LAC30SC_07300 PE=3 SV=1	319	0	97	319	319	99.7	99.7	6	6	6.6	ABC	Alpha-galactosides
AAV42054.1	P16683	3.A.1.9.1	gnl|BL_ORD_ID|7982 gnl|TC-DB|P16683|3.A.1.9.1 Phosphonates transport system permease protein phnE - Escherichia coli.	251	8.33834e-50	36	265	259	94.3	95.4	6	6	4.7	ABC	Fe3+
AAV41921.1	A0QQ71	3.A.1.9.2	gnl|BL_ORD_ID|181 gnl|TC-DB|A0QQ71|3.A.1.9.2 Phosphonate-binding periplasmic protein - Mycobacterium smegmatis (strain ATCC 700084 / mc(2)155).	310	4.08945e-24	25	313	321	93.3	93.5	1	1	0	ABC	Phosphonate, phosphate
AAV42055.1	Q119I8	3.A.1.9.3	gnl|BL_ORD_ID|11046 gnl|TC-DB|Q119I8|3.A.1.9.3 Phosphonate ABC transporter, inner membrane subunit OS=Trichodesmium erythraeum (strain IMS101) OX=203124 GN=Tery_0367 PE=3 SV=1	262	1.48891e-45	32	270	272	94.1	93.8	6	6	5.7	ABC	None
AAV42586.1	Q97Q45	3.A.1.11.7	gnl|BL_ORD_ID|15591 gnl|TC-DB|Q97Q45|3.A.1.11.7 Spermidine/putrescine ABC transporter, spermidine/putrescine-binding protein OS=Streptococcus pneumoniae serotype 4 (strain ATCC BAA-334 / TIGR4) GN=potD PE=4 SV=1	357	1.20573e-141	54	357	356	99.7	99.7	1	1	0.85	ABC	Spermidine, Putrescine
AAV42584.1	Q97Q43	3.A.1.11.7	gnl|BL_ORD_ID|15589 gnl|TC-DB|Q97Q43|3.A.1.11.7 Spermidine/putrescine ABC transporter, permease protein OS=Streptococcus pneumoniae serotype 4 (strain ATCC BAA-334 / TIGR4) GN=potH PE=3 SV=1	266	2.83398e-115	60	270	275	97.4	96.4	6	6	6.05	ABC	Spermidine, Putrescine
AAV42585.1	Q97Q44	3.A.1.11.7	gnl|BL_ORD_ID|15590 gnl|TC-DB|Q97Q44|3.A.1.11.7 Spermidine/putrescine ABC transporter, permease protein OS=Streptococcus pneumoniae serotype 4 (strain ATCC BAA-334 / TIGR4) GN=potC PE=3 SV=1	253	1.29836e-102	60	271	257	93	97.7	6	7	5.9	ABC	Spermidine, Putrescine
AAV42761.1	Q8K8K9	3.A.1.24.3	gnl|BL_ORD_ID|14569 gnl|TC-DB|Q8K8K9|3.A.1.24.3 Putative lipoprotein (Putative uncharacterized protein SPs1626) OS=Streptococcus pyogenes serotype M3 GN=atmB PE=4 SV=1	257	1.32478e-73	46	284	281	86.3	90.7	1	1	0.75	ABC	Methionine
AAV43220.1	Q8K8K9	3.A.1.24.3	gnl|BL_ORD_ID|14569 gnl|TC-DB|Q8K8K9|3.A.1.24.3 Putative lipoprotein (Putative uncharacterized protein SPs1626) OS=Streptococcus pyogenes serotype M3 GN=atmB PE=4 SV=1	249	8.97165e-60	41	283	281	83.7	87.9	1	1	0.8	ABC	Methionine
AAV42763.1	Q04MS5	3.A.1.24.6	gnl|BL_ORD_ID|10690 gnl|TC-DB|Q04MS5|3.A.1.24.6 ABC transporter, permease protein, putative OS=Streptococcus pneumoniae serotype 2 (strain D39 / NCTC 7466) GN=SPD_0154 PE=3 SV=1	231	3.56541e-91	57	233	230	98.7	99.6	5	5	4.75	ABC	peptides
AAV42816.1	Q8Y5W0	3.A.1.25.8	gnl|BL_ORD_ID|15131 gnl|TC-DB|Q8Y5W0|3.A.1.25.8 Riboflavin transporter OS=Listeria monocytogenes serovar 1/2a (strain ATCC BAA-679 / EGD-e) GN=lmo1945 PE=3 SV=1	204	3.48274e-25	31	229	203	88.6	84.7	5	5	3.55	ABC	None
AAV42278.1	Q03S56	3.A.1.26.9	gnl|BL_ORD_ID|10651 gnl|TC-DB|Q03S56|3.A.1.26.9 Uncharacterized protein OS=Lactobacillus brevis (strain ATCC 367 / JCM 1170) GN=LVIS_0823 PE=4 SV=1	164	2.75801e-39	38	178	177	91.6	91	5	5	4.6	ABC	folate
AAV42213.1	I7BV49	3.A.1.26.10	gnl|BL_ORD_ID|4836 gnl|TC-DB|I7BV49|3.A.1.26.10 Energy-coupling factor transporter transmembrane protein EcfT OS=Enterococcus faecalis D32 GN=ecfT PE=3 SV=1	264	1.34154e-97	52	265	264	99.2	99.6	6	6	4.95	ABC	Folic acid
AAV42777.1	Q74I61	3.A.1.29.1	gnl|BL_ORD_ID|13588 gnl|TC-DB|Q74I61|3.A.1.29.1 ABC transporter permease component OS=Lactobacillus johnsonii GN=LJ_1705 PE=4 SV=1	275	1.13689e-149	72	277	276	98.9	99.3	6	6	5.4	ABC	Methionine precursors
AAV42779.1	Q74I63	3.A.1.29.1	gnl|BL_ORD_ID|13590 gnl|TC-DB|Q74I63|3.A.1.29.1 UPF0397 protein LJ_1703 OS=Lactobacillus johnsonii GN=LJ_1703 PE=3 SV=1	183	3.62061e-101	76	185	185	98.4	98.4	5	5	5.1	ABC	Methionine precursors
AAV42457.1	Q97RS4	3.A.1.30.2	gnl|BL_ORD_ID|15595 gnl|TC-DB|Q97RS4|3.A.1.30.2 Putative uncharacterized protein OS=Streptococcus pneumoniae serotype 4 (strain ATCC BAA-334 / TIGR4) GN=SP_0719 PE=4 SV=1	177	7.28841e-37	37	192	186	91.7	93	4	4	2.35	ABC	thiamin
AAV41994.1	Q97RS2	3.A.1.30.2	gnl|BL_ORD_ID|15593 gnl|TC-DB|Q97RS2|3.A.1.30.2 Putative uncharacterized protein OS=Streptococcus pneumoniae serotype 4 (strain ATCC BAA-334 / TIGR4) GN=SP_0721 PE=4 SV=1	209	3.35262e-17	25	217	216	94.9	93.5	5	6	3.75	ABC	thiamin
AAV41952.1	Q99ZY4	3.A.1.34.1	gnl|BL_ORD_ID|15696 gnl|TC-DB|Q99ZY4|3.A.1.34.1 ABC transporter permease protein OS=Streptococcus pyogenes serotype M1 GN=M5005_Spy0745 PE=4 SV=1	285	1.02983e-101	52	298	289	94.3	96.5	9	8	6.8	ABC	tryptophan
AAV41953.1	Q99ZY6	3.A.1.34.1	gnl|BL_ORD_ID|15697 gnl|TC-DB|Q99ZY6|3.A.1.34.1 ABC transporter substrate-binding protein OS=Streptococcus pyogenes serotype M1 GN=M5005_Spy0743 PE=4 SV=1	325	5.07726e-76	38	330	332	97	97.3	1	1	0.75	ABC	tryptophan
AAV43107.1	P77265	3.A.1.106.13	gnl|BL_ORD_ID|10099 gnl|TC-DB|P77265|3.A.1.106.13 Multidrug resistance-like ATP-binding protein MdlA OS=Escherichia coli (strain K12) GN=mdlA PE=3 SV=1	584	3.48426e-167	43	588	590	99.1	98	7	7	6.75	ABC	peptides
AAV41977.1	Q0P9C4	3.A.1.106.15	gnl|BL_ORD_ID|10948 gnl|TC-DB|Q0P9C4|3.A.1.106.15 Protein glycosylation K OS=Campylobacter jejuni subsp. jejuni serotype O:2 (strain ATCC 700819 / NCTC 11168) GN=pglK PE=1 SV=1	536	1.93362e-37	27	530	564	92.1	91.1	4	5	2.55	ABC	lipids
AAV43659.1	P33116	3.A.1.111.2	gnl|BL_ORD_ID|8590 gnl|TC-DB|P33116|3.A.1.111.2 Subtilin transport ATP-binding protein spaT - Bacillus subtilis.	586	1.08724e-82	29	587	614	98	94.8	5	5	4.6	ABC	Subtilin
AAV43600.1	B5E244	3.A.1.112.5	gnl|BL_ORD_ID|1742 gnl|TC-DB|B5E244|3.A.1.112.5 BlpC ABC transporter, ATP-binding protein (BlpA) OS=Streptococcus pneumoniae serotype 19F (strain G54) GN=blpA PE=3 SV=1	716	0	57	720	717	99.3	99.4	6	6	4.85	ABC	BlpC, BlpA, BlpB
AAV42476.1	O32748	3.A.1.117.2	gnl|BL_ORD_ID|6113 gnl|TC-DB|O32748|3.A.1.117.2 PLASMID DNA FOR HORA - Lactobacillus brevis.	568	0	57	585	583	96.8	97.3	7	5	5.35	ABC	Hop compounds
AAV43641.1	H2GZC4	3.A.1.122.11	gnl|BL_ORD_ID|4542 gnl|TC-DB|H2GZC4|3.A.1.122.11 ABC transporter system involved in hemin toxicity inner membrane protein OS=Corynebacterium diphtheriae (strain ATCC 27012 / C7 (beta)) GN=hrtB PE=4 SV=1	362	6.90581e-26	24	353	344	99.4	98.8	4	4	3.05	ABC	Hemin
AAV43640.1	Q58206	3.A.1.122.14	gnl|BL_ORD_ID|12564 gnl|TC-DB|Q58206|3.A.1.122.14 Uncharacterized ABC transporter ATP-binding protein MJ0796 OS=Methanocaldococcus jannaschii (strain ATCC 43067 / DSM 2661 / JAL-1 / JCM 10045 / NBRC 100440) GN=MJ0796 PE=1 SV=1	227	2.68803e-54	44	224	235	98.7	96.2	2	1	0.35	ABC	Unknown
AAV42140.1	KRO08311	3.A.1.130.3	gnl|BL_ORD_ID|5291 gnl|TC-DB|KRO08311.1|3.A.1.130.3 ABC transporter permease [Lactobacillus hokkaidonensis]	251	1.34308e-49	37	288	263	85.1	94.3	6	5	5	ABC	None
AAV43491.1	Q8Y5E9	3.A.1.134.12	gnl|BL_ORD_ID|15127 gnl|TC-DB|Q8Y5E9|3.A.1.134.12 Lmo2115 protein OS=Listeria monocytogenes serovar 1/2a (strain ATCC BAA-679 / EGD-e) GN=lmo2115 PE=4 SV=1	655	1.69327e-48	26	600	646	99.7	99.4	10	10	7.6	ABC	Beta-lactam antibiotics, Nisin, Gallidermin, Bacitracin
AAV42456.1	Q837P4	3.A.1.135.8	gnl|BL_ORD_ID|14002 gnl|TC-DB|Q837P4|3.A.1.135.8 ABC transporter, ATP-binding/permease protein OS=Enterococcus faecalis (strain ATCC 700802 / V583) GN=EF_0790 PE=4 SV=1	589	0	55	589	589	99.8	99.8	5	5	4.85	ABC	daunorubicin, doxorubicin, ethidium, Hoechst 33342, Fluoroquinolones
AAV42455.1	Q837P5	3.A.1.135.8	gnl|BL_ORD_ID|14003 gnl|TC-DB|Q837P5|3.A.1.135.8 ABC transporter, ATP-binding/permease protein OS=Enterococcus faecalis (strain ATCC 700802 / V583) GN=EF_0789 PE=4 SV=1	568	0	51	576	571	98.4	99.1	6	6	5.4	ABC	daunorubicin, doxorubicin, ethidium, Hoechst 33342, Fluoroquinolones
AAV43624.1	A4XGX0	3.A.1.135.10	gnl|BL_ORD_ID|535 gnl|TC-DB|A4XGX0|3.A.1.135.10 ABC transporter related protein OS=Caldicellulosiruptor saccharolyticus (strain ATCC 43494 / DSM 8903 / Tp8T 6331) OX=351627 GN=Csac_0521 PE=4 SV=1	573	1.42522e-154	41	576	578	99.1	98.6	6	7	6.1	ABC	None
AAV43623.1	A4XGX1	3.A.1.135.10	gnl|BL_ORD_ID|536 gnl|TC-DB|A4XGX1|3.A.1.135.10 ABC transporter related protein OS=Caldicellulosiruptor saccharolyticus (strain ATCC 43494 / DSM 8903 / Tp8T 6331) OX=351627 GN=Csac_0522 PE=4 SV=1	601	3.27998e-149	40	621	615	96.6	92.8	5	5	4.3	ABC	None
AAV43319.1	P77307	3.A.1.139.2	gnl|BL_ORD_ID|10106 gnl|TC-DB|P77307|3.A.1.139.2 UPF0014 inner membrane protein ybbM OS=Escherichia coli (strain K12) GN=ybbM PE=1 SV=2	251	9.23796e-99	59	254	259	98.4	96.5	7	7	6.45	ABC	Fe2+
AAV43400.1	P55340	3.A.1.143.1	gnl|BL_ORD_ID|9634 gnl|TC-DB|P55340|3.A.1.143.1 Protein ecsB OS=Bacillus subtilis (strain 168) GN=ecsB PE=4 SV=1	406	5.83797e-44	29	403	408	97	98	10	10	6.95	ABC	proteins
AAV42640.1	P21904	3.A.2.1.2	gnl|BL_ORD_ID|8118 gnl|TC-DB|P21904|3.A.2.1.2 ATP synthase B chain, sodium ion specific (EC 3.6.3.15) - Propionigenium modestum.	148	1.11895e-21	31	169	168	87	87.5	1	1	0.75	F-ATPase	Na+
AAV42639.1	BAK19942	3.A.2.1.10	gnl|BL_ORD_ID|2053 gnl|TC-DB|BAK19942|3.A.2.1.10 ApH+ATPase c subunit [Aphanothece halophytica]	76	9.65221e-17	41	77	81	97.4	92.6	2	2	2.15	F-ATPase	protons, H+
AAV42531.1	Q2FLJ9	3.A.3.1.8	gnl|BL_ORD_ID|11628 gnl|TC-DB|Q2FLJ9|3.A.3.1.8 ATPase, E1-E2 type OS=Methanospirillum hungatei (strain JF-1 / DSM 864) GN=Mhun_0636 PE=4 SV=1	903	0	48	919	931	97.4	96.3	8	10	6.25	P-ATPase	Na+, K+
AAV43495.1	A9BJX0	3.A.3.2.21	gnl|BL_ORD_ID|973 gnl|TC-DB|A9BJX0|3.A.3.2.21 Calcium-translocating P-type ATPase, PMCA-type OS=Petrotoga mobilis (strain DSM 10674 / SJ95) GN=Pmob_0991 PE=3 SV=1	883	0	46	879	887	97.8	99.2	10	10	6.15	P-ATPase	Ca2+
AAV42404.1	Q04JJ5	3.A.3.2.28	gnl|BL_ORD_ID|10689 gnl|TC-DB|Q04JJ5|3.A.3.2.28 Cation-transporting ATPase, E1-E2 family protein OS=Streptococcus pneumoniae serotype 2 (strain D39 / NCTC 7466) GN=SPD_1383 PE=3 SV=1	895	0	61	890	898	99.4	98.4	10	10	8	P-ATPase	Ca2+, Mn2+
AAV43214.1	GAT39076	3.A.3.2.46	gnl|BL_ORD_ID|4461 gnl|TC-DB|GAT39076.1|3.A.3.2.46 ATPase [Listeria monocytogenes]	893	0	47	875	880	99.3	99.4	10	9	7	P-ATPase	None
AAV43067.1	Q9X6G0	3.A.3.3.3	gnl|BL_ORD_ID|17225 gnl|TC-DB|Q9X6G0|3.A.3.3.3 Cadmium/manganese transport ATPase - Lactobacillus plantarum.	740	0	51	757	758	96.7	97.1	7	9	5.9	P-ATPase	Mn2+, Cd2+
AAV42107.1	I4G6G7	3.A.3.4.5	gnl|BL_ORD_ID|4798 gnl|TC-DB|I4G6G7|3.A.3.4.5 Magnesium-transporting ATPase, P-type 1 OS=Microcystis aeruginosa PCC 9443 OX=1160281 GN=mgtA PE=4 SV=1	893	0	38	887	912	97.9	95.3	10	8	6.1	P-ATPase	None
AAV42760.1	Q835V4	3.A.3.23.2	gnl|BL_ORD_ID|14001 gnl|TC-DB|Q835V4|3.A.3.23.2 Cation-transporting ATPase, E1-E2 family - Enterococcus faecalis (Streptococcus faecalis).	771	0	58	806	806	94.8	95.2	12	10	6.9	P-ATPase	cations
AAV43726.1	Q830Z1	3.A.3.25.3	gnl|BL_ORD_ID|13998 gnl|TC-DB|Q830Z1|3.A.3.25.3 Cadmium-translocating P-type ATPase - Enterococcus faecalis (Streptococcus faecalis).	609	0	50	618	601	97.9	99.2	7	7	3.65	P-ATPase	cations
AAV42203.1	P16336	3.A.5.2.1	gnl|BL_ORD_ID|7965 gnl|TC-DB|P16336|3.A.5.2.1 PREPROTEIN TRANSLOCASE SECY SUBUNIT - Bacillus subtilis.	435	6.0021e-137	49	431	431	99.8	99.5	10	10	8.9	Sec	proteins
AAV42075.1	Q15HU6	3.A.7.14.2	gnl|BL_ORD_ID|11210 gnl|TC-DB|Q15HU6|3.A.7.14.2 TcpG - Clostridium perfringens.	159	1.61117e-27	40	409	334	38.4	45.5	1	1	0.9	IVSP	DNA
AAV42408.1	Q15HU6	3.A.7.14.2	gnl|BL_ORD_ID|11210 gnl|TC-DB|Q15HU6|3.A.7.14.2 TcpG - Clostridium perfringens.	157	2.64475e-26	38	215	334	71.6	45.8	1	1	0.4	IVSP	DNA
AAV42954.1	Q15HU4	3.A.7.14.2	gnl|BL_ORD_ID|11208 gnl|TC-DB|Q15HU4|3.A.7.14.2 TcpI - Clostridium perfringens.	187	1.25345e-14	29	184	164	97.8	99.4	4	4	1.6	IVSP	DNA
AAV43555.1	Q15HU6	3.A.7.14.2	gnl|BL_ORD_ID|11210 gnl|TC-DB|Q15HU6|3.A.7.14.2 TcpG - Clostridium perfringens.	116	3.19223e-13	40	184	334	54.9	33.5	1	1	0	IVSP	DNA
AAV43553.1	Q15HU6	3.A.7.14.2	gnl|BL_ORD_ID|11210 gnl|TC-DB|Q15HU6|3.A.7.14.2 TcpG - Clostridium perfringens.	140	2.23715e-12	31	299	334	42.8	40.7	1	1	0	IVSP	DNA
AAV43683.1	Q15HU6	3.A.7.14.2	gnl|BL_ORD_ID|11210 gnl|TC-DB|Q15HU6|3.A.7.14.2 TcpG - Clostridium perfringens.	100	1.39061e-11	37	160	334	55.6	29.3	2	1	0	IVSP	DNA
AAV42699.1	P39694	3.A.11.1.1	gnl|BL_ORD_ID|8977 gnl|TC-DB|P39694|3.A.11.1.1 COME OPERON PROTEIN 1 - Bacillus subtilis.	172	1.34148e-39	44	227	205	74.4	79	1	1	0.5	DNA-T	ssDNA
AAV42301.1	AKM80389	3.A.11.1.5	gnl|BL_ORD_ID|1209 gnl|TC-DB|AKM80389.1|3.A.11.1.5 Holliday junction ATP-dependent DNA helicase RuvA [Candidatus Saccharibacteria bacterium GW2011_GWC2_44_17]	189	2.47314e-27	35	195	192	93.3	95.8	1	1	0	DNA-T	None
AAV42536.1	P21458	3.A.12.1.1	gnl|BL_ORD_ID|8100 gnl|TC-DB|P21458|3.A.12.1.1 Stage III sporulation protein E - Bacillus subtilis.	805	0	44	811	787	96.9	98.3	4	4	3.35	S-DNA-T	DNA
AAV42485.1	ART98514	4.A.1.1.19	gnl|BL_ORD_ID|1338 gnl|TC-DB|ART98514|4.A.1.1.19 PTS alpha-glucoside transporter subunit IICB [Lactobacillus gasseri]	629	0	77	626	628	99.5	99.5	12	12	10.95	Glc	alpha-glucosides
AAV43392.1	P40739	4.A.1.2.11	gnl|BL_ORD_ID|9065 gnl|TC-DB|P40739|4.A.1.2.11 PTS system, beta-glucoside-specific IIBCA component (EIIBCA-Bgl) (Beta-glucoside-permease IIBCA component) (Phosphotransferase enzyme II, BCA component) (EC 2.7.1.69) (EII-Bgl) - Bacillus subtilis.	555	2.91945e-146	39	560	609	98.8	89.3	9	10	9	Glc	Aryl beta-glucosides
AAV42596.1	ART98499	4.A.1.2.14	gnl|BL_ORD_ID|1337 gnl|TC-DB|ART98499|4.A.1.2.14 PTS beta-glucoside transporter subunit EIIBCA [Lactobacillus gasseri]	667	0	62	663	672	98.6	99.1	10	12	9.35	Glc	beta-glucosides
AAV43298.1	ART98499	4.A.1.2.14	gnl|BL_ORD_ID|1337 gnl|TC-DB|ART98499|4.A.1.2.14 PTS beta-glucoside transporter subunit EIIBCA [Lactobacillus gasseri]	659	0	42	734	672	84.3	97.2	10	12	7.4	Glc	beta-glucosides
AAV42861.1	ART98499	4.A.1.2.14	gnl|BL_ORD_ID|1337 gnl|TC-DB|ART98499|4.A.1.2.14 PTS beta-glucoside transporter subunit EIIBCA [Lactobacillus gasseri]	481	9.87051e-94	36	643	672	72.3	69.2	9	12	6.55	Glc	beta-glucosides
AAV43519.1	ART98417	4.A.1.2.15	gnl|BL_ORD_ID|1336 gnl|TC-DB|ART98417|4.A.1.2.15 PTS beta-glucoside transporter subunit EIIBCA [Lactobacillus gasseri]	627	0	78	625	624	99.8	99.8	9	7	6.25	Glc	beta-glucosides
AAV42292.1	ART98386	4.A.1.2.16	gnl|BL_ORD_ID|1335 gnl|TC-DB|ART98386|4.A.1.2.16 PTS beta-glucoside transporter subunit EIIBCA [Lactobacillus gasseri]	646	0	81	649	647	99.4	99.5	9	10	8.25	Glc	beta glucosides
AAV43517.1	S6FVR4	4.A.1.2.17	gnl|BL_ORD_ID|17738 gnl|TC-DB|S6FVR4|4.A.1.2.17 PTS system N-acetylmuramic acid-specific EIIBC component OS=Bacillus velezensis UCMB5033 OX=1338518 GN=murP PE=4 SV=1	464	1.15462e-122	45	663	455	69.7	96.3	10	12	6.05	Glc	None
AAV43584.1	Q1LZ59	4.A.2.1.7	gnl|BL_ORD_ID|11441 gnl|TC-DB|Q1LZ59|4.A.2.1.7 Inducible fructose permease - Streptococcus mutans UA159.	676	0	48	665	655	98.6	99.5	10	10	8.65	Fru	fructose, Xylitol
AAV42497.1	Q9CJ32	4.A.3.2.4	gnl|BL_ORD_ID|15861 gnl|TC-DB|Q9CJ32|4.A.3.2.4 Cellobiose-specific PTS system IIC component - Lactococcus lactis subsp. lactis (Streptococcus lactis).	488	9.19568e-102	37	441	494	96.8	98.6	10	9	5.05	Lac	Cellobiose
AAV42839.1	C4X745	4.A.3.2.7	gnl|BL_ORD_ID|2317 gnl|TC-DB|C4X745|4.A.3.2.7 PEP-dependent phosphotransferase enzyme II OS=Klebsiella pneumoniae subsp. pneumoniae NTUH-K2044 GN=celB PE=4 SV=1	445	6.04762e-28	25	428	452	99.1	96.9	10	10	6.5	Lac	N,N'-diacetylchitobiose
AAV43710.1	C4X745	4.A.3.2.7	gnl|BL_ORD_ID|2317 gnl|TC-DB|C4X745|4.A.3.2.7 PEP-dependent phosphotransferase enzyme II OS=Klebsiella pneumoniae subsp. pneumoniae NTUH-K2044 GN=celB PE=4 SV=1	460	7.16054e-23	24	436	452	99.8	97.6	10	10	7.25	Lac	N,N'-diacetylchitobiose
AAV42376.1	Q72XQ0	4.A.3.2.8	gnl|BL_ORD_ID|13512 gnl|TC-DB|Q72XQ0|4.A.3.2.8 PTS system, cellobiose-specific IIC component OS=Bacillus cereus (strain ATCC 10987) GN=celB PE=1 SV=1	437	7.97208e-115	42	445	433	96.2	98.4	10	10	8.25	Lac	N-, N'-diacetylchitobiose
AAV42122.1	Q72XQ0	4.A.3.2.8	gnl|BL_ORD_ID|13512 gnl|TC-DB|Q72XQ0|4.A.3.2.8 PTS system, cellobiose-specific IIC component OS=Bacillus cereus (strain ATCC 10987) GN=celB PE=1 SV=1	444	6.55912e-92	36	441	433	98.9	99.3	10	10	7.9	Lac	N-, N'-diacetylchitobiose
AAV43194.1	Q72XQ0	4.A.3.2.8	gnl|BL_ORD_ID|13512 gnl|TC-DB|Q72XQ0|4.A.3.2.8 PTS system, cellobiose-specific IIC component OS=Bacillus cereus (strain ATCC 10987) GN=celB PE=1 SV=1	427	2.02996e-83	35	417	433	95.4	97.9	12	10	6.2	Lac	N-, N'-diacetylchitobiose
AAV42743.1	O05507	4.A.3.2.10	gnl|BL_ORD_ID|5782 gnl|TC-DB|O05507|4.A.3.2.10 PTS system oligo-beta-mannoside-specific EIIC component OS=Bacillus subtilis (strain 168) OX=224308 GN=gmuC PE=1 SV=1	466	5.36253e-83	33	475	442	97.3	97.1	10	10	6.05	Lac	None
AAV42343.1	Q2QKM2	4.A.6.1.6	gnl|BL_ORD_ID|11712 gnl|TC-DB|Q2QKM2|4.A.6.1.6 EIID - Lactobacillus casei.	299	3.51772e-165	71	307	303	97.1	97.7	4	4	3.8	Man	glucose
AAV42342.1	Q04GK0	4.A.6.1.10	gnl|BL_ORD_ID|10687 gnl|TC-DB|Q04GK0|4.A.6.1.10 Mannose-specific PTS system component IIC OS=Oenococcus oeni (strain BAA-331 / PSU-1) GN=OEOE_0465 PE=4 SV=1	271	4.92464e-143	76	269	271	99.6	99.6	7	7	6.5	Man	glucose, fructose
AAV42341.1	Q04GK1	4.A.6.1.10	gnl|BL_ORD_ID|10688 gnl|TC-DB|Q04GK1|4.A.6.1.10 Phosphotransferase system, mannose/fructose-specific component IIA OS=Oenococcus oeni (strain BAA-331 / PSU-1) GN=OEOE_0464 PE=4 SV=1	336	2.36734e-137	60	336	331	99.4	99.4	1	1	0.8	Man	glucose, fructose
AAV43241.1	Q54066	4.D.1.1.2	gnl|BL_ORD_ID|12364 gnl|TC-DB|Q54066|4.D.1.1.2 Poly-beta-1,6-N-acetyl-D-glucosamine synthase OS=Staphylococcus epidermidis (strain ATCC 35984 / RP62A) GN=icaA PE=1 SV=1	422	2.94159e-53	29	425	412	96.7	98.1	4	4	3.65	VGP	Glycosyl residues
AAV43113.1	Q55487	4.D.1.1.14	gnl|BL_ORD_ID|12444 gnl|TC-DB|Q55487|4.D.1.1.14 Uncharacterized glycosyltransferase sll0501 OS=Synechocystis sp. (strain PCC 6803 / Kazusa) GN=sll0501 PE=3 SV=1	306	1.70703e-76	39	310	318	98.4	94.7	2	2	2.05	VGP	None
AAV43599.1	Q9XDR9	8.A.1.5.1	gnl|BL_ORD_ID|17262 gnl|TC-DB|Q9XDR9|8.A.1.5.1 ORF2 PROTEIN - Lactobacillus gasseri.	197	4.83066e-79	56	196	197	99.5	98.5	1	1	1.2	MFP	NONE
AAV43548.1	P39850	8.A.3.2.1	gnl|BL_ORD_ID|8997 gnl|TC-DB|P39850|8.A.3.2.1 CAPA protein - Staphylococcus aureus.	260	2.37713e-30	29	291	221	88.7	98.6	2	2	0.8	MPA1-C or MPA1+C	NONE
AAV43381.1	P0AA53	8.A.21.2.2	gnl|BL_ORD_ID|7442 gnl|TC-DB|P0AA53|8.A.21.2.2 Protein QmcA OS=Escherichia coli (strain K12) GN=qmcA PE=1 SV=1	302	9.90348e-34	28	293	305	98.3	98.7	1	1	1	Stomatin	NONE
AAV42393.1	Q9K7V5	9.A.23.1.1	gnl|BL_ORD_ID|16277 gnl|TC-DB|Q9K7V5|9.A.23.1.1 BH3254 protein OS=Bacillus halodurans GN=BH3254 PE=4 SV=1	341	3.77951e-25	24	347	336	96.5	91.4	8	8	3.3	NNT	Niacin, Nicotinamide
AAV41997.1	P23894	9.B.1.1.6	gnl|BL_ORD_ID|8200 gnl|TC-DB|P23894|9.B.1.1.6 Protease HtpX OS=Escherichia coli (strain K12) GN=htpX PE=1 SV=1	289	2.46938e-32	35	298	293	93.6	92.8	4	4	3.3	CAAX Protease	proteins
AAV43733.1	C7T7I3	9.B.2.1.18	gnl|BL_ORD_ID|2468 gnl|TC-DB|C7T7I3|9.B.2.1.18 Putative protease OS=Lactobacillus rhamnosus (strain ATCC 53103 / GG) GN=LRHM_2521 PE=4 SV=1	206	4.30983e-20	27	217	215	93.1	93	5	6	3.45	CAAX Protease2	Unknown
AAV42924.1	C0SP99	9.B.10.1.1	gnl|BL_ORD_ID|2122 gnl|TC-DB|C0SP99|9.B.10.1.1 9.B.10.1.1 Putative L,D-transpeptidase YciB	208	9.8643e-21	33	202	194	96	96.4	1	1	0.75	9.B.10	Zn2+
AAV42329.1	P0ABP6	9.B.27.2.3	gnl|BL_ORD_ID|7516 gnl|TC-DB|P0ABP6|9.B.27.2.3 Protein dedA OS=Escherichia coli (strain K12) GN=dedA PE=1 SV=1	208	1.88232e-64	49	216	219	94.9	93.2	5	6	4.5	DedA	Selenite
AAV42797.1	D6GX19	9.B.27.2.5	gnl|BL_ORD_ID|3019 gnl|TC-DB|D6GX19|9.B.27.2.5 SNARE associated protein OS=Candidatus Parvarchaeum acidophilus ARMAN-5 GN=BJBARM5_1043 PE=4 SV=1	187	4.59119e-34	32	204	206	91.2	87.9	5	5	4.95	DedA	Unknown
AAV43716.1	BAQ24849	9.B.28.2.7	gnl|BL_ORD_ID|2063 gnl|TC-DB|BAQ24849.1|9.B.28.2.7 uncharacterized protein SRT_15880 [Streptococcus troglodytae]	235	8.41749e-41	35	225	245	97.3	91	4	4	3.95	MusI	None
AAV42002.1	WP_084131416	9.B.28.5.1	gnl|BL_ORD_ID|18788 gnl|TC-DB|WP_084131416.1|9.B.28.5.1 hypothetical protein [Enterococcus aquimarinus]	571	2.53039e-89	32	585	598	93.2	94.1	7	7	5.65	MusI	None
AAV42965.1	Q45064	9.B.31.1.2	gnl|BL_ORD_ID|11995 gnl|TC-DB|Q45064|9.B.31.1.2 Glycerol-3-phosphate acyltransferase OS=Bacillus subtilis (strain 168) GN=plsY PE=1 SV=1	189	3.88228e-54	49	211	193	89.1	96.4	5	5	5	PlsY	Unknown
AAV42565.1	WP_095837247	9.B.36.1.4	gnl|BL_ORD_ID|18893 gnl|TC-DB|WP_095837247.1|9.B.36.1.4 HdeD family acid-resistance protein [Chitinophaga sp. MD30]	169	4.31147e-15	27	180	183	91.7	89.6	6	6	5.8	HdeD	None
AAV42041.1	H3P2R4	9.B.141.1.2	gnl|BL_ORD_ID|4574 gnl|TC-DB|H3P2R4|9.B.141.1.2 Hypothetical membrane protein, YibE/F family OS=Lactobacillus plantarum subsp. plantarum NC8 GN=nc8_0863 PE=4 SV=1	243	1.38276e-60	41	261	254	92.7	95.3	6	6	6.2	YibE/F	Unknown
AAV43095.1	O31754	9.B.149.2.1	gnl|BL_ORD_ID|6077 gnl|TC-DB|O31754|9.B.149.2.1 Regulator of sigma-W protease RasP OS=Bacillus subtilis (strain 168) GN=rasP PE=1 SV=1	418	1.14412e-92	38	418	422	98.8	98.6	5	4	3.65	M50-P	None
AAV42664.1	Q9K8H6	9.B.157.1.2	gnl|BL_ORD_ID|16279 gnl|TC-DB|Q9K8H6|9.B.157.1.2 Cell shape-determining protein MreC OS=Bacillus halodurans (strain ATCC BAA-125 / DSM 18197 / FERM 7344 / JCM 9153 / C-125) GN=mreC PE=3 SV=1	282	2.05704e-40	32	283	293	98.2	94.5	1	1	0.9	MreBCD	Folic acid
AAV43096.1	WP_102961726	9.B.273.1.2	gnl|BL_ORD_ID|18931 gnl|TC-DB|WP_102961726.1|9.B.273.1.2 phosphatidate cytidylyltransferase [Burkholderia cenocepacia]	283	5.01642e-29	32	271	273	98.5	99.3	8	7	6.4	PCT	None
AAV43080.1	G4NXA5	1.A.33.1.4	gnl|BL_ORD_ID|4272 gnl|TC-DB|G4NXA5|1.A.33.1.4 Chaperone protein DnaK OS=Bacillus subtilis subsp. spizizenii TU-B-10 GN=dnaK PE=3 SV=1	616	0	72	614	611	99.8	99.7	0	0	None	Hsp70	ions
AAV42252.1	Q9ZK21	1.C.82.1.1	gnl|BL_ORD_ID|17436 gnl|TC-DB|Q9ZK21|1.C.82.1.1 50S ribosomal protein L1 - Helicobacter pylori J99 (Campylobacter pylori J99).	216	2.18033e-80	54	230	234	93.5	91.9	0	0	None	HP2-20	small molecules
AAV43155.1	J8IXD8	1.C.109.1.5	gnl|BL_ORD_ID|4937 gnl|TC-DB|J8IXD8|1.C.109.1.5 Hemolysin TlyA family protein OS=Bacillus cereus VD078 GN=III_01305 PE=4 SV=1	242	1.07533e-96	60	270	279	89.3	86	0	0	None	B-Hemolysin A	small molecules
AAV42514.1	WP_097001274	1.C.126.1.3	gnl|BL_ORD_ID|18901 gnl|TC-DB|WP_097001274.1|1.C.126.1.3 CBS domain-containing protein [Francisella tularensis]	265	8.27321e-47	33	287	286	88.9	91.3	0	0	None	HlyC	None
AAV42848.1	P39760	2.A.38.4.4	gnl|BL_ORD_ID|8984 gnl|TC-DB|P39760|2.A.38.4.4 Hypothetical protein ykqB (ORF4) - Bacillus subtilis.	213	1.50357e-55	41	223	221	95.1	95.5	1	0	None	Trk	K+
AAV42334.1	P73948	2.A.38.4.5	gnl|BL_ORD_ID|9979 gnl|TC-DB|P73948|2.A.38.4.5 Slr1508 protein OS=Synechocystis sp. (strain PCC 6803) GN=slr1508 PE=4 SV=1	380	6.00101e-10	27	387	389	93.8	92.5	0	0	None	Trk	K+
AAV43721.1	P39579	2.A.50.2.1	gnl|BL_ORD_ID|8964 gnl|TC-DB|P39579|2.A.50.2.1 D-alanyl carrier protein OS=Bacillus subtilis (strain 168) OX=224308 GN=dltC PE=1 SV=1	78	8.78425e-20	44	79	78	96.2	98.7	0	0	None	GUP	Alanine
AAV43457.1	Q8TZQ3	3.A.1.1.16	gnl|BL_ORD_ID|14964 gnl|TC-DB|Q8TZQ3|3.A.1.1.16 Putative sugar transport ATP-hydrolyzing - Pyrococcus furiosus.	351	1.89987e-85	41	361	370	92.5	93.5	0	0	None	ABC	Maltooligosaccharides
AAV43264.1	Q7WWQ6	3.A.1.1.20	gnl|BL_ORD_ID|13895 gnl|TC-DB|Q7WWQ6|3.A.1.1.20 ATP-binding protein MsmK - Lactobacillus acidophilus.	370	0	73	370	368	99.7	99.7	1	0	None	ABC	Fructooligosaccharides
AAV42389.1	Q7WWQ6	3.A.1.1.20	gnl|BL_ORD_ID|13895 gnl|TC-DB|Q7WWQ6|3.A.1.1.20 ATP-binding protein MsmK - Lactobacillus acidophilus.	368	0	100	368	368	99.7	99.7	0	0	None	ABC	Fructooligosaccharides
AAV43667.1	Q7WWQ6	3.A.1.1.20	gnl|BL_ORD_ID|13895 gnl|TC-DB|Q7WWQ6|3.A.1.1.20 ATP-binding protein MsmK - Lactobacillus acidophilus.	368	0	85	368	368	99.7	99.7	0	0	None	ABC	Fructooligosaccharides
AAV43739.1	A2RKA7	3.A.1.2.17	gnl|BL_ORD_ID|365 gnl|TC-DB|A2RKA7|3.A.1.2.17 Purine/cytidine ABC transporter ATP-binding protein OS=Lactococcus lactis subsp. cremoris (strain MG1363) GN=nupA PE=4 SV=1	499	0	60	512	506	97.3	98.4	0	0	None	ABC	Nucleosides
AAV43303.1	G4FGN3	3.A.1.2.20	gnl|BL_ORD_ID|4256 gnl|TC-DB|G4FGN3|3.A.1.2.20 Monosaccharide-transporting ATPase OS=Thermotoga maritima (strain ATCC 43589 / MSB8 / DSM 3109 / JCM 10099) GN=ThemaDRAFT_1375 PE=3 SV=1	488	4.29149e-153	46	492	494	99	98.6	0	0	None	ABC	Xylose, glucose
AAV43485.1	P10346	3.A.1.3.2	gnl|BL_ORD_ID|7758 gnl|TC-DB|P10346|3.A.1.3.2 Glutamine transport ATP-binding protein glnQ - Escherichia coli.	207	4.3098e-60	46	206	240	95.6	85.8	0	1	None	ABC	Glutamine
AAV42891.1	P48243	3.A.1.3.9	gnl|BL_ORD_ID|9362 gnl|TC-DB|P48243|3.A.1.3.9 Glutamate transport ATP-binding protein gluA - Corynebacterium glutamicum (Brevibacterium flavum).	237	2.05663e-79	50	246	242	95.9	97.1	0	0	None	ABC	glutamate
AAV42012.1	Q9A1H1	3.A.1.3.20	gnl|BL_ORD_ID|15707 gnl|TC-DB|Q9A1H1|3.A.1.3.20 Amino acid transport ATP-binding protein OS=Streptococcus pyogenes serotype M1 GN=M5005_Spy0235 PE=4 SV=1	245	7.74444e-106	61	251	246	96.8	99.2	0	0	None	ABC	lysine
AAV42036.1	Q9F3K7	3.A.1.3.24	gnl|BL_ORD_ID|15925 gnl|TC-DB|Q9F3K7|3.A.1.3.24 ATP-binding protein OS=Streptomyces coelicolor (strain ATCC BAA-471 / A3(2) / M145) GN=SCO5258 PE=3 SV=1	253	1.67214e-95	57	245	253	99.6	99.6	0	0	None	ABC	Amino acids
AAV42459.1	Q9CES4	3.A.1.3.25	gnl|BL_ORD_ID|15848 gnl|TC-DB|Q9CES4|3.A.1.3.25 Glutamine ABC transporter ATP-binding protein OS=Lactococcus lactis subsp. lactis (strain IL1403) GN=glnQ PE=3 SV=1	240	4.68535e-94	57	246	247	97.2	96.8	0	0	None	ABC	glutamate, Asparagine, Glutamine
AAV42098.1	Q2FZR4	3.A.1.5.19	gnl|BL_ORD_ID|11644 gnl|TC-DB|Q2FZR4|3.A.1.5.19 Oligopeptide ABC transporter, ATP-binding protein, putative - Staphylococcus aureus (strain NCTC 8325).	308	1.23973e-141	62	314	313	97.5	97.4	0	0	None	ABC	Oligopeptides
AAV42097.1	Q9CIK9	3.A.1.5.25	gnl|BL_ORD_ID|15855 gnl|TC-DB|Q9CIK9|3.A.1.5.25 Oligopeptide ABC trasporter ATP binding protein OS=Lactococcus lactis subsp. lactis GN=optD PE=4 SV=1	346	4.09276e-175	69	352	349	97.2	98.9	1	0	None	ABC	Oligopeptides, peptides
AAV43174.1	Q9CIL2	3.A.1.5.25	gnl|BL_ORD_ID|15858 gnl|TC-DB|Q9CIL2|3.A.1.5.25 Oligopeptide ABC transporter substrate binding protein OS=Lactococcus lactis subsp. lactis GN=optA PE=4 SV=1	184	1.35005e-43	43	184	545	99.5	33.4	0	1	None	ABC	Oligopeptides, peptides
AAV43173.1	Q9CIL2	3.A.1.5.25	gnl|BL_ORD_ID|15858 gnl|TC-DB|Q9CIL2|3.A.1.5.25 Oligopeptide ABC transporter substrate binding protein OS=Lactococcus lactis subsp. lactis GN=optA PE=4 SV=1	112	1.45447e-11	36	123	545	88.6	19.3	0	1	None	ABC	Oligopeptides, peptides
AAV43134.1	F0TFS9	3.A.1.5.32	gnl|BL_ORD_ID|3694 gnl|TC-DB|F0TFS9|3.A.1.5.32 Oligopeptide ABC transporter ATP-binding protein OS=Lactobacillus acidophilus (strain 30SC) GN=LAC30SC_07305 PE=3 SV=1	328	0	95	328	328	99.7	99.7	0	0	None	ABC	Alpha-galactosides
AAV43135.1	F0TFT0	3.A.1.5.32	gnl|BL_ORD_ID|3695 gnl|TC-DB|F0TFT0|3.A.1.5.32 Oligopeptide ABC transporter OS=Lactobacillus acidophilus (strain 30SC) GN=LAC30SC_07310 PE=4 SV=1	343	0	95	343	342	99.7	99.7	0	0	None	ABC	Alpha-galactosides
AAV42257.1	O51236	3.A.1.7.5	gnl|BL_ORD_ID|6281 gnl|TC-DB|O51236|3.A.1.7.5 Phosphate import ATP-binding protein PstB OS=Borrelia burgdorferi (strain ATCC 35210 / B31 / CIP 102532 / DSM 4680) GN=pstB PE=3 SV=1	250	1.44433e-104	56	251	260	99.2	95.8	0	0	None	ABC	phosphate
AAV42256.1	O51236	3.A.1.7.5	gnl|BL_ORD_ID|6281 gnl|TC-DB|O51236|3.A.1.7.5 Phosphate import ATP-binding protein PstB OS=Borrelia burgdorferi (strain ATCC 35210 / B31 / CIP 102532 / DSM 4680) GN=pstB PE=3 SV=1	257	3.91226e-91	54	265	260	95.8	98.1	0	0	None	ABC	phosphate
AAV42583.1	Q97Q42	3.A.1.11.7	gnl|BL_ORD_ID|15588 gnl|TC-DB|Q97Q42|3.A.1.11.7 Spermidine/putrescine import ATP-binding protein PotA OS=Streptococcus pneumoniae serotype 4 (strain ATCC BAA-334 / TIGR4) GN=potA PE=3 SV=1	364	2.53535e-157	61	365	385	99.2	94.3	0	0	None	ABC	Spermidine, Putrescine
AAV42762.1	Q04MS6	3.A.1.24.6	gnl|BL_ORD_ID|10691 gnl|TC-DB|Q04MS6|3.A.1.24.6 ABC transporter, ATP-binding protein OS=Streptococcus pneumoniae serotype 2 (strain D39 / NCTC 7466) GN=SPD_0153 PE=3 SV=1	344	6.27343e-110	52	353	353	96	96.6	0	0	None	ABC	peptides
AAV42211.1	Q03PY5	3.A.1.26.9	gnl|BL_ORD_ID|10644 gnl|TC-DB|Q03PY5|3.A.1.26.9 Energy-coupling factor transporter ATP-binding protein EcfA1 OS=Lactobacillus brevis (strain ATCC 367 / JCM 1170) GN=ecfA1 PE=3 SV=1	274	8.00986e-100	51	283	279	96.5	96.8	0	0	None	ABC	folate
AAV42212.1	Q839D4	3.A.1.26.10	gnl|BL_ORD_ID|14009 gnl|TC-DB|Q839D4|3.A.1.26.10 Cobalt import ATP-binding protein CbiO 2 OS=Enterococcus faecalis GN=cbiO2 PE=3 SV=2	283	8.39576e-105	53	285	289	97.9	97.6	0	0	None	ABC	Folic acid
AAV42778.1	Q74I62	3.A.1.29.1	gnl|BL_ORD_ID|13589 gnl|TC-DB|Q74I62|3.A.1.29.1 Putative ABC transporter ATP-binding protein LJ_1704 OS=Lactobacillus johnsonii GN=LJ_1704 PE=3 SV=1	564	0	74	566	573	99.5	98.3	0	0	None	ABC	Methionine precursors
AAV41995.1	Q97RS3	3.A.1.30.2	gnl|BL_ORD_ID|15594 gnl|TC-DB|Q97RS3|3.A.1.30.2 ABC transporter, ATP-binding protein OS=Streptococcus pneumoniae serotype 4 (strain ATCC BAA-334 / TIGR4) GN=SP_0720 PE=3 SV=1	430	1.07189e-61	32	449	461	93.3	90	0	0	None	ABC	thiamin
AAV41951.1	Q99ZY3	3.A.1.34.1	gnl|BL_ORD_ID|15695 gnl|TC-DB|Q99ZY3|3.A.1.34.1 Putative ABC transporter (ATP-binding protein) OS=Streptococcus pyogenes serotype M1 GN=SPy_1019 PE=4 SV=1	251	1.70269e-82	50	253	252	98.8	99.2	0	1	None	ABC	tryptophan
AAV43083.1	P39115	3.A.1.121.3	gnl|BL_ORD_ID|8924 gnl|TC-DB|P39115|3.A.1.121.3 Nucleotide binding protein expZ - Bacillus subtilis.	502	5.30709e-58	28	503	547	98.2	86.3	0	0	None	ABC	Virginiamymycin, Lincomycin
AAV42139.1	KRO08310	3.A.1.130.3	gnl|BL_ORD_ID|5290 gnl|TC-DB|KRO08310|3.A.1.130.3 ABC transporter ATP-binding protein [Lactobacillus hokkaidonensis]	289	8.10863e-87	47	284	287	99.6	99.7	0	0	None	ABC	None
AAV43024.1	Q99ZC8	3.A.1.132.6	gnl|BL_ORD_ID|15694 gnl|TC-DB|Q99ZC8|3.A.1.132.6 ABC transporter ATP-binding protein OS=Streptococcus pyogenes serotype M1 GN=M5005_Spy0992 PE=4 SV=1	230	1.65573e-43	32	235	232	97	98.7	0	0	None	ABC	Unknown
AAV43492.1	Q8Y5F0	3.A.1.134.12	gnl|BL_ORD_ID|15128 gnl|TC-DB|Q8Y5F0|3.A.1.134.12 Lmo2114 protein OS=Listeria monocytogenes serovar 1/2a (strain ATCC BAA-679 / EGD-e) GN=lmo2114 PE=4 SV=1	242	4.59714e-87	51	249	255	96.8	94.1	0	0	None	ABC	Beta-lactam antibiotics, Nisin, Gallidermin, Bacitracin
AAV43711.1	Q6MGV5	3.A.1.137.2	gnl|BL_ORD_ID|13198 gnl|TC-DB|Q6MGV5|3.A.1.137.2 ABC-type anti-microbial peptide transporter, ATP-binding protein OS=Bdellovibrio bacteriovorus (strain ATCC 15356 / DSM 50701 / NCIB 9529 / HD100) GN=Bd3816 PE=4 SV=1	227	4.71982e-76	50	233	237	97	95.4	0	1	None	ABC	Antimicrobial peptides
AAV43318.1	P77279	3.A.1.139.2	gnl|BL_ORD_ID|10103 gnl|TC-DB|P77279|3.A.1.139.2 Probable iron export ATP-binding protein FetA OS=Escherichia coli (strain K12) GN=fetA PE=1 SV=1	204	2.9604e-60	46	218	225	92.7	90.2	0	0	None	ABC	Fe2+
AAV43401.1	P55339	3.A.1.143.1	gnl|BL_ORD_ID|9633 gnl|TC-DB|P55339|3.A.1.143.1 ABC-type transporter ATP-binding protein EcsA OS=Bacillus subtilis (strain 168) GN=ecsA PE=1 SV=1	244	3.54216e-84	49	247	247	98.4	98	0	0	None	ABC	proteins
AAV42288.1	ANC59923	3.A.1.211.25	gnl|BL_ORD_ID|1278 gnl|TC-DB|ANC59923.1|3.A.1.211.25 OptrA [Enterococcus faecalis]	639	2.62187e-121	33	639	639	97.5	97.5	0	0	None	ABC	None
AAV43570.1	ANC59923	3.A.1.211.25	gnl|BL_ORD_ID|1278 gnl|TC-DB|ANC59923.1|3.A.1.211.25 OptrA [Enterococcus faecalis]	500	8.38688e-80	32	513	639	94.2	77.8	0	0	None	ABC	None
AAV42643.1	P0ABA6	3.A.2.1.1	gnl|BL_ORD_ID|7492 gnl|TC-DB|P0ABA6|3.A.2.1.1 ATP synthase gamma chain - Escherichia coli.	317	1.42948e-47	31	320	287	98.8	99.3	0	0	None	F-ATPase	H+
AAV42644.1	P50002	3.A.2.1.5	gnl|BL_ORD_ID|9431 gnl|TC-DB|P50002|3.A.2.1.5 ATP synthase subunit beta, sodium ion specific OS=Acetobacterium woodii (strain ATCC 29683 / DSM 1030 / JCM 2381 / KCTC 1655) GN=atpD PE=1 SV=3	461	0	70	479	466	96	98.3	0	0	None	F-ATPase	Na+
AAV42641.1	Q9RMB3	3.A.2.1.5	gnl|BL_ORD_ID|16758 gnl|TC-DB|Q9RMB3|3.A.2.1.5 ATP synthase subunit delta OS=Acetobacterium woodii GN=atpH PE=3 SV=1	172	7.09389e-30	33	182	180	93.4	94.4	0	0	None	F-ATPase	Na+
AAV42642.1	BAK19946	3.A.2.1.10	gnl|BL_ORD_ID|2056 gnl|TC-DB|BAK19946|3.A.2.1.10 ApH+ATPase alpha subunit [Aphanothece halophytica]	503	0	59	503	505	99.4	99.4	0	0	None	F-ATPase	protons, H+
AAV42645.1	BAK19949	3.A.2.1.10	gnl|BL_ORD_ID|2059 gnl|TC-DB|BAK19949|3.A.2.1.10 ApH+ATPase epsilon subunit [Aphanothece halophytica]	129	2.25705e-17	32	146	138	87.7	89.9	0	0	None	F-ATPase	protons, H+
AAV43125.1	P10121	3.A.5.1.1	gnl|BL_ORD_ID|7749 gnl|TC-DB|P10121|3.A.5.1.1 CELL DIVISION PROTEIN FTSY - Escherichia coli.	425	3.78676e-85	39	431	497	91.9	83.9	0	0	None	Sec	proteins
AAV42549.1	Q6MR29	3.A.5.1.3	gnl|BL_ORD_ID|13260 gnl|TC-DB|Q6MR29|3.A.5.1.3 Protein translocase subunit SecA OS=Bdellovibrio bacteriovorus (strain ATCC 15356 / DSM 50701 / NCIB 9529 / HD100) GN=secA PE=3 SV=1	832	0	47	799	889	99.1	91.1	1	0	None	Sec	proteins
AAV43120.1	P66844	3.A.5.2.2	gnl|BL_ORD_ID|9845 gnl|TC-DB|P66844|3.A.5.2.2 Signal recognition particle protein OS=Mycobacterium tuberculosis GN=ffh PE=3 SV=1	473	2.18431e-143	50	476	525	97.1	88.2	0	0	None	Sec	proteins
AAV42832.1	Q07711	3.A.7.7.1	gnl|BL_ORD_ID|10782 gnl|TC-DB|Q07711|3.A.7.7.1 DNA topoisomerase I (EC 5.99.1.2) (Omega-protein) (Relaxing enzyme) (Untwisting enzyme) (Swivelase) - Staphylococcus aureus.	636	3.24869e-36	24	705	700	84.4	80.6	0	0	None	IVSP	DNA
AAV43629.1	Q5EP68	3.A.7.11.1	gnl|BL_ORD_ID|12663 gnl|TC-DB|Q5EP68|3.A.7.11.1 ParA - Neisseria gonorrhoeae.	239	1.53345e-15	28	259	295	86.9	80.3	0	1	None	IVSP	DNA
AAV42221.1	Q15HV3	3.A.7.14.2	gnl|BL_ORD_ID|11215 gnl|TC-DB|Q15HV3|3.A.7.14.2 TcpA - Clostridium perfringens.	236	1.37896e-06	25	358	532	60.6	41.4	0	4	None	IVSP	DNA
AAV41931.1	Q15HV3	3.A.7.14.2	gnl|BL_ORD_ID|11215 gnl|TC-DB|Q15HV3|3.A.7.14.2 TcpA - Clostridium perfringens.	230	5.64728e-06	25	358	532	60.6	41.4	0	4	None	IVSP	DNA
AAV42687.1	Q6MDD6	3.A.7.16.1	gnl|BL_ORD_ID|13186 gnl|TC-DB|Q6MDD6|3.A.7.16.1 Putative exodeoxyribonuclease V OS=Protochlamydia amoebophila (strain UWE25) GN=recD PE=4 SV=1	733	6.31935e-121	34	784	721	90.9	97.2	0	0	None	IVSP	DNA
AAV41916.1	Q5G3M3	3.A.7.19.1	gnl|BL_ORD_ID|12694 gnl|TC-DB|Q5G3M3|3.A.7.19.1 Single-stranded DNA-binding protein OS=Enterococcus faecalis GN=pcfS PE=3 SV=1	173	9.47081e-53	50	172	150	99.4	99.3	0	0	None	IVSP	DNA
AAV42176.1	Q9FI56	3.A.9.1.2	gnl|BL_ORD_ID|15971 gnl|TC-DB|Q9FI56|3.A.9.1.2 Chaperone protein ClpC1, chloroplastic OS=Arabidopsis thaliana GN=CLPC1 PE=1 SV=1	812	0	48	825	929	97	86.2	0	0	None	CEPT or Tic-Toc	proteins
AAV43708.1	Q9FI56	3.A.9.1.2	gnl|BL_ORD_ID|15971 gnl|TC-DB|Q9FI56|3.A.9.1.2 Chaperone protein ClpC1, chloroplastic OS=Arabidopsis thaliana GN=CLPC1 PE=1 SV=1	688	0	44	709	929	91.5	72.6	1	0	None	CEPT or Tic-Toc	proteins
AAV42517.1	Q9FI56	3.A.9.1.2	gnl|BL_ORD_ID|15971 gnl|TC-DB|Q9FI56|3.A.9.1.2 Chaperone protein ClpC1, chloroplastic OS=Arabidopsis thaliana GN=CLPC1 PE=1 SV=1	650	0	50	728	929	85.9	69.8	0	0	None	CEPT or Tic-Toc	proteins
AAV42546.1	Q8CWM9	3.A.11.1.2	gnl|BL_ORD_ID|14227 gnl|TC-DB|Q8CWM9|3.A.11.1.2 Involved in transformation; required for DNA uptake but not for binding; Related to ATP-dependent RNA/DNA helicases - Streptococcus pneumoniae (strain ATCC BAA-255 / R6).	402	1.30718e-96	43	427	432	91.6	89.8	0	0	None	DNA-T	ssDNA
AAV42105.1	G2JTB4	3.A.11.1.4	gnl|BL_ORD_ID|4202 gnl|TC-DB|G2JTB4|3.A.11.1.4 ComE operon protein 2 OS=Listeria monocytogenes J0161 GN=LMOG_00216 PE=3 SV=1	145	8.75995e-58	53	159	186	90.6	77.4	0	0	None	DNA-T	ssDNA
AAV42547.1	G2JSZ8	3.A.11.1.4	gnl|BL_ORD_ID|4200 gnl|TC-DB|G2JSZ8|3.A.11.1.4 Competence protein ComFC OS=Listeria monocytogenes J0161 GN=LMOG_02351 PE=4 SV=1	219	4.41389e-21	32	231	218	93.5	93.6	0	0	None	DNA-T	ssDNA
AAV43138.1	AKM80112	3.A.11.1.5	gnl|BL_ORD_ID|1201 gnl|TC-DB|AKM80112|3.A.11.1.5 putative ATP-dependent DNA helicase [Candidatus Saccharibacteria bacterium GW2011_GWC2_44_17]	675	6.59015e-138	38	678	676	97.9	98.5	0	0	None	DNA-T	None
AAV42831.1	AKM80915	3.A.11.1.5	gnl|BL_ORD_ID|1237 gnl|TC-DB|AKM80915.1|3.A.11.1.5 hypothetical protein UW38_C0001G1085 [Candidatus Saccharibacteria bacterium GW2011_GWC2_44_17]	181	1.79153e-40	45	285	285	62.8	63.2	0	0	None	DNA-T	None
AAV42603.1	P25953	3.A.14.1.1	gnl|BL_ORD_ID|8297 gnl|TC-DB|P25953|3.A.14.1.1 COMG OPERON PROTEIN 1 - Bacillus subtilis.	272	1.11687e-56	39	324	356	81.5	75.8	0	0	None	FPE	proteins
AAV42160.1	P38919	3.A.18.1.1	gnl|BL_ORD_ID|8907 gnl|TC-DB|P38919|3.A.18.1.1 Eukaryotic initiation factor 4A-III - Homo sapiens (Human).	356	3.18579e-92	41	495	411	71.5	86.1	0	0	None	3.A.18	mRNA
AAV42573.1	B3ET62	3.A.23.6.1	gnl|BL_ORD_ID|1640 gnl|TC-DB|B3ET62|3.A.23.6.1 Glyceraldehyde-3-phosphate dehydrogenase OS=Amoebophilus asiaticus (strain 5a2) GN=Aasi_1069 PE=3 SV=1	323	1.98531e-91	48	338	331	94.1	94	0	0	None	T6SS	None
AAV43039.1	B3ERW3	3.A.23.6.1	gnl|BL_ORD_ID|1638 gnl|TC-DB|B3ERW3|3.A.23.6.1 Uncharacterized protein OS=Amoebophilus asiaticus (strain 5a2) GN=Aasi_0564 PE=4 SV=1	307	7.23322e-77	41	319	314	92.5	93.3	0	0	None	T6SS	None
AAV43136.1	O80800	3.D.1.6.3	gnl|BL_ORD_ID|6551 gnl|TC-DB|O80800|3.D.1.6.3 Acyl carrier protein - Arabidopsis thaliana (Mouse-ear cress).	78	1.78899e-18	41	80	126	96.2	61.1	0	0	None	NDH	H+
AAV42970.1	F4K2G0	3.D.1.8.1	gnl|BL_ORD_ID|3840 gnl|TC-DB|F4K2G0|3.D.1.8.1 Peptidyl-prolyl cis-trans isomerase OS=Arabidopsis thaliana GN=CYP20-2 PE=3 SV=1	169	5.53821e-36	45	199	255	82.4	55.3	0	0	None	NDH	H+
AAV42736.1	P46319	4.A.3.2.2	gnl|BL_ORD_ID|9294 gnl|TC-DB|P46319|4.A.3.2.2 PTS SYSTEM, CELLOBIOSE-SPECIFIC IIA COMPONENT (EIIA-CEL) (CELLOBIOSE- PERMEASE IIA COMPONENT) (PHOSPHOTRANSFERASE ENZYME II, A COMPONENT) (EC 2.7.1.69) (EIII-CEL) - Bacillus subtilis.	91	1.03381e-28	51	123	110	73.2	81.8	0	0	None	Lac	Lichenan oligosaccharides
AAV42735.1	Q9CIF0	4.A.3.2.4	gnl|BL_ORD_ID|15853 gnl|TC-DB|Q9CIF0|4.A.3.2.4 Cellobiose-specific PTS system IIB component - Lactococcus lactis subsp. lactis (Streptococcus lactis).	112	1.55339e-29	51	111	108	97.3	98.1	0	0	None	Lac	Cellobiose
AAV42047.1	C9MZ76	4.A.5.1.6	gnl|BL_ORD_ID|2521 gnl|TC-DB|C9MZ76|4.A.5.1.6 Phosphoenolpyruvate-dependent sugar phosphotransferase system, EIIA 2 OS=Leptotrichia hofstadii F0254 GN=GCWU000323_01873 PE=4 SV=1	161	2.87939e-19	35	162	151	95.7	98.7	0	0	None	Gat	Galactitol
AAV43496.1	V2QAC2	4.A.6.3.1	gnl|BL_ORD_ID|18035 gnl|TC-DB|V2QAC2|4.A.6.3.1 Uncharacterized protein OS=Mucispirillum schaedleri ASF457 GN=N508_01372 PE=4 SV=1	127	1.0027e-12	31	130	133	94.6	93.2	0	0	None	Man	Unknown
AAV43547.1	P39851	8.A.3.2.1	gnl|BL_ORD_ID|8998 gnl|TC-DB|P39851|8.A.3.2.1 CAPB protein - Staphylococcus aureus.	214	1.02835e-53	43	260	228	81.5	92.1	1	0	None	MPA1-C or MPA1+C	NONE
AAV42876.1	P80874	8.A.5.1.4	gnl|BL_ORD_ID|10186 gnl|TC-DB|P80874|8.A.5.1.4 General stress protein 69 OS=Bacillus subtilis (strain 168) GN=yhdN PE=1 SV=2	337	3.85589e-25	26	285	331	99.6	97	0	0	None	KTN	NONE
AAV43742.1	P80874	8.A.5.1.4	gnl|BL_ORD_ID|10186 gnl|TC-DB|P80874|8.A.5.1.4 General stress protein 69 OS=Bacillus subtilis (strain 168) GN=yhdN PE=1 SV=2	193	2.10658e-23	37	275	331	65.1	57.1	0	0	None	KTN	NONE
AAV42874.1	P80874	8.A.5.1.4	gnl|BL_ORD_ID|10186 gnl|TC-DB|P80874|8.A.5.1.4 General stress protein 69 OS=Bacillus subtilis (strain 168) GN=yhdN PE=1 SV=2	142	6.78736e-14	37	286	331	42.3	42.3	0	0	None	KTN	NONE
AAV42519.1	P08839	8.A.7.1.1	gnl|BL_ORD_ID|7300 gnl|TC-DB|P08839|8.A.7.1.1 PHOSPHOENOLPYRUVATE-PROTEIN PHOSPHOTRANSFERASE (EC 2.7.3.9) (PHOSPHOTRANSFERASE SYSTEM, ENZYME I) - Escherichia coli.	572	0	49	577	575	98.6	99	0	0	None	EI	NONE
AAV42518.1	H1XXZ0	8.A.8.1.5	gnl|BL_ORD_ID|4509 gnl|TC-DB|H1XXZ0|8.A.8.1.5 Phosphotransferase system, phosphocarrier protein HPr OS=Caldithrix abyssi DSM 13497 GN=Calab_1239 PE=4 SV=1	70	7.21504e-16	44	88	89	78.4	77.5	0	0	None	HPr	NONE
AAV42709.1	OLS24375	9.A.8.1.17	gnl|BL_ORD_ID|6924 gnl|TC-DB|OLS24375|9.A.8.1.17 putative GTP-binding protein EngB [Candidatus Thorarchaeota archaeon AB_25]	156	2.48812e-12	31	196	208	70.9	71.6	0	0	None	FeoB	None
AAV42663.1	Q01465	9.B.157.1.1	gnl|BL_ORD_ID|10509 gnl|TC-DB|Q01465|9.B.157.1.1 Rod shape-determining protein MreB OS=Bacillus subtilis (strain 168) GN=mreB PE=3 SV=3	335	2.60099e-154	64	334	337	98.5	98.5	0	1	None	MreBCD	Folic acid
AAV42646.1	Q01465	9.B.157.1.1	gnl|BL_ORD_ID|10509 gnl|TC-DB|Q01465|9.B.157.1.1 Rod shape-determining protein MreB OS=Bacillus subtilis (strain 168) GN=mreB PE=3 SV=3	324	2.33581e-127	55	329	337	97.6	95.8	0	1	None	MreBCD	Folic acid
AAV42451.1	Q83XH1	9.B.325.1.1	gnl|BL_ORD_ID|14016 gnl|TC-DB|Q83XH1|9.B.325.1.1 ABC transporter - Clostridium hathewayi.	538	0	59	541	546	98.9	97.6	0	0	None	ABC4	None
AAV43761.1	TET83512	9.B.354.2.2	gnl|BL_ORD_ID|17911 gnl|TC-DB|TET83512.1|9.B.354.2.2 TIGR00266 family protein [Anaerolineales bacterium]	222	2.4734e-24	35	237	254	90.3	82.3	0	0	None	P24CP	None

## Sheet: Brevis
Query ID	Hit ID	Hit TCID	Hit Description	Match Len	e-Val	% Identity	Query Length	Hit Length	Query Coverage	Hit Coverage	Query TMS#	Hit TMS#	TM-Overlap Score	Family Abrv.	Predicted Substrate
ABJ63359.1	Q8Y5K1	1.A.1.17.2	gnl|BL_ORD_ID|15129 gnl|TC-DB|Q8Y5K1|1.A.1.17.2 Lmo2059 protein OS=Listeria monocytogenes GN=lmo2059 PE=4 SV=1	206	7.01637e-28	33	251	247	80.5	78.9	5	6	4.4	VIC	K+
ABJ64696.1	D7V7W8	1.A.8.2.5	gnl|BL_ORD_ID|3103 gnl|TC-DB|D7V7W8|1.A.8.2.5 MIP family glycerol uptake facilitator protein GlpF OS=Lactobacillus plantarum subsp. plantarum ATCC 14917 GN=glpF2 PE=3 SV=1	234	1.92589e-125	68	235	235	99.1	99.1	6	6	5.35	MIP	water, Dihydroxyacetone, glycerol
ABJ64916.1	D7VEY8	1.A.8.2.7	gnl|BL_ORD_ID|3106 gnl|TC-DB|D7VEY8|1.A.8.2.7 MIP family glycerol uptake facilitator protein GlpF OS=Lactobacillus plantarum subsp. plantarum ATCC 14917 GN=glpF4 PE=3 SV=1	241	3.96168e-87	53	240	250	96.2	96	6	6	4.3	MIP	water, Dihydroxyacetone, glycerol
ABJ65051.1	D7VF10	1.A.8.13.3	gnl|BL_ORD_ID|3107 gnl|TC-DB|D7VF10|1.A.8.13.3 MIP family glycerol uptake facilitator protein GlpF OS=Lactobacillus plantarum subsp. plantarum ATCC 14917 GN=glpF5 PE=3 SV=1	216	1.04284e-122	81	216	216	99.5	99.5	6	6	5.7	MIP	water, glycerol, Dihydroxyacetone
ABJ63987.1	O66515	1.A.11.1.5	gnl|BL_ORD_ID|6429 gnl|TC-DB|O66515|1.A.11.1.5 Ammonia channel OS=Aquifex aeolicus (strain VF5) GN=amt PE=1 SV=1	405	3.72831e-111	46	448	423	89.7	93.4	11	12	10.9	Amt	ammonia
ABJ64178.1	A3CPR5	1.A.14.2.6	gnl|BL_ORD_ID|391 gnl|TC-DB|A3CPR5|1.A.14.2.6 Integral membrane protein, possible receptor, putative OS=Streptococcus sanguinis (strain SK36) GN=SSA_1788 PE=4 SV=1	220	9.73726e-41	38	234	227	91.9	96	7	7	5.8	CaTA	Unknown
ABJ63866.1	P94585	1.A.22.1.3	gnl|BL_ORD_ID|10317 gnl|TC-DB|P94585|1.A.22.1.3 Large-conductance mechanosensitive channel - Bacillus subtilis.	125	2.3963e-37	52	127	130	95.3	94.6	2	2	1.95	MscL	ions, Osmolytes
ABJ64313.1	O34897	1.A.23.3.1	gnl|BL_ORD_ID|6159 gnl|TC-DB|O34897|1.A.23.3.1 YKUT PROTEIN - Bacillus subtilis.	247	9.70745e-49	35	293	267	84	91.4	2	2	1.45	MscS	Osmolytes
ABJ63478.1	A3CLT2	1.A.35.3.4	gnl|BL_ORD_ID|390 gnl|TC-DB|A3CLT2|1.A.35.3.4 Cation transporter CorA family, putative OS=Streptococcus sanguinis (strain SK36) GN=SSA_0701 PE=4 SV=1	302	2.28636e-49	30	305	302	98	97.7	3	3	2.15	MIT	Mg2+
ABJ63503.1	F6CB17	1.A.43.1.14	gnl|BL_ORD_ID|3899 gnl|TC-DB|F6CB17|1.A.43.1.14 Putative fluoride ion transporter CrcB OS=Lactobacillus kefiranofaciens (strain ZW3) GN=crcB PE=3 SV=1	124	3.26149e-21	41	118	124	94.9	95.2	3	4	2.25	Fluc	Fl-
ABJ63502.1	Q7VYU0	1.A.43.1.17	gnl|BL_ORD_ID|13879 gnl|TC-DB|Q7VYU0|1.A.43.1.17 Putative fluoride ion transporter CrcB OS=Bordetella pertussis (strain Tohama I / ATCC BAA-589 / NCTC 13251) GN=crcB PE=1 SV=1	115	9.55128e-16	37	130	128	87.7	88.3	4	4	3.7	Fluc	fluoride ions
ABJ63281.1	T1Y8N2	1.A.112.2.10	gnl|BL_ORD_ID|17867 gnl|TC-DB|T1Y8N2|1.A.112.2.10 Magnesium and cobalt efflux protein corC OS=Staphylococcus aureus subsp. aureus CN1 OX=1193576 GN=SAKOR_00699 PE=4 SV=1	447	8.43009e-80	32	451	449	98.4	98	4	4	3.55	CNNM	None
ABJ63929.1	P54176	1.C.113.1.1	gnl|BL_ORD_ID|9577 gnl|TC-DB|P54176|1.C.113.1.1 HEMOLYSIN III (HLY-III) - Bacillus cereus.	213	6.82961e-69	46	213	219	99.1	96.8	6	7	5.05	Hly III	small molecules
ABJ63766.1	D2EIF4	1.E.14.1.8	gnl|BL_ORD_ID|2724 gnl|TC-DB|D2EIF4|1.E.14.1.8 Holin protein OS=Pediococcus acidilactici 7_4 GN=HMPREF9024_00624 PE=4 SV=1	124	5.66527e-54	67	146	136	84.2	90.4	4	4	3.95	CidA/LrgA Holin	endolysin
ABJ64205.1	Q03RG7	1.E.26.1.11	gnl|BL_ORD_ID|10649 gnl|TC-DB|Q03RG7|1.E.26.1.11 Uncharacterized protein OS=Lactobacillus brevis (strain ATCC 367 / JCM 1170) GN=LVIS_1073 PE=4 SV=1	172	4.04257e-119	100	172	172	99.4	99.4	1	1	0.95	Holin LLH	Unknown
ABJ63785.1	K0J6Q4	1.E.40.3.4	gnl|BL_ORD_ID|4987 gnl|TC-DB|K0J6Q4|1.E.40.3.4 Uncharacterized protein OS=Amphibacillus xylanus NBRC 15112 GN=AXY_06810 PE=4 SV=1	111	1.27366e-26	48	123	120	89.4	84.2	4	4	3.8	MP4 Holin	endolysin
ABJ65273.1	J8Z3M3	1.E.43.1.9	gnl|BL_ORD_ID|4942 gnl|TC-DB|J8Z3M3|1.E.43.1.9 Uncharacterized protein OS=Bacillus cereus HD73 PE=4 SV=1	81	3.10752e-24	53	83	82	96.4	97.6	3	3	2.7	T-A Hol	endolysin
ABJ65073.1	J8Z3M3	1.E.43.1.9	gnl|BL_ORD_ID|4942 gnl|TC-DB|J8Z3M3|1.E.43.1.9 Uncharacterized protein OS=Bacillus cereus HD73 PE=4 SV=1	75	5.54266e-23	53	85	82	87.1	90.2	3	3	2.7	T-A Hol	endolysin
ABJ64693.1	C0Q1N6	1.S.2.1.2	gnl|BL_ORD_ID|2112 gnl|TC-DB|C0Q1N6|1.S.2.1.2 Propanediol utilization: polyhedral bodies OS=Salmonella paratyphi C (strain RKS4594) OX=476213 GN=pudB PE=4 SV=1	228	7.28611e-99	64	238	270	95.4	83.7	1	1	0	BMC-SP2	None
ABJ63352.1	O52733	2.A.1.1.41	gnl|BL_ORD_ID|6299 gnl|TC-DB|O52733|2.A.1.1.41 D-xylose-proton symporter - Lactobacillus brevis.	405	0	98	405	457	99.8	88.4	10	12	9.85	MFS	Xylose
ABJ65246.1	Q8G3X1	2.A.1.1.42	gnl|BL_ORD_ID|14407 gnl|TC-DB|Q8G3X1|2.A.1.1.42 D-Glucose-proton symporter - Bifidobacterium longum.	417	0	73	420	517	98.6	80.5	11	12	10.95	MFS	D-glucose, H+
ABJ64810.1	C4B4V9	2.A.1.1.116	gnl|BL_ORD_ID|2242 gnl|TC-DB|C4B4V9|2.A.1.1.116 L-arabinose transporter OS=Corynebacterium glutamicum GN=araE PE=3 SV=1	454	0	71	465	479	97.2	94.6	12	12	12.3	MFS	Arabinose, Xylose
ABJ63514.1	P25744	2.A.1.2.20	gnl|BL_ORD_ID|8291 gnl|TC-DB|P25744|2.A.1.2.20 Hypothetical transport protein yceE - Escherichia coli.	387	1.12077e-123	44	411	408	93.9	94.6	12	12	11.65	MFS	fosfomycin, Fluoroquinolones
ABJ63464.1	P25744	2.A.1.2.20	gnl|BL_ORD_ID|8291 gnl|TC-DB|P25744|2.A.1.2.20 Hypothetical transport protein yceE - Escherichia coli.	385	4.41097e-120	45	409	408	93.9	93.9	12	12	10.85	MFS	fosfomycin, Fluoroquinolones
ABJ65035.1	Q797E3	2.A.1.2.25	gnl|BL_ORD_ID|13616 gnl|TC-DB|Q797E3|2.A.1.2.25 2.A.1.2.25 Purine efflux pump pbuE	385	7.71161e-47	30	394	388	95.2	96.9	12	12	11.55	MFS	Inosine, Adenosine, Guanosine, Adenine, 2-fluoroadenine, guanine, Hypoxanthine
ABJ65063.1	Q9KMQ3	2.A.1.2.42	gnl|BL_ORD_ID|16314 gnl|TC-DB|Q9KMQ3|2.A.1.2.42 Multidrug resistance protein D OS=Vibrio cholerae GN=VC_A0267 PE=4 SV=1	369	1.27595e-68	36	391	379	94.1	94.2	12	12	10.05	MFS	ethidium, Linezolid, Rifampin, Trimethoprim, Rhodamine, Chloramphenicol, Minocycline, erythromycin, Tetraphenylphosphonium chloride
ABJ63547.1	P77389	2.A.1.2.65	gnl|BL_ORD_ID|10117 gnl|TC-DB|P77389|2.A.1.2.65 Inner membrane transport protein ydhP OS=Escherichia coli (strain K12) GN=ydhP PE=1 SV=1	370	1.54639e-85	39	401	389	91.8	93.6	12	12	11.95	MFS	Unknown
ABJ65036.1	P77389	2.A.1.2.65	gnl|BL_ORD_ID|10117 gnl|TC-DB|P77389|2.A.1.2.65 Inner membrane transport protein ydhP OS=Escherichia coli (strain K12) GN=ydhP PE=1 SV=1	377	4.65372e-45	28	397	389	94.2	95.4	12	12	11.75	MFS	Unknown
ABJ63199.1	O34546	2.A.1.2.69	gnl|BL_ORD_ID|6138 gnl|TC-DB|O34546|2.A.1.2.69 Uncharacterized MFS-type transporter yttB OS=Bacillus subtilis (strain 168) GN=yttB PE=3 SV=1	372	1.14379e-74	36	413	397	88.9	91.4	12	12	11.2	MFS	Unknown
ABJ63272.1	O34546	2.A.1.2.69	gnl|BL_ORD_ID|6138 gnl|TC-DB|O34546|2.A.1.2.69 Uncharacterized MFS-type transporter yttB OS=Bacillus subtilis (strain 168) GN=yttB PE=3 SV=1	376	1.83128e-72	35	388	397	93.8	93.5	12	12	10.2	MFS	Unknown
ABJ63248.1	O34546	2.A.1.2.69	gnl|BL_ORD_ID|6138 gnl|TC-DB|O34546|2.A.1.2.69 Uncharacterized MFS-type transporter yttB OS=Bacillus subtilis (strain 168) GN=yttB PE=3 SV=1	356	2.65003e-44	31	393	397	88.3	87.9	12	12	11.05	MFS	Unknown
ABJ63561.1	P33449	2.A.1.2.70	gnl|BL_ORD_ID|8616 gnl|TC-DB|P33449|2.A.1.2.70 Multidrug resistance protein 1 OS=Bacillus subtilis (strain 168) GN=bmr PE=3 SV=2	385	1.64841e-92	39	396	389	97	97.4	12	12	10.3	MFS	drugs
ABJ63537.1	J9W1F3	2.A.1.2.93	gnl|BL_ORD_ID|4972 gnl|TC-DB|J9W1F3|2.A.1.2.93 Major facilitator transporter OS=Lactobacillus buchneri CD034 GN=LBUCD034_0427 PE=4 SV=1	394	2.87174e-78	37	412	433	94.2	88.9	12	12	11.5	MFS	Unknown
ABJ65347.1	Q9F4G1	2.A.1.2.100	gnl|BL_ORD_ID|15929 gnl|TC-DB|Q9F4G1|2.A.1.2.100 Drug resistance transporter, Bcr/CflA subfamily OS=Staphylococcus aureus GN=tcaB PE=4 SV=1	366	1.94783e-85	38	418	402	87.1	90.8	13	12	11.4	MFS	drugs
ABJ63277.1	O35018	2.A.1.3.30	gnl|BL_ORD_ID|6173 gnl|TC-DB|O35018|2.A.1.3.30 Lincomycin resistance protein lmrB - Bacillus subtilis.	461	4.10111e-143	46	477	479	94.8	95.8	14	14	13.2	MFS	None
ABJ63324.1	O35018	2.A.1.3.30	gnl|BL_ORD_ID|6173 gnl|TC-DB|O35018|2.A.1.3.30 Lincomycin resistance protein lmrB - Bacillus subtilis.	454	1.14094e-73	31	464	479	95	94.6	14	14	12.6	MFS	None
ABJ64617.1	O32182	2.A.1.3.33	gnl|BL_ORD_ID|6098 gnl|TC-DB|O32182|2.A.1.3.33 Uncharacterized MFS-type transporter yusP OS=Bacillus subtilis GN=yusP PE=3 SV=1	498	7.26648e-92	32	491	541	95.5	91.9	14	14	12	MFS	Novobiocin, Streptomycin, Actinomycin D
ABJ65095.1	Q7A3S4	2.A.1.3.61	gnl|BL_ORD_ID|13637 gnl|TC-DB|Q7A3S4|2.A.1.3.61 SA2203 protein OS=Staphylococcus aureus (strain N315) GN=SA2203 PE=4 SV=1	439	1.83427e-81	33	422	479	99.1	91.4	13	14	10.1	MFS	Hoechst 3342, doxorubicin, daunorubicin, tetraphenylphosphonium, ethidium bromide, Rhodamine 6G
ABJ64977.1	Q7A3S4	2.A.1.3.61	gnl|BL_ORD_ID|13637 gnl|TC-DB|Q7A3S4|2.A.1.3.61 SA2203 protein OS=Staphylococcus aureus (strain N315) GN=SA2203 PE=4 SV=1	475	5.96393e-80	32	470	479	96.8	98.1	14	14	11.65	MFS	Hoechst 3342, doxorubicin, daunorubicin, tetraphenylphosphonium, ethidium bromide, Rhodamine 6G
ABJ64871.1	Q180E3	2.A.1.3.72	gnl|BL_ORD_ID|11250 gnl|TC-DB|Q180E3|2.A.1.3.72 Riboflavin transporter RibZ OS=Peptoclostridium difficile (strain 630) GN=ribZ PE=1 SV=1	458	2.08689e-94	34	478	456	94.8	96.9	14	14	12	MFS	riboflavin
ABJ64791.1	I7QYF9	2.A.1.3.75	gnl|BL_ORD_ID|4875 gnl|TC-DB|I7QYF9|2.A.1.3.75 Major facilitator superfamily protein OS=Streptococcus canis FSL Z3-227 GN=SCAZ3_10115 PE=3 SV=1	481	9.88359e-160	49	498	499	94.2	96.2	14	14	8.8	MFS	None
ABJ64314.1	D5UKP1	2.A.1.3.80	gnl|BL_ORD_ID|2998 gnl|TC-DB|D5UKP1|2.A.1.3.80 Drug resistance transporter, EmrB/QacA subfamily OS=Cellulomonas flavigena (strain ATCC 482 / DSM 20109 / NCIB 8073 / NRS 134) OX=446466 GN=Cfla_0952 PE=3 SV=1	417	1.50735e-66	34	455	540	89.9	76.7	14	12	9.25	MFS	None
ABJ63273.1	P12681	2.A.1.4.2	gnl|BL_ORD_ID|7830 gnl|TC-DB|P12681|2.A.1.4.2 Phosphoglycerate transporter protein - Salmonella typhimurium.	438	2.64761e-88	36	448	463	96.9	94	12	12	11.05	MFS	phosphoglycerates, phosphate
ABJ64816.1	P16552	2.A.1.5.2	gnl|BL_ORD_ID|7975 gnl|TC-DB|P16552|2.A.1.5.2 Raffinose permease - Escherichia coli.	415	3.95449e-103	38	429	425	95.6	97.4	12	12	10.2	MFS	Raffinose, H+
ABJ64665.1	Q8XEV7	2.A.1.7.5	gnl|BL_ORD_ID|15106 gnl|TC-DB|Q8XEV7|2.A.1.7.5 Probable permease (Putative L-fucose permease) - Salmonella typhi, and Salmonella typhimurium.	426	2.46998e-165	56	449	438	94.7	95.7	11	12	9.25	MFS	2-deoxy-D-ribose, 2-deoxyribose
ABJ65280.1	O51798	2.A.1.15.9	gnl|BL_ORD_ID|6286 gnl|TC-DB|O51798|2.A.1.15.9 Probable 4-methylmuconolactone transporter - Ralstonia eutropha (strain JMP134) (Alcaligenes eutrophus).	402	6.48757e-47	30	407	428	95.6	91.6	12	12	12	MFS	4-methylmuconolactone
ABJ63758.1	P76242	2.A.1.17.3	gnl|BL_ORD_ID|10060 gnl|TC-DB|P76242|2.A.1.17.3 Inner membrane transport protein YeaN OS=Escherichia coli (strain K12) GN=yeaN PE=1 SV=1	387	9.8719e-65	36	392	393	95.7	94.9	12	12	11.9	MFS	Unknown
ABJ64797.1	P64783	2.A.1.21.12	gnl|BL_ORD_ID|9829 gnl|TC-DB|P64783|2.A.1.21.12 Probable multidrug-efflux transporter Rv1258c/MT1297 OS=Mycobacterium tuberculosis GN=Rv1258c PE=1 SV=1	392	2.21632e-24	27	397	419	94.5	91.4	12	12	10.25	MFS	drugs
ABJ63968.1	Q1CWQ3	2.A.1.24.4	gnl|BL_ORD_ID|11297 gnl|TC-DB|Q1CWQ3|2.A.1.24.4 Major facilitator family transporter OS=Myxococcus xanthus (strain DK 1622) GN=MXAN_7057 PE=4 SV=1	399	9.69931e-84	36	415	458	94.9	86.7	12	12	10.9	MFS	Unknown, NONE
ABJ65250.1	P76628	2.A.1.36.3	gnl|BL_ORD_ID|10086 gnl|TC-DB|P76628|2.A.1.36.3 Putative uncharacterized transporter ygaY OS=Escherichia coli (strain K12) GN=ygaY PE=5 SV=2	383	3.02633e-72	34	396	394	95.2	96.7	12	12	11.2	MFS	Unknown
ABJ63591.1	C7T7Y0	2.A.1.38.4	gnl|BL_ORD_ID|2469 gnl|TC-DB|C7T7Y0|2.A.1.38.4 Transporter protein OS=Lactobacillus rhamnosus (strain ATCC 53103 / GG) GN=LRHM_2666 PE=4 SV=1	403	7.16421e-77	34	420	429	94	93.2	12	12	10.1	MFS	Unknown
ABJ63306.1	P0CE45	2.A.2.3.1	gnl|BL_ORD_ID|7715 gnl|TC-DB|P0CE45|2.A.2.3.1 Glucuronide carrier protein OS=Escherichia coli (strain K12) GN=uidB PE=1 SV=1	435	2.69944e-59	31	472	457	91.1	92.3	11	11	9.45	GPH	Glucuronides
ABJ63621.1	P96792	2.A.2.3.3	gnl|BL_ORD_ID|10351 gnl|TC-DB|P96792|2.A.2.3.3 PUTATIVE XYLOSE-PROTON SYMPORTER (XYLOSE TRANSPORTER) - Lactobacillus pentosus.	469	0	75	466	479	98.9	97.7	11	11	7	GPH	Isoprimeverose
ABJ63452.1	P96792	2.A.2.3.3	gnl|BL_ORD_ID|10351 gnl|TC-DB|P96792|2.A.2.3.3 PUTATIVE XYLOSE-PROTON SYMPORTER (XYLOSE TRANSPORTER) - Lactobacillus pentosus.	429	1.2456e-113	39	443	479	95.7	89.4	11	11	9.25	GPH	Isoprimeverose
ABJ65223.1	P96792	2.A.2.3.3	gnl|BL_ORD_ID|10351 gnl|TC-DB|P96792|2.A.2.3.3 PUTATIVE XYLOSE-PROTON SYMPORTER (XYLOSE TRANSPORTER) - Lactobacillus pentosus.	460	9.16737e-97	36	459	479	98.5	92.7	12	11	8.9	GPH	Isoprimeverose
ABJ63415.1	P27837	2.A.3.1.15	gnl|BL_ORD_ID|8347 gnl|TC-DB|P27837|2.A.3.1.15 Probable transport protein YifK OS=Escherichia coli (strain K12) GN=yifK PE=1 SV=4	434	0	59	446	461	96.9	92.8	11	12	10.3	APC	Unknown
ABJ64185.1	P96704	2.A.3.1.16	gnl|BL_ORD_ID|10347 gnl|TC-DB|P96704|2.A.3.1.16 Uncharacterized transporter YdgF OS=Bacillus subtilis (strain 168) GN=ydgF PE=3 SV=1	428	0	58	452	458	94	92.8	12	12	10.35	APC	Unknown
ABJ64295.1	P96704	2.A.3.1.16	gnl|BL_ORD_ID|10347 gnl|TC-DB|P96704|2.A.3.1.16 Uncharacterized transporter YdgF OS=Bacillus subtilis (strain 168) GN=ydgF PE=3 SV=1	447	1.87245e-179	55	467	458	95.3	96.7	12	12	10.8	APC	Unknown
ABJ64779.1	K7VV21	2.A.3.1.18	gnl|BL_ORD_ID|5090 gnl|TC-DB|K7VV21|2.A.3.1.18 Lysine specific permease OS=Lactococcus lactis subsp. cremoris UC509.9 GN=uc509_2172 PE=4 SV=1	489	0	62	499	488	96.6	99.4	12	12	9.8	APC	lysine
ABJ64723.1	Q8R706	2.A.3.3.22	gnl|BL_ORD_ID|14809 gnl|TC-DB|Q8R706|2.A.3.3.22 Amino acid transporters OS=Caldanaerobacter subterraneus subsp. tengcongensis (strain DSM 15242 / JCM 11007 / NBRC 100824 / MB4) GN=PotE6 PE=4 SV=1	445	6.31278e-150	48	470	475	94.5	92.8	13	13	11.45	APC	Amino acids
ABJ64285.1	s6ex81	2.A.3.3.23	gnl|BL_ORD_ID|17737 gnl|TC-DB|s6ex81|2.A.3.3.23 Branched-chain amino acid permease OS=Lactococcus lactis subsp. lactis A12 GN=bcaP PE=4 SV=1	467	3.19017e-121	43	468	469	97.4	97.9	12	12	10.5	APC	Leucine, Isoleucine, Valine
ABJ63252.1	O30417	2.A.3.7.1	gnl|BL_ORD_ID|6025 gnl|TC-DB|O30417|2.A.3.7.1 AMINO ACID ANTIPORTER GADC (ORFX) - Lactococcus lactis (subsp. lactis) (Streptococcus lactis).	486	6.57236e-130	42	501	503	96.4	92.8	12	12	11.85	APC	Gamma-aminobutyrate, glutamate
ABJ63284.1	P39282	2.A.3.7.5	gnl|BL_ORD_ID|8937 gnl|TC-DB|P39282|2.A.3.7.5 Inner membrane transporter yjeM OS=Escherichia coli (strain K12) GN=yjeM PE=1 SV=2	481	0	60	492	500	97.6	95.6	12	12	11.45	APC	Unknown
ABJ64037.1	P39282	2.A.3.7.5	gnl|BL_ORD_ID|8937 gnl|TC-DB|P39282|2.A.3.7.5 Inner membrane transporter yjeM OS=Escherichia coli (strain K12) GN=yjeM PE=1 SV=2	484	0	52	502	500	96	95.8	12	12	11.25	APC	Unknown
ABJ65259.1	F2HL33	2.A.3.7.7	gnl|BL_ORD_ID|3748 gnl|TC-DB|F2HL33|2.A.3.7.7 YrfD protein OS=Lactococcus lactis subsp. lactis (strain CV56) GN=yrfD PE=4 SV=1	447	1.73657e-175	52	461	466	96.3	95.7	12	12	10.6	APC	Putriscine, Agmatine
ABJ64664.1	O34739	2.A.3.8.12	gnl|BL_ORD_ID|6148 gnl|TC-DB|O34739|2.A.3.8.12 YkbA protein - Bacillus subtilis.	434	6.91209e-113	41	439	438	98.4	97.7	12	12	10.45	APC	Serine, Threonine, tyrosine, tryptophan, phenylalanine, Histidine
ABJ63764.1	H1X8H0	2.A.3.14.3	gnl|BL_ORD_ID|4503 gnl|TC-DB|H1X8H0|2.A.3.14.3 APC family amino acid-polyamine-organocation transporter OS=Weissella confusa LBAE C39-2 GN=WEISSC39_07015 PE=4 SV=1	611	0	71	611	610	99.8	99.8	13	12	9.45	APC	Plantaricin JK
ABJ64786.1	O07084	2.A.4.1.3	gnl|BL_ORD_ID|5820 gnl|TC-DB|O07084|2.A.4.1.3 Cation transport protein YRDO - Bacillus subtilis.	276	5.95882e-57	38	298	311	90.6	88.1	5	5	4.5	CDF	Cd2+, Zn2+, H+, K+
ABJ63901.1	A9VJD5	2.A.6.5.9	gnl|BL_ORD_ID|1020 gnl|TC-DB|A9VJD5|2.A.6.5.9 MMPL domain protein OS=Bacillus weihenstephanensis (strain KBAB4) GN=BcerKBAB4_2742 PE=4 SV=1	1077	0	39	1096	1038	97.2	98.6	12	12	7.65	RND	Unknown
ABJ63608.1	Q6MMK1	2.A.6.6.11	gnl|BL_ORD_ID|13241 gnl|TC-DB|Q6MMK1|2.A.6.6.11 3-hydroxy-3-methylglutaryl coenzyme A reductase OS=Bdellovibrio bacteriovorus (strain ATCC 15356 / DSM 50701 / NCIB 9529 / HD100) GN=Bd1627 PE=3 SV=1	401	3.46166e-80	36	420	438	93.3	89.5	1	1	0.8	RND	Electrons
ABJ65217.1	P49856	2.A.7.1.5	gnl|BL_ORD_ID|9425 gnl|TC-DB|P49856|2.A.7.1.5 Hypothetical 11.9 kDa protein IN HMP-PROB intergenic region - Bacillus subtilis.	102	1.64999e-31	51	108	112	93.5	90.2	4	3	2.45	DMT	ethidium bromide, Proflavin, TPP chloride, Crystal violet, pyronin Y, Methylviologen, Cetylperdinium chloride, Streptomycin, tetracycline, Chloramphenicol, Phosphonomycin
ABJ65218.1	P49857	2.A.7.1.5	gnl|BL_ORD_ID|9426 gnl|TC-DB|P49857|2.A.7.1.5 Hypothetical 11.3 KDA protein IN HMP-PROB intergenic region - Bacillus subtilis.	103	1.55394e-29	49	104	105	97.1	96.2	4	4	3.5	DMT	ethidium bromide, Proflavin, TPP chloride, Crystal violet, pyronin Y, Methylviologen, Cetylperdinium chloride, Streptomycin, tetracycline, Chloramphenicol, Phosphonomycin
ABJ65013.1	P31437	2.A.7.3.12	gnl|BL_ORD_ID|8472 gnl|TC-DB|P31437|2.A.7.3.12 Uncharacterized inner membrane transporter yicL OS=Escherichia coli (strain K12) GN=yicL PE=1 SV=1	301	5.93523e-47	30	328	307	90.2	96.7	10	10	9.2	DMT	Protoprophyrin IX, delta-levulinate
ABJ63434.1	KRN20350	2.A.7.3.79	gnl|BL_ORD_ID|5289 gnl|TC-DB|KRN20350.1|2.A.7.3.79 DMT family permease [Lactobacillus similis DSM 23365 = JCM 2765]	301	6.57543e-86	47	310	313	96.1	94.9	10	10	9.35	DMT	None
ABJ64416.1	P40420	2.A.7.5.4	gnl|BL_ORD_ID|9037 gnl|TC-DB|P40420|2.A.7.5.4 Glucose uptake protein GlcU OS=Bacillus subtilis (strain 168) GN=glcU PE=2 SV=2	288	3.21198e-82	43	288	287	99.3	98.6	10	10	8.2	DMT	D-glucose
ABJ63564.1	Q3SAW5	2.A.7.21.4	gnl|BL_ORD_ID|11912 gnl|TC-DB|Q3SAW5|2.A.7.21.4 Orotate transporter - Lactococcus lactis subsp. lactis bv. diacetylactis.	300	1.14262e-79	41	309	307	96.4	96.4	10	10	8.5	DMT	Orotate
ABJ64663.1	P12012	2.A.8.1.1	gnl|BL_ORD_ID|7819 gnl|TC-DB|P12012|2.A.8.1.1 GLUCONATE PERMEASE - Bacillus subtilis.	449	5.42687e-175	55	452	448	99.1	99.3	10	11	9.7	GntP	Gluconate
ABJ64654.1	P12012	2.A.8.1.1	gnl|BL_ORD_ID|7819 gnl|TC-DB|P12012|2.A.8.1.1 GLUCONATE PERMEASE - Bacillus subtilis.	450	4.62788e-161	51	451	448	99.6	99.8	10	11	9.55	GntP	Gluconate
ABJ63574.1	L8A802	2.A.8.1.10	gnl|BL_ORD_ID|5407 gnl|TC-DB|L8A802|2.A.8.1.10 D-glycerate transporter (Predicted) OS=Enterococcus faecium NRRL B-2354 GN=M7W_1531 PE=4 SV=1	432	0	64	434	430	99.3	98.6	12	14	9.75	GntP	D-glycerate
ABJ65360.1	Q01625	2.A.9.3.2	gnl|BL_ORD_ID|10517 gnl|TC-DB|Q01625|2.A.9.3.2 Stage III sporulation protein J precursor - Bacillus subtilis.	241	4.28563e-68	43	277	261	85.9	92	6	6	5.15	YidC/Alb3/Oxa1	proteins
ABJ63598.1	Q03YV5	2.A.11.2.1	gnl|BL_ORD_ID|10654 gnl|TC-DB|Q03YV5|2.A.11.2.1 H+/gluconate symporter related permease OS=Leuconostoc mesenteroides subsp. mesenteroides (strain ATCC 8293 / NCDO 523) GN=LEUM_0501 PE=4 SV=1	429	0	62	429	425	99.8	99.5	14	14	10.35	CitMHS	Unknown
ABJ64987.1	Q9X4A5	2.A.15.1.11	gnl|BL_ORD_ID|17218 gnl|TC-DB|Q9X4A5|2.A.15.1.11 Glycine betaine transporter BetL OS=Listeria monocytogenes GN=betL PE=1 SV=1	494	7.21309e-76	30	526	507	93.3	95.3	12	12	9.9	BCCT	Glycine betaine, Na+
ABJ63685.1	Q5M4H8	2.A.17.1.6	gnl|BL_ORD_ID|12763 gnl|TC-DB|Q5M4H8|2.A.17.1.6 Di-or tripeptide:H+ symporter OS=Streptococcus thermophilus (strain ATCC BAA-250 / LMG 18311) GN=dtpT PE=3 SV=1	482	0	58	535	483	89.9	98.8	13	14	11.45	POT/PTR	dipeptides, tripeptides
ABJ63256.1	P24943	2.A.23.1.2	gnl|BL_ORD_ID|8248 gnl|TC-DB|P24943|2.A.23.1.2 PROTON/SODIUM-GLUTAMATE SYMPORT PROTEIN (GLUTAMATE-ASPARTATE CARRIER PROTEIN) - Bacillus stearothermophilus.	416	8.30024e-169	54	428	421	97	98.6	8	11	7.35	DAACS	glutamate, aspartate, Na+, H+
ABJ65352.1	F2HK99	2.A.26.1.9	gnl|BL_ORD_ID|3747 gnl|TC-DB|F2HK99|2.A.26.1.9 BrnQ protein OS=Lactococcus lactis subsp. lactis (strain CV56) GN=brnQ PE=4 SV=1	439	4.58544e-165	54	449	456	97.1	96.1	12	12	11.15	LIVCS	Branched amino acids
ABJ65176.1	F2HK99	2.A.26.1.9	gnl|BL_ORD_ID|3747 gnl|TC-DB|F2HK99|2.A.26.1.9 BrnQ protein OS=Lactococcus lactis subsp. lactis (strain CV56) GN=brnQ PE=4 SV=1	427	2.71401e-110	40	456	456	93	93.4	12	12	10.85	LIVCS	Branched amino acids
ABJ65173.1	F2HK99	2.A.26.1.9	gnl|BL_ORD_ID|3747 gnl|TC-DB|F2HK99|2.A.26.1.9 BrnQ protein OS=Lactococcus lactis subsp. lactis (strain CV56) GN=brnQ PE=4 SV=1	425	4.37514e-110	41	460	456	91.7	93	12	12	11.15	LIVCS	Branched amino acids
ABJ63365.1	Q838N7	2.A.35.1.3	gnl|BL_ORD_ID|14005 gnl|TC-DB|Q838N7|2.A.35.1.3 Na+/H+ antiporter - Enterococcus faecalis (Streptococcus faecalis).	465	0	57	480	467	96.7	98.7	12	13	10.3	NhaC	tyrosine
ABJ65261.1	Q838N7	2.A.35.1.3	gnl|BL_ORD_ID|14005 gnl|TC-DB|Q838N7|2.A.35.1.3 Na+/H+ antiporter - Enterococcus faecalis (Streptococcus faecalis).	467	2.35356e-136	40	476	467	97.9	99.1	12	13	11	NhaC	tyrosine
ABJ63825.1	O32212	2.A.36.3.2	gnl|BL_ORD_ID|6100 gnl|TC-DB|O32212|2.A.36.3.2 YvgP protein - Bacillus subtilis.	708	7.38852e-119	34	710	670	98.7	99.3	11	12	10.35	CPA1	Na+, K+, Rb+, Li+, H+
ABJ63516.1	P26235	2.A.37.2.1	gnl|BL_ORD_ID|8304 gnl|TC-DB|P26235|2.A.37.2.1 NA(+)/H(+) ANTIPORTER - Enterococcus hirae.	383	7.25529e-133	51	388	383	98.5	99	12	13	9.65	CPA2	Na+, H+
ABJ63595.1	P26235	2.A.37.2.1	gnl|BL_ORD_ID|8304 gnl|TC-DB|P26235|2.A.37.2.1 NA(+)/H(+) ANTIPORTER - Enterococcus hirae.	384	4.29123e-128	49	393	383	97.5	99	13	13	10.05	CPA2	Na+, H+
ABJ64730.1	P43440	2.A.38.4.1	gnl|BL_ORD_ID|9192 gnl|TC-DB|P43440|2.A.38.4.1 V-TYPE SODIUM ATP SYNTHASE SUBUNIT J (EC 3.6.1.34) (NA(+)- TRANSLOCATING ATPASE SUBUNIT J) - Enterococcus hirae.	432	2.33857e-141	48	450	451	95.6	95.3	8	8	8.45	Trk	K+, Na+
ABJ64796.1	Q9CF78	2.A.40.1.2	gnl|BL_ORD_ID|15850 gnl|TC-DB|Q9CF78|2.A.40.1.2 Uracil permease - Lactococcus lactis (subsp. lactis) (Streptococcus lactis).	421	4.73703e-167	57	425	430	96.5	97.7	13	13	8.8	NAT/NCS2	Uracil
ABJ64177.1	P50487	2.A.40.2.1	gnl|BL_ORD_ID|9446 gnl|TC-DB|P50487|2.A.40.2.1 HYPOTHETICAL PROTEIN IN CPE 5'REGION (FRAGMENT) - Clostridium perfringens.	436	1.55238e-56	29	449	452	95.5	92.9	13	12	9.25	NAT/NCS2	Purines
ABJ64902.1	O32140	2.A.40.3.4	gnl|BL_ORD_ID|6092 gnl|TC-DB|O32140|2.A.40.3.4 Uric acid permease PucK OS=Bacillus subtilis (strain 168) OX=224308 GN=pucK PE=2 SV=1	411	1.33682e-152	53	457	430	89.7	95.1	13	13	11.55	NAT/NCS2	None
ABJ65322.1	O34987	2.A.40.7.2	gnl|BL_ORD_ID|6167 gnl|TC-DB|O34987|2.A.40.7.2 Hypoxanthine/guanine permease (Hypothetical protein) - Bacillus subtilis.	436	1.96685e-176	57	436	440	97.7	98.9	14	12	8.5	NAT/NCS2	Hypoxanthine, Guanosine
ABJ65126.1	P31440	2.A.40.7.4	gnl|BL_ORD_ID|8473 gnl|TC-DB|P31440|2.A.40.7.4 Putative permease yicO OS=Escherichia coli (strain K12) GN=yicO PE=1 SV=3	422	1.05612e-78	36	437	444	94.1	93.9	13	12	10	NAT/NCS2	Hypoxanthine, Guanosine
ABJ65127.1	P42312	2.A.41.1.3	gnl|BL_ORD_ID|9137 gnl|TC-DB|P42312|2.A.41.1.3 Hypothetical transport protein yxjA - Bacillus subtilis.	419	1.34924e-113	44	419	397	99.8	99.7	12	11	6.6	CNT	Purines
ABJ64408.1	K4IPL7	2.A.45.2.6	gnl|BL_ORD_ID|5054 gnl|TC-DB|K4IPL7|2.A.45.2.6 Transporter, probably The plasma membrane silicon (Silicate) efflux pump, Low Silicon 2, Lsi2 OS=Bifidobacterium asteroides (strain PRL2011) GN=BAST_1180 PE=4 SV=1	382	1.38172e-42	31	367	393	94.8	95.2	10	12	6.6	ArsB	Silicon
ABJ64427.1	P39580	2.A.50.2.1	gnl|BL_ORD_ID|8965 gnl|TC-DB|P39580|2.A.50.2.1 Protein dltB - Bacillus subtilis.	399	2.278e-112	46	402	395	96.5	97.5	10	12	7.9	GUP	Alanine
ABJ64917.1	G8RFY4	2.A.52.1.5	gnl|BL_ORD_ID|4411 gnl|TC-DB|G8RFY4|2.A.52.1.5 HoxN/HupN/NixA family nickel/cobalt transporter OS=Staphylococcus aureus subsp. aureus M013 GN=M013TW_2680 PE=4 SV=1	316	2.723e-106	50	327	350	94.2	90	8	8	7.2	NiCoT	Ni2+
ABJ63497.1	Q89K67	2.A.55.2.6	gnl|BL_ORD_ID|14170 gnl|TC-DB|Q89K67|2.A.55.2.6 Probable manganese transport protein mntH OS=Bradyrhizobium japonicum GN=mntH PE=3 SV=1	434	9.56746e-143	50	459	450	94.1	94.4	11	11	8.6	Nramp	Mn2+
ABJ63585.1	Q89K67	2.A.55.2.6	gnl|BL_ORD_ID|14170 gnl|TC-DB|Q89K67|2.A.55.2.6 Probable manganese transport protein mntH OS=Bradyrhizobium japonicum GN=mntH PE=3 SV=1	440	2.4044e-134	49	455	450	96.3	95.6	11	11	8.75	Nramp	Mn2+
ABJ64767.1	Q2G140	2.A.66.1.13	gnl|BL_ORD_ID|11648 gnl|TC-DB|Q2G140|2.A.66.1.13 Multidrug export protein mepA - Staphylococcus aureus (strain NCTC 8325).	440	5.07836e-76	30	443	451	98.9	96.5	12	12	10.9	MOP	Fluoroquinolones, Tigecycline
ABJ63702.1	I6L8P4	2.A.66.1.33	gnl|BL_ORD_ID|4809 gnl|TC-DB|I6L8P4|2.A.66.1.33 MATE efflux family protein DinF OS=Streptococcus pneumoniae serotype 4 (strain ATCC BAA-334 / TIGR4) GN=dinF PE=4 SV=1	432	1.08712e-94	37	468	456	92.1	94.5	12	12	11.55	MOP	Moxifloxacin, Ciprofloxacin, Levofloxacin
ABJ63304.1	I6L8P4	2.A.66.1.33	gnl|BL_ORD_ID|4809 gnl|TC-DB|I6L8P4|2.A.66.1.33 MATE efflux family protein DinF OS=Streptococcus pneumoniae serotype 4 (strain ATCC BAA-334 / TIGR4) GN=dinF PE=4 SV=1	432	2.61574e-74	34	445	456	96.2	93.9	12	12	9.75	MOP	Moxifloxacin, Ciprofloxacin, Levofloxacin
ABJ63366.1	O27435	2.A.69.4.3	gnl|BL_ORD_ID|5989 gnl|TC-DB|O27435|2.A.69.4.3 Uncharacterized transporter MTH_1382 OS=Methanothermobacter thermautotrophicus (strain ATCC 29096 / DSM 1053 / JCM 10044 / NBRC 100330 / Delta H) GN=MTH_1382 PE=3 SV=1	338	9.03634e-16	25	357	302	91.9	97	10	10	7.55	AEC	Unknown
ABJ65252.1	Q48797	2.A.69.4.5	gnl|BL_ORD_ID|12135 gnl|TC-DB|Q48797|2.A.69.4.5 MALATE PERMEASE - Oenococcus oeni (Leuconostoc oenos).	315	4.48239e-130	60	323	314	96.9	97.8	10	10	9.25	AEC	malate
ABJ63714.1	Q48797	2.A.69.4.5	gnl|BL_ORD_ID|12135 gnl|TC-DB|Q48797|2.A.69.4.5 MALATE PERMEASE - Oenococcus oeni (Leuconostoc oenos).	315	4.57154e-74	39	315	314	98.4	99.7	9	10	8.05	AEC	malate
ABJ64015.1	Q9CHU5	2.A.72.1.3	gnl|BL_ORD_ID|15851 gnl|TC-DB|Q9CHU5|2.A.72.1.3 Probable potassium transport system protein kup 1 OS=Lactococcus lactis subsp. lactis (strain IL1403) GN=kup1 PE=3 SV=1	649	0	50	675	670	95.4	95.1	13	11	9.6	KUP	K+
ABJ63558.1	O05469	2.A.77.1.1	gnl|BL_ORD_ID|5779 gnl|TC-DB|O05469|2.A.77.1.1 CADD PROTEIN - Staphylococcus aureus.	202	2.2984e-45	37	219	209	90.4	96.2	6	6	5.6	CadD	Cd2+
ABJ63387.1	B2GF93	2.A.77.1.3	gnl|BL_ORD_ID|1554 gnl|TC-DB|B2GF93|2.A.77.1.3 Transport protein OS=Lactobacillus fermentum (strain NBRC 3956 / LMG 18251) GN=LAF_0146 PE=4 SV=1	180	1.00276e-63	55	188	194	94.7	92.3	6	6	5.85	CadD	Cd2+
ABJ65105.1	A4EZB3	2.A.78.2.1	gnl|BL_ORD_ID|469 gnl|TC-DB|A4EZB3|2.A.78.2.1 Putative transmembrane protein OS=Roseobacter sp. SK209-2-6 GN=RSK20926_04337 PE=4 SV=1	111	9.63431e-06	30	115	110	93.9	96.4	3	3	1.85	LIV-E	Branched amino acids
ABJ64784.1	Q73PT4	2.A.79.1.5	gnl|BL_ORD_ID|13535 gnl|TC-DB|Q73PT4|2.A.79.1.5 Membrane protein, putative OS=Treponema denticola (strain ATCC 35405 / CIP 103919 / DSM 14222) GN=TDE_0712 PE=4 SV=1	249	1.41216e-44	34	253	260	97.6	95	6	5	3.55	ThrE	Glycine, Alanine
ABJ64783.1	W4C0M8	2.A.79.1.7	gnl|BL_ORD_ID|18155 gnl|TC-DB|W4C0M8|2.A.79.1.7 Uncharacterized protein OS=Paenibacillus sp. FSL H8-237 GN=C171_23415 PE=4 SV=1	137	8.00183e-26	34	149	142	91.3	95.1	4	5	3.5	ThrE	Unknown
ABJ64644.1	O32095	2.A.86.1.8	gnl|BL_ORD_ID|6089 gnl|TC-DB|O32095|2.A.86.1.8 UPF0118 membrane protein yueF OS=Bacillus subtilis GN=yueF PE=3 SV=1	348	1.12862e-97	42	380	369	90.3	91.9	7	8	7.25	2.A.86	Unknown
ABJ63472.1	O32095	2.A.86.1.8	gnl|BL_ORD_ID|6089 gnl|TC-DB|O32095|2.A.86.1.8 UPF0118 membrane protein yueF OS=Bacillus subtilis GN=yueF PE=3 SV=1	348	2.09645e-59	32	390	369	87.7	92.4	9	8	8.25	2.A.86	Unknown
ABJ64942.1	E1H0W3	2.A.89.3.2	gnl|BL_ORD_ID|3220 gnl|TC-DB|E1H0W3|2.A.89.3.2 Uncharacterized membrane protein (Fragment) OS=Streptococcus pneumoniae BS455 GN=CGSSpBS455_03876 PE=4 SV=1	228	1.79091e-60	43	229	230	99.1	98.7	5	5	4.45	2.A.89	Fe2+
ABJ64941.1	E1H0W3	2.A.89.3.2	gnl|BL_ORD_ID|3220 gnl|TC-DB|E1H0W3|2.A.89.3.2 Uncharacterized membrane protein (Fragment) OS=Streptococcus pneumoniae BS455 GN=CGSSpBS455_03876 PE=4 SV=1	215	1.19117e-54	42	235	230	91.1	93	5	5	4.1	2.A.89	Fe2+
ABJ64500.1	P07373	2.A.103.1.3	gnl|BL_ORD_ID|7247 gnl|TC-DB|P07373|2.A.103.1.3 STAGE V SPORULATION PROTEIN E - Bacillus subtilis.	379	1.63174e-63	33	384	366	96.9	97.5	10	10	6.8	MPE	None
ABJ64377.1	P07373	2.A.103.1.3	gnl|BL_ORD_ID|7247 gnl|TC-DB|P07373|2.A.103.1.3 STAGE V SPORULATION PROTEIN E - Bacillus subtilis.	372	1.03862e-47	31	401	366	91	95.1	10	10	6.45	MPE	Lipid II
ABJ65209.1	P07373	2.A.103.1.3	gnl|BL_ORD_ID|7247 gnl|TC-DB|P07373|2.A.103.1.3 STAGE V SPORULATION PROTEIN E - Bacillus subtilis.	371	3.70185e-38	27	403	366	90.3	94.8	8	10	3.9	MPE	Lipid II
ABJ64862.1	B5UIP4	2.A.109.1.3	gnl|BL_ORD_ID|1770 gnl|TC-DB|B5UIP4|2.A.109.1.3 Putative tellurium resistance protein OS=Bacillus cereus AH1134 GN=BCAH1134_0458 PE=4 SV=1	251	1.45279e-64	45	249	263	96	92	7	7	5.9	TerC	Unknown
ABJ64035.1	P39803	2.A.115.1.1	gnl|BL_ORD_ID|8990 gnl|TC-DB|P39803|2.A.115.1.1 UPF0750 membrane protein yitT OS=Bacillus subtilis (strain 168) GN=yitT PE=3 SV=2	271	2.00067e-88	46	294	280	91.5	96.4	5	5	4.85	NbcE	Novobiocin
ABJ63881.1	P39803	2.A.115.1.1	gnl|BL_ORD_ID|8990 gnl|TC-DB|P39803|2.A.115.1.1 UPF0750 membrane protein yitT OS=Bacillus subtilis (strain 168) GN=yitT PE=3 SV=2	273	4.99191e-64	36	291	280	93.5	96.8	5	5	4.85	NbcE	Novobiocin
ABJ63924.1	P94357	2.A.115.1.2	gnl|BL_ORD_ID|10298 gnl|TC-DB|P94357|2.A.115.1.2 UPF0750 membrane protein YxkD OS=Bacillus subtilis (strain 168) GN=yxkD PE=3 SV=1	273	8.05465e-56	33	312	278	87.2	96.8	5	5	4.7	NbcE	Unknown
ABJ63700.1	Q03SX2	2.A.115.2.4	gnl|BL_ORD_ID|10652 gnl|TC-DB|Q03SX2|2.A.115.2.4 Predicted membrane protein OS=Lactobacillus brevis (strain ATCC 367 / JCM 1170) GN=LVIS_0552 PE=4 SV=1	195	2.99313e-139	100	195	195	99.5	99.5	4	4	4.05	NbcE	Novobiocin
ABJ65088.1	L0SAV1	2.A.118.1.6	gnl|BL_ORD_ID|5358 gnl|TC-DB|L0SAV1|2.A.118.1.6 C4-dicarboxylate anaerobic carrier protein OS=Streptococcus pneumoniae SPN994038 GN=SPN994038_18900 PE=4 SV=1	503	0	55	504	503	97.8	97.8	13	13	11.9	ArcD	Arginine, Ornithine
ABJ65085.1	Q38YQ0	2.A.118.1.7	gnl|BL_ORD_ID|11821 gnl|TC-DB|Q38YQ0|2.A.118.1.7 Putative transport protein OS=Lactobacillus sakei subsp. sakei (strain 23K) GN=LCA_0376 PE=4 SV=1	517	0	80	520	519	99.2	99.4	13	13	11.95	ArcD	Citruline, Ornithine
ABJ63965.1	WP_027108241	2.A.129.1.11	gnl|BL_ORD_ID|18418 gnl|TC-DB|WP_027108241.1|2.A.129.1.11 GtrA family protein [Lacticigenium naphtae]	138	2.89205e-32	40	145	138	94.5	99.3	4	4	3.2	LST	None
ABJ65304.1	Q8NMV4	3.A.1.1.45	gnl|BL_ORD_ID|14742 gnl|TC-DB|Q8NMV4|3.A.1.1.45 ABC-type sugar transport system, permease component OS=Corynebacterium glutamicum (strain ATCC 13032 / DSM 20300 / JCM 1318 / LMG 3730 / NCIMB 10025) GN=cg2704 PE=3 SV=1	282	2.32629e-60	37	284	281	97.9	96.8	6	6	5.9	ABC	None
ABJ65303.1	Q8NMV5	3.A.1.1.45	gnl|BL_ORD_ID|14743 gnl|TC-DB|Q8NMV5|3.A.1.1.45 ABC-type transporter, permease components OS=Corynebacterium glutamicum (strain ATCC 13032 / DSM 20300 / JCM 1318 / LMG 3730 / NCIMB 10025) GN=cg2703 PE=3 SV=1	276	2.40472e-49	33	271	304	99.6	90.5	6	6	5.4	ABC	Maltose
ABJ65305.1	Q8NMV3	3.A.1.1.45	gnl|BL_ORD_ID|14741 gnl|TC-DB|Q8NMV3|3.A.1.1.45 ABC-type transporter, periplasmic component OS=Corynebacterium glutamicum (strain ATCC 13032 / DSM 20300 / JCM 1318 / LMG 3730 / NCIMB 10025) GN=amyE PE=4 SV=1	452	3.84268e-33	23	432	443	99.1	99.5	1	1	0.75	ABC	Maltose
ABJ64838.1	P0AFT2	3.A.1.3.10	gnl|BL_ORD_ID|7626 gnl|TC-DB|P0AFT2|3.A.1.3.10 Inner membrane amino-acid ABC transporter permease protein yecS - Escherichia coli.	205	1.44205e-40	36	218	222	93.6	91.4	5	5	4.05	ABC	DAP, Cystine
ABJ64350.1	P54536	3.A.1.3.15	gnl|BL_ORD_ID|9592 gnl|TC-DB|P54536|3.A.1.3.15 Probable amino-acid ABC transporter permease protein yqiY - Bacillus subtilis.	202	7.14069e-42	37	213	219	93.4	91.8	5	5	4.6	ABC	Arginine
ABJ64839.1	A1VZQ3	3.A.1.3.16	gnl|BL_ORD_ID|294 gnl|TC-DB|A1VZQ3|3.A.1.3.16 Amino acid ABC transporter, permease protein PEB1 - Campylobacter jejuni subsp. jejuni serotype O:23/36 (strain 81-176).	197	1.28473e-46	38	212	250	92.5	78.4	5	5	4.65	ABC	aspartate, glutamate
ABJ64306.1	Q9A1H0	3.A.1.3.20	gnl|BL_ORD_ID|15706 gnl|TC-DB|Q9A1H0|3.A.1.3.20 Putative glutamine-binding periplasmic protein OS=Streptococcus pyogenes serotype M1 GN=SPy_0277 PE=4 SV=1	508	1.95832e-72	31	492	522	95.5	95.6	4	5	1.85	ABC	lysine
ABJ64525.1	B8F896	3.A.1.3.28	gnl|BL_ORD_ID|1916 gnl|TC-DB|B8F896|3.A.1.3.28 Amino acid ABC transporter, substrate-binding protein OS=Haemophilus parasuis serovar 5 (strain SH0165) GN=HAPS_2096 PE=3 SV=1	271	1.16024e-40	35	292	260	92.1	98.8	1	1	0.85	ABC	Amino acids
ABJ64834.1	Q2FZR7	3.A.1.5.19	gnl|BL_ORD_ID|11647 gnl|TC-DB|Q2FZR7|3.A.1.5.19 Putative uncharacterized protein - Staphylococcus aureus (strain NCTC 8325).	306	4.8406e-122	54	309	308	98.7	98.7	6	6	5.65	ABC	Oligopeptides
ABJ63191.1	Q2FZR3	3.A.1.5.19	gnl|BL_ORD_ID|11643 gnl|TC-DB|Q2FZR3|3.A.1.5.19 Oligopeptide ABC transporter, substrate-binding protein, putative - Staphylococcus aureus (strain NCTC 8325).	525	2.66458e-101	35	533	551	97	94.6	1	1	0.85	ABC	Oligopeptides
ABJ63188.1	Q2FZR3	3.A.1.5.19	gnl|BL_ORD_ID|11643 gnl|TC-DB|Q2FZR3|3.A.1.5.19 Oligopeptide ABC transporter, substrate-binding protein, putative - Staphylococcus aureus (strain NCTC 8325).	520	9.5083e-99	34	535	551	96.1	93.8	1	1	0.8	ABC	Oligopeptides
ABJ63201.1	Q2FZR3	3.A.1.5.19	gnl|BL_ORD_ID|11643 gnl|TC-DB|Q2FZR3|3.A.1.5.19 Oligopeptide ABC transporter, substrate-binding protein, putative - Staphylococcus aureus (strain NCTC 8325).	515	3.56578e-95	32	536	551	95.3	92.9	1	1	0.85	ABC	Oligopeptides
ABJ64835.1	Q9CIL2	3.A.1.5.25	gnl|BL_ORD_ID|15858 gnl|TC-DB|Q9CIL2|3.A.1.5.25 Oligopeptide ABC transporter substrate binding protein OS=Lactococcus lactis subsp. lactis GN=optA PE=4 SV=1	547	1.38358e-139	42	541	545	99.4	99.6	1	1	0.8	ABC	Oligopeptides, peptides
ABJ65225.1	Q9CIL2	3.A.1.5.25	gnl|BL_ORD_ID|15858 gnl|TC-DB|Q9CIL2|3.A.1.5.25 Oligopeptide ABC transporter substrate binding protein OS=Lactococcus lactis subsp. lactis GN=optA PE=4 SV=1	549	3.11443e-128	40	547	545	99.1	98.9	1	1	0.85	ABC	Oligopeptides, peptides
ABJ64836.1	Q9CIL2	3.A.1.5.25	gnl|BL_ORD_ID|15858 gnl|TC-DB|Q9CIL2|3.A.1.5.25 Oligopeptide ABC transporter substrate binding protein OS=Lactococcus lactis subsp. lactis GN=optA PE=4 SV=1	549	2.69615e-127	40	539	545	99.4	99.6	1	1	0.85	ABC	Oligopeptides, peptides
ABJ65018.1	Q9CIL2	3.A.1.5.25	gnl|BL_ORD_ID|15858 gnl|TC-DB|Q9CIL2|3.A.1.5.25 Oligopeptide ABC transporter substrate binding protein OS=Lactococcus lactis subsp. lactis GN=optA PE=4 SV=1	555	1.69046e-124	39	546	545	99.8	99.8	1	1	0.85	ABC	Oligopeptides, peptides
ABJ64523.1	Q9CIL2	3.A.1.5.25	gnl|BL_ORD_ID|15858 gnl|TC-DB|Q9CIL2|3.A.1.5.25 Oligopeptide ABC transporter substrate binding protein OS=Lactococcus lactis subsp. lactis GN=optA PE=4 SV=1	529	1.01631e-117	40	549	545	94.4	94.5	1	1	0.85	ABC	Oligopeptides, peptides
ABJ63233.1	Q9CIL2	3.A.1.5.25	gnl|BL_ORD_ID|15858 gnl|TC-DB|Q9CIL2|3.A.1.5.25 Oligopeptide ABC transporter substrate binding protein OS=Lactococcus lactis subsp. lactis GN=optA PE=4 SV=1	539	3.47403e-111	36	546	545	96.9	98	1	1	0.8	ABC	Oligopeptides, peptides
ABJ64833.1	Q9CIL0	3.A.1.5.25	gnl|BL_ORD_ID|15856 gnl|TC-DB|Q9CIL0|3.A.1.5.25 Oligopeptide ABC trasporter permease protein OS=Lactococcus lactis subsp. lactis GN=optC PE=3 SV=1	331	1.25908e-106	52	341	343	94.1	95.6	6	5	4.55	ABC	Oligopeptides, peptides
ABJ63340.1	F0TFS6	3.A.1.5.32	gnl|BL_ORD_ID|3691 gnl|TC-DB|F0TFS6|3.A.1.5.32 Oligopeptide ABC transporter substrate OS=Lactobacillus acidophilus (strain 30SC) GN=LAC30SC_07290 PE=4 SV=1	578	9.93585e-177	45	602	583	95.7	96.1	1	1	0.9	ABC	Alpha-galactosides
ABJ63342.1	F0TFS8	3.A.1.5.32	gnl|BL_ORD_ID|3693 gnl|TC-DB|F0TFS8|3.A.1.5.32 Oligopeptide transport protein OS=Lactobacillus acidophilus (strain 30SC) GN=LAC30SC_07300 PE=3 SV=1	319	2.30477e-149	63	319	319	99.7	99.7	6	6	6.25	ABC	Alpha-galactosides
ABJ63341.1	F0TFS7	3.A.1.5.32	gnl|BL_ORD_ID|3692 gnl|TC-DB|F0TFS7|3.A.1.5.32 Oligopeptide ABC transporter, permease protein OS=Lactobacillus acidophilus (strain 30SC) GN=LAC30SC_07295 PE=3 SV=1	307	2.82783e-88	44	316	310	96.8	98.7	5	6	5.05	ABC	Alpha-galactosides
ABJ64926.1	O51234	3.A.1.7.5	gnl|BL_ORD_ID|6279 gnl|TC-DB|O51234|3.A.1.7.5 Phosphate ABC transporter, permease protein PstC OS=Borrelia burgdorferi (strain ATCC 35210 / B31 / CIP 102532 / DSM 4680) GN=pstC PE=3 SV=1	277	8.35348e-57	40	317	302	84.5	90.7	6	6	4.8	ABC	phosphate
ABJ63779.1	O51234	3.A.1.7.5	gnl|BL_ORD_ID|6279 gnl|TC-DB|O51234|3.A.1.7.5 Phosphate ABC transporter, permease protein PstC OS=Borrelia burgdorferi (strain ATCC 35210 / B31 / CIP 102532 / DSM 4680) GN=pstC PE=3 SV=1	295	1.39818e-55	35	308	302	94.5	95.7	6	6	6.1	ABC	phosphate
ABJ64923.1	Q97Q45	3.A.1.11.7	gnl|BL_ORD_ID|15591 gnl|TC-DB|Q97Q45|3.A.1.11.7 Spermidine/putrescine ABC transporter, spermidine/putrescine-binding protein OS=Streptococcus pneumoniae serotype 4 (strain ATCC BAA-334 / TIGR4) GN=potD PE=4 SV=1	355	7.81799e-135	54	356	356	99.4	99.2	1	1	0.85	ABC	Spermidine, Putrescine
ABJ64921.1	Q97Q43	3.A.1.11.7	gnl|BL_ORD_ID|15589 gnl|TC-DB|Q97Q43|3.A.1.11.7 Spermidine/putrescine ABC transporter, permease protein OS=Streptococcus pneumoniae serotype 4 (strain ATCC BAA-334 / TIGR4) GN=potH PE=3 SV=1	268	2.37297e-122	65	274	275	96.7	97.1	6	6	5.8	ABC	Spermidine, Putrescine
ABJ64922.1	Q97Q44	3.A.1.11.7	gnl|BL_ORD_ID|15590 gnl|TC-DB|Q97Q44|3.A.1.11.7 Spermidine/putrescine ABC transporter, permease protein OS=Streptococcus pneumoniae serotype 4 (strain ATCC BAA-334 / TIGR4) GN=potC PE=3 SV=1	256	4.66511e-109	59	267	257	95.5	98.8	6	7	5.8	ABC	Spermidine, Putrescine
ABJ63459.1	O32243	3.A.1.12.4	gnl|BL_ORD_ID|6104 gnl|TC-DB|O32243|3.A.1.12.4 Glycine betaine/carnitine/choline-binding protein precursor (Osmoprotectant-binding protein) - Bacillus subtilis.	300	6.52533e-119	54	310	303	96.5	98.3	1	1	0.9	ABC	Choline, Carnitine, Glycine betaine, Proline betaine, Crotonobetaine, Gamma-butyrobetaine, Dimethylsulfonioacetate, Dimethylsulfoniopropionate, Ectoine, Choline-O-sulfate
ABJ63458.1	O34742	3.A.1.12.4	gnl|BL_ORD_ID|6150 gnl|TC-DB|O34742|3.A.1.12.4 Glycine betaine/carnitine/choline transport system permease protein opuCD - Bacillus subtilis.	211	4.48185e-93	63	220	229	95.5	91.7	5	5	5.6	ABC	Choline, Carnitine, Glycine betaine, Proline betaine, Crotonobetaine, Gamma-butyrobetaine, Dimethylsulfonioacetate, Dimethylsulfoniopropionate, Ectoine, Choline-O-sulfate
ABJ63460.1	O34878	3.A.1.12.4	gnl|BL_ORD_ID|6157 gnl|TC-DB|O34878|3.A.1.12.4 Glycine betaine/carnitine/choline transport system permease protein opuCB - Bacillus subtilis.	208	3.73702e-86	58	208	217	99.5	95.4	5	5	5.05	ABC	Choline, Carnitine, Glycine betaine, Proline betaine, Crotonobetaine, Gamma-butyrobetaine, Dimethylsulfonioacetate, Dimethylsulfoniopropionate, Ectoine, Choline-O-sulfate
ABJ63423.1	Q93A34	3.A.1.12.8	gnl|BL_ORD_ID|15316 gnl|TC-DB|Q93A34|3.A.1.12.8 BilEB - Listeria monocytogenes.	498	2.03282e-180	53	506	504	97	97	6	6	5.55	ABC	Glycine betaine, Proline
ABJ63843.1	Q99YA3	3.A.1.14.10	gnl|BL_ORD_ID|15688 gnl|TC-DB|Q99YA3|3.A.1.14.10 Ferrichrome transport system permease protein OS=Streptococcus pyogenes serotype M1 GN=M5005_Spy1527 PE=4 SV=1	307	5.94776e-62	38	322	340	91.9	89.7	9	9	7	ABC	Heme
ABJ63842.1	Q7A652	3.A.1.14.17	gnl|BL_ORD_ID|13642 gnl|TC-DB|Q7A652|3.A.1.14.17 High-affinity heme uptake system protein isdE - Staphylococcus aureus (strain N315).	292	1.05219e-70	39	297	292	97.6	98.3	1	1	0.85	ABC	Heme
ABJ63712.1	P0A4G2	3.A.1.15.14	gnl|BL_ORD_ID|7381 gnl|TC-DB|P0A4G2|3.A.1.15.14 Manganese ABC transporter substrate-binding lipoprotein OS=Streptococcus pneumoniae serotype 4 (strain ATCC BAA-334 / TIGR4) GN=psaA PE=1 SV=1	312	1.3827e-22	25	304	309	95.7	98.1	1	1	0.8	ABC	Mn2+
ABJ63630.1	G0LRW8	3.A.1.15.15	gnl|BL_ORD_ID|4115 gnl|TC-DB|G0LRW8|3.A.1.15.15 ABC transporter permease protein OS=Staphylococcus aureus subsp. aureus LGA251 GN=mntB PE=3 SV=1	257	3.4649e-35	29	265	278	96.2	91.7	8	9	6.75	ABC	Mn2+
ABJ65014.1	Q8K8K7	3.A.1.24.3	gnl|BL_ORD_ID|14567 gnl|TC-DB|Q8K8K7|3.A.1.24.3 Putative ABC transporter (Permease protein) OS=Streptococcus pyogenes serotype M3 GN=atmE PE=3 SV=1	227	1.6707e-70	48	226	230	98.2	97.8	5	5	4.1	ABC	Methionine
ABJ65016.1	Q8K8K9	3.A.1.24.3	gnl|BL_ORD_ID|14569 gnl|TC-DB|Q8K8K9|3.A.1.24.3 Putative lipoprotein (Putative uncharacterized protein SPs1626) OS=Streptococcus pyogenes serotype M3 GN=atmB PE=4 SV=1	280	2.54717e-66	41	267	281	98.5	99.3	1	1	0.85	ABC	Methionine
ABJ64058.1	A2RMJ9	3.A.1.25.4	gnl|BL_ORD_ID|369 gnl|TC-DB|A2RMJ9|3.A.1.25.4 Biotin transporter BioY OS=Lactococcus lactis subsp. cremoris (strain MG1363) GN=bioY PE=1 SV=1	177	2.96471e-37	37	173	189	95.4	92.1	5	5	4.5	ABC	Biotin
ABJ63915.1	Q8Y5W0	3.A.1.25.8	gnl|BL_ORD_ID|15131 gnl|TC-DB|Q8Y5W0|3.A.1.25.8 Riboflavin transporter OS=Listeria monocytogenes serovar 1/2a (strain ATCC BAA-679 / EGD-e) GN=lmo1945 PE=3 SV=1	175	3.78635e-35	35	193	203	90.2	85.2	5	5	5.15	ABC	None
ABJ65251.1	A7NRF9	3.A.1.26.5	gnl|BL_ORD_ID|782 gnl|TC-DB|A7NRF9|3.A.1.26.5 ThiW protein - Roseiflexus castenholzii DSM 13941.	152	3.35973e-36	44	165	174	90.3	83.3	5	5	4.65	ABC	thiamin
ABJ64735.1	Q03PY7	3.A.1.26.9	gnl|BL_ORD_ID|10648 gnl|TC-DB|Q03PY7|3.A.1.26.9 Energy-coupling factor transporter transmembrane protein EcfT OS=Lactobacillus brevis (strain ATCC 367 / JCM 1170) GN=ecfT PE=3 SV=1	266	0	100	266	266	99.6	99.6	6	6	5.5	ABC	folate
ABJ63966.1	Q03S56	3.A.1.26.9	gnl|BL_ORD_ID|10651 gnl|TC-DB|Q03S56|3.A.1.26.9 Uncharacterized protein OS=Lactobacillus brevis (strain ATCC 367 / JCM 1170) GN=LVIS_0823 PE=4 SV=1	177	1.91314e-124	100	177	177	99.4	99.4	5	5	5.35	ABC	folate
ABJ65202.1	Q03NM0	3.A.1.28.2	gnl|BL_ORD_ID|10642 gnl|TC-DB|Q03NM0|3.A.1.28.2 Predicted membrane protein OS=Lactobacillus brevis (strain ATCC 367 / JCM 1170) OX=387344 GN=LVIS_2151 PE=1 SV=1	166	1.73399e-117	100	166	166	99.4	99.4	4	4	4.85	ABC	folate, Hydroxymethyl pyrimidine
ABJ64892.1	Q97RS4	3.A.1.30.2	gnl|BL_ORD_ID|15595 gnl|TC-DB|Q97RS4|3.A.1.30.2 Putative uncharacterized protein OS=Streptococcus pneumoniae serotype 4 (strain ATCC BAA-334 / TIGR4) GN=SP_0719 PE=4 SV=1	175	9.81406e-47	42	187	186	93	93.5	5	4	3.9	ABC	thiamin
ABJ64894.1	Q97RS2	3.A.1.30.2	gnl|BL_ORD_ID|15593 gnl|TC-DB|Q97RS2|3.A.1.30.2 Putative uncharacterized protein OS=Streptococcus pneumoniae serotype 4 (strain ATCC BAA-334 / TIGR4) GN=SP_0721 PE=4 SV=1	214	2.59595e-24	32	217	216	96.8	95.4	6	6	3.6	ABC	thiamin
ABJ64858.1	Q99ZY4	3.A.1.34.1	gnl|BL_ORD_ID|15696 gnl|TC-DB|Q99ZY4|3.A.1.34.1 ABC transporter permease protein OS=Streptococcus pyogenes serotype M1 GN=M5005_Spy0745 PE=4 SV=1	284	2.54626e-105	57	300	289	93.3	95.8	9	8	6.6	ABC	tryptophan
ABJ64854.1	Q99ZY4	3.A.1.34.1	gnl|BL_ORD_ID|15696 gnl|TC-DB|Q99ZY4|3.A.1.34.1 ABC transporter permease protein OS=Streptococcus pyogenes serotype M1 GN=M5005_Spy0745 PE=4 SV=1	291	7.24322e-85	45	321	289	90	99.7	9	8	6.9	ABC	tryptophan
ABJ64857.1	Q99ZY6	3.A.1.34.1	gnl|BL_ORD_ID|15697 gnl|TC-DB|Q99ZY6|3.A.1.34.1 ABC transporter substrate-binding protein OS=Streptococcus pyogenes serotype M1 GN=M5005_Spy0743 PE=4 SV=1	306	4.20222e-72	39	331	332	92.1	91.3	1	1	0.55	ABC	tryptophan
ABJ64855.1	Q99ZY6	3.A.1.34.1	gnl|BL_ORD_ID|15697 gnl|TC-DB|Q99ZY6|3.A.1.34.1 ABC transporter substrate-binding protein OS=Streptococcus pyogenes serotype M1 GN=M5005_Spy0743 PE=4 SV=1	313	4.2387e-56	35	321	332	96.6	92.8	1	1	0.55	ABC	tryptophan
ABJ63883.1	P42953	3.A.1.104.1	gnl|BL_ORD_ID|9169 gnl|TC-DB|P42953|3.A.1.104.1 Teichoic acid translocation permease protein TAGG - Bacillus subtilis.	276	1.83712e-91	46	269	275	99.6	99.6	6	6	5.25	ABC	Teichoic acid
ABJ65325.1	P32011	3.A.1.105.1	gnl|BL_ORD_ID|8511 gnl|TC-DB|P32011|3.A.1.105.1 Daunorubicin resistance transmembrane protein - Streptomyces peucetius.	248	1.32699e-55	35	258	283	95.7	87.3	6	6	5.4	ABC	daunorubicin, doxorubicin
ABJ65053.1	O32748	3.A.1.117.2	gnl|BL_ORD_ID|6113 gnl|TC-DB|O32748|3.A.1.117.2 PLASMID DNA FOR HORA - Lactobacillus brevis.	576	0	59	589	583	97.6	98.5	7	5	5.7	ABC	Hop compounds
ABJ63474.1	Q973J6	3.A.1.122.10	gnl|BL_ORD_ID|15566 gnl|TC-DB|Q973J6|3.A.1.122.10 Putative ABC transporter ATP-binding protein OS=Sulfurisphaera tokodaii (strain DSM 16993 / JCM 10545 / NBRC 100140 / 7) OX=273063 GN=ST0902 PE=4 SV=1	193	1.21324e-38	37	219	232	86.3	82.8	2	2	1.85	ABC	Unknown
ABJ65248.1	H2GZC4	3.A.1.122.11	gnl|BL_ORD_ID|4542 gnl|TC-DB|H2GZC4|3.A.1.122.11 ABC transporter system involved in hemin toxicity inner membrane protein OS=Corynebacterium diphtheriae (strain ATCC 27012 / C7 (beta)) GN=hrtB PE=4 SV=1	355	7.80666e-29	27	352	344	99.7	98.8	4	4	3	ABC	Hemin
ABJ64026.1	Q03RZ6	3.A.1.122.13	gnl|BL_ORD_ID|10650 gnl|TC-DB|Q03RZ6|3.A.1.122.13 ABC-type antimicrobial peptide transport system, ATPase component - Lactobacillus brevis (strain ATCC 367 / JCM 1170)	667	0	100	667	667	99.9	99.9	5	5	5.55	ABC	Antimicrobial peptides
ABJ63301.1	F6EHL8	3.A.1.126.3	gnl|BL_ORD_ID|3909 gnl|TC-DB|F6EHL8|3.A.1.126.3 Putative exporter of polyketide antibiotics-like protein OS=Amycolicicoccus subflavus (strain DSM 45089 / DQS3-9A1) GN=AS9A_3946 PE=4 SV=1	549	6.50296e-51	29	540	537	98.1	97.8	12	12	10.15	ABC	None
ABJ64400.1	E8MFM3	3.A.1.135.6	gnl|BL_ORD_ID|3485 gnl|TC-DB|E8MFM3|3.A.1.135.6 Putative ABC transporter permease component OS=Bifidobacterium longum subsp. longum (strain ATCC 15707 / DSM 20219 / JCM 1217 / NCTC 11818 / E194b) GN=BLLJ_1836 PE=3 SV=1	610	0	46	613	609	98.2	98.2	5	7	4.05	ABC	erythromycin, tetracycline, Hoechst 33342
ABJ64401.1	A4XGX0	3.A.1.135.10	gnl|BL_ORD_ID|535 gnl|TC-DB|A4XGX0|3.A.1.135.10 ABC transporter related protein OS=Caldicellulosiruptor saccharolyticus (strain ATCC 43494 / DSM 8903 / Tp8T 6331) OX=351627 GN=Csac_0521 PE=4 SV=1	564	1.38696e-146	41	577	578	97.2	97.1	7	7	7.35	ABC	None
ABJ65155.1	P77307	3.A.1.139.2	gnl|BL_ORD_ID|10106 gnl|TC-DB|P77307|3.A.1.139.2 UPF0014 inner membrane protein ybbM OS=Escherichia coli (strain K12) GN=ybbM PE=1 SV=2	247	1.14376e-96	57	252	259	97.6	95	7	7	6.5	ABC	Fe2+
ABJ64389.1	P68699	3.A.2.1.1	gnl|BL_ORD_ID|9863 gnl|TC-DB|P68699|3.A.2.1.1 ATP synthase C chain - Escherichia coli.	65	3.28655e-15	52	70	79	91.4	81	2	2	2.25	F-ATPase	H+
ABJ64082.1	Q04JJ5	3.A.3.2.28	gnl|BL_ORD_ID|10689 gnl|TC-DB|Q04JJ5|3.A.3.2.28 Cation-transporting ATPase, E1-E2 family protein OS=Streptococcus pneumoniae serotype 2 (strain D39 / NCTC 7466) GN=SPD_1383 PE=3 SV=1	882	0	63	882	898	99.1	98.1	10	10	7.6	P-ATPase	Ca2+, Mn2+
ABJ64635.1	Q04JJ5	3.A.3.2.28	gnl|BL_ORD_ID|10689 gnl|TC-DB|Q04JJ5|3.A.3.2.28 Cation-transporting ATPase, E1-E2 family protein OS=Streptococcus pneumoniae serotype 2 (strain D39 / NCTC 7466) GN=SPD_1383 PE=3 SV=1	884	0	39	868	898	98.4	97.3	10	10	6.3	P-ATPase	Ca2+, Mn2+
ABJ63427.1	A8R5V4	3.A.3.2.41	gnl|BL_ORD_ID|940 gnl|TC-DB|A8R5V4|3.A.3.2.41 P-type Na+-ATPase OS=Exiguobacterium aurantiacum GN=mna PE=3 SV=2	865	0	44	915	889	93.6	96.4	10	10	8.55	P-ATPase	Na+
ABJ63435.1	P05425	3.A.3.5.2	gnl|BL_ORD_ID|7183 gnl|TC-DB|P05425|3.A.3.5.2 PROBABLE COPPER EXPORTING ATPASE B (EC 3.6.3.4) - Enterococcus hirae.	693	0	55	690	745	99.1	92.8	8	8	5.65	P-ATPase	Cu+, Ag+
ABJ63439.1	Q7A3E6	3.A.3.5.19	gnl|BL_ORD_ID|13636 gnl|TC-DB|Q7A3E6|3.A.3.5.19 Copper-transporting ATPase copA - Staphylococcus aureus (strain N315).	640	0	45	641	802	97.5	78.8	8	7	4.5	P-ATPase	Cu2+, Fe2+, Pb2+
ABJ63834.1	Q8TJZ4	3.A.3.6.16	gnl|BL_ORD_ID|14935 gnl|TC-DB|Q8TJZ4|3.A.3.6.16 Cadmium efflux ATPase OS=Methanosarcina acetivorans GN=cadA PE=4 SV=1	583	3.52759e-129	36	633	647	91.5	89.6	7	6	4.4	P-ATPase	Heavy metal cations
ABJ63287.1	Q9KXM5	3.A.3.23.1	gnl|BL_ORD_ID|16358 gnl|TC-DB|Q9KXM5|3.A.3.23.1 Cation-transporting ATPase - Streptomyces coelicolor.	743	3.78199e-166	41	778	802	92.7	91.5	10	10	6.15	P-ATPase	cations
ABJ63554.1	Q830Z1	3.A.3.25.3	gnl|BL_ORD_ID|13998 gnl|TC-DB|Q830Z1|3.A.3.25.3 Cadmium-translocating P-type ATPase - Enterococcus faecalis (Streptococcus faecalis).	597	0	58	602	601	98	99.2	6	7	5.55	P-ATPase	cations
ABJ65366.1	P13464	3.A.7.1.1	gnl|BL_ORD_ID|7855 gnl|TC-DB|P13464|3.A.7.1.1 Protein virD4 - Agrobacterium rhizogenes.	518	5.4576e-25	24	543	671	87.3	73.8	3	5	1.7	IVSP	Nucleopoteins, proteins
ABJ64874.1	E9RJ18	3.A.7.13.2	gnl|BL_ORD_ID|3588 gnl|TC-DB|E9RJ18|3.A.7.13.2 Putative lipoprotein OS=Bacillus subtilis subsp. natto PE=4 SV=1	74	6.33061e-11	45	156	368	44.2	19.3	3	1	0	IVSP	proteins, Nucleoproteins
ABJ64864.1	Q15HU6	3.A.7.14.2	gnl|BL_ORD_ID|11210 gnl|TC-DB|Q15HU6|3.A.7.14.2 TcpG - Clostridium perfringens.	154	1.40396e-29	41	207	334	70.5	45.5	1	1	0.55	IVSP	DNA
ABJ63833.1	Q15HU6	3.A.7.14.2	gnl|BL_ORD_ID|11210 gnl|TC-DB|Q15HU6|3.A.7.14.2 TcpG - Clostridium perfringens.	156	2.6218e-15	34	477	334	31.9	44.6	1	1	0.45	IVSP	DNA
ABJ65186.1	Q15HU6	3.A.7.14.2	gnl|BL_ORD_ID|11210 gnl|TC-DB|Q15HU6|3.A.7.14.2 TcpG - Clostridium perfringens.	130	1.28739e-11	32	157	334	73.2	38.3	1	1	0	IVSP	DNA
ABJ64495.1	Q8DQ41	3.A.11.1.2	gnl|BL_ORD_ID|14259 gnl|TC-DB|Q8DQ41|3.A.11.1.2 Competence protein - Streptococcus pneumoniae (strain ATCC BAA-255 / R6).	221	1.41384e-36	36	231	216	93.9	96.3	1	1	0.75	DNA-T	ssDNA
ABJ64556.1	P21458	3.A.12.1.1	gnl|BL_ORD_ID|8100 gnl|TC-DB|P21458|3.A.12.1.1 Stage III sporulation protein E - Bacillus subtilis.	777	0	45	781	787	96.5	98	4	4	3.5	S-DNA-T	DNA
ABJ64302.1	G2JS05	3.A.14.1.2	gnl|BL_ORD_ID|4197 gnl|TC-DB|G2JS05|3.A.14.1.2 General secretion pathway protein G OS=Listeria monocytogenes J0161 GN=LMOG_00364 PE=4 SV=1	98	2.17077e-11	34	103	107	94.2	88.8	1	1	1.1	FPE	proteins
ABJ64717.1	P0ABJ9	3.D.4.3.2	gnl|BL_ORD_ID|7506 gnl|TC-DB|P0ABJ9|3.D.4.3.2 Cytochrome d ubiquinol oxidase subunit 1 OS=Escherichia coli (strain K12) GN=cydA PE=1 SV=1	513	1.34525e-91	34	483	522	95	97.1	9	9	6.3	COX	H+
ABJ64716.1	P0ABK2	3.D.4.3.2	gnl|BL_ORD_ID|7507 gnl|TC-DB|P0ABK2|3.D.4.3.2 Cytochrome d ubiquinol oxidase subunit 2 OS=Escherichia coli (strain K12) GN=cydB PE=1 SV=1	360	2.26228e-66	32	336	379	96.7	94.7	9	9	6.55	COX	H+
ABJ63494.1	Q71WA6	4.A.5.1.2	gnl|BL_ORD_ID|13467 gnl|TC-DB|Q71WA6|4.A.5.1.2 PTS system, galactitol-specific, IIC component OS=Listeria monocytogenes serotype 4b (strain F2365) GN=LMOf2365_2645 PE=4 SV=1	408	2.02622e-111	41	461	423	88.1	95.3	11	11	8.75	Gat	Arabitol, Xylitol
ABJ63705.1	P69805	4.A.6.1.1	gnl|BL_ORD_ID|9890 gnl|TC-DB|P69805|4.A.6.1.1 Mannose permease IID component - Escherichia coli.	277	8.7093e-94	48	275	286	98.5	96.2	4	4	3.6	Man	D-N-acetyglucosamine, D-mannose, D-2-deoxyglucose, D-glucose, D-N-acetylmannosamine, D-glucosamine, D-mannosamine, D-fructose
ABJ63704.1	E1UCI1	4.A.6.1.15	gnl|BL_ORD_ID|3245 gnl|TC-DB|E1UCI1|4.A.6.1.15 PTS system, mannose/fructose/sorbose family, IIC component OS=Listeria monocytogenes serotype 4a (strain L99) GN=manM PE=4 SV=1	261	1.76421e-80	48	261	268	97.3	96.3	6	7	5.95	Man	glucose, Mannose
ABJ63477.1	Q837U1	4.B.1.1.6	gnl|BL_ORD_ID|14004 gnl|TC-DB|Q837U1|4.B.1.1.6 Nicotinamide mononucleotide transporter PnuC, putative OS=Enterococcus faecalis GN=EF_0739 PE=4 SV=1	227	5.41085e-23	27	250	226	88.8	96.9	7	8	5.75	PnuC	Deoxynucleosides
ABJ64199.1	Q54066	4.D.1.1.2	gnl|BL_ORD_ID|12364 gnl|TC-DB|Q54066|4.D.1.1.2 Poly-beta-1,6-N-acetyl-D-glucosamine synthase OS=Staphylococcus epidermidis (strain ATCC 35984 / RP62A) GN=icaA PE=1 SV=1	427	4.7158e-63	33	440	412	95	99.3	4	4	2.5	VGP	Glycosyl residues
ABJ64653.1	Q55487	4.D.1.1.14	gnl|BL_ORD_ID|12444 gnl|TC-DB|Q55487|4.D.1.1.14 Uncharacterized glycosyltransferase sll0501 OS=Synechocystis sp. (strain PCC 6803 / Kazusa) GN=sll0501 PE=3 SV=1	271	2.52351e-71	39	283	318	95.4	84.3	2	2	2.15	VGP	None
ABJ63469.1	Q55487	4.D.1.1.14	gnl|BL_ORD_ID|12444 gnl|TC-DB|Q55487|4.D.1.1.14 Uncharacterized glycosyltransferase sll0501 OS=Synechocystis sp. (strain PCC 6803 / Kazusa) GN=sll0501 PE=3 SV=1	307	6.03281e-61	37	339	318	89.7	93.7	3	2	1.6	VGP	None
ABJ64627.1	C9XJW8	4.D.2.1.7	gnl|BL_ORD_ID|2548 gnl|TC-DB|C9XJW8|4.D.2.1.7 Putative ABC transporter, permease protein OS=Clostridium difficile (strain CD196) GN=CD196_1967 PE=4 SV=1	331	2.84319e-26	26	344	360	94.2	90.6	7	8	7.05	GT2	Unknown
ABJ64345.1	K0WKG7	4.F.1.1.8	gnl|BL_ORD_ID|5004 gnl|TC-DB|K0WKG7|4.F.1.1.8 CDP-diacylglycerol--glycerol-3-phosphate 3-phosphatidyltransferase OS=Pseudomonas fluorescens R124 GN=I1A_002902 PE=3 SV=1	187	3.13579e-30	38	195	186	92.3	91.4	6	6	4.55	CEPT1	phosphate
ABJ63737.1	KZU99864	4.H.1.1.8	gnl|BL_ORD_ID|5325 gnl|TC-DB|KZU99864|4.H.1.1.8 membrane protein [Lactobacillus plantarum]	857	0	56	870	867	97.8	98.7	18	14	12.7	MprF	None
ABJ64713.1	Q8Y438	5.B.14.1.1	gnl|BL_ORD_ID|15124 gnl|TC-DB|Q8Y438|5.B.14.1.1 Lmo2635 protein OS=Listeria monocytogenes serovar 1/2a (strain ATCC BAA-679 / EGD-e) OX=169963 GN=lmo2635 PE=4 SV=1	307	3.81138e-58	35	302	319	96.7	95.9	9	9	5.75	F-EET	None
ABJ65326.1	Q8Y438	5.B.14.1.1	gnl|BL_ORD_ID|15124 gnl|TC-DB|Q8Y438|5.B.14.1.1 Lmo2635 protein OS=Listeria monocytogenes serovar 1/2a (strain ATCC BAA-679 / EGD-e) OX=169963 GN=lmo2635 PE=4 SV=1	310	1.32111e-39	31	304	319	96.7	96.9	9	9	5.85	F-EET	None
ABJ64365.1	D5T4Y6	8.A.58.2.12	gnl|BL_ORD_ID|2995 gnl|TC-DB|D5T4Y6|8.A.58.2.12 Uncharacterized protein OS=Leuconostoc kimchii (strain IMSNU 11154 / KCTC 2386 / IH25) GN=LKI_07995 PE=4 SV=1	110	1.36004e-61	70	111	113	98.2	96.5	2	2	2.25	Dispanin	NONE
ABJ64413.1	Q02YV9	9.A.24.1.7	gnl|BL_ORD_ID|10599 gnl|TC-DB|Q02YV9|9.A.24.1.7 Tryptophan-rich sensory protein OS=Lactococcus lactis subsp. cremoris (strain SK11) GN=LACR_1341 PE=4 SV=1	151	7.37921e-56	56	160	159	92.5	93.7	5	5	5.1	TSPO	cholesterol, Porphyrin
ABJ64609.1	Q99Z60	9.B.2.1.10	gnl|BL_ORD_ID|15692 gnl|TC-DB|Q99Z60|9.B.2.1.10 Putative uncharacterized protein OS=Streptococcus pyogenes serotype M1 GN=SPy_1384 PE=4 SV=1	224	7.05089e-21	32	226	231	93.8	95.7	7	6	3.6	CAAX Protease2	Unknown
ABJ64849.1	C0SP99	9.B.10.1.1	gnl|BL_ORD_ID|2122 gnl|TC-DB|C0SP99|9.B.10.1.1 9.B.10.1.1 Putative L,D-transpeptidase YciB	194	3.43676e-52	44	199	194	92.5	97.9	1	1	0.5	9.B.10	Zn2+
ABJ63333.1	O86861	9.B.14.1.13	gnl|BL_ORD_ID|6650 gnl|TC-DB|O86861|9.B.14.1.13 AgrC protein OS=Staphylococcus epidermidis GN=agrC PE=4 SV=1	382	1.4142e-20	21	444	429	83.8	84.6	6	6	5.5	HEP	Unknown
ABJ64283.1	Q1LJ96	9.B.27.2.4	gnl|BL_ORD_ID|11433 gnl|TC-DB|Q1LJ96|9.B.27.2.4 Transmembrane protein DedA family protein involved in a response to selenite OS=Ralstonia metallidurans (strain CH34 / ATCC 43123 / DSM 2839) GN=dedA PE=4 SV=1	203	1.68855e-61	45	221	219	91.4	90.4	6	5	4.7	DedA	Selenite
ABJ63569.1	BAQ24849	9.B.28.2.7	gnl|BL_ORD_ID|2063 gnl|TC-DB|BAQ24849.1|9.B.28.2.7 uncharacterized protein SRT_15880 [Streptococcus troglodytae]	242	2.6917e-36	32	239	245	98.3	96.7	4	4	3.85	MusI	None
ABJ63289.1	WP_084131416	9.B.28.5.1	gnl|BL_ORD_ID|18788 gnl|TC-DB|WP_084131416.1|9.B.28.5.1 hypothetical protein [Enterococcus aquimarinus]	596	4.38583e-100	32	597	598	97.3	97.3	7	7	6.25	MusI	None
ABJ63946.1	Q45064	9.B.31.1.2	gnl|BL_ORD_ID|11995 gnl|TC-DB|Q45064|9.B.31.1.2 Glycerol-3-phosphate acyltransferase OS=Bacillus subtilis (strain 168) GN=plsY PE=1 SV=1	190	5.91419e-55	48	207	193	91.3	95.3	5	5	4.4	PlsY	Unknown
ABJ63795.1	WP_095837247	9.B.36.1.4	gnl|BL_ORD_ID|18893 gnl|TC-DB|WP_095837247.1|9.B.36.1.4 HdeD family acid-resistance protein [Chitinophaga sp. MD30]	165	8.94792e-12	27	181	183	90.1	88.5	6	6	5.85	HdeD	None
ABJ63445.1	B9DIS8	9.B.97.5.1	gnl|BL_ORD_ID|1982 gnl|TC-DB|B9DIS8|9.B.97.5.1 Putative membrane protein with acyltransferase 3 family domain OS=Staphylococcus carnosus (strain TM300) GN=Sca_0581 PE=4 SV=1	623	2.30882e-104	33	646	611	96	96.6	11	11	9.45	ATAT	Unknown
ABJ63976.1	B8I766	9.B.105.1.5	gnl|BL_ORD_ID|1948 gnl|TC-DB|B8I766|9.B.105.1.5 Lipoprotein signal peptidase OS=Clostridium cellulolyticum (strain ATCC 35319 / DSM 5812 / JCM 6584 / H10) GN=lspA PE=3 SV=1	150	2.52974e-17	34	154	163	94.2	87.7	4	3	2.6	PbrBC	Unknown
ABJ64650.1	D0DT64	9.B.126.2.5	gnl|BL_ORD_ID|2616 gnl|TC-DB|D0DT64|9.B.126.2.5 YihY family protein OS=Lactobacillus fermentum 28-3-CHN GN=HMPREF0513_00853 PE=4 SV=1	276	9.79124e-96	46	303	299	90.8	92	6	6	5.25	YhjD	Unknown
ABJ64946.1	H3P2R4	9.B.141.1.2	gnl|BL_ORD_ID|4574 gnl|TC-DB|H3P2R4|9.B.141.1.2 Hypothetical membrane protein, YibE/F family OS=Lactobacillus plantarum subsp. plantarum NC8 GN=nc8_0863 PE=4 SV=1	243	4.17927e-112	63	260	254	93.1	95.3	7	6	5.8	YibE/F	Unknown
ABJ64947.1	C7TAQ3	9.B.141.1.3	gnl|BL_ORD_ID|2473 gnl|TC-DB|C7TAQ3|9.B.141.1.3 Uncharacterized protein OS=Lactobacillus rhamnosus (strain ATCC 53103 / GG) GN=LRHM_0777 PE=4 SV=1	359	3.9625e-68	36	371	355	96.2	98	8	9	5.25	YibE/F	Unknown
ABJ65197.1	Q9A179	9.B.143.2.1	gnl|BL_ORD_ID|15702 gnl|TC-DB|Q9A179|9.B.143.2.1 Permease OS=Streptococcus pyogenes serotype M1 GN=M5005_Spy0344 PE=4 SV=1	223	1.79017e-24	27	226	235	96	94.5	5	6	4.05	DUF1275	Unknown
ABJ65140.1	WP_071420629	9.B.144.1.6	gnl|BL_ORD_ID|18686 gnl|TC-DB|WP_071420629.1|9.B.144.1.6 hypothetical protein, partial [Oenococcus oeni]	842	2.54442e-173	34	883	844	94.6	98.3	16	15	10.95	DUF3367	None
ABJ64136.1	WP_071420629	9.B.144.1.6	gnl|BL_ORD_ID|18686 gnl|TC-DB|WP_071420629.1|9.B.144.1.6 hypothetical protein, partial [Oenococcus oeni]	836	3.20607e-172	35	876	844	94.9	98	16	15	12.25	DUF3367	None
ABJ63518.1	WP_071420629	9.B.144.1.6	gnl|BL_ORD_ID|18686 gnl|TC-DB|WP_071420629.1|9.B.144.1.6 hypothetical protein, partial [Oenococcus oeni]	880	6.3136e-49	23	906	844	93.8	98	14	15	8.65	DUF3367	None
ABJ63355.1	WP_071420629	9.B.144.1.6	gnl|BL_ORD_ID|18686 gnl|TC-DB|WP_071420629.1|9.B.144.1.6 hypothetical protein, partial [Oenococcus oeni]	858	6.19306e-40	21	853	844	94.4	97	14	15	8.85	DUF3367	None
ABJ64445.1	O31754	9.B.149.2.1	gnl|BL_ORD_ID|6077 gnl|TC-DB|O31754|9.B.149.2.1 Regulator of sigma-W protease RasP OS=Bacillus subtilis (strain 168) GN=rasP PE=1 SV=1	424	9.18284e-114	44	425	422	99.3	99.3	4	4	3.7	M50-P	None
ABJ64354.1	Q9K8H6	9.B.157.1.2	gnl|BL_ORD_ID|16279 gnl|TC-DB|Q9K8H6|9.B.157.1.2 Cell shape-determining protein MreC OS=Bacillus halodurans (strain ATCC BAA-125 / DSM 18197 / FERM 7344 / JCM 9153 / C-125) GN=mreC PE=3 SV=1	279	1.36687e-52	36	283	293	97.9	93.5	1	1	0.9	MreBCD	Folic acid
ABJ64353.1	Q9K8H7	9.B.157.1.2	gnl|BL_ORD_ID|16280 gnl|TC-DB|Q9K8H7|9.B.157.1.2 Cell-shape determining protein OS=Bacillus halodurans (strain ATCC BAA-125 / DSM 18197 / FERM 7344 / JCM 9153 / C-125) GN=mreD PE=4 SV=1	166	9.1018e-14	26	175	174	91.4	89.7	5	5	5.1	MreBCD	Folic acid
ABJ65116.1	Q03CJ3	9.B.182.1.1	gnl|BL_ORD_ID|10641 gnl|TC-DB|Q03CJ3|9.B.182.1.1 Uncharacterized membrane-bound protein conserved in bacteria OS=Lactobacillus casei (strain ATCC 334) GN=LSEI_0216 PE=4 SV=1	244	1.75572e-12	22	243	273	98.4	83.5	4	4	2.2	DUF1129	Unknown
ABJ63504.1	G0UI57	9.B.182.1.3	gnl|BL_ORD_ID|4156 gnl|TC-DB|G0UI57|9.B.182.1.3 Integral membrane protein OS=Weissella thailandensis fsh4-2 GN=WT2_01492 PE=4 SV=1	284	2.17296e-10	24	282	277	96.1	99.3	6	6	4.05	DUF1129	Unknown
ABJ63326.1	WP_089150175	9.B.244.1.2	gnl|BL_ORD_ID|18829 gnl|TC-DB|WP_089150175.1|9.B.244.1.2 hypothetical protein [Lactobacillus crispatus]	251	2.2947e-32	31	267	264	89.1	92.4	6	6	4.8	UBP3	None
ABJ65091.1	WP_061992835	9.B.257.2.3	gnl|BL_ORD_ID|18611 gnl|TC-DB|WP_061992835.1|9.B.257.2.3 DUF998 domain-containing protein [Fructobacillus ficulneus]	376	2.71118e-67	35	388	394	96.4	94.7	10	10	9.15	UBP7	None
ABJ63457.1	WP_081374788	9.B.271.1.2	gnl|BL_ORD_ID|18763 gnl|TC-DB|WP_081374788.1|9.B.271.1.2 hypothetical protein [Lactobacillus brevis]	443	0	99	443	445	99.8	99.3	13	13	12.7	UBP18	None
ABJ64446.1	WP_102961726	9.B.273.1.2	gnl|BL_ORD_ID|18931 gnl|TC-DB|WP_102961726.1|9.B.273.1.2 phosphatidate cytidylyltransferase [Burkholderia cenocepacia]	274	1.07592e-29	31	263	273	98.1	98.2	8	7	6.25	PCT	None
ABJ65139.1	G1UE81	9.B.324.1.1	gnl|BL_ORD_ID|4178 gnl|TC-DB|G1UE81|9.B.324.1.1 Surface layer protein A OS=Lactobacillus brevis OX=1580 GN=SlpA PE=4 SV=1	468	2.38275e-94	44	459	469	94.6	94.5	1	1	0.9	S-layer	None
ABJ63787.1	WP_063487264	9.B.330.4.2	gnl|BL_ORD_ID|18626 gnl|TC-DB|WP_063487264.1|9.B.330.4.2 prolipoprotein diacylglyceryl transferase [Lactobacillus plantarum]	257	1.35629e-82	48	287	272	88.9	91.9	8	7	5.2	DUF4013	None
ABJ64431.1	G4NXA5	1.A.33.1.4	gnl|BL_ORD_ID|4272 gnl|TC-DB|G4NXA5|1.A.33.1.4 Chaperone protein DnaK OS=Bacillus subtilis subsp. spizizenii TU-B-10 GN=dnaK PE=3 SV=1	616	0	74	619	611	99.4	99.5	0	0	None	Hsp70	ions
ABJ63734.1	Q9ZK21	1.C.82.1.1	gnl|BL_ORD_ID|17436 gnl|TC-DB|Q9ZK21|1.C.82.1.1 50S ribosomal protein L1 - Helicobacter pylori J99 (Campylobacter pylori J99).	231	1.43611e-81	51	232	234	99.1	98.3	0	0	None	HP2-20	small molecules
ABJ64107.1	J8IXD8	1.C.109.1.5	gnl|BL_ORD_ID|4937 gnl|TC-DB|J8IXD8|1.C.109.1.5 Hemolysin TlyA family protein OS=Bacillus cereus VD078 GN=III_01305 PE=4 SV=1	244	5.70263e-109	66	271	279	89.7	86.7	3	0	None	B-Hemolysin A	small molecules
ABJ64694.1	P0A1C7	1.S.1.1.1	gnl|BL_ORD_ID|7340 gnl|TC-DB|P0A1C7|1.S.1.1.1 Propanediol utilization protein PduA OS=Salmonella typhimurium (strain LT2 / SGSC1412 / ATCC 700720) OX=99287 GN=pduA PE=1 SV=1	90	8.39127e-45	78	92	94	96.7	94.7	0	0	None	BMC-SP1	None
ABJ64686.1	P0A1C7	1.S.1.1.1	gnl|BL_ORD_ID|7340 gnl|TC-DB|P0A1C7|1.S.1.1.1 Propanediol utilization protein PduA OS=Salmonella typhimurium (strain LT2 / SGSC1412 / ATCC 700720) OX=99287 GN=pduA PE=1 SV=1	86	5.47191e-42	77	96	94	88.5	90.4	0	0	None	BMC-SP1	None
ABJ64729.1	P39760	2.A.38.4.4	gnl|BL_ORD_ID|8984 gnl|TC-DB|P39760|2.A.38.4.4 Hypothetical protein ykqB (ORF4) - Bacillus subtilis.	216	3.21222e-59	39	220	221	97.7	96.8	0	0	None	Trk	K+
ABJ64426.1	P39579	2.A.50.2.1	gnl|BL_ORD_ID|8964 gnl|TC-DB|P39579|2.A.50.2.1 D-alanyl carrier protein OS=Bacillus subtilis (strain 168) OX=224308 GN=dltC PE=1 SV=1	77	7.29987e-16	40	77	78	97.4	97.4	0	0	None	GUP	Alanine
ABJ65306.1	P77481	3.A.1.1.46	gnl|BL_ORD_ID|10124 gnl|TC-DB|P77481|3.A.1.1.46 Putative uncharacterized ABC transporter ATP-binding protein YcjV OS=Escherichia coli (strain K12) GN=ycjV PE=5 SV=2	332	1.121e-108	52	379	360	86.5	89.7	0	0	None	ABC	Glucosides
ABJ64831.1	Q2FZR4	3.A.1.5.19	gnl|BL_ORD_ID|11644 gnl|TC-DB|Q2FZR4|3.A.1.5.19 Oligopeptide ABC transporter, ATP-binding protein, putative - Staphylococcus aureus (strain NCTC 8325).	301	9.12437e-143	66	319	313	93.7	95.2	0	0	None	ABC	Oligopeptides
ABJ64832.1	Q9CIK9	3.A.1.5.25	gnl|BL_ORD_ID|15855 gnl|TC-DB|Q9CIK9|3.A.1.5.25 Oligopeptide ABC trasporter ATP binding protein OS=Lactococcus lactis subsp. lactis GN=optD PE=4 SV=1	343	1.90353e-172	69	366	349	93.2	98	0	0	None	ABC	Oligopeptides, peptides
ABJ65005.1	Q64K09	3.A.1.5.25	gnl|BL_ORD_ID|13009 gnl|TC-DB|Q64K09|3.A.1.5.25 OptS OS=Lactococcus lactis GN=optS PE=4 SV=1	515	1.86971e-63	31	530	550	94	92.2	0	1	None	ABC	Oligopeptides, peptides
ABJ63343.1	F0TFS9	3.A.1.5.32	gnl|BL_ORD_ID|3694 gnl|TC-DB|F0TFS9|3.A.1.5.32 Oligopeptide ABC transporter ATP-binding protein OS=Lactobacillus acidophilus (strain 30SC) GN=LAC30SC_07305 PE=3 SV=1	319	3.0547e-167	70	324	328	98.1	97	0	0	None	ABC	Alpha-galactosides
ABJ63344.1	F0TFT0	3.A.1.5.32	gnl|BL_ORD_ID|3695 gnl|TC-DB|F0TFT0|3.A.1.5.32 Oligopeptide ABC transporter OS=Lactobacillus acidophilus (strain 30SC) GN=LAC30SC_07310 PE=4 SV=1	321	1.21771e-154	64	337	342	95	93.6	0	0	None	ABC	Alpha-galactosides
ABJ64924.1	P0C560	3.A.1.7.2	gnl|BL_ORD_ID|7690 gnl|TC-DB|P0C560|3.A.1.7.2 Phosphate import ATP-binding protein pstB - Mycobacterium smegmatis.	254	2.42793e-87	54	267	258	91.4	98.1	0	0	None	ABC	phosphate
ABJ63782.1	O51236	3.A.1.7.5	gnl|BL_ORD_ID|6281 gnl|TC-DB|O51236|3.A.1.7.5 Phosphate import ATP-binding protein PstB OS=Borrelia burgdorferi (strain ATCC 35210 / B31 / CIP 102532 / DSM 4680) GN=pstB PE=3 SV=1	248	2.92184e-109	59	252	260	98	95	0	0	None	ABC	phosphate
ABJ63781.1	O51236	3.A.1.7.5	gnl|BL_ORD_ID|6281 gnl|TC-DB|O51236|3.A.1.7.5 Phosphate import ATP-binding protein PstB OS=Borrelia burgdorferi (strain ATCC 35210 / B31 / CIP 102532 / DSM 4680) GN=pstB PE=3 SV=1	260	3.29347e-97	54	274	260	93.4	99.6	0	0	None	ABC	phosphate
ABJ64920.1	Q97Q42	3.A.1.11.7	gnl|BL_ORD_ID|15588 gnl|TC-DB|Q97Q42|3.A.1.11.7 Spermidine/putrescine import ATP-binding protein PotA OS=Streptococcus pneumoniae serotype 4 (strain ATCC BAA-334 / TIGR4) GN=potA PE=3 SV=1	366	1.92473e-165	65	370	385	98.1	94.8	0	0	None	ABC	Spermidine, Putrescine
ABJ63461.1	O34992	3.A.1.12.4	gnl|BL_ORD_ID|6169 gnl|TC-DB|O34992|3.A.1.12.4 Glycine betaine/carnitine/choline transport ATP-binding protein opuCA - Bacillus subtilis.	374	3.19515e-144	55	401	380	93	98.2	0	0	None	ABC	Choline, Carnitine, Glycine betaine, Proline betaine, Crotonobetaine, Gamma-butyrobetaine, Dimethylsulfonioacetate, Dimethylsulfoniopropionate, Ectoine, Choline-O-sulfate
ABJ63844.1	P15031	3.A.1.14.1	gnl|BL_ORD_ID|7907 gnl|TC-DB|P15031|3.A.1.14.1 Fe(3+) dicitrate transport ATP-binding protein FecE OS=Escherichia coli (strain K12) GN=fecE PE=3 SV=1	231	2.62388e-61	45	252	255	90.1	90.2	0	0	None	ABC	Fe3+-citrate
ABJ64737.1	Q03PY5	3.A.1.26.9	gnl|BL_ORD_ID|10644 gnl|TC-DB|Q03PY5|3.A.1.26.9 Energy-coupling factor transporter ATP-binding protein EcfA1 OS=Lactobacillus brevis (strain ATCC 367 / JCM 1170) GN=ecfA1 PE=3 SV=1	279	0	100	279	279	99.6	99.6	0	0	None	ABC	folate
ABJ64736.1	Q03PY6	3.A.1.28.2	gnl|BL_ORD_ID|10646 gnl|TC-DB|Q03PY6|3.A.1.28.2 Energy-coupling factor transporter ATP-binding protein EcfA2 OS=Lactobacillus brevis (strain ATCC 367 / JCM 1170) GN=ecfA2 PE=3 SV=1	290	0	100	290	290	99.7	99.7	0	0	None	ABC	folate, Hydroxymethyl pyrimidine
ABJ65042.1	Q2NFA8	3.A.1.32.2	gnl|BL_ORD_ID|11704 gnl|TC-DB|Q2NFA8|3.A.1.32.2 CbiO2 OS=Methanosphaera stadtmanae (strain DSM 3091) GN=cbiO2 PE=3 SV=1	575	2.18907e-102	33	550	566	97.8	98.4	0	0	None	ABC	Vitamins
ABJ64859.1	Q99ZY3	3.A.1.34.1	gnl|BL_ORD_ID|15695 gnl|TC-DB|Q99ZY3|3.A.1.34.1 Putative ABC transporter (ATP-binding protein) OS=Streptococcus pyogenes serotype M1 GN=SPy_1019 PE=4 SV=1	252	3.80186e-87	55	256	252	98	99.2	0	1	None	ABC	tryptophan
ABJ65324.1	P32010	3.A.1.105.1	gnl|BL_ORD_ID|8510 gnl|TC-DB|P32010|3.A.1.105.1 Daunorubicin resistance ATP-binding protein drrA - Streptomyces peucetius.	310	2.42792e-90	47	311	330	98.1	93	0	1	None	ABC	daunorubicin, doxorubicin
ABJ63926.1	P43672	3.A.1.120.6	gnl|BL_ORD_ID|9211 gnl|TC-DB|P43672|3.A.1.120.6 ABC transporter ATP-binding protein uup OS=Escherichia coli (strain K12) GN=uup PE=1 SV=2	622	8.63678e-107	32	630	635	97.3	97	0	1	None	ABC	Unknown
ABJ63276.1	P39115	3.A.1.121.3	gnl|BL_ORD_ID|8924 gnl|TC-DB|P39115|3.A.1.121.3 Nucleotide binding protein expZ - Bacillus subtilis.	527	3.27115e-74	31	506	547	98	93.1	0	0	None	ABC	Virginiamymycin, Lincomycin
ABJ65247.1	Q7A3X3	3.A.1.122.4	gnl|BL_ORD_ID|13638 gnl|TC-DB|Q7A3X3|3.A.1.122.4 Putative hemin import ATP-binding protein hrtA OS=Staphylococcus aureus (strain N315) GN=hrtA PE=3 SV=1	221	5.56508e-54	44	227	221	95.6	98.2	0	1	None	ABC	Heme
ABJ63302.1	F6EHL9	3.A.1.126.3	gnl|BL_ORD_ID|3910 gnl|TC-DB|F6EHL9|3.A.1.126.3 Putative ABC transporter ATP-binding subunit OS=Hoyosella subflava (strain DSM 45089 / JCM 17490 / NBRC 109087 / DQS3-9A1) OX=443218 GN=AS9A_3947 PE=4 SV=1	284	1.64252e-88	48	297	303	94.9	92.7	0	0	None	ABC	None
ABJ65058.1	Q99ZC8	3.A.1.132.6	gnl|BL_ORD_ID|15694 gnl|TC-DB|Q99ZC8|3.A.1.132.6 ABC transporter ATP-binding protein OS=Streptococcus pyogenes serotype M1 GN=M5005_Spy0992 PE=4 SV=1	231	4.84645e-46	33	236	232	97	99.1	0	0	None	ABC	Unknown
ABJ63549.1	O34697	3.A.1.134.3	gnl|BL_ORD_ID|6144 gnl|TC-DB|O34697|3.A.1.134.3 Transporter - Bacillus subtilis.	243	2.5755e-84	49	252	253	96	95.3	0	0	None	ABC	Bacitracin
ABJ65156.1	P77279	3.A.1.139.2	gnl|BL_ORD_ID|10103 gnl|TC-DB|P77279|3.A.1.139.2 Probable iron export ATP-binding protein FetA OS=Escherichia coli (strain K12) GN=fetA PE=1 SV=1	205	9.70272e-61	45	216	225	94.4	90.7	0	0	None	ABC	Fe2+
ABJ64578.1	P55339	3.A.1.143.1	gnl|BL_ORD_ID|9633 gnl|TC-DB|P55339|3.A.1.143.1 ABC-type transporter ATP-binding protein EcsA OS=Bacillus subtilis (strain 168) GN=ecsA PE=1 SV=1	240	1.92071e-102	59	244	247	98	96.8	0	0	None	ABC	proteins
ABJ63571.1	A0RI82	3.A.1.153.2	gnl|BL_ORD_ID|200 gnl|TC-DB|A0RI82|3.A.1.153.2 ABC transporter, ATP-binding protein OS=Bacillus thuringiensis (strain Al Hakam) GN=BALH_3695 PE=4 SV=1	291	6.31819e-56	33	297	298	97	96.6	0	0	None	ABC	None
ABJ63760.1	ANC59923	3.A.1.211.25	gnl|BL_ORD_ID|1278 gnl|TC-DB|ANC59923.1|3.A.1.211.25 OptrA [Enterococcus faecalis]	641	8.89479e-126	34	650	639	97.4	97.5	0	0	None	ABC	None
ABJ64384.1	P50002	3.A.2.1.5	gnl|BL_ORD_ID|9431 gnl|TC-DB|P50002|3.A.2.1.5 ATP synthase subunit beta, sodium ion specific OS=Acetobacterium woodii (strain ATCC 29683 / DSM 1030 / JCM 2381 / KCTC 1655) GN=atpD PE=1 SV=3	461	0	70	471	466	97.7	98.3	0	0	None	F-ATPase	Na+
ABJ64385.1	P50005	3.A.2.1.5	gnl|BL_ORD_ID|9432 gnl|TC-DB|P50005|3.A.2.1.5 ATP synthase gamma chain, sodium ion specific OS=Acetobacterium woodii (strain ATCC 29683 / DSM 1030 / JCM 2381 / KCTC 1655) GN=atpG PE=1 SV=3	308	1.55282e-61	35	299	302	99.3	99.7	0	0	None	F-ATPase	Na+
ABJ64387.1	Q9RMB3	3.A.2.1.5	gnl|BL_ORD_ID|16758 gnl|TC-DB|Q9RMB3|3.A.2.1.5 ATP synthase subunit delta OS=Acetobacterium woodii GN=atpH PE=3 SV=1	172	9.14181e-27	29	180	180	94.4	94.4	0	0	None	F-ATPase	Na+
ABJ64386.1	BAK19946	3.A.2.1.10	gnl|BL_ORD_ID|2056 gnl|TC-DB|BAK19946|3.A.2.1.10 ApH+ATPase alpha subunit [Aphanothece halophytica]	501	0	58	513	505	97.1	99	0	0	None	F-ATPase	protons, H+
ABJ64383.1	BAK19949	3.A.2.1.10	gnl|BL_ORD_ID|2059 gnl|TC-DB|BAK19949|3.A.2.1.10 ApH+ATPase epsilon subunit [Aphanothece halophytica]	130	3.72182e-23	33	139	138	92.8	93.5	0	0	None	F-ATPase	protons, H+
ABJ65382.1	P08690	3.A.4.1.1	gnl|BL_ORD_ID|7293 gnl|TC-DB|P08690|3.A.4.1.1 ARSENICAL PUMP-DRIVING ATPASE (EC 3.6.3.16) (ARSENITE-TRANSLOCATING ATPASE) (ARSENICAL RESISTANCE ATPASE) - Escherichia coli.	322	1.18051e-87	48	334	583	94	54.9	0	1	None	ArsAB	Arsenical
ABJ64084.1	P10121	3.A.5.1.1	gnl|BL_ORD_ID|7749 gnl|TC-DB|P10121|3.A.5.1.1 CELL DIVISION PROTEIN FTSY - Escherichia coli.	484	3.00846e-91	35	487	497	95.1	95.4	0	0	None	Sec	proteins
ABJ63772.1	P0A5Y8	3.A.5.2.2	gnl|BL_ORD_ID|7396 gnl|TC-DB|P0A5Y8|3.A.5.2.2 Protein translocase subunit secA 1 OS=Mycobacterium tuberculosis GN=secA1 PE=1 SV=1	810	0	50	787	949	95.4	85	1	0	None	Sec	proteins
ABJ64529.1	Q6MDD6	3.A.7.16.1	gnl|BL_ORD_ID|13186 gnl|TC-DB|Q6MDD6|3.A.7.16.1 Putative exodeoxyribonuclease V OS=Protochlamydia amoebophila (strain UWE25) GN=recD PE=4 SV=1	756	1.07483e-113	34	841	721	88.2	99.4	0	0	None	IVSP	None
ABJ64351.1	Q9L715	3.A.7.18.1	gnl|BL_ORD_ID|16402 gnl|TC-DB|Q9L715|3.A.7.18.1 CpaE OS=Caulobacter crescentus GN=cpaE PE=4 SV=1	251	4.39217e-11	23	268	517	90.7	47.4	0	0	None	IVSP	Cpa protein
ABJ63185.1	Q5G3M3	3.A.7.19.1	gnl|BL_ORD_ID|12694 gnl|TC-DB|Q5G3M3|3.A.7.19.1 Single-stranded DNA-binding protein OS=Enterococcus faecalis GN=pcfS PE=3 SV=1	189	2.56199e-54	49	188	150	99.5	99.3	0	0	None	IVSP	DNA
ABJ65384.1	Q5G3L7	3.A.7.19.1	gnl|BL_ORD_ID|12689 gnl|TC-DB|Q5G3L7|3.A.7.19.1 PcfY OS=Enterococcus faecalis GN=pcfY PE=4 SV=1	184	2.29932e-40	44	193	206	91.2	87.4	0	0	None	IVSP	DNA
ABJ65378.1	Q5G3L7	3.A.7.19.1	gnl|BL_ORD_ID|12689 gnl|TC-DB|Q5G3L7|3.A.7.19.1 PcfY OS=Enterococcus faecalis GN=pcfY PE=4 SV=1	193	9.09439e-23	33	194	206	96.9	90.8	0	0	None	IVSP	DNA
ABJ64432.1	P38523	3.A.8.1.1	gnl|BL_ORD_ID|8881 gnl|TC-DB|P38523|3.A.8.1.1 GrpE protein homolog, mitochondrial precursor - Saccharomyces cerevisiae (Baker's yeast).	185	1.02481e-22	31	194	228	92.3	77.2	0	0	None	MPT	proteins
ABJ63485.1	Q8SKU2	3.A.9.1.1	gnl|BL_ORD_ID|14869 gnl|TC-DB|Q8SKU2|3.A.9.1.1 Tic62 protein precursor - Pisum sativum (Garden pea).	235	3.88858e-09	26	213	534	94.4	42.5	0	2	None	CEPT or Tic-Toc	proteins
ABJ64775.1	Q9FI56	3.A.9.1.2	gnl|BL_ORD_ID|15971 gnl|TC-DB|Q9FI56|3.A.9.1.2 Chaperone protein ClpC1, chloroplastic OS=Arabidopsis thaliana GN=CLPC1 PE=1 SV=1	820	0	53	828	929	97.7	87.1	0	0	None	CEPT or Tic-Toc	proteins
ABJ63905.1	Q9FI56	3.A.9.1.2	gnl|BL_ORD_ID|15971 gnl|TC-DB|Q9FI56|3.A.9.1.2 Chaperone protein ClpC1, chloroplastic OS=Arabidopsis thaliana GN=CLPC1 PE=1 SV=1	864	0	42	870	929	97.5	86.4	0	0	None	CEPT or Tic-Toc	proteins
ABJ63769.1	P39145	3.A.11.1.1	gnl|BL_ORD_ID|8927 gnl|TC-DB|P39145|3.A.11.1.1 COMF OPERON PROTEIN 1 - Bacillus subtilis.	412	4.12124e-91	41	439	463	92.5	88.1	0	0	None	DNA-T	ssDNA
ABJ64494.1	G2JTB4	3.A.11.1.4	gnl|BL_ORD_ID|4202 gnl|TC-DB|G2JTB4|3.A.11.1.4 ComE operon protein 2 OS=Listeria monocytogenes J0161 GN=LMOG_00216 PE=3 SV=1	156	4.09972e-68	59	159	186	97.5	83.3	0	0	None	DNA-T	ssDNA
ABJ63770.1	G2JSZ8	3.A.11.1.4	gnl|BL_ORD_ID|4200 gnl|TC-DB|G2JSZ8|3.A.11.1.4 Competence protein ComFC OS=Listeria monocytogenes J0161 GN=LMOG_02351 PE=4 SV=1	228	1.10334e-30	32	225	218	99.6	99.5	0	0	None	DNA-T	ssDNA
ABJ64089.1	AKM80112	3.A.11.1.5	gnl|BL_ORD_ID|1201 gnl|TC-DB|AKM80112|3.A.11.1.5 putative ATP-dependent DNA helicase [Candidatus Saccharibacteria bacterium GW2011_GWC2_44_17]	654	3.72135e-159	42	677	676	95.3	95.9	0	0	None	DNA-T	None
ABJ64337.1	AKM80389	3.A.11.1.5	gnl|BL_ORD_ID|1209 gnl|TC-DB|AKM80389.1|3.A.11.1.5 Holliday junction ATP-dependent DNA helicase RuvA [Candidatus Saccharibacteria bacterium GW2011_GWC2_44_17]	170	1.78533e-29	39	202	192	83.2	84.9	0	1	None	DNA-T	None
ABJ64181.1	C0SP86	3.A.12.1.5	gnl|BL_ORD_ID|2121 gnl|TC-DB|C0SP86|3.A.12.1.5 DNA translocase SftA OS=Bacillus subtilis (strain 168) GN=sftA PE=1 SV=1	908	2.9069e-180	39	875	952	97.8	94.4	0	0	None	S-DNA-T	DNA
ABJ63804.1	B3ET62	3.A.23.6.1	gnl|BL_ORD_ID|1640 gnl|TC-DB|B3ET62|3.A.23.6.1 Glyceraldehyde-3-phosphate dehydrogenase OS=Amoebophilus asiaticus (strain 5a2) GN=Aasi_1069 PE=3 SV=1	323	1.05278e-90	48	336	331	94.9	94.9	0	0	None	T6SS	None
ABJ63891.1	B3ERW3	3.A.23.6.1	gnl|BL_ORD_ID|1638 gnl|TC-DB|B3ERW3|3.A.23.6.1 Uncharacterized protein OS=Amoebophilus asiaticus (strain 5a2) GN=Aasi_0564 PE=4 SV=1	301	2.61946e-82	46	328	314	90.5	94.3	0	0	None	T6SS	None
ABJ64281.1	F4K2G0	3.D.1.8.1	gnl|BL_ORD_ID|3840 gnl|TC-DB|F4K2G0|3.D.1.8.1 Peptidyl-prolyl cis-trans isomerase OS=Arabidopsis thaliana GN=CYP20-2 PE=3 SV=1	169	3.161e-34	44	197	255	83.2	55.3	0	0	None	NDH	H+
ABJ64428.1	P31552	4.C.1.1.6	gnl|BL_ORD_ID|8485 gnl|TC-DB|P31552|4.C.1.1.6 PROBABLE CROTONOBETAINE/CARNITINE-COA LIGASE (EC 6.3.2.-) - Escherichia coli.	502	1.94068e-17	24	508	517	92.9	92.3	0	0	None	FAT	Carnitine, Crotonobetaine
ABJ64714.1	Q8Y433	5.B.14.1.1	gnl|BL_ORD_ID|15119 gnl|TC-DB|Q8Y433|5.B.14.1.1 Lmo2641 protein OS=Listeria monocytogenes serovar 1/2a (strain ATCC BAA-679 / EGD-e) OX=169963 GN=lmo2641 PE=3 SV=1	320	6.36308e-77	38	325	326	98.2	97.9	0	1	None	F-EET	None
ABJ65321.1	P80874	8.A.5.1.4	gnl|BL_ORD_ID|10186 gnl|TC-DB|P80874|8.A.5.1.4 General stress protein 69 OS=Bacillus subtilis (strain 168) GN=yhdN PE=1 SV=2	308	2.6237e-59	33	327	331	93.3	92.4	0	0	None	KTN	NONE
ABJ65011.1	P80874	8.A.5.1.4	gnl|BL_ORD_ID|10186 gnl|TC-DB|P80874|8.A.5.1.4 General stress protein 69 OS=Bacillus subtilis (strain 168) GN=yhdN PE=1 SV=2	335	2.56027e-26	29	327	331	98.5	95.8	0	0	None	KTN	NONE
ABJ64907.1	P80874	8.A.5.1.4	gnl|BL_ORD_ID|10186 gnl|TC-DB|P80874|8.A.5.1.4 General stress protein 69 OS=Bacillus subtilis (strain 168) GN=yhdN PE=1 SV=2	313	4.77707e-23	28	268	331	95.5	92.4	0	0	None	KTN	NONE
ABJ63438.1	P80874	8.A.5.1.4	gnl|BL_ORD_ID|10186 gnl|TC-DB|P80874|8.A.5.1.4 General stress protein 69 OS=Bacillus subtilis (strain 168) GN=yhdN PE=1 SV=2	328	5.29296e-17	24	281	331	97.2	95.2	0	0	None	KTN	NONE
ABJ64043.1	P77735	8.A.5.1.6	gnl|BL_ORD_ID|10140 gnl|TC-DB|P77735|8.A.5.1.6 Uncharacterized oxidoreductase YajO OS=Escherichia coli (strain K12) GN=yajO PE=3 SV=2	324	1.43345e-91	45	335	324	94.6	99.1	0	0	None	KTN	NONE
ABJ63270.1	P77735	8.A.5.1.6	gnl|BL_ORD_ID|10140 gnl|TC-DB|P77735|8.A.5.1.6 Uncharacterized oxidoreductase YajO OS=Escherichia coli (strain K12) GN=yajO PE=3 SV=2	303	5.89346e-31	31	280	324	92.1	90.7	0	0	None	KTN	NONE
ABJ63548.1	P76187	8.A.5.1.7	gnl|BL_ORD_ID|10053 gnl|TC-DB|P76187|8.A.5.1.7 Oxidoreductase YdhF OS=Escherichia coli (strain K12) GN=ydhF PE=1 SV=2	280	9.64194e-37	33	317	298	87.4	85.6	0	0	None	KTN	NONE
ABJ64630.1	P08839	8.A.7.1.1	gnl|BL_ORD_ID|7300 gnl|TC-DB|P08839|8.A.7.1.1 PHOSPHOENOLPYRUVATE-PROTEIN PHOSPHOTRANSFERASE (EC 2.7.3.9) (PHOSPHOTRANSFERASE SYSTEM, ENZYME I) - Escherichia coli.	567	3.26656e-147	41	578	575	97.4	98.1	0	0	None	EI	NONE
ABJ64631.1	H1XXZ0	8.A.8.1.5	gnl|BL_ORD_ID|4509 gnl|TC-DB|H1XXZ0|8.A.8.1.5 Phosphotransferase system, phosphocarrier protein HPr OS=Caldithrix abyssi DSM 13497 GN=Calab_1239 PE=4 SV=1	82	2.35656e-14	38	88	89	92	91	0	0	None	HPr	NONE
ABJ63236.1	P0AA53	8.A.21.2.2	gnl|BL_ORD_ID|7442 gnl|TC-DB|P0AA53|8.A.21.2.2 Protein QmcA OS=Escherichia coli (strain K12) GN=qmcA PE=1 SV=1	278	1.73485e-26	27	282	305	93.6	90.8	0	1	None	Stomatin	NONE
ABJ64355.1	Q01465	9.B.157.1.1	gnl|BL_ORD_ID|10509 gnl|TC-DB|Q01465|9.B.157.1.1 Rod shape-determining protein MreB OS=Bacillus subtilis (strain 168) GN=mreB PE=3 SV=3	337	8.287e-158	65	334	337	99.7	99.1	0	1	None	MreBCD	Folic acid
ABJ64380.1	Q01465	9.B.157.1.1	gnl|BL_ORD_ID|10509 gnl|TC-DB|Q01465|9.B.157.1.1 Rod shape-determining protein MreB OS=Bacillus subtilis (strain 168) GN=mreB PE=3 SV=3	326	9.69255e-121	52	335	337	96.4	95.8	0	1	None	MreBCD	Folic acid
ABJ64545.1	Q9K8H5	9.B.157.1.2	gnl|BL_ORD_ID|16278 gnl|TC-DB|Q9K8H5|9.B.157.1.2 Cell-shape determining protein OS=Bacillus halodurans (strain ATCC BAA-125 / DSM 18197 / FERM 7344 / JCM 9153 / C-125) GN=mreB PE=4 SV=1	200	3.49038e-06	24	442	346	41	55.2	0	1	None	MreBCD	Folic acid

## Sheet: Bulgaricus
Query ID	Hit ID	Hit TCID	Hit Description	Match Len	e-Val	% Identity	Query Length	Hit Length	Query Coverage	Hit Coverage	Query TMS#	Hit TMS#	TM-Overlap Score	Family Abrv.	Predicted Substrate
CAI96908.1	D7VC84	1.A.8.2.8	gnl|BL_ORD_ID|3105 gnl|TC-DB|D7VC84|1.A.8.2.8 MIP family glycerol uptake facilitator protein GlpF OS=Lactobacillus plantarum subsp. plantarum ATCC 14917 GN=glpF6 PE=3 SV=1	235	3.51442e-109	65	240	238	97.5	97.9	6	6	5.5	MIP	water, glycerol, Dihydroxyacetone
CAI98452.1	O66515	1.A.11.1.5	gnl|BL_ORD_ID|6429 gnl|TC-DB|O66515|1.A.11.1.5 Ammonia channel OS=Aquifex aeolicus (strain VF5) GN=amt PE=1 SV=1	406	3.02504e-104	42	416	423	96.6	93.4	11	12	11.15	Amt	ammonia
CAI97340.1	A3CPR5	1.A.14.2.6	gnl|BL_ORD_ID|391 gnl|TC-DB|A3CPR5|1.A.14.2.6 Integral membrane protein, possible receptor, putative OS=Streptococcus sanguinis (strain SK36) GN=SSA_1788 PE=4 SV=1	223	3.41621e-42	37	237	227	93.2	97.4	7	7	6.2	CaTA	Unknown
CAI98388.1	O34897	1.A.23.3.1	gnl|BL_ORD_ID|6159 gnl|TC-DB|O34897|1.A.23.3.1 YKUT PROTEIN - Bacillus subtilis.	227	8.30159e-44	38	283	267	79.5	84.6	2	2	1.25	MscS	Osmolytes
CAI98633.1	A3CLT2	1.A.35.3.4	gnl|BL_ORD_ID|390 gnl|TC-DB|A3CLT2|1.A.35.3.4 Cation transporter CorA family, putative OS=Streptococcus sanguinis (strain SK36) GN=SSA_0701 PE=4 SV=1	282	3.32405e-40	28	305	302	91.5	91.1	3	3	2.05	MIT	Mg2+
CAI97490.1	O07591	1.A.43.1.2	gnl|BL_ORD_ID|5835 gnl|TC-DB|O07591|1.A.43.1.2 Protein CrcB homolog 2 OS=Bacillus subtilis (strain 168) GN=crcB2 PE=3 SV=1	130	9.84666e-12	36	128	131	96.9	96.2	3	4	2.25	Fluc	Camphor, Fl-
CAI97491.1	F6CB17	1.A.43.1.14	gnl|BL_ORD_ID|3899 gnl|TC-DB|F6CB17|1.A.43.1.14 Putative fluoride ion transporter CrcB OS=Lactobacillus kefiranofaciens (strain ZW3) GN=crcB PE=3 SV=1	122	3.65925e-38	51	119	124	98.3	97.6	4	4	3.45	Fluc	Fl-
CAI98540.1	K9UKU9	1.A.78.2.9	gnl|BL_ORD_ID|5129 gnl|TC-DB|K9UKU9|1.A.78.2.9 Putative integral membrane protein OS=Chamaesiphon minutus PCC 6605 GN=Cha6605_4324 PE=4 SV=1	199	3.73378e-45	42	234	197	82.9	99.5	6	5	4.5	KEL	None
CAI97368.1	T1Y8N2	1.A.112.2.10	gnl|BL_ORD_ID|17867 gnl|TC-DB|T1Y8N2|1.A.112.2.10 Magnesium and cobalt efflux protein corC OS=Staphylococcus aureus subsp. aureus CN1 OX=1193576 GN=SAKOR_00699 PE=4 SV=1	434	4.31183e-75	31	448	449	96.7	95.1	4	4	3.6	CNNM	None
CAI98080.1	P54176	1.C.113.1.1	gnl|BL_ORD_ID|9577 gnl|TC-DB|P54176|1.C.113.1.1 HEMOLYSIN III (HLY-III) - Bacillus cereus.	204	7.64024e-65	46	220	219	92.3	92.7	7	7	6.45	Hly III	small molecules
CAI97339.1	P25744	2.A.1.2.20	gnl|BL_ORD_ID|8291 gnl|TC-DB|P25744|2.A.1.2.20 Hypothetical transport protein yceE - Escherichia coli.	390	5.61566e-126	47	399	408	97.5	94.9	12	12	11.35	MFS	fosfomycin, Fluoroquinolones
CAI97056.1	O34546	2.A.1.2.69	gnl|BL_ORD_ID|6138 gnl|TC-DB|O34546|2.A.1.2.69 Uncharacterized MFS-type transporter yttB OS=Bacillus subtilis (strain 168) GN=yttB PE=3 SV=1	377	5.889e-65	34	406	397	92.1	92.4	12	12	10.5	MFS	Unknown, NONE
CAI98373.1	P96712	2.A.1.3.50	gnl|BL_ORD_ID|10349 gnl|TC-DB|P96712|2.A.1.3.50 Multidrug resistance protein 3 OS=Bacillus subtilis (strain 168) GN=bmr3 PE=1 SV=1	487	1.22353e-79	33	477	512	97.5	93.6	14	14	10.95	MFS	drugs
CAI96992.1	P96712	2.A.1.3.50	gnl|BL_ORD_ID|10349 gnl|TC-DB|P96712|2.A.1.3.50 Multidrug resistance protein 3 OS=Bacillus subtilis (strain 168) GN=bmr3 PE=1 SV=1	488	9.67757e-61	28	491	512	96.1	94.3	14	14	11.8	MFS	drugs
CAI98560.1	P37662	2.A.1.11.3	gnl|BL_ORD_ID|8812 gnl|TC-DB|P37662|2.A.1.11.3 Inner membrane protein yhjX OS=Escherichia coli (strain K12) GN=yhjX PE=1 SV=1	400	1.976e-49	29	411	402	96.8	95.5	12	12	9.6	MFS	Unknown, Oxalate
CAI98553.1	Q9I0P8	2.A.1.11.8	gnl|BL_ORD_ID|16192 gnl|TC-DB|Q9I0P8|2.A.1.11.8 Uncharacterized protein OS=Pseudomonas aeruginosa (strain ATCC 15692 / PAO1 / 1C / PRS 101 / LMG 12228) GN=PA2589 PE=4 SV=1	369	9.31702e-35	30	384	404	94.5	89.6	11	12	9.6	MFS	Unknown
CAI98555.1	Q9I0P8	2.A.1.11.8	gnl|BL_ORD_ID|16192 gnl|TC-DB|Q9I0P8|2.A.1.11.8 Uncharacterized protein OS=Pseudomonas aeruginosa (strain ATCC 15692 / PAO1 / 1C / PRS 101 / LMG 12228) GN=PA2589 PE=4 SV=1	369	2.07987e-29	26	389	404	93.6	89.6	11	12	8.85	MFS	Unknown
CAI98249.1	D2PCQ8	2.A.1.21.10	gnl|BL_ORD_ID|2733 gnl|TC-DB|D2PCQ8|2.A.1.21.10 Major facilitator superfamily MFS_1 OS=Sulfolobus islandicus (strain L.D.8.5 / Lassen #2) GN=LD85_1820 PE=4 SV=1	404	1.74455e-17	22	404	390	98	98.5	12	12	8.2	MFS	Unknown, NONE
CAI98271.1	C2UR80	2.A.1.46.5	gnl|BL_ORD_ID|2190 gnl|TC-DB|C2UR80|2.A.1.46.5 Quinolone resistence protein, major facilitator family transporter OS=Bacillus cereus Rock3-28 GN=bcere0019_7170 PE=4 SV=1	376	4.11752e-35	22	406	407	91.9	91.9	12	12	10.55	MFS	Quinolone
CAI96962.1	O34691	2.A.1.82.4	gnl|BL_ORD_ID|6143 gnl|TC-DB|O34691|2.A.1.82.4 Hypothetical metabolite transport protein yceI - Bacillus subtilis.	406	1.20279e-50	28	408	400	98.8	99.2	11	12	10.3	MFS	Niacin
CAI98004.1	P23936	2.A.2.2.1	gnl|BL_ORD_ID|8207 gnl|TC-DB|P23936|2.A.2.2.1 LACTOSE PERMEASE (LACTOSE-PROTON SYMPORT) (LACTOSE TRANSPORT PROTEIN) - Streptococcus thermophilus.	623	0	64	627	634	98.6	98.1	13	13	9.05	GPH	Lactitol, Beta-galactooligosaccharides, Lactose
CAI98569.1	P96704	2.A.3.1.16	gnl|BL_ORD_ID|10347 gnl|TC-DB|P96704|2.A.3.1.16 Uncharacterized transporter YdgF OS=Bacillus subtilis (strain 168) GN=ydgF PE=3 SV=1	449	4.19475e-132	41	456	458	97.8	97.4	12	12	10.2	APC	Unknown
CAI98501.1	F2HQ25	2.A.3.1.21	gnl|BL_ORD_ID|3755 gnl|TC-DB|F2HQ25|2.A.3.1.21 YdgC protein OS=Lactococcus lactis subsp. lactis (strain CV56) GN=ydgC PE=4 SV=1	459	3.5618e-143	45	462	459	97.4	98.5	12	12	10.6	APC	L-Serine, L-threonine, L-cysteine
CAI97501.1	P75835	2.A.3.7.2	gnl|BL_ORD_ID|10025 gnl|TC-DB|P75835|2.A.3.7.2 Inner membrane transporter ycaM OS=Escherichia coli (strain K12) GN=ycaM PE=1 SV=2	467	1.02707e-115	37	543	476	85.5	97.1	14	12	11.1	APC	glutamate, Gamma-aminobutyric acid
CAI97370.1	O34739	2.A.3.8.12	gnl|BL_ORD_ID|6148 gnl|TC-DB|O34739|2.A.3.8.12 YkbA protein - Bacillus subtilis.	430	1.6411e-87	35	430	438	99.3	97	12	12	10.85	APC	Serine, Threonine, tyrosine, tryptophan, phenylalanine, Histidine
CAI98107.1	P13512	2.A.4.1.1	gnl|BL_ORD_ID|7862 gnl|TC-DB|P13512|2.A.4.1.1 COBALT-ZINC-CADMIUM RESISTANCE PROTEIN CZCD (CATION EFFLUX SYSTEM PROTEIN CZCD) - Alcaligenes eutrophus (Ralstonia eutropha).	263	4.20052e-58	38	286	316	91.3	82.3	5	5	3.2	CDF	Cd2+, Zn2+, Co2+, Cu2+, Ni2+
CAI98629.1	A9VJD5	2.A.6.5.9	gnl|BL_ORD_ID|1020 gnl|TC-DB|A9VJD5|2.A.6.5.9 MMPL domain protein OS=Bacillus weihenstephanensis (strain KBAB4) GN=BcerKBAB4_2742 PE=4 SV=1	1049	0	39	1060	1038	97.8	98.6	12	12	8.3	RND	Unknown
CAI98857.1	P31437	2.A.7.3.12	gnl|BL_ORD_ID|8472 gnl|TC-DB|P31437|2.A.7.3.12 Uncharacterized inner membrane transporter yicL OS=Escherichia coli (strain K12) GN=yicL PE=1 SV=1	295	8.7987e-57	36	303	307	96	94.8	10	10	8.55	DMT	Protoprophyrin IX, delta-levulinate
CAI97833.1	KRN20350	2.A.7.3.79	gnl|BL_ORD_ID|5289 gnl|TC-DB|KRN20350.1|2.A.7.3.79 DMT family permease [Lactobacillus similis DSM 23365 = JCM 2765]	287	5.19523e-50	32	303	313	92.4	89.5	10	10	9	DMT	None
CAI98158.1	Q9X4M3	2.A.7.5.2	gnl|BL_ORD_ID|17220 gnl|TC-DB|Q9X4M3|2.A.7.5.2 PUTATIVE RIBOSE TRANSPORTER RBSU - Lactobacillus sakei.	283	1.07841e-69	41	282	294	98.2	95.6	10	10	8.15	DMT	Ribose
CAI98940.1	Q01625	2.A.9.3.2	gnl|BL_ORD_ID|10517 gnl|TC-DB|Q01625|2.A.9.3.2 Stage III sporulation protein J precursor - Bacillus subtilis.	248	1.54519e-71	44	289	261	85.5	92	5	6	4.65	YidC/Alb3/Oxa1	proteins
CAI97314.1	P54104	2.A.26.1.3	gnl|BL_ORD_ID|9572 gnl|TC-DB|P54104|2.A.26.1.3 BRANCHED-CHAIN AMINO ACID TRANSPORT SYSTEM CARRIER PROTEIN (BRANCHED- CHAIN AMINO ACID UPTAKE CARRIER) - Lactobacillus delbrueckii (subsp. lactis).	446	0	97	446	446	99.8	99.8	12	12	12.25	LIVCS	Branched amino acids, H+
CAI98582.1	Q838N7	2.A.35.1.3	gnl|BL_ORD_ID|14005 gnl|TC-DB|Q838N7|2.A.35.1.3 Na+/H+ antiporter - Enterococcus faecalis (Streptococcus faecalis).	450	0	57	459	467	97.8	96.1	12	13	11.3	NhaC	tyrosine
CAI98883.1	P26235	2.A.37.2.1	gnl|BL_ORD_ID|8304 gnl|TC-DB|P26235|2.A.37.2.1 NA(+)/H(+) ANTIPORTER - Enterococcus hirae.	381	3.48947e-120	49	386	383	98.4	98.7	13	13	10.8	CPA2	Na+, H+
CAI97375.1	Q9CF78	2.A.40.1.2	gnl|BL_ORD_ID|15850 gnl|TC-DB|Q9CF78|2.A.40.1.2 Uracil permease - Lactococcus lactis (subsp. lactis) (Streptococcus lactis).	422	2.16312e-173	57	427	430	96	97.7	14	13	9.7	NAT/NCS2	Uracil
CAI97134.1	P42086	2.A.40.3.1	gnl|BL_ORD_ID|9118 gnl|TC-DB|P42086|2.A.40.3.1 XANTHINE PERMEASE - Bacillus subtilis.	412	2.48874e-160	56	430	438	95.6	93.6	12	13	9.5	NAT/NCS2	Xanthine
CAI98924.1	O34987	2.A.40.7.2	gnl|BL_ORD_ID|6167 gnl|TC-DB|O34987|2.A.40.7.2 Hypoxanthine/guanine permease (Hypothetical protein) - Bacillus subtilis.	437	2.03563e-161	53	436	440	97.9	98.9	14	12	7.95	NAT/NCS2	Hypoxanthine, Guanosine
CAI98823.1	Q41364	2.A.47.3.1	gnl|BL_ORD_ID|11962 gnl|TC-DB|Q41364|2.A.47.3.1 2-OXOGLUTARATE/MALATE TRANSLOCATOR PRECURSOR - Spinacia oleracea (Spinach).	467	3.03175e-122	40	472	569	97.7	81.7	14	14	9.3	DASS	2-oxoglutarate
CAI98871.1	P39580	2.A.50.2.1	gnl|BL_ORD_ID|8965 gnl|TC-DB|P39580|2.A.50.2.1 Protein dltB - Bacillus subtilis.	406	3.5199e-124	49	410	395	95.9	98	9	12	6.25	GUP	Alanine
CAI97935.1	O34474	2.A.66.1.25	gnl|BL_ORD_ID|6136 gnl|TC-DB|O34474|2.A.66.1.25 Probable multidrug resistance protein yoeA OS=Bacillus subtilis (strain 168) GN=yoeA PE=3 SV=2	401	5.67515e-25	22	428	463	91.8	81.6	11	12	8.95	MOP	drugs
CAI97876.1	O34474	2.A.66.1.25	gnl|BL_ORD_ID|6136 gnl|TC-DB|O34474|2.A.66.1.25 Probable multidrug resistance protein yoeA OS=Bacillus subtilis (strain 168) GN=yoeA PE=3 SV=2	401	5.67515e-25	22	428	463	91.8	81.6	11	12	8.95	MOP	drugs
CAI98739.1	Q8KUK6	2.A.66.2.16	gnl|BL_ORD_ID|14593 gnl|TC-DB|Q8KUK6|2.A.66.2.16 CpsU OS=Streptococcus thermophilus GN=cpsU PE=4 SV=1	470	1.08303e-161	48	476	471	98.5	99.4	12	14	9.8	MOP	Capsular polysaccharides
CAI98677.1	Q8KUK6	2.A.66.2.16	gnl|BL_ORD_ID|14593 gnl|TC-DB|Q8KUK6|2.A.66.2.16 CpsU OS=Streptococcus thermophilus GN=cpsU PE=4 SV=1	471	4.023e-88	33	477	471	98.5	99.4	14	14	12.15	MOP	Capsular polysaccharides
CAI97283.1	Q8KUK6	2.A.66.2.16	gnl|BL_ORD_ID|14593 gnl|TC-DB|Q8KUK6|2.A.66.2.16 CpsU OS=Streptococcus thermophilus GN=cpsU PE=4 SV=1	481	5.93834e-75	31	475	471	97.7	98.7	14	14	11.35	MOP	Capsular polysaccharides
CAI97333.1	Q48797	2.A.69.4.5	gnl|BL_ORD_ID|12135 gnl|TC-DB|Q48797|2.A.69.4.5 MALATE PERMEASE - Oenococcus oeni (Leuconostoc oenos).	316	2.53738e-16	25	314	314	96.2	98.1	10	10	8.85	AEC	malate
CAI97059.1	Q9CHU5	2.A.72.1.3	gnl|BL_ORD_ID|15851 gnl|TC-DB|Q9CHU5|2.A.72.1.3 Probable potassium transport system protein kup 1 OS=Lactococcus lactis subsp. lactis (strain IL1403) GN=kup1 PE=3 SV=1	663	0	50	667	670	97.3	96.9	11	11	8.8	KUP	K+
CAI97703.1	G7U9U2	2.A.79.1.3	gnl|BL_ORD_ID|4354 gnl|TC-DB|G7U9U2|2.A.79.1.3 Putative uncharacterized protein OS=Propionibacterium acnes ATCC 11828 GN=TIIST44_11145 PE=4 SV=1	408	5.91878e-59	34	452	440	88.9	90.2	9	10	7.3	ThrE	Threonine
CAI98767.1	Q73PT4	2.A.79.1.5	gnl|BL_ORD_ID|13535 gnl|TC-DB|Q73PT4|2.A.79.1.5 Membrane protein, putative OS=Treponema denticola (strain ATCC 35405 / CIP 103919 / DSM 14222) GN=TDE_0712 PE=4 SV=1	238	9.38367e-39	34	243	260	97.5	89.2	5	5	3	ThrE	Glycine, Alanine
CAI98766.1	W4C0M8	2.A.79.1.7	gnl|BL_ORD_ID|18155 gnl|TC-DB|W4C0M8|2.A.79.1.7 Uncharacterized protein OS=Paenibacillus sp. FSL H8-237 GN=C171_23415 PE=4 SV=1	138	2.48361e-22	31	163	142	84	95.8	4	5	3.4	ThrE	Unknown
CAI97420.1	O32095	2.A.86.1.8	gnl|BL_ORD_ID|6089 gnl|TC-DB|O32095|2.A.86.1.8 UPF0118 membrane protein yueF OS=Bacillus subtilis GN=yueF PE=3 SV=1	360	1.43629e-67	32	378	369	93.1	94.9	7	8	7.45	2.A.86	Unknown
CAI98105.1	O32095	2.A.86.1.8	gnl|BL_ORD_ID|6089 gnl|TC-DB|O32095|2.A.86.1.8 UPF0118 membrane protein yueF OS=Bacillus subtilis GN=yueF PE=3 SV=1	383	1.01115e-29	26	377	369	92.6	96.2	8	8	8	2.A.86	Unknown
CAI97294.1	Q03YI6	2.A.87.2.1	gnl|BL_ORD_ID|10653 gnl|TC-DB|Q03YI6|2.A.87.2.1 Pantothenate transporter PanT OS=Leuconostoc mesenteroides subsp. mesenteroides (strain ATCC 8293 / NCDO 523) GN=panT PE=1 SV=1	194	2.02224e-19	32	207	204	89.9	89.2	6	6	6.05	2.A.87	Pantothenate
CAI98473.1	F3LB58	2.A.98.1.4	gnl|BL_ORD_ID|3799 gnl|TC-DB|F3LB58|2.A.98.1.4 Putative membrane protein OS=Streptococcus porcinus str. Jelinkova 176 GN=STRPO_0189 PE=3 SV=1	341	5.67506e-139	60	341	339	98.8	98.8	11	11	9.05	PSE	Unknown
CAI97544.1	P0ABG7	2.A.103.1.2	gnl|BL_ORD_ID|7499 gnl|TC-DB|P0ABG7|2.A.103.1.2 Rod shape-determining protein rodA - Escherichia coli.	371	4.91089e-49	33	396	370	92.2	93.5	10	9	5	MPE	Lipid II
CAI97591.1	P07373	2.A.103.1.3	gnl|BL_ORD_ID|7247 gnl|TC-DB|P07373|2.A.103.1.3 STAGE V SPORULATION PROTEIN E - Bacillus subtilis.	371	6.02146e-65	35	400	366	91	96.2	10	10	7.85	MPE	Lipid II
CAI98060.1	P39803	2.A.115.1.1	gnl|BL_ORD_ID|8990 gnl|TC-DB|P39803|2.A.115.1.1 UPF0750 membrane protein yitT OS=Bacillus subtilis (strain 168) GN=yitT PE=3 SV=2	273	2.39569e-68	39	294	280	92.5	96.8	5	5	4.45	NbcE	Novobiocin
CAI98082.1	P94357	2.A.115.1.2	gnl|BL_ORD_ID|10298 gnl|TC-DB|P94357|2.A.115.1.2 UPF0750 membrane protein YxkD OS=Bacillus subtilis (strain 168) GN=yxkD PE=3 SV=1	276	9.12362e-51	30	299	278	91	96	5	5	4.3	NbcE	Unknown
CAI98669.1	WP_027108241	2.A.129.1.11	gnl|BL_ORD_ID|18418 gnl|TC-DB|WP_027108241.1|2.A.129.1.11 GtrA family protein [Lacticigenium naphtae]	135	2.60191e-32	39	142	138	94.4	97.1	4	4	3.7	LST	None
CAI97384.1	WP_027108241	2.A.129.1.11	gnl|BL_ORD_ID|18418 gnl|TC-DB|WP_027108241.1|2.A.129.1.11 GtrA family protein [Lacticigenium naphtae]	131	5.23724e-09	27	159	138	81.8	94.2	4	4	3.65	LST	None
CAI98910.1	Q8DU39	3.A.1.2.12	gnl|BL_ORD_ID|14283 gnl|TC-DB|Q8DU39|3.A.1.2.12 Putative ABC sugar transporter, permease protein - Streptococcus mutans.	318	8.3744e-161	67	318	318	99.7	99.7	9	9	8.7	ABC	Deoxyribonucleosides
CAI98909.1	Q8DU38	3.A.1.2.12	gnl|BL_ORD_ID|14282 gnl|TC-DB|Q8DU38|3.A.1.2.12 Putative sugar ABC transporter, permease protein - Streptococcus mutans.	352	2.34576e-115	48	379	358	91.6	98	7	8	6.75	ABC	Deoxyribonucleosides
CAI98907.1	D2BKA1	3.A.1.2.17	gnl|BL_ORD_ID|2715 gnl|TC-DB|D2BKA1|3.A.1.2.17 Basic membrane lipoprotein OS=Lactococcus lactis subsp. lactis (strain KF147) GN=bmpA PE=4 SV=1	356	3.76304e-110	47	361	350	98.3	99.1	1	1	0.85	ABC	Nucleosides
CAI98886.1	D2BKA1	3.A.1.2.17	gnl|BL_ORD_ID|2715 gnl|TC-DB|D2BKA1|3.A.1.2.17 Basic membrane lipoprotein OS=Lactococcus lactis subsp. lactis (strain KF147) GN=bmpA PE=4 SV=1	354	1.92619e-108	48	364	350	97	98.9	3	1	0.85	ABC	Nucleosides
CAI97091.1	P0AEQ6	3.A.1.3.2	gnl|BL_ORD_ID|7574 gnl|TC-DB|P0AEQ6|3.A.1.3.2 Glutamine transport system permease protein glnP - Escherichia coli.	214	5.33615e-37	30	219	219	96.3	97.3	5	5	4.4	ABC	Glutamine
CAI97094.1	P0AEM9	3.A.1.3.10	gnl|BL_ORD_ID|7571 gnl|TC-DB|P0AEM9|3.A.1.3.10 Cystine-binding periplasmic protein - Escherichia coli.	259	2.42051e-27	28	286	266	89.2	95.5	1	1	0.1	ABC	DAP, Cystine
CAI97350.1	A1VZQ3	3.A.1.3.16	gnl|BL_ORD_ID|294 gnl|TC-DB|A1VZQ3|3.A.1.3.16 Amino acid ABC transporter, permease protein PEB1 - Campylobacter jejuni subsp. jejuni serotype O:23/36 (strain 81-176).	204	7.47459e-46	37	213	250	95.3	80.8	5	5	4.6	ABC	aspartate, glutamate
CAI97351.1	A1VZQ3	3.A.1.3.16	gnl|BL_ORD_ID|294 gnl|TC-DB|A1VZQ3|3.A.1.3.16 Amino acid ABC transporter, permease protein PEB1 - Campylobacter jejuni subsp. jejuni serotype O:23/36 (strain 81-176).	205	8.92774e-44	36	222	250	91.9	79.6	5	5	4.2	ABC	aspartate, glutamate
CAI97009.1	Q9A1H0	3.A.1.3.20	gnl|BL_ORD_ID|15706 gnl|TC-DB|Q9A1H0|3.A.1.3.20 Putative glutamine-binding periplasmic protein OS=Streptococcus pyogenes serotype M1 GN=SPy_0277 PE=4 SV=1	518	1.03627e-172	49	527	522	97	98.3	6	5	5.05	ABC	lysine
CAI97121.1	Q2FZR7	3.A.1.5.19	gnl|BL_ORD_ID|11647 gnl|TC-DB|Q2FZR7|3.A.1.5.19 Putative uncharacterized protein - Staphylococcus aureus (strain NCTC 8325).	304	2.92255e-115	51	306	308	99	98.1	7	6	5.1	ABC	Oligopeptides
CAI97862.1	Q2FZR3	3.A.1.5.19	gnl|BL_ORD_ID|11643 gnl|TC-DB|Q2FZR3|3.A.1.5.19 Oligopeptide ABC transporter, substrate-binding protein, putative - Staphylococcus aureus (strain NCTC 8325).	529	4.84156e-111	38	540	551	97.2	95.3	1	1	0.8	ABC	Oligopeptides
CAI97115.1	Q9CIL2	3.A.1.5.25	gnl|BL_ORD_ID|15858 gnl|TC-DB|Q9CIL2|3.A.1.5.25 Oligopeptide ABC transporter substrate binding protein OS=Lactococcus lactis subsp. lactis GN=optA PE=4 SV=1	553	4.10903e-136	42	542	545	99.8	99.8	1	1	0.85	ABC	Oligopeptides, peptides
CAI97046.1	Q9CIL2	3.A.1.5.25	gnl|BL_ORD_ID|15858 gnl|TC-DB|Q9CIL2|3.A.1.5.25 Oligopeptide ABC transporter substrate binding protein OS=Lactococcus lactis subsp. lactis GN=optA PE=4 SV=1	549	5.11506e-128	40	541	545	99.8	99.8	1	1	0.85	ABC	Oligopeptides, peptides
CAI97611.1	Q9CIL2	3.A.1.5.25	gnl|BL_ORD_ID|15858 gnl|TC-DB|Q9CIL2|3.A.1.5.25 Oligopeptide ABC transporter substrate binding protein OS=Lactococcus lactis subsp. lactis GN=optA PE=4 SV=1	557	6.6297e-128	40	549	545	99.8	99.8	1	1	0.9	ABC	Oligopeptides, peptides
CAI97208.1	Q9CIL2	3.A.1.5.25	gnl|BL_ORD_ID|15858 gnl|TC-DB|Q9CIL2|3.A.1.5.25 Oligopeptide ABC transporter substrate binding protein OS=Lactococcus lactis subsp. lactis GN=optA PE=4 SV=1	546	1.65995e-110	37	541	545	99.4	99.4	3	1	0.9	ABC	Oligopeptides, peptides
CAI97122.1	Q9CIL0	3.A.1.5.25	gnl|BL_ORD_ID|15856 gnl|TC-DB|Q9CIL0|3.A.1.5.25 Oligopeptide ABC trasporter permease protein OS=Lactococcus lactis subsp. lactis GN=optC PE=3 SV=1	336	4.88348e-99	48	343	343	95.3	97.1	6	5	4.75	ABC	Oligopeptides, peptides
CAI98185.1	F0TFS8	3.A.1.5.32	gnl|BL_ORD_ID|3693 gnl|TC-DB|F0TFS8|3.A.1.5.32 Oligopeptide transport protein OS=Lactobacillus acidophilus (strain 30SC) GN=LAC30SC_07300 PE=3 SV=1	319	0	78	319	319	99.7	99.7	6	6	6.55	ABC	Alpha-galactosides
CAI98183.1	F0TFS6	3.A.1.5.32	gnl|BL_ORD_ID|3691 gnl|TC-DB|F0TFS6|3.A.1.5.32 Oligopeptide ABC transporter substrate OS=Lactobacillus acidophilus (strain 30SC) GN=LAC30SC_07290 PE=4 SV=1	585	0	67	588	583	99.3	99.1	1	1	0.85	ABC	Alpha-galactosides
CAI98184.1	F0TFS7	3.A.1.5.32	gnl|BL_ORD_ID|3692 gnl|TC-DB|F0TFS7|3.A.1.5.32 Oligopeptide ABC transporter, permease protein OS=Lactobacillus acidophilus (strain 30SC) GN=LAC30SC_07295 PE=3 SV=1	296	8.65981e-163	75	298	310	99	95.2	6	6	6.35	ABC	Alpha-galactosides
CAI97759.1	O51234	3.A.1.7.5	gnl|BL_ORD_ID|6279 gnl|TC-DB|O51234|3.A.1.7.5 Phosphate ABC transporter, permease protein PstC OS=Borrelia burgdorferi (strain ATCC 35210 / B31 / CIP 102532 / DSM 4680) GN=pstC PE=3 SV=1	275	2.0088e-53	36	302	302	90.1	89.1	6	6	6.45	ABC	phosphate
CAI97044.1	P16683	3.A.1.9.1	gnl|BL_ORD_ID|7982 gnl|TC-DB|P16683|3.A.1.9.1 Phosphonates transport system permease protein phnE - Escherichia coli.	252	1.90902e-48	35	266	259	94	95.4	6	6	4.35	ABC	Fe3+
CAI97045.1	P16683	3.A.1.9.1	gnl|BL_ORD_ID|7982 gnl|TC-DB|P16683|3.A.1.9.1 Phosphonates transport system permease protein phnE - Escherichia coli.	249	2.54215e-43	34	270	259	90.7	92.7	6	6	4.25	ABC	Fe3+
CAI98902.1	Q1M7Q3	3.A.1.11.6	gnl|BL_ORD_ID|11451 gnl|TC-DB|Q1M7Q3|3.A.1.11.6 Putative spermidine/putrescine transport system ABC transporter permease protein OS=Rhizobium leguminosarum bv. viciae (strain 3841) GN=pRL100249 PE=3 SV=1	260	2.41954e-43	28	276	290	93.5	89.3	6	6	6.5	ABC	Gamma-aminobutyric acid
CAI98903.1	Q1M7Q2	3.A.1.11.6	gnl|BL_ORD_ID|11450 gnl|TC-DB|Q1M7Q2|3.A.1.11.6 Putative spermidine/putrescine transport system ABC transporter permease component OS=Rhizobium leguminosarum bv. viciae (strain 3841) GN=pRL100250 PE=3 SV=1	248	7.44419e-38	29	262	266	93.9	92.5	6	6	6.55	ABC	Gamma-aminobutyric acid
CAI97479.1	Q97Q45	3.A.1.11.7	gnl|BL_ORD_ID|15591 gnl|TC-DB|Q97Q45|3.A.1.11.7 Spermidine/putrescine ABC transporter, spermidine/putrescine-binding protein OS=Streptococcus pneumoniae serotype 4 (strain ATCC BAA-334 / TIGR4) GN=potD PE=4 SV=1	359	3.84681e-141	54	360	356	99.4	99.7	1	1	0.85	ABC	Spermidine, Putrescine
CAI97478.1	Q97Q44	3.A.1.11.7	gnl|BL_ORD_ID|15590 gnl|TC-DB|Q97Q44|3.A.1.11.7 Spermidine/putrescine ABC transporter, permease protein OS=Streptococcus pneumoniae serotype 4 (strain ATCC BAA-334 / TIGR4) GN=potC PE=3 SV=1	259	7.4085e-113	61	267	257	96.6	99.6	6	7	5.85	ABC	Spermidine, Putrescine
CAI97477.1	Q97Q43	3.A.1.11.7	gnl|BL_ORD_ID|15589 gnl|TC-DB|Q97Q43|3.A.1.11.7 Spermidine/putrescine ABC transporter, permease protein OS=Streptococcus pneumoniae serotype 4 (strain ATCC BAA-334 / TIGR4) GN=potH PE=3 SV=1	266	2.18342e-112	60	270	275	97.4	96.4	6	6	5.2	ABC	Spermidine, Putrescine
CAI97982.1	Q93A34	3.A.1.12.8	gnl|BL_ORD_ID|15316 gnl|TC-DB|Q93A34|3.A.1.12.8 BilEB - Listeria monocytogenes.	507	4.17045e-162	47	506	504	99.8	99.6	6	6	5.7	ABC	Glycine betaine, Proline
CAI98775.1	O33704	3.A.1.15.3	gnl|BL_ORD_ID|6118 gnl|TC-DB|O33704|3.A.1.15.3 ADCB PROTEIN - Streptococcus pneumoniae.	257	3.33877e-32	25	265	268	95.8	95.5	7	7	6.45	ABC	Zn2+
CAI97621.1	Q04MS5	3.A.1.24.6	gnl|BL_ORD_ID|10690 gnl|TC-DB|Q04MS5|3.A.1.24.6 ABC transporter, permease protein, putative OS=Streptococcus pneumoniae serotype 2 (strain D39 / NCTC 7466) GN=SPD_0154 PE=3 SV=1	222	4.51543e-88	57	237	230	93.2	95.7	5	5	4.9	ABC	peptides
CAI97670.1	Q8Y5W0	3.A.1.25.8	gnl|BL_ORD_ID|15131 gnl|TC-DB|Q8Y5W0|3.A.1.25.8 Riboflavin transporter OS=Listeria monocytogenes serovar 1/2a (strain ATCC BAA-679 / EGD-e) GN=lmo1945 PE=3 SV=1	211	1.70066e-22	32	234	203	89.3	87.2	5	5	4.2	ABC	None
CAI97777.1	Q8Y456	3.A.1.25.8	gnl|BL_ORD_ID|15126 gnl|TC-DB|Q8Y456|3.A.1.25.8 Energy-coupling factor transporter transmembrane protein EcfT OS=Listeria monocytogenes serovar 1/2a (strain ATCC BAA-679 / EGD-e) OX=169963 GN=ecfT PE=3 SV=1	250	1.27877e-18	28	258	265	92.2	92.1	5	5	3.7	ABC	None
CAI98414.1	Q03S56	3.A.1.26.9	gnl|BL_ORD_ID|10651 gnl|TC-DB|Q03S56|3.A.1.26.9 Uncharacterized protein OS=Lactobacillus brevis (strain ATCC 367 / JCM 1170) GN=LVIS_0823 PE=4 SV=1	166	7.2975e-39	38	176	177	93.2	92.1	4	5	3.55	ABC	folate
CAI98413.1	Q03S56	3.A.1.26.9	gnl|BL_ORD_ID|10651 gnl|TC-DB|Q03S56|3.A.1.26.9 Uncharacterized protein OS=Lactobacillus brevis (strain ATCC 367 / JCM 1170) GN=LVIS_0823 PE=4 SV=1	166	3.3974e-34	36	176	177	93.2	92.1	4	5	3.05	ABC	folate
CAI97085.1	Q03S56	3.A.1.26.9	gnl|BL_ORD_ID|10651 gnl|TC-DB|Q03S56|3.A.1.26.9 Uncharacterized protein OS=Lactobacillus brevis (strain ATCC 367 / JCM 1170) GN=LVIS_0823 PE=4 SV=1	58	1.08413e-12	45	60	177	95	32.2	2	5	1.4	ABC	folate
CAI97261.1	I7BV49	3.A.1.26.10	gnl|BL_ORD_ID|4836 gnl|TC-DB|I7BV49|3.A.1.26.10 Energy-coupling factor transporter transmembrane protein EcfT OS=Enterococcus faecalis D32 GN=ecfT PE=3 SV=1	263	4.3334e-101	53	265	264	98.9	99.2	6	6	4.5	ABC	Folic acid
CAI97778.1	Q8XGV9	3.A.1.28.1	gnl|BL_ORD_ID|15109 gnl|TC-DB|Q8XGV9|3.A.1.28.1 Putative membrane protein OS=Salmonella typhi GN=STY3230 PE=4 SV=1	180	1.98207e-27	29	211	192	84.8	92.7	5	5	4.5	ABC	Queuosine
CAI98495.1	Q03NM0	3.A.1.28.2	gnl|BL_ORD_ID|10642 gnl|TC-DB|Q03NM0|3.A.1.28.2 Predicted membrane protein OS=Lactobacillus brevis (strain ATCC 367 / JCM 1170) OX=387344 GN=LVIS_2151 PE=1 SV=1	152	1.14123e-15	32	167	166	88	90.4	4	4	3.9	ABC	folate, Hydroxymethyl pyrimidine
CAI98497.1	Q74I61	3.A.1.29.1	gnl|BL_ORD_ID|13588 gnl|TC-DB|Q74I61|3.A.1.29.1 ABC transporter permease component OS=Lactobacillus johnsonii GN=LJ_1705 PE=4 SV=1	275	3.86705e-131	63	275	276	99.3	99.3	6	6	5.25	ABC	Methionine precursors
CAI98499.1	Q74I63	3.A.1.29.1	gnl|BL_ORD_ID|13590 gnl|TC-DB|Q74I63|3.A.1.29.1 UPF0397 protein LJ_1703 OS=Lactobacillus johnsonii GN=LJ_1703 PE=3 SV=1	179	4.00046e-75	54	186	185	95.7	96.2	5	5	5.1	ABC	Methionine precursors
CAI97344.1	Q97RS4	3.A.1.30.2	gnl|BL_ORD_ID|15595 gnl|TC-DB|Q97RS4|3.A.1.30.2 Putative uncharacterized protein OS=Streptococcus pneumoniae serotype 4 (strain ATCC BAA-334 / TIGR4) GN=SP_0719 PE=4 SV=1	177	1.32602e-33	35	189	186	93.1	93	6	4	3.15	ABC	thiamin
CAI96990.1	Q97RS2	3.A.1.30.2	gnl|BL_ORD_ID|15593 gnl|TC-DB|Q97RS2|3.A.1.30.2 Putative uncharacterized protein OS=Streptococcus pneumoniae serotype 4 (strain ATCC BAA-334 / TIGR4) GN=SP_0721 PE=4 SV=1	209	4.52287e-19	28	217	216	95.4	94	5	6	3.8	ABC	thiamin
CAI96939.1	WP_109207852	3.A.1.32.4	gnl|BL_ORD_ID|18958 gnl|TC-DB|WP_109207852|3.A.1.32.4 ECF transporter S component [Moorella sp. Hama-1]	176	1.24576e-18	29	182	249	92.9	67.9	5	7	4.2	ABC	None
CAI97461.1	Q99ZY4	3.A.1.34.1	gnl|BL_ORD_ID|15696 gnl|TC-DB|Q99ZY4|3.A.1.34.1 ABC transporter permease protein OS=Streptococcus pyogenes serotype M1 GN=M5005_Spy0745 PE=4 SV=1	299	1.55532e-91	51	300	289	98.3	98.6	9	8	6.75	ABC	tryptophan
CAI98706.1	Q99ZY6	3.A.1.34.1	gnl|BL_ORD_ID|15697 gnl|TC-DB|Q99ZY6|3.A.1.34.1 ABC transporter substrate-binding protein OS=Streptococcus pyogenes serotype M1 GN=M5005_Spy0743 PE=4 SV=1	318	4.72148e-45	29	329	332	96	94	1	1	0.65	ABC	tryptophan
CAI98644.1	P60752	3.A.1.106.1	gnl|BL_ORD_ID|9754 gnl|TC-DB|P60752|3.A.1.106.1 Lipid A export ATP-binding/permease protein msbA - Escherichia coli.	533	1.72642e-37	27	531	582	95.3	88.7	7	5	4.35	ABC	phospholipids, LPS, Lipid A, drugs
CAI98154.1	O07550	3.A.1.106.8	gnl|BL_ORD_ID|5831 gnl|TC-DB|O07550|3.A.1.106.8 Probable multidrug resistance ABC transporter ATP-binding/permease protein yheI OS=Bacillus subtilis GN=yheI PE=1 SV=1	571	6.95168e-176	45	586	585	97.3	97.1	6	6	5.75	ABC	doxorubicin, mitoxantrone, ethidium, Hoechst 33342
CAI96876.1	O06967	3.A.1.117.3	gnl|BL_ORD_ID|5810 gnl|TC-DB|O06967|3.A.1.117.3 Multidrug resistance ABC transporter ATP-binding/permease protein BmrA OS=Bacillus subtilis (strain 168) GN=bmrA PE=1 SV=1	559	1.98982e-119	36	569	589	97.9	93.5	7	6	5.75	ABC	drugs
CAI98808.1	H2GZC4	3.A.1.122.11	gnl|BL_ORD_ID|4542 gnl|TC-DB|H2GZC4|3.A.1.122.11 ABC transporter system involved in hemin toxicity inner membrane protein OS=Corynebacterium diphtheriae (strain ATCC 27012 / C7 (beta)) GN=hrtB PE=4 SV=1	359	1.1147e-20	25	352	344	99.4	98.8	4	4	2.85	ABC	Hemin
CAI98866.1	Q03RZ6	3.A.1.122.13	gnl|BL_ORD_ID|10650 gnl|TC-DB|Q03RZ6|3.A.1.122.13 ABC-type antimicrobial peptide transport system, ATPase component - Lactobacillus brevis (strain ATCC 367 / JCM 1170)	683	3.27153e-128	36	665	667	99.4	99.4	5	5	4.95	ABC	Antimicrobial peptides
CAI97891.1	Q8Y5E9	3.A.1.134.12	gnl|BL_ORD_ID|15127 gnl|TC-DB|Q8Y5E9|3.A.1.134.12 Lmo2115 protein OS=Listeria monocytogenes serovar 1/2a (strain ATCC BAA-679 / EGD-e) GN=lmo2115 PE=4 SV=1	654	2.74449e-42	23	624	646	98.6	98.9	10	10	7.45	ABC	Beta-lactam antibiotics, Nisin, Gallidermin, Bacitracin
CAI97920.1	Q8Y5E9	3.A.1.134.12	gnl|BL_ORD_ID|15127 gnl|TC-DB|Q8Y5E9|3.A.1.134.12 Lmo2115 protein OS=Listeria monocytogenes serovar 1/2a (strain ATCC BAA-679 / EGD-e) GN=lmo2115 PE=4 SV=1	654	2.74449e-42	23	624	646	98.6	98.9	10	10	7.45	ABC	Beta-lactam antibiotics, Nisin, Gallidermin, Bacitracin
CAI98089.1	E2YHZ7	3.A.1.135.7	gnl|BL_ORD_ID|3303 gnl|TC-DB|E2YHZ7|3.A.1.135.7 ABC transporter, ATP-binding protein OS=Enterococcus faecalis DAPTO 512 GN=HMPREF9492_00064 PE=4 SV=1	584	4.28433e-143	40	590	589	97.8	98.3	5	7	4.3	ABC	norfloxacin, Ciprofloxacin, Doxycycline, acriflavine, 4,6-diamidino-2-phenylindole, TPP chloride, daunorubicin, doxorubicin
CAI97952.1	Q837P4	3.A.1.135.8	gnl|BL_ORD_ID|14002 gnl|TC-DB|Q837P4|3.A.1.135.8 ABC transporter, ATP-binding/permease protein OS=Enterococcus faecalis (strain ATCC 700802 / V583) GN=EF_0790 PE=4 SV=1	589	0	52	585	589	99.8	99.8	5	5	4.3	ABC	daunorubicin, doxorubicin, ethidium, Hoechst 33342, Fluoroquinolones
CAI97951.1	Q837P5	3.A.1.135.8	gnl|BL_ORD_ID|14003 gnl|TC-DB|Q837P5|3.A.1.135.8 ABC transporter, ATP-binding/permease protein OS=Enterococcus faecalis (strain ATCC 700802 / V583) GN=EF_0789 PE=4 SV=1	570	0	50	575	571	99	99.5	6	6	5.9	ABC	daunorubicin, doxorubicin, ethidium, Hoechst 33342, Fluoroquinolones
CAI98785.1	A4XGX1	3.A.1.135.10	gnl|BL_ORD_ID|536 gnl|TC-DB|A4XGX1|3.A.1.135.10 ABC transporter related protein OS=Caldicellulosiruptor saccharolyticus (strain ATCC 43494 / DSM 8903 / Tp8T 6331) OX=351627 GN=Csac_0522 PE=4 SV=1	594	2.04785e-148	41	603	615	98.3	91.7	7	5	4.5	ABC	None
CAI98090.1	A4XGX0	3.A.1.135.10	gnl|BL_ORD_ID|535 gnl|TC-DB|A4XGX0|3.A.1.135.10 ABC transporter related protein OS=Caldicellulosiruptor saccharolyticus (strain ATCC 43494 / DSM 8903 / Tp8T 6331) OX=351627 GN=Csac_0521 PE=4 SV=1	573	3.13131e-134	38	580	578	97.8	99	6	7	5.85	ABC	None
CAI96880.1	P77307	3.A.1.139.2	gnl|BL_ORD_ID|10106 gnl|TC-DB|P77307|3.A.1.139.2 UPF0014 inner membrane protein ybbM OS=Escherichia coli (strain K12) GN=ybbM PE=1 SV=2	251	5.97898e-95	58	255	259	98	96.5	7	7	6.45	ABC	Fe2+
CAI96996.1	Q8R6Q6	3.A.1.141.2	gnl|BL_ORD_ID|14808 gnl|TC-DB|Q8R6Q6|3.A.1.141.2 Putative uncharacterized protein OS=Thermoanaerobacter tengcongensis GN=TTE2734 PE=4 SV=1	253	2.75564e-25	26	254	257	98	98.1	7	6	5.45	ABC	Unknown
CAI96995.1	Q8R6Q5	3.A.1.141.2	gnl|BL_ORD_ID|14807 gnl|TC-DB|Q8R6Q5|3.A.1.141.2 ABC-type multidrug transport system, permease component OS=Thermoanaerobacter tengcongensis GN=TTE2735 PE=4 SV=1	263	3.91018e-20	25	248	263	99.2	98.9	6	6	4.25	ABC	Unknown
CAI98326.1	P55340	3.A.1.143.1	gnl|BL_ORD_ID|9634 gnl|TC-DB|P55340|3.A.1.143.1 Protein ecsB OS=Bacillus subtilis (strain 168) GN=ecsB PE=4 SV=1	419	6.28356e-41	29	405	408	99.8	98.8	10	10	7.5	ABC	proteins
CAI97288.1	Q04JJ5	3.A.3.2.28	gnl|BL_ORD_ID|10689 gnl|TC-DB|Q04JJ5|3.A.3.2.28 Cation-transporting ATPase, E1-E2 family protein OS=Streptococcus pneumoniae serotype 2 (strain D39 / NCTC 7466) GN=SPD_1383 PE=3 SV=1	891	0	60	888	898	98.8	98	10	10	8.6	P-ATPase	Ca2+, Mn2+
CAI98102.1	Q9X6G0	3.A.3.3.3	gnl|BL_ORD_ID|17225 gnl|TC-DB|Q9X6G0|3.A.3.3.3 Cadmium/manganese transport ATPase - Lactobacillus plantarum.	726	0	50	752	758	95.6	95.6	9	9	6	P-ATPase	Mn2+, Cd2+
CAI97179.1	I4G6G7	3.A.3.4.5	gnl|BL_ORD_ID|4798 gnl|TC-DB|I4G6G7|3.A.3.4.5 Magnesium-transporting ATPase, P-type 1 OS=Microcystis aeruginosa PCC 9443 OX=1160281 GN=mgtA PE=4 SV=1	913	0	43	896	912	99.2	96.9	9	8	5.4	P-ATPase	None
CAI98041.1	P05425	3.A.3.5.2	gnl|BL_ORD_ID|7183 gnl|TC-DB|P05425|3.A.3.5.2 PROBABLE COPPER EXPORTING ATPASE B (EC 3.6.3.4) - Enterococcus hirae.	760	0	51	762	745	98.8	99.7	9	8	5.05	P-ATPase	Cu+, Ag+
CAI97489.1	Q5X2N1	3.A.3.5.30	gnl|BL_ORD_ID|12892 gnl|TC-DB|Q5X2N1|3.A.3.5.30 Putative uncharacterized protein copA1 OS=Legionella pneumophila (strain Paris) GN=copA1 PE=3 SV=1	655	2.04351e-166	44	638	736	97.2	88	8	8	5.25	P-ATPase	Cu+
CAI98882.1	Q830Z1	3.A.3.25.3	gnl|BL_ORD_ID|13998 gnl|TC-DB|Q830Z1|3.A.3.25.3 Cadmium-translocating P-type ATPase - Enterococcus faecalis (Streptococcus faecalis).	597	0	47	604	601	98	99.2	6	7	5.05	P-ATPase	cations
CAI97251.1	P16336	3.A.5.2.1	gnl|BL_ORD_ID|7965 gnl|TC-DB|P16336|3.A.5.2.1 PREPROTEIN TRANSLOCASE SECY SUBUNIT - Bacillus subtilis.	435	7.24701e-133	47	431	431	99.8	99.5	10	10	9	Sec	proteins
CAI98205.1	Q8L1C6	3.A.7.14.1	gnl|BL_ORD_ID|14607 gnl|TC-DB|Q8L1C6|3.A.7.14.1 Putative uncharacterized protein - Enterococcus faecalis (Streptococcus faecalis).	139	1.11691e-08	31	191	282	68.6	47.5	1	2	0.85	IVSP	DNA
CAI97295.1	Q15HU6	3.A.7.14.2	gnl|BL_ORD_ID|11210 gnl|TC-DB|Q15HU6|3.A.7.14.2 TcpG - Clostridium perfringens.	157	7.32491e-28	38	217	334	71	45.8	1	1	0.35	IVSP	DNA
CAI97597.1	P39695	3.A.11.1.1	gnl|BL_ORD_ID|8978 gnl|TC-DB|P39695|3.A.11.1.1 COME OPERON PROTEIN 3 - Bacillus subtilis.	756	3.35095e-86	29	728	776	97.3	95.9	13	12	3.75	DNA-T	ssDNA
CAI97423.1	P21458	3.A.12.1.1	gnl|BL_ORD_ID|8100 gnl|TC-DB|P21458|3.A.12.1.1 Stage III sporulation protein E - Bacillus subtilis.	797	0	45	772	787	99	99.4	4	4	3.2	S-DNA-T	DNA
CAI98778.1	Q1LZ59	4.A.2.1.7	gnl|BL_ORD_ID|11441 gnl|TC-DB|Q1LZ59|4.A.2.1.7 Inducible fructose permease - Streptococcus mutans UA159.	669	0	49	656	655	99.2	99.5	10	10	10.25	Fru	fructose, Xylitol
CAI97373.1	Q9CJ32	4.A.3.2.4	gnl|BL_ORD_ID|15861 gnl|TC-DB|Q9CJ32|4.A.3.2.4 Cellobiose-specific PTS system IIC component - Lactococcus lactis subsp. lactis (Streptococcus lactis).	487	9.73041e-83	33	436	494	96.8	98.2	10	9	4.9	Lac	Cellobiose
CAI98861.1	C4X745	4.A.3.2.7	gnl|BL_ORD_ID|2317 gnl|TC-DB|C4X745|4.A.3.2.7 PEP-dependent phosphotransferase enzyme II OS=Klebsiella pneumoniae subsp. pneumoniae NTUH-K2044 GN=celB PE=4 SV=1	471	7.30957e-23	23	438	452	98.4	95.8	10	10	9.05	Lac	N,N'-diacetylchitobiose
CAI98572.1	Q04GJ9	4.A.6.1.10	gnl|BL_ORD_ID|10686 gnl|TC-DB|Q04GJ9|4.A.6.1.10 PTS system IID component, Man family OS=Oenococcus oeni (strain BAA-331 / PSU-1) GN=OEOE_0466 PE=4 SV=1	304	1.60813e-165	72	304	304	99.7	99.7	4	4	3.1	Man	glucose, fructose
CAI98573.1	Q04GK0	4.A.6.1.10	gnl|BL_ORD_ID|10687 gnl|TC-DB|Q04GK0|4.A.6.1.10 Mannose-specific PTS system component IIC OS=Oenococcus oeni (strain BAA-331 / PSU-1) GN=OEOE_0465 PE=4 SV=1	271	5.39698e-138	73	270	271	98.9	99.6	7	7	6.15	Man	glucose, fructose
CAI98574.1	Q04GK1	4.A.6.1.10	gnl|BL_ORD_ID|10688 gnl|TC-DB|Q04GK1|4.A.6.1.10 Phosphotransferase system, mannose/fructose-specific component IIA OS=Oenococcus oeni (strain BAA-331 / PSU-1) GN=OEOE_0464 PE=4 SV=1	335	1.43241e-134	59	339	331	98.2	99.7	1	1	0.8	Man	glucose, fructose
CAI96912.1	Q55487	4.D.1.1.14	gnl|BL_ORD_ID|12444 gnl|TC-DB|Q55487|4.D.1.1.14 Uncharacterized glycosyltransferase sll0501 OS=Synechocystis sp. (strain PCC 6803 / Kazusa) GN=sll0501 PE=3 SV=1	303	1.52923e-81	41	315	318	95.9	94.7	2	2	2.3	VGP	None
CAI97428.1	Q6ADZ6	4.F.1.1.7	gnl|BL_ORD_ID|13063 gnl|TC-DB|Q6ADZ6|4.F.1.1.7 CDP-diacylglycerol--glycerol-3-phosphate 3-phosphatidyltransferase OS=Leifsonia xyli subsp. xyli (strain CTCB07) GN=pgsA PE=3 SV=1	193	3.79563e-33	38	187	189	97.9	93.1	4	5	2.95	CEPT1	phosphate
CAI98223.1	Q8Y433	5.B.14.1.1	gnl|BL_ORD_ID|15119 gnl|TC-DB|Q8Y433|5.B.14.1.1 Lmo2641 protein OS=Listeria monocytogenes serovar 1/2a (strain ATCC BAA-679 / EGD-e) OX=169963 GN=lmo2641 PE=3 SV=1	248	7.53937e-13	23	287	326	85.7	73.9	1	1	0	F-EET	None
CAI98748.1	P39850	8.A.3.2.1	gnl|BL_ORD_ID|8997 gnl|TC-DB|P39850|8.A.3.2.1 CAPA protein - Staphylococcus aureus.	246	3.29365e-31	32	279	221	87.1	97.3	3	2	0.8	MPA1-C or MPA1+C	NONE
CAI97573.1	Q81WE1	9.A.4.2.1	gnl|BL_ORD_ID|13978 gnl|TC-DB|Q81WE1|9.A.4.2.1 YlmG protein - Bacillus anthracis.	77	9.8773e-08	38	100	87	75	81.6	2	2	1.9	FkuB	Unknown
CAI97276.1	Q9K7V5	9.A.23.1.1	gnl|BL_ORD_ID|16277 gnl|TC-DB|Q9K7V5|9.A.23.1.1 BH3254 protein OS=Bacillus halodurans GN=BH3254 PE=4 SV=1	349	1.12299e-25	23	351	336	96.9	95.2	10	8	6.6	NNT	Niacin, Nicotinamide
CAI96863.1	P0AFV2	9.B.20.1.4	gnl|BL_ORD_ID|7629 gnl|TC-DB|P0AFV2|9.B.20.1.4 Putative magnesium transporter YhiD OS=Escherichia coli (strain K12) GN=yhiD PE=3 SV=1	216	3.53767e-44	37	234	215	91.9	97.7	4	4	2.8	MgtC	Mg2+
CAI98376.1	P0ABP6	9.B.27.2.3	gnl|BL_ORD_ID|7516 gnl|TC-DB|P0ABP6|9.B.27.2.3 Protein dedA OS=Escherichia coli (strain K12) GN=dedA PE=1 SV=1	213	1.57264e-61	44	219	219	95.9	95.4	5	6	4.35	DedA	Selenite
CAI97995.1	D6GX19	9.B.27.2.5	gnl|BL_ORD_ID|3019 gnl|TC-DB|D6GX19|9.B.27.2.5 SNARE associated protein OS=Candidatus Parvarchaeum acidophilus ARMAN-5 GN=BJBARM5_1043 PE=4 SV=1	202	3.28711e-22	29	204	206	96.6	95.1	4	5	3.65	DedA	Unknown
CAI97794.1	Q45064	9.B.31.1.2	gnl|BL_ORD_ID|11995 gnl|TC-DB|Q45064|9.B.31.1.2 Glycerol-3-phosphate acyltransferase OS=Bacillus subtilis (strain 168) GN=plsY PE=1 SV=1	189	2.48028e-55	51	212	193	88.2	96.4	5	5	3.85	PlsY	Unknown
CAI97823.1	B8I766	9.B.105.1.5	gnl|BL_ORD_ID|1948 gnl|TC-DB|B8I766|9.B.105.1.5 Lipoprotein signal peptidase OS=Clostridium cellulolyticum (strain ATCC 35319 / DSM 5812 / JCM 6584 / H10) GN=lspA PE=3 SV=1	147	1.60175e-17	32	150	163	95.3	87.7	4	3	2.75	PbrBC	Unknown
CAI97387.1	D0DT64	9.B.126.2.5	gnl|BL_ORD_ID|2616 gnl|TC-DB|D0DT64|9.B.126.2.5 YihY family protein OS=Lactobacillus fermentum 28-3-CHN GN=HMPREF0513_00853 PE=4 SV=1	278	5.75012e-45	31	304	299	90.8	90.6	6	6	5	YhjD	Unknown
CAI97029.1	C7TAQ3	9.B.141.1.3	gnl|BL_ORD_ID|2473 gnl|TC-DB|C7TAQ3|9.B.141.1.3 Uncharacterized protein OS=Lactobacillus rhamnosus (strain ATCC 53103 / GG) GN=LRHM_0777 PE=4 SV=1	353	3.61493e-53	31	369	355	95.4	96.1	8	9	4.95	YibE/F	Unknown
CAI98284.1	WP_071420629	9.B.144.1.6	gnl|BL_ORD_ID|18686 gnl|TC-DB|WP_071420629.1|9.B.144.1.6 hypothetical protein, partial [Oenococcus oeni]	829	7.58334e-117	32	832	844	96.5	96.4	11	15	5.85	DUF3367	None
CAI97566.1	P0A6W3	9.B.146.1.6	gnl|BL_ORD_ID|7405 gnl|TC-DB|P0A6W3|9.B.146.1.6 Phospho-N-acetylmuramoyl-pentapeptide-transferase OS=Escherichia coli (strain K12) GN=mraY PE=1 SV=1	326	6.31131e-69	40	319	360	95.6	89.4	10	10	6.15	MurG	Unknown
CAI98140.1	O31754	9.B.149.2.1	gnl|BL_ORD_ID|6077 gnl|TC-DB|O31754|9.B.149.2.1 Regulator of sigma-W protease RasP OS=Bacillus subtilis (strain 168) GN=rasP PE=1 SV=1	421	2.31887e-91	38	415	422	99.5	99.3	5	4	2.75	M50-P	None
CAI97541.1	Q01465	9.B.157.1.1	gnl|BL_ORD_ID|10509 gnl|TC-DB|Q01465|9.B.157.1.1 Rod shape-determining protein MreB OS=Bacillus subtilis (strain 168) GN=mreB PE=3 SV=3	324	1.33981e-126	53	329	337	97.6	95.8	1	1	0.45	MreBCD	Folic acid
CAI97559.1	Q01466	9.B.157.1.1	gnl|BL_ORD_ID|10510 gnl|TC-DB|Q01466|9.B.157.1.1 Cell shape-determining protein MreC OS=Bacillus subtilis (strain 168) GN=mreC PE=1 SV=3	272	1.05394e-40	33	274	290	96.4	92.1	1	1	0.75	MreBCD	Folic acid
CAI98788.1	Q03CJ3	9.B.182.1.1	gnl|BL_ORD_ID|10641 gnl|TC-DB|Q03CJ3|9.B.182.1.1 Uncharacterized membrane-bound protein conserved in bacteria OS=Lactobacillus casei (strain ATCC 334) GN=LSEI_0216 PE=4 SV=1	243	1.90123e-38	33	256	273	92.2	86.4	4	4	3.4	DUF1129	Unknown
CAI97978.1	P50738	9.B.217.1.1	gnl|BL_ORD_ID|9456 gnl|TC-DB|P50738|9.B.217.1.1 Protease PrsW OS=Bacillus subtilis (strain 168) GN=prsW PE=1 SV=1	222	3.27552e-23	31	250	218	86.8	94	7	5	3.9	PrsW	None
CAI98141.1	WP_102961726	9.B.273.1.2	gnl|BL_ORD_ID|18931 gnl|TC-DB|WP_102961726.1|9.B.273.1.2 phosphatidate cytidylyltransferase [Burkholderia cenocepacia]	284	1.70647e-27	32	265	273	99.2	99.3	8	7	6	PCT	None
CAI98433.1	WP_116717487	9.B.306.1.3	gnl|BL_ORD_ID|18994 gnl|TC-DB|WP_116717487|9.B.306.1.3 class A beta-lactamase-related serine hydrolase [Anaerolineales bacterium]	362	5.36732e-11	23	372	514	91.7	67.1	1	6	0.85	CBP	None
CAI97206.1	P0AAI3	9.B.307.1.2	gnl|BL_ORD_ID|7471 gnl|TC-DB|P0AAI3|9.B.307.1.2 ATP-dependent zinc metalloprotease FtsH OS=Escherichia coli (strain K12) OX=83333 GN=ftsH PE=1 SV=1	620	1.85697e-167	45	737	644	83	91.6	2	2	0.9	FtsH	None
CAI98097.1	WP_119906339	9.B.318.1.5	gnl|BL_ORD_ID|19002 gnl|TC-DB|WP_119906339.1|9.B.318.1.5 hypothetical protein [Lactobacillus delbrueckii]	451	0	98	451	445	99.8	99.8	7	7	7.65	DUF898	None
CAI97441.1	WP_063487264	9.B.330.4.2	gnl|BL_ORD_ID|18626 gnl|TC-DB|WP_063487264.1|9.B.330.4.2 prolipoprotein diacylglyceryl transferase [Lactobacillus plantarum]	269	2.22917e-91	48	277	272	96.4	96.3	7	7	4.85	DUF4013	None
CAI97023.1	D6ZSR9	1.A.1.5.25	gnl|BL_ORD_ID|3056 gnl|TC-DB|D6ZSR9|1.A.1.5.25 Putative transcriptional regulator, Crp/Fnr family OS=Bifidobacterium longum subsp. longum (strain JDM301) GN=BLJ_0448 PE=4 SV=1	221	2.58372e-11	24	216	239	97.7	91.2	0	0	None	VIC	Unknown
CAI98114.1	G4NXA5	1.A.33.1.4	gnl|BL_ORD_ID|4272 gnl|TC-DB|G4NXA5|1.A.33.1.4 Chaperone protein DnaK OS=Bacillus subtilis subsp. spizizenii TU-B-10 GN=dnaK PE=3 SV=1	614	0	72	614	611	99.8	99.3	0	0	None	Hsp70	ions
CAI98454.1	Q9ZK21	1.C.82.1.1	gnl|BL_ORD_ID|17436 gnl|TC-DB|Q9ZK21|1.C.82.1.1 50S ribosomal protein L1 - Helicobacter pylori J99 (Campylobacter pylori J99).	225	5.16834e-84	54	231	234	97	95.7	0	0	None	HP2-20	small molecules
CAI98222.1	J8IXD8	1.C.109.1.5	gnl|BL_ORD_ID|4937 gnl|TC-DB|J8IXD8|1.C.109.1.5 Hemolysin TlyA family protein OS=Bacillus cereus VD078 GN=III_01305 PE=4 SV=1	265	7.28812e-100	58	271	279	97	94.3	0	0	None	B-Hemolysin A	small molecules
CAI97395.1	P0A2L3	1.C.126.1.2	gnl|BL_ORD_ID|7358 gnl|TC-DB|P0A2L3|1.C.126.1.2 Magnesium and cobalt efflux protein corC - Salmonella typhimurium.	242	1.67185e-43	33	285	292	84.2	82.2	0	1	None	HlyC	None
CAI97701.1	Q6MMK1	2.A.6.6.11	gnl|BL_ORD_ID|13241 gnl|TC-DB|Q6MMK1|2.A.6.6.11 3-hydroxy-3-methylglutaryl coenzyme A reductase OS=Bdellovibrio bacteriovorus (strain ATCC 15356 / DSM 50701 / NCIB 9529 / HD100) GN=Bd1627 PE=3 SV=1	389	2.59852e-67	35	394	438	94.4	85.4	0	1	None	RND	Electrons
CAI98870.1	P39579	2.A.50.2.1	gnl|BL_ORD_ID|8964 gnl|TC-DB|P39579|2.A.50.2.1 D-alanyl carrier protein OS=Bacillus subtilis (strain 168) OX=224308 GN=dltC PE=1 SV=1	78	5.8157e-23	45	80	78	95	98.7	0	0	None	GUP	Alanine
CAI98908.1	Q8DU37	3.A.1.2.12	gnl|BL_ORD_ID|14281 gnl|TC-DB|Q8DU37|3.A.1.2.12 Putative sugar ABC transporter, ATP-binding protein - Streptococcus mutans.	504	0	63	514	510	97.9	98.6	0	0	None	ABC	Deoxyribonucleosides
CAI98894.1	D2BKA1	3.A.1.2.17	gnl|BL_ORD_ID|2715 gnl|TC-DB|D2BKA1|3.A.1.2.17 Basic membrane lipoprotein OS=Lactococcus lactis subsp. lactis (strain KF147) GN=bmpA PE=4 SV=1	351	2.60578e-106	45	365	350	95.9	98.3	0	1	None	ABC	Nucleosides
CAI97348.1	P0AAG3	3.A.1.3.4	gnl|BL_ORD_ID|7465 gnl|TC-DB|P0AAG3|3.A.1.3.4 Glutamate/aspartate transport ATP-binding protein gltL - Escherichia coli.	242	2.39302e-90	57	246	241	97.6	99.2	0	0	None	ABC	glutamate
CAI97093.1	P0AAG3	3.A.1.3.4	gnl|BL_ORD_ID|7465 gnl|TC-DB|P0AAG3|3.A.1.3.4 Glutamate/aspartate transport ATP-binding protein gltL - Escherichia coli.	237	1.06192e-76	48	246	241	95.9	97.5	0	0	None	ABC	glutamate
CAI97008.1	Q9A1H1	3.A.1.3.20	gnl|BL_ORD_ID|15707 gnl|TC-DB|Q9A1H1|3.A.1.3.20 Amino acid transport ATP-binding protein OS=Streptococcus pyogenes serotype M1 GN=M5005_Spy0235 PE=4 SV=1	240	5.08301e-107	61	253	246	94.1	97.2	0	0	None	ABC	lysine
CAI98923.1	Q9CES4	3.A.1.3.25	gnl|BL_ORD_ID|15848 gnl|TC-DB|Q9CES4|3.A.1.3.25 Glutamine ABC transporter ATP-binding protein OS=Lactococcus lactis subsp. lactis (strain IL1403) GN=glnQ PE=3 SV=1	242	2.74037e-103	62	248	247	97.2	97.2	0	0	None	ABC	glutamate, Asparagine, Glutamine
CAI98099.1	Q9CES4	3.A.1.3.25	gnl|BL_ORD_ID|15848 gnl|TC-DB|Q9CES4|3.A.1.3.25 Glutamine ABC transporter ATP-binding protein OS=Lactococcus lactis subsp. lactis (strain IL1403) GN=glnQ PE=3 SV=1	246	7.05718e-96	60	246	247	99.6	98.8	0	0	None	ABC	glutamate, Asparagine, Glutamine
CAI97447.1	P26902	3.A.1.5.2	gnl|BL_ORD_ID|8325 gnl|TC-DB|P26902|3.A.1.5.2 Dipeptide transport protein DPPA - Bacillus subtilis.	262	2.92271e-20	28	257	274	99.6	94.2	1	0	None	ABC	Heme, Delta-aminolevulinic acid, dipeptides
CAI97124.1	Q2FZR4	3.A.1.5.19	gnl|BL_ORD_ID|11644 gnl|TC-DB|Q2FZR4|3.A.1.5.19 Oligopeptide ABC transporter, ATP-binding protein, putative - Staphylococcus aureus (strain NCTC 8325).	300	1.8661e-139	63	317	313	94	94.2	0	0	None	ABC	Oligopeptides
CAI97120.1	Q2FZR3	3.A.1.5.19	gnl|BL_ORD_ID|11643 gnl|TC-DB|Q2FZR3|3.A.1.5.19 Oligopeptide ABC transporter, substrate-binding protein, putative - Staphylococcus aureus (strain NCTC 8325).	495	5.9018e-106	38	530	551	91.7	88	0	1	None	ABC	Oligopeptides
CAI97123.1	Q9CIK9	3.A.1.5.25	gnl|BL_ORD_ID|15855 gnl|TC-DB|Q9CIK9|3.A.1.5.25 Oligopeptide ABC trasporter ATP binding protein OS=Lactococcus lactis subsp. lactis GN=optD PE=4 SV=1	342	3.03951e-171	68	347	349	97.4	97.7	0	0	None	ABC	Oligopeptides, peptides
CAI98182.1	F0TFS6	3.A.1.5.32	gnl|BL_ORD_ID|3691 gnl|TC-DB|F0TFS6|3.A.1.5.32 Oligopeptide ABC transporter substrate OS=Lactobacillus acidophilus (strain 30SC) GN=LAC30SC_07290 PE=4 SV=1	579	0	57	580	583	99.7	97.1	0	1	None	ABC	Alpha-galactosides
CAI98187.1	F0TFT0	3.A.1.5.32	gnl|BL_ORD_ID|3695 gnl|TC-DB|F0TFT0|3.A.1.5.32 Oligopeptide ABC transporter OS=Lactobacillus acidophilus (strain 30SC) GN=LAC30SC_07310 PE=4 SV=1	332	0	80	333	342	99.4	96.8	0	0	None	ABC	Alpha-galactosides
CAI98186.1	F0TFS9	3.A.1.5.32	gnl|BL_ORD_ID|3694 gnl|TC-DB|F0TFS9|3.A.1.5.32 Oligopeptide ABC transporter ATP-binding protein OS=Lactobacillus acidophilus (strain 30SC) GN=LAC30SC_07305 PE=3 SV=1	312	0	85	318	328	97.8	94.8	0	0	None	ABC	Alpha-galactosides
CAI97761.1	O51236	3.A.1.7.5	gnl|BL_ORD_ID|6281 gnl|TC-DB|O51236|3.A.1.7.5 Phosphate import ATP-binding protein PstB OS=Borrelia burgdorferi (strain ATCC 35210 / B31 / CIP 102532 / DSM 4680) GN=pstB PE=3 SV=1	247	2.20505e-118	65	252	260	97.6	94.6	0	0	None	ABC	phosphate
CAI97042.1	Q119I9	3.A.1.9.3	gnl|BL_ORD_ID|11047 gnl|TC-DB|Q119I9|3.A.1.9.3 Phosphonate ABC transporter, periplasmic phosphonate-binding protein OS=Trichodesmium erythraeum (strain IMS101) OX=203124 GN=Tery_0366 PE=1 SV=1	301	3.92913e-24	27	313	298	95.5	92.6	0	1	None	ABC	None
CAI97476.1	Q97Q42	3.A.1.11.7	gnl|BL_ORD_ID|15588 gnl|TC-DB|Q97Q42|3.A.1.11.7 Spermidine/putrescine import ATP-binding protein PotA OS=Streptococcus pneumoniae serotype 4 (strain ATCC BAA-334 / TIGR4) GN=potA PE=3 SV=1	357	2.56148e-156	62	380	385	93.4	92.5	0	0	None	ABC	Spermidine, Putrescine
CAI97983.1	Q93A35	3.A.1.12.8	gnl|BL_ORD_ID|15317 gnl|TC-DB|Q93A35|3.A.1.12.8 BilEA - Listeria monocytogenes.	265	2.39442e-72	47	307	328	85.3	79.9	0	0	None	ABC	Glycine betaine, Proline
CAI97170.1	Q99YA4	3.A.1.14.10	gnl|BL_ORD_ID|15689 gnl|TC-DB|Q99YA4|3.A.1.14.10 Putative ABC transporter - Streptococcus pyogenes serotype M1.	230	2.1219e-30	32	236	278	91.5	80.9	0	0	None	ABC	Heme
CAI98776.1	P0A9X1	3.A.1.15.5	gnl|BL_ORD_ID|7437 gnl|TC-DB|P0A9X1|3.A.1.15.5 Zinc import ATP-binding protein znuC - Escherichia coli.	210	8.21541e-33	31	217	251	96.3	81.3	0	0	None	ABC	Zn2+
CAI98904.1	O54370	3.A.1.20.1	gnl|BL_ORD_ID|6328 gnl|TC-DB|O54370|3.A.1.20.1 PUTATIVE ABC TRANSPORTER SHIC - Treponema hyodysenteriae (Serpulina hyodysenteriae).	310	1.19093e-88	45	344	374	87.8	82.1	0	0	None	ABC	Fe3+
CAI97775.1	Q97JB8	3.A.1.23.2	gnl|BL_ORD_ID|15574 gnl|TC-DB|Q97JB8|3.A.1.23.2 Cobalt transport (ATPase component) - Clostridium acetobutylicum.	248	9.00419e-37	32	255	279	95.3	88.5	0	0	None	ABC	Co2+
CAI97776.1	Q97JB8	3.A.1.23.2	gnl|BL_ORD_ID|15574 gnl|TC-DB|Q97JB8|3.A.1.23.2 Cobalt transport (ATPase component) - Clostridium acetobutylicum.	282	1.86164e-32	29	272	279	97.1	97.1	0	0	None	ABC	Co2+
CAI97620.1	Q8K8K8	3.A.1.24.3	gnl|BL_ORD_ID|14568 gnl|TC-DB|Q8K8K8|3.A.1.24.3 Methionine import ATP-binding protein metN OS=Streptococcus pyogenes serotype M3 GN=metN PE=3 SV=1	348	7.09621e-119	53	351	354	97.4	97.7	0	0	None	ABC	Methionine
CAI97619.1	Q8K8K9	3.A.1.24.3	gnl|BL_ORD_ID|14569 gnl|TC-DB|Q8K8K9|3.A.1.24.3 Putative lipoprotein (Putative uncharacterized protein SPs1626) OS=Streptococcus pyogenes serotype M3 GN=atmB PE=4 SV=1	253	5.14481e-73	47	273	281	88.6	89	0	1	None	ABC	Methionine
CAI96945.1	Q9HT68	3.A.1.24.5	gnl|BL_ORD_ID|16143 gnl|TC-DB|Q9HT68|3.A.1.24.5 Probable TonB-dependent receptor OS=Pseudomonas aeruginosa (strain ATCC 15692 / PAO1 / 1C / PRS 101 / LMG 12228) GN=PA5505 PE=4 SV=1	266	1.18089e-44	37	293	260	90.4	97.3	1	0	None	ABC	L-histidine
CAI97259.1	Q03PY5	3.A.1.26.9	gnl|BL_ORD_ID|10644 gnl|TC-DB|Q03PY5|3.A.1.26.9 Energy-coupling factor transporter ATP-binding protein EcfA1 OS=Lactobacillus brevis (strain ATCC 367 / JCM 1170) GN=ecfA1 PE=3 SV=1	277	1.05823e-109	54	282	279	97.9	97.8	0	0	None	ABC	folate
CAI97260.1	Q839D4	3.A.1.26.10	gnl|BL_ORD_ID|14009 gnl|TC-DB|Q839D4|3.A.1.26.10 Cobalt import ATP-binding protein CbiO 2 OS=Enterococcus faecalis GN=cbiO2 PE=3 SV=2	287	2.23604e-105	52	287	289	99	99	0	0	None	ABC	Folic acid
CAI98498.1	Q74I62	3.A.1.29.1	gnl|BL_ORD_ID|13589 gnl|TC-DB|Q74I62|3.A.1.29.1 Putative ABC transporter ATP-binding protein LJ_1704 OS=Lactobacillus johnsonii GN=LJ_1704 PE=3 SV=1	561	0	66	572	573	97.9	97.7	0	0	None	ABC	Methionine precursors
CAI96991.1	Q97RS3	3.A.1.30.2	gnl|BL_ORD_ID|15594 gnl|TC-DB|Q97RS3|3.A.1.30.2 ABC transporter, ATP-binding protein OS=Streptococcus pneumoniae serotype 4 (strain ATCC BAA-334 / TIGR4) GN=SP_0720 PE=3 SV=1	438	5.75861e-62	32	451	461	94.2	91.5	0	0	None	ABC	thiamin
CAI97462.1	Q99ZY3	3.A.1.34.1	gnl|BL_ORD_ID|15695 gnl|TC-DB|Q99ZY3|3.A.1.34.1 Putative ABC transporter (ATP-binding protein) OS=Streptococcus pyogenes serotype M1 GN=SPy_1019 PE=4 SV=1	249	1.01037e-81	51	254	252	97.6	98.4	0	1	None	ABC	tryptophan
CAI98807.1	Q7A3X3	3.A.1.122.4	gnl|BL_ORD_ID|13638 gnl|TC-DB|Q7A3X3|3.A.1.122.4 Putative hemin import ATP-binding protein hrtA OS=Staphylococcus aureus (strain N315) GN=hrtA PE=3 SV=1	222	1.01448e-54	44	228	221	95.6	98.6	0	1	None	ABC	Heme
CAI98597.1	Q8DQF8	3.A.1.122.20	gnl|BL_ORD_ID|14263 gnl|TC-DB|Q8DQF8|3.A.1.122.20 Uncharacterized protein OS=Streptococcus pneumoniae (strain ATCC BAA-255 / R6) GN=ABC-NBD PE=4 SV=1	222	7.68529e-54	40	226	233	96.5	93.1	0	0	None	ABC	None
CAI97292.1	Q48597	3.A.1.124.1	gnl|BL_ORD_ID|12130 gnl|TC-DB|Q48597|3.A.1.124.1 NisF - Lactococcus lactis.	180	1.18452e-34	35	200	225	87.5	79.1	0	0	None	ABC	Nisin
CAI97890.1	Q8Y5F0	3.A.1.134.12	gnl|BL_ORD_ID|15128 gnl|TC-DB|Q8Y5F0|3.A.1.134.12 Lmo2114 protein OS=Listeria monocytogenes serovar 1/2a (strain ATCC BAA-679 / EGD-e) GN=lmo2114 PE=4 SV=1	247	1.67342e-87	51	250	255	98.4	96.1	0	0	None	ABC	Beta-lactam antibiotics, Nisin, Gallidermin, Bacitracin
CAI97921.1	Q8Y5F0	3.A.1.134.12	gnl|BL_ORD_ID|15128 gnl|TC-DB|Q8Y5F0|3.A.1.134.12 Lmo2114 protein OS=Listeria monocytogenes serovar 1/2a (strain ATCC BAA-679 / EGD-e) GN=lmo2114 PE=4 SV=1	247	1.67342e-87	51	250	255	98.4	96.1	0	0	None	ABC	Beta-lactam antibiotics, Nisin, Gallidermin, Bacitracin
CAI96879.1	P77279	3.A.1.139.2	gnl|BL_ORD_ID|10103 gnl|TC-DB|P77279|3.A.1.139.2 Probable iron export ATP-binding protein FetA OS=Escherichia coli (strain K12) GN=fetA PE=1 SV=1	205	3.5682e-57	44	212	225	95.8	90.7	0	0	None	ABC	Fe2+
CAI98327.1	P55339	3.A.1.143.1	gnl|BL_ORD_ID|9633 gnl|TC-DB|P55339|3.A.1.143.1 ABC-type transporter ATP-binding protein EcsA OS=Bacillus subtilis (strain 168) GN=ecsA PE=1 SV=1	240	2.04573e-77	48	253	247	94.5	96.4	0	0	None	ABC	proteins
CAI98503.1	A0RI82	3.A.1.153.2	gnl|BL_ORD_ID|200 gnl|TC-DB|A0RI82|3.A.1.153.2 ABC transporter, ATP-binding protein OS=Bacillus thuringiensis (strain Al Hakam) GN=BALH_3695 PE=4 SV=1	290	9.22381e-50	31	301	298	95.7	96	0	0	None	ABC	None
CAI98409.1	ANC59923	3.A.1.211.25	gnl|BL_ORD_ID|1278 gnl|TC-DB|ANC59923.1|3.A.1.211.25 OptrA [Enterococcus faecalis]	627	1.35638e-124	33	638	639	96.9	96.7	0	0	None	ABC	None
CAI98768.1	ANC59923	3.A.1.211.25	gnl|BL_ORD_ID|1278 gnl|TC-DB|ANC59923.1|3.A.1.211.25 OptrA [Enterococcus faecalis]	497	4.40255e-80	32	514	639	93.2	77.2	0	0	None	ABC	None
CAI97536.1	P50000	3.A.2.1.5	gnl|BL_ORD_ID|9430 gnl|TC-DB|P50000|3.A.2.1.5 ATP synthase subunit alpha, sodium ion specific OS=Acetobacterium woodii (strain ATCC 29683 / DSM 1030 / JCM 2381 / KCTC 1655) GN=atpA PE=3 SV=3	504	0	61	503	502	99.4	99.6	0	0	None	F-ATPase	Na+
CAI97538.1	P50002	3.A.2.1.5	gnl|BL_ORD_ID|9431 gnl|TC-DB|P50002|3.A.2.1.5 ATP synthase subunit beta, sodium ion specific OS=Acetobacterium woodii (strain ATCC 29683 / DSM 1030 / JCM 2381 / KCTC 1655) GN=atpD PE=1 SV=3	461	0	69	479	466	96	98.3	0	0	None	F-ATPase	Na+
CAI97537.1	P50005	3.A.2.1.5	gnl|BL_ORD_ID|9432 gnl|TC-DB|P50005|3.A.2.1.5 ATP synthase gamma chain, sodium ion specific OS=Acetobacterium woodii (strain ATCC 29683 / DSM 1030 / JCM 2381 / KCTC 1655) GN=atpG PE=1 SV=3	334	5.87941e-47	29	320	302	99.4	99.3	0	0	None	F-ATPase	Na+
CAI97535.1	Q9RMB3	3.A.2.1.5	gnl|BL_ORD_ID|16758 gnl|TC-DB|Q9RMB3|3.A.2.1.5 ATP synthase subunit delta OS=Acetobacterium woodii GN=atpH PE=3 SV=1	168	1.44429e-21	29	180	180	92.2	92.2	0	0	None	F-ATPase	Na+
CAI97539.1	BAK19949	3.A.2.1.10	gnl|BL_ORD_ID|2059 gnl|TC-DB|BAK19949|3.A.2.1.10 ApH+ATPase epsilon subunit [Aphanothece halophytica]	129	1.4913e-14	29	146	138	87.7	89.9	1	0	None	F-ATPase	protons, H+
CAI97311.1	Q8ZUJ0	3.A.3.5.25	gnl|BL_ORD_ID|15199 gnl|TC-DB|Q8ZUJ0|3.A.3.5.25 Cation-transporting ATPase (P-type) OS=Pyrobaculum aerophilum GN=PAE2758 PE=4 SV=1	73	9.95221e-07	30	75	789	96	8.9	0	8	None	P-ATPase	Cu+
CAI98173.1	P0AGD7	3.A.5.1.1	gnl|BL_ORD_ID|7644 gnl|TC-DB|P0AGD7|3.A.5.1.1 Signal recognition particle protein - Escherichia coli.	447	1.42239e-139	47	476	453	93.3	98.5	0	0	None	Sec	proteins
CAI98179.1	P10121	3.A.5.1.1	gnl|BL_ORD_ID|7749 gnl|TC-DB|P10121|3.A.5.1.1 CELL DIVISION PROTEIN FTSY - Escherichia coli.	446	3.28705e-90	39	442	497	95.2	86.9	0	0	None	Sec	proteins
CAI97437.1	Q6MR29	3.A.5.1.3	gnl|BL_ORD_ID|13260 gnl|TC-DB|Q6MR29|3.A.5.1.3 Protein translocase subunit SecA OS=Bdellovibrio bacteriovorus (strain ATCC 15356 / DSM 50701 / NCIB 9529 / HD100) GN=secA PE=3 SV=1	832	0	48	800	889	99.1	91.1	1	0	None	Sec	proteins
CAI98074.1	Q07711	3.A.7.7.1	gnl|BL_ORD_ID|10782 gnl|TC-DB|Q07711|3.A.7.7.1 DNA topoisomerase I (EC 5.99.1.2) (Omega-protein) (Relaxing enzyme) (Untwisting enzyme) (Swivelase) - Staphylococcus aureus.	630	2.83337e-35	24	727	700	79.1	84.9	0	0	None	IVSP	DNA
CAI98792.1	Q5EP68	3.A.7.11.1	gnl|BL_ORD_ID|12663 gnl|TC-DB|Q5EP68|3.A.7.11.1 ParA - Neisseria gonorrhoeae.	238	1.94709e-12	28	259	295	88.8	80	0	1	None	IVSP	DNA
CAI97585.1	Q6MDD6	3.A.7.16.1	gnl|BL_ORD_ID|13186 gnl|TC-DB|Q6MDD6|3.A.7.16.1 Putative exodeoxyribonuclease V OS=Protochlamydia amoebophila (strain UWE25) GN=recD PE=4 SV=1	735	3.3109e-115	32	796	721	90.2	98.2	0	0	None	IVSP	DNA
CAI96854.1	Q5G3M3	3.A.7.19.1	gnl|BL_ORD_ID|12694 gnl|TC-DB|Q5G3M3|3.A.7.19.1 Single-stranded DNA-binding protein OS=Enterococcus faecalis GN=pcfS PE=3 SV=1	116	2.8719e-49	63	191	150	60.2	76.7	0	0	None	IVSP	DNA
CAI98115.1	P38523	3.A.8.1.1	gnl|BL_ORD_ID|8881 gnl|TC-DB|P38523|3.A.8.1.1 GrpE protein homolog, mitochondrial precursor - Saccharomyces cerevisiae (Baker's yeast).	185	5.50818e-23	30	184	228	97.3	78.1	0	0	None	MPT	proteins
CAI97218.1	Q9FI56	3.A.9.1.2	gnl|BL_ORD_ID|15971 gnl|TC-DB|Q9FI56|3.A.9.1.2 Chaperone protein ClpC1, chloroplastic OS=Arabidopsis thaliana GN=CLPC1 PE=1 SV=1	806	0	45	819	929	96.9	86.2	0	0	None	CEPT or Tic-Toc	proteins
CAI97404.1	Q9FI56	3.A.9.1.2	gnl|BL_ORD_ID|15971 gnl|TC-DB|Q9FI56|3.A.9.1.2 Chaperone protein ClpC1, chloroplastic OS=Arabidopsis thaliana GN=CLPC1 PE=1 SV=1	678	0	48	731	929	88.9	72.9	0	0	None	CEPT or Tic-Toc	proteins
CAI98840.1	Q9SXJ7	3.A.9.1.2	gnl|BL_ORD_ID|16898 gnl|TC-DB|Q9SXJ7|3.A.9.1.2 Chaperone protein ClpC2, chloroplastic OS=Arabidopsis thaliana GN=CLPC2 PE=2 SV=1	647	1.64679e-180	45	696	952	88.5	67.3	0	0	None	CEPT or Tic-Toc	proteins
CAI97433.1	Q8CWM9	3.A.11.1.2	gnl|BL_ORD_ID|14227 gnl|TC-DB|Q8CWM9|3.A.11.1.2 Involved in transformation; required for DNA uptake but not for binding; Related to ATP-dependent RNA/DNA helicases - Streptococcus pneumoniae (strain ATCC BAA-255 / R6).	425	7.64522e-92	41	425	432	97.4	97	0	0	None	DNA-T	ssDNA
CAI97177.1	G2JTB4	3.A.11.1.4	gnl|BL_ORD_ID|4202 gnl|TC-DB|G2JTB4|3.A.11.1.4 ComE operon protein 2 OS=Listeria monocytogenes J0161 GN=LMOG_00216 PE=3 SV=1	146	1.39705e-54	49	160	186	90.6	78	0	0	None	DNA-T	ssDNA
CAI98190.1	AKM80112	3.A.11.1.5	gnl|BL_ORD_ID|1201 gnl|TC-DB|AKM80112|3.A.11.1.5 putative ATP-dependent DNA helicase [Candidatus Saccharibacteria bacterium GW2011_GWC2_44_17]	678	1.72057e-138	37	679	676	97.8	98.5	1	0	None	DNA-T	None
CAI98075.1	AKM80915	3.A.11.1.5	gnl|BL_ORD_ID|1237 gnl|TC-DB|AKM80915.1|3.A.11.1.5 hypothetical protein UW38_C0001G1085 [Candidatus Saccharibacteria bacterium GW2011_GWC2_44_17]	181	2.75727e-41	45	279	285	64.2	63.2	0	0	None	DNA-T	None
CAI97372.1	P38919	3.A.18.1.1	gnl|BL_ORD_ID|8907 gnl|TC-DB|P38919|3.A.18.1.1 Eukaryotic initiation factor 4A-III - Homo sapiens (Human).	337	3.83909e-36	27	414	411	80	81.5	0	0	None	3.A.18	mRNA
CAI97464.1	B3ET62	3.A.23.6.1	gnl|BL_ORD_ID|1640 gnl|TC-DB|B3ET62|3.A.23.6.1 Glyceraldehyde-3-phosphate dehydrogenase OS=Amoebophilus asiaticus (strain 5a2) GN=Aasi_1069 PE=3 SV=1	323	2.35986e-95	50	338	331	94.1	94	0	0	None	T6SS	None
CAI98056.1	B3ERW3	3.A.23.6.1	gnl|BL_ORD_ID|1638 gnl|TC-DB|B3ERW3|3.A.23.6.1 Uncharacterized protein OS=Amoebophilus asiaticus (strain 5a2) GN=Aasi_0564 PE=4 SV=1	315	9.86042e-79	41	315	314	99.4	99.4	1	0	None	T6SS	None
CAI97726.1	Q9ZAA7	3.B.1.1.3	gnl|BL_ORD_ID|17407 gnl|TC-DB|Q9ZAA7|3.B.1.1.3 GLUTACONYL-COA DECARBOXYLASE GAMMA SUBUNIT (EC 4.1.1.70) - Acidaminococcus fermentans.	145	3.05627e-10	32	160	145	84.4	99.3	0	0	None	NaT-DC	Na+
CAI97039.1	C9MZ76	4.A.5.1.6	gnl|BL_ORD_ID|2521 gnl|TC-DB|C9MZ76|4.A.5.1.6 Phosphoenolpyruvate-dependent sugar phosphotransferase system, EIIA 2 OS=Leptotrichia hofstadii F0254 GN=GCWU000323_01873 PE=4 SV=1	133	2.05349e-18	33	159	151	82.4	84.1	0	0	None	Gat	Galactitol
CAI98747.1	P39851	8.A.3.2.1	gnl|BL_ORD_ID|8998 gnl|TC-DB|P39851|8.A.3.2.1 CAPB protein - Staphylococcus aureus.	213	3.64671e-56	41	257	228	82.5	91.7	0	0	None	MPA1-C or MPA1+C	NONE
CAI96936.1	P80874	8.A.5.1.4	gnl|BL_ORD_ID|10186 gnl|TC-DB|P80874|8.A.5.1.4 General stress protein 69 OS=Bacillus subtilis (strain 168) GN=yhdN PE=1 SV=2	332	7.56861e-26	27	285	331	97.9	97	0	0	None	KTN	NONE
CAI97407.1	P08839	8.A.7.1.1	gnl|BL_ORD_ID|7300 gnl|TC-DB|P08839|8.A.7.1.1 PHOSPHOENOLPYRUVATE-PROTEIN PHOSPHOTRANSFERASE (EC 2.7.3.9) (PHOSPHOTRANSFERASE SYSTEM, ENZYME I) - Escherichia coli.	560	0	49	575	575	96.9	97	0	0	None	EI	NONE
CAI97406.1	P0AA04	8.A.8.1.1	gnl|BL_ORD_ID|7439 gnl|TC-DB|P0AA04|8.A.8.1.1 Phosphocarrier protein HPr - Escherichia coli.	83	1.98592e-17	42	88	85	93.2	96.5	0	0	None	HPr	NONE
CAI98590.1	A3U437	9.B.29.2.12	gnl|BL_ORD_ID|442 gnl|TC-DB|A3U437|9.B.29.2.12 Suf C, ATPase OS=Pseudooceanicola batsensis (strain ATCC BAA-863 / DSM 15984 / KCTC 12145 / HTCC2597) OX=252305 GN=OB2597_03564 PE=4 SV=1	248	1.64188e-91	56	259	251	93.8	98.4	0	0	None	4-5PC	Unknown
CAI97211.1	WP_121250785	9.B.111.1.5	gnl|BL_ORD_ID|19005 gnl|TC-DB|WP_121250785|9.B.111.1.5 lysine--tRNA ligase [Solirubrobacter pauli]	465	1.98161e-134	47	501	909	92.6	48.8	0	2	None	LysS	None
CAI97558.1	Q01465	9.B.157.1.1	gnl|BL_ORD_ID|10509 gnl|TC-DB|Q01465|9.B.157.1.1 Rod shape-determining protein MreB OS=Bacillus subtilis (strain 168) GN=mreB PE=3 SV=3	339	1.05486e-153	63	334	337	99.7	99.7	0	1	None	MreBCD	Folic acid
CAI98211.1	TAG98396	9.B.321.1.2	gnl|BL_ORD_ID|17902 gnl|TC-DB|TAG98396|9.B.321.1.2 zinc-ribbon domain-containing protein [Oscillatoriales cyanobacterium]	244	3.98443e-17	30	251	324	94.4	74.4	0	0	None	SigT	None
CAI97334.1	Q83XH1	9.B.325.1.1	gnl|BL_ORD_ID|14016 gnl|TC-DB|Q83XH1|9.B.325.1.1 ABC transporter - Clostridium hathewayi.	528	0	57	540	546	97.6	95.8	0	0	None	ABC4	None
CAI97861.1	XP_001702091	9.B.354.2.4	gnl|BL_ORD_ID|19099 gnl|TC-DB|XP_001702091.1|9.B.354.2.4 predicted protein, partial [Chlamydomonas reinhardtii]	227	3.95474e-32	32	233	240	94.4	91.7	0	0	None	P24CP	None

## Sheet: Crispatus
Query ID	Hit ID	Hit TCID	Hit Description	Match Len	e-Val	% Identity	Query Length	Hit Length	Query Coverage	Hit Coverage	Query TMS#	Hit TMS#	TM-Overlap Score	Family Abrv.	Predicted Substrate
CBL49819.1	Q8Y5K1	1.A.1.17.2	gnl|BL_ORD_ID|15129 gnl|TC-DB|Q8Y5K1|1.A.1.17.2 Lmo2059 protein OS=Listeria monocytogenes GN=lmo2059 PE=4 SV=1	250	2.16515e-22	28	280	247	83.6	96.4	6	6	5.5	VIC	K+
CBL51009.1	D7VEY8	1.A.8.2.7	gnl|BL_ORD_ID|3106 gnl|TC-DB|D7VEY8|1.A.8.2.7 MIP family glycerol uptake facilitator protein GlpF OS=Lactobacillus plantarum subsp. plantarum ATCC 14917 GN=glpF4 PE=3 SV=1	250	2.38458e-124	64	250	250	99.6	99.6	6	6	5.6	MIP	water, Dihydroxyacetone, glycerol
CBL49981.1	A3CPR5	1.A.14.2.6	gnl|BL_ORD_ID|391 gnl|TC-DB|A3CPR5|1.A.14.2.6 Integral membrane protein, possible receptor, putative OS=Streptococcus sanguinis (strain SK36) GN=SSA_1788 PE=4 SV=1	221	2.28889e-39	36	236	227	91.9	96	8	7	6.15	CaTA	Unknown
CBL49867.1	P94585	1.A.22.1.3	gnl|BL_ORD_ID|10317 gnl|TC-DB|P94585|1.A.22.1.3 Large-conductance mechanosensitive channel - Bacillus subtilis.	125	7.95793e-40	53	124	130	95.2	95.4	2	2	1.9	MscL	ions, Osmolytes
CBL49873.1	O34897	1.A.23.3.1	gnl|BL_ORD_ID|6159 gnl|TC-DB|O34897|1.A.23.3.1 YKUT PROTEIN - Bacillus subtilis.	219	4.63409e-45	37	278	267	77.3	81.6	2	2	1.65	MscS	Osmolytes
CBL51114.1	A3CLT2	1.A.35.3.4	gnl|BL_ORD_ID|390 gnl|TC-DB|A3CLT2|1.A.35.3.4 Cation transporter CorA family, putative OS=Streptococcus sanguinis (strain SK36) GN=SSA_0701 PE=4 SV=1	292	6.11785e-41	28	305	302	93.4	93.7	2	3	1.5	MIT	Mg2+
CBL49491.1	A3CLT2	1.A.35.3.4	gnl|BL_ORD_ID|390 gnl|TC-DB|A3CLT2|1.A.35.3.4 Cation transporter CorA family, putative OS=Streptococcus sanguinis (strain SK36) GN=SSA_0701 PE=4 SV=1	299	3.09013e-14	22	289	302	95.8	96	3	3	0.65	MIT	Mg2+
CBL50513.1	O07591	1.A.43.1.2	gnl|BL_ORD_ID|5835 gnl|TC-DB|O07591|1.A.43.1.2 Protein CrcB homolog 2 OS=Bacillus subtilis (strain 168) GN=crcB2 PE=3 SV=1	126	6.63828e-14	33	132	131	90.9	93.1	4	4	3	Fluc	Camphor, Fl-
CBL50514.1	F6CB17	1.A.43.1.14	gnl|BL_ORD_ID|3899 gnl|TC-DB|F6CB17|1.A.43.1.14 Putative fluoride ion transporter CrcB OS=Lactobacillus kefiranofaciens (strain ZW3) GN=crcB PE=3 SV=1	124	7.27555e-72	77	125	124	98.4	99.2	3	4	3	Fluc	Fl-
CBL50385.1	K9UKU9	1.A.78.2.9	gnl|BL_ORD_ID|5129 gnl|TC-DB|K9UKU9|1.A.78.2.9 Putative integral membrane protein OS=Chamaesiphon minutus PCC 6605 GN=Cha6605_4324 PE=4 SV=1	190	2.70245e-12	33	227	197	81.1	92.4	6	5	3.9	KEL	None
CBL50059.1	P54428	1.A.112.2.2	gnl|BL_ORD_ID|9588 gnl|TC-DB|P54428|1.A.112.2.2 HYPOTHETICAL 49.0 KDA PROTEIN IN BLTD-TRKA INTERGENIC REGION - Bacillus subtilis.	417	4.96124e-74	33	452	434	90.9	94.2	4	4	3.4	CNNM	None
CBL51002.1	E3DLQ2	1.C.105.2.9	gnl|BL_ORD_ID|3309 gnl|TC-DB|E3DLQ2|1.C.105.2.9 Putative uncharacterized protein OS=Halanaerobium praevalens (strain ATCC 33744 / DSM 2228 / GSL) GN=Hprae_1098 PE=4 SV=1	906	3.98076e-28	23	831	872	98.2	96.3	2	2	0.85	Vip3	small molecules
CBL50494.1	P54176	1.C.113.1.1	gnl|BL_ORD_ID|9577 gnl|TC-DB|P54176|1.C.113.1.1 HEMOLYSIN III (HLY-III) - Bacillus cereus.	204	8.51947e-67	49	221	219	91.9	92.7	7	7	6.2	Hly III	small molecules
CBL49467.1	J8Z3M3	1.E.43.1.9	gnl|BL_ORD_ID|4942 gnl|TC-DB|J8Z3M3|1.E.43.1.9 Uncharacterized protein OS=Bacillus cereus HD73 PE=4 SV=1	77	2.88984e-25	53	85	82	89.4	92.7	3	3	2.6	T-A Hol	endolysin
CBL49988.1	J8Z3M3	1.E.43.1.9	gnl|BL_ORD_ID|4942 gnl|TC-DB|J8Z3M3|1.E.43.1.9 Uncharacterized protein OS=Bacillus cereus HD73 PE=4 SV=1	81	1.72361e-23	46	82	82	97.6	97.6	3	3	2.65	T-A Hol	endolysin
CBL50588.1	J8Z3M3	1.E.43.1.9	gnl|BL_ORD_ID|4942 gnl|TC-DB|J8Z3M3|1.E.43.1.9 Uncharacterized protein OS=Bacillus cereus HD73 PE=4 SV=1	75	8.98947e-20	44	86	82	86	90.2	3	3	2.55	T-A Hol	endolysin
CBL51460.1	Q46909	2.A.1.1.95	gnl|BL_ORD_ID|12074 gnl|TC-DB|Q46909|2.A.1.1.95 Inner membrane metabolite transport protein ygcS OS=Escherichia coli (strain K12) GN=ygcS PE=1 SV=2	422	2.52118e-65	31	454	445	92.5	92.6	12	12	9.85	MFS	Metabolites
CBL50013.1	P25744	2.A.1.2.20	gnl|BL_ORD_ID|8291 gnl|TC-DB|P25744|2.A.1.2.20 Hypothetical transport protein yceE - Escherichia coli.	388	4.36134e-133	51	399	408	96.7	94.6	12	12	10.55	MFS	fosfomycin, Fluoroquinolones
CBL51332.1	P25744	2.A.1.2.20	gnl|BL_ORD_ID|8291 gnl|TC-DB|P25744|2.A.1.2.20 Hypothetical transport protein yceE - Escherichia coli.	406	7.88688e-109	39	415	408	97.6	96.3	12	12	8.65	MFS	fosfomycin, Fluoroquinolones
CBL49606.1	O34546	2.A.1.2.69	gnl|BL_ORD_ID|6138 gnl|TC-DB|O34546|2.A.1.2.69 Uncharacterized MFS-type transporter yttB OS=Bacillus subtilis (strain 168) GN=yttB PE=3 SV=1	396	5.19079e-70	32	405	397	94.6	94.7	12	12	10.05	MFS	Unknown
CBL50203.1	O35018	2.A.1.3.30	gnl|BL_ORD_ID|6173 gnl|TC-DB|O35018|2.A.1.3.30 Lincomycin resistance protein lmrB - Bacillus subtilis.	361	7.43188e-68	34	398	479	89.7	75.2	11	14	10.5	MFS	None
CBL51093.1	O32182	2.A.1.3.33	gnl|BL_ORD_ID|6098 gnl|TC-DB|O32182|2.A.1.3.33 Uncharacterized MFS-type transporter yusP OS=Bacillus subtilis GN=yusP PE=3 SV=1	513	2.24191e-84	31	486	541	99	94.3	14	14	11.45	MFS	Novobiocin, Streptomycin, Actinomycin D
CBL50012.1	O32182	2.A.1.3.33	gnl|BL_ORD_ID|6098 gnl|TC-DB|O32182|2.A.1.3.33 Uncharacterized MFS-type transporter yusP OS=Bacillus subtilis GN=yusP PE=3 SV=1	410	4.79355e-57	30	489	541	82.8	75	14	14	10.5	MFS	Novobiocin, Streptomycin, Actinomycin D
CBL50003.1	P96712	2.A.1.3.50	gnl|BL_ORD_ID|10349 gnl|TC-DB|P96712|2.A.1.3.50 Multidrug resistance protein 3 OS=Bacillus subtilis (strain 168) GN=bmr3 PE=1 SV=1	479	2.95529e-64	31	488	512	95.1	93.2	14	14	11.3	MFS	drugs
CBL50148.1	I7QYF9	2.A.1.3.75	gnl|BL_ORD_ID|4875 gnl|TC-DB|I7QYF9|2.A.1.3.75 Major facilitator superfamily protein OS=Streptococcus canis FSL Z3-227 GN=SCAZ3_10115 PE=3 SV=1	488	2.76676e-157	48	490	499	97.1	97.6	14	14	9.15	MFS	None
CBL50845.1	C2UR80	2.A.1.46.5	gnl|BL_ORD_ID|2190 gnl|TC-DB|C2UR80|2.A.1.46.5 Quinolone resistence protein, major facilitator family transporter OS=Bacillus cereus Rock3-28 GN=bcere0019_7170 PE=4 SV=1	379	1.1609e-36	25	390	407	96.2	92.1	12	12	10.55	MFS	Quinolone
CBL49563.1	A8YZ14	2.A.1.62.1	gnl|BL_ORD_ID|961 gnl|TC-DB|A8YZ14|2.A.1.62.1 Possible MFS family major facilitator transporter OS=Staphylococcus aureus (strain USA300 / TCH1516) GN=USA300HOU_0099 PE=4 SV=1	381	5.46934e-14	20	411	406	90.5	88.7	12	12	10.55	MFS	Unknown
CBL51030.1	Q04DP6	2.A.1.68.1	gnl|BL_ORD_ID|10684 gnl|TC-DB|Q04DP6|2.A.1.68.1 Permease of the major facilitator superfamily OS=Oenococcus oeni (strain BAA-331 / PSU-1) GN=OEOE_1574 PE=4 SV=1	397	1.52061e-58	30	406	403	96.3	97.8	12	12	12.25	MFS	glucose
CBL51053.1	Q04DP6	2.A.1.68.1	gnl|BL_ORD_ID|10684 gnl|TC-DB|Q04DP6|2.A.1.68.1 Permease of the major facilitator superfamily OS=Oenococcus oeni (strain BAA-331 / PSU-1) GN=OEOE_1574 PE=4 SV=1	383	1.00176e-50	27	398	403	95	94.8	12	12	11.45	MFS	glucose
CBL50861.1	P43466	2.A.2.2.2	gnl|BL_ORD_ID|9196 gnl|TC-DB|P43466|2.A.2.2.2 RAFFINOSE CARRIER PROTEIN (RAFFINOSE PERMEASE) - Pediococcus pentosaceus.	624	1.25635e-139	36	639	641	96.7	96.9	13	13	11.45	GPH	Raffinose
CBL49484.1	Q9A612	2.A.2.6.2	gnl|BL_ORD_ID|15712 gnl|TC-DB|Q9A612|2.A.2.6.2 Transporter, putative OS=Caulobacter crescentus GN=CC_2283 PE=4 SV=1	502	8.20739e-58	29	444	541	96.6	90.6	12	14	8.25	GPH	Maltose, Maltooligosaccharides
CBL51398.1	P27837	2.A.3.1.15	gnl|BL_ORD_ID|8347 gnl|TC-DB|P27837|2.A.3.1.15 Probable transport protein YifK OS=Escherichia coli (strain K12) GN=yifK PE=1 SV=4	451	5.90259e-169	52	457	461	98.5	96.7	12	12	11.25	APC	Unknown
CBL50400.1	P27837	2.A.3.1.15	gnl|BL_ORD_ID|8347 gnl|TC-DB|P27837|2.A.3.1.15 Probable transport protein YifK OS=Escherichia coli (strain K12) GN=yifK PE=1 SV=4	446	2.96758e-168	53	463	461	96.1	95.7	12	12	10.6	APC	Unknown
CBL51399.1	P96704	2.A.3.1.16	gnl|BL_ORD_ID|10347 gnl|TC-DB|P96704|2.A.3.1.16 Uncharacterized transporter YdgF OS=Bacillus subtilis (strain 168) GN=ydgF PE=3 SV=1	441	5.58495e-174	52	449	458	97.6	95.9	12	12	10.2	APC	Unknown
CBL49910.1	P96704	2.A.3.1.16	gnl|BL_ORD_ID|10347 gnl|TC-DB|P96704|2.A.3.1.16 Uncharacterized transporter YdgF OS=Bacillus subtilis (strain 168) GN=ydgF PE=3 SV=1	439	3.30189e-142	44	457	458	95.6	95.2	12	12	10.05	APC	Unknown
CBL50441.1	Q8R706	2.A.3.3.22	gnl|BL_ORD_ID|14809 gnl|TC-DB|Q8R706|2.A.3.3.22 Amino acid transporters OS=Caldanaerobacter subterraneus subsp. tengcongensis (strain DSM 15242 / JCM 11007 / NBRC 100824 / MB4) GN=PotE6 PE=4 SV=1	460	1.17416e-134	43	461	475	98.3	96.6	13	13	8.35	APC	Amino acids
CBL50751.1	s6ex81	2.A.3.3.23	gnl|BL_ORD_ID|17737 gnl|TC-DB|s6ex81|2.A.3.3.23 Branched-chain amino acid permease OS=Lactococcus lactis subsp. lactis A12 GN=bcaP PE=4 SV=1	460	0	63	476	469	96.4	97.4	14	12	10.15	APC	Leucine, Isoleucine, Valine
CBL49502.1	O30417	2.A.3.7.1	gnl|BL_ORD_ID|6025 gnl|TC-DB|O30417|2.A.3.7.1 AMINO ACID ANTIPORTER GADC (ORFX) - Lactococcus lactis (subsp. lactis) (Streptococcus lactis).	463	3.8802e-108	35	480	503	96	91.7	12	12	11.7	APC	Gamma-aminobutyrate, glutamate
CBL50151.1	P75835	2.A.3.7.2	gnl|BL_ORD_ID|10025 gnl|TC-DB|P75835|2.A.3.7.2 Inner membrane transporter ycaM OS=Escherichia coli (strain K12) GN=ycaM PE=1 SV=2	475	2.11465e-142	45	477	476	97.7	98.3	12	12	10.9	APC	glutamate, Gamma-aminobutyric acid
CBL50180.1	P75835	2.A.3.7.2	gnl|BL_ORD_ID|10025 gnl|TC-DB|P75835|2.A.3.7.2 Inner membrane transporter ycaM OS=Escherichia coli (strain K12) GN=ycaM PE=1 SV=2	466	7.6496e-115	37	541	476	85.8	97.5	14	12	10.4	APC	glutamate, Gamma-aminobutyric acid
CBL50838.1	P39282	2.A.3.7.5	gnl|BL_ORD_ID|8937 gnl|TC-DB|P39282|2.A.3.7.5 Inner membrane transporter yjeM OS=Escherichia coli (strain K12) GN=yjeM PE=1 SV=2	490	9.19086e-145	43	498	500	97.8	97.2	12	12	10.65	APC	Unknown
CBL50519.1	F2HJG8	2.A.3.7.6	gnl|BL_ORD_ID|3746 gnl|TC-DB|F2HJG8|2.A.3.7.6 YlcA protein OS=Lactococcus lactis subsp. lactis (strain CV56) GN=ylcA PE=4 SV=1	471	1.08807e-115	38	490	488	95.1	95.9	12	12	9.6	APC	aspartate, glutamate
CBL50021.1	O34739	2.A.3.8.12	gnl|BL_ORD_ID|6148 gnl|TC-DB|O34739|2.A.3.8.12 YkbA protein - Bacillus subtilis.	435	7.9366e-149	49	439	438	97.9	97.9	12	12	10.85	APC	Serine, Threonine, tyrosine, tryptophan, phenylalanine, Histidine
CBL50022.1	O34739	2.A.3.8.12	gnl|BL_ORD_ID|6148 gnl|TC-DB|O34739|2.A.3.8.12 YkbA protein - Bacillus subtilis.	435	2.4414e-133	47	443	438	97.1	97.9	12	12	11.2	APC	Serine, Threonine, tyrosine, tryptophan, phenylalanine, Histidine
CBL50066.1	O34739	2.A.3.8.12	gnl|BL_ORD_ID|6148 gnl|TC-DB|O34739|2.A.3.8.12 YkbA protein - Bacillus subtilis.	442	2.65064e-105	39	433	438	99.3	97.5	12	12	10.75	APC	Serine, Threonine, tyrosine, tryptophan, phenylalanine, Histidine
CBL49712.1	O07002	2.A.3.11.1	gnl|BL_ORD_ID|5816 gnl|TC-DB|O07002|2.A.3.11.1 Hypothetical protein yvea - Bacillus subtilis.	514	7.53413e-105	35	530	520	95.8	96.5	14	14	9.6	APC	aspartate, glutamate, L-aspartate hydroxamate
CBL49785.1	O07084	2.A.4.1.3	gnl|BL_ORD_ID|5820 gnl|TC-DB|O07084|2.A.4.1.3 Cation transport protein YRDO - Bacillus subtilis.	294	7.96769e-61	36	299	311	96.7	93.9	5	5	4.7	CDF	Cd2+, Zn2+, H+, K+
CBL50078.1	Q6MMK1	2.A.6.6.11	gnl|BL_ORD_ID|13241 gnl|TC-DB|Q6MMK1|2.A.6.6.11 3-hydroxy-3-methylglutaryl coenzyme A reductase OS=Bdellovibrio bacteriovorus (strain ATCC 15356 / DSM 50701 / NCIB 9529 / HD100) GN=Bd1627 PE=3 SV=1	418	6.72583e-71	36	403	438	98.5	94.1	1	1	0	RND	Electrons
CBL51369.1	KRN20350	2.A.7.3.79	gnl|BL_ORD_ID|5289 gnl|TC-DB|KRN20350.1|2.A.7.3.79 DMT family permease [Lactobacillus similis DSM 23365 = JCM 2765]	300	1.40894e-78	45	306	313	95.8	94.2	10	10	8.95	DMT	None
CBL51368.1	KRN20350	2.A.7.3.79	gnl|BL_ORD_ID|5289 gnl|TC-DB|KRN20350.1|2.A.7.3.79 DMT family permease [Lactobacillus similis DSM 23365 = JCM 2765]	295	3.69371e-71	39	309	313	94.5	93.3	10	10	9.05	DMT	None
CBL50814.1	L8DP77	2.A.7.5.5	gnl|BL_ORD_ID|5410 gnl|TC-DB|L8DP77|2.A.7.5.5 Glucose transporter GlcU OS=Listeria monocytogenes GN=BN418_0174 PE=4 SV=1	286	5.74758e-60	36	287	285	99.3	98.6	10	10	8.5	DMT	glucose
CBL51469.1	Q01625	2.A.9.3.2	gnl|BL_ORD_ID|10517 gnl|TC-DB|Q01625|2.A.9.3.2 Stage III sporulation protein J precursor - Bacillus subtilis.	271	9.71062e-68	38	291	261	92.8	99.6	6	6	4	YidC/Alb3/Oxa1	proteins
CBL50815.1	P71067	2.A.14.1.3	gnl|BL_ORD_ID|9917 gnl|TC-DB|P71067|2.A.14.1.3 L-lactate permease OS=Bacillus subtilis (strain 168) GN=lutP PE=1 SV=2	539	5.97509e-95	35	508	563	97.6	95.2	16	16	10.75	LctP	L-lactate
CBL51328.1	Q5M4H8	2.A.17.1.6	gnl|BL_ORD_ID|12763 gnl|TC-DB|Q5M4H8|2.A.17.1.6 Di-or tripeptide:H+ symporter OS=Streptococcus thermophilus (strain ATCC BAA-250 / LMG 18311) GN=dtpT PE=3 SV=1	446	7.00893e-170	57	445	483	99.1	88.8	13	14	8.75	POT/PTR	dipeptides, tripeptides
CBL50388.1	F2HK99	2.A.26.1.9	gnl|BL_ORD_ID|3747 gnl|TC-DB|F2HK99|2.A.26.1.9 BrnQ protein OS=Lactococcus lactis subsp. lactis (strain CV56) GN=brnQ PE=4 SV=1	450	2.00088e-127	42	458	456	96.9	98.5	12	12	10.6	LIVCS	Branched amino acids
CBL49998.1	Q838N7	2.A.35.1.3	gnl|BL_ORD_ID|14005 gnl|TC-DB|Q838N7|2.A.35.1.3 Na+/H+ antiporter - Enterococcus faecalis (Streptococcus faecalis).	452	0	56	457	467	98.5	96.6	14	13	11.75	NhaC	tyrosine
CBL51420.1	P26235	2.A.37.2.1	gnl|BL_ORD_ID|8304 gnl|TC-DB|P26235|2.A.37.2.1 NA(+)/H(+) ANTIPORTER - Enterococcus hirae.	383	1.36539e-120	50	389	383	97.7	98.7	12	13	10	CPA2	Na+, H+
CBL50010.1	Q9CF78	2.A.40.1.2	gnl|BL_ORD_ID|15850 gnl|TC-DB|Q9CF78|2.A.40.1.2 Uracil permease - Lactococcus lactis (subsp. lactis) (Streptococcus lactis).	421	1.79861e-176	59	443	430	92.3	97.7	12	13	8.4	NAT/NCS2	Uracil
CBL49684.1	P42086	2.A.40.3.1	gnl|BL_ORD_ID|9118 gnl|TC-DB|P42086|2.A.40.3.1 XANTHINE PERMEASE - Bacillus subtilis.	419	6.58916e-160	54	428	438	97.7	95.2	13	13	10.85	NAT/NCS2	Xanthine
CBL51444.1	O34987	2.A.40.7.2	gnl|BL_ORD_ID|6167 gnl|TC-DB|O34987|2.A.40.7.2 Hypoxanthine/guanine permease (Hypothetical protein) - Bacillus subtilis.	436	4.06396e-166	53	436	440	97.7	98.9	12	12	7.8	NAT/NCS2	Hypoxanthine, Guanosine
CBL51441.1	O34987	2.A.40.7.2	gnl|BL_ORD_ID|6167 gnl|TC-DB|O34987|2.A.40.7.2 Hypoxanthine/guanine permease (Hypothetical protein) - Bacillus subtilis.	435	1.82321e-164	54	435	440	97.7	98.6	13	12	7.6	NAT/NCS2	Hypoxanthine, Guanosine
CBL51452.1	O34987	2.A.40.7.2	gnl|BL_ORD_ID|6167 gnl|TC-DB|O34987|2.A.40.7.2 Hypoxanthine/guanine permease (Hypothetical protein) - Bacillus subtilis.	438	1.54259e-158	52	436	440	98.2	99.1	12	12	7.15	NAT/NCS2	Hypoxanthine, Guanosine
CBL49534.1	K4IPL7	2.A.45.2.6	gnl|BL_ORD_ID|5054 gnl|TC-DB|K4IPL7|2.A.45.2.6 Transporter, probably The plasma membrane silicon (Silicate) efflux pump, Low Silicon 2, Lsi2 OS=Bifidobacterium asteroides (strain PRL2011) GN=BAST_1180 PE=4 SV=1	390	1.41571e-42	28	368	393	97.8	97.7	10	12	6.7	ArsB	Silicon
CBL51413.1	P39580	2.A.50.2.1	gnl|BL_ORD_ID|8965 gnl|TC-DB|P39580|2.A.50.2.1 Protein dltB - Bacillus subtilis.	402	9.10095e-120	47	412	395	95.6	98	10	12	6.7	GUP	Alanine
CBL50362.1	Q2G140	2.A.66.1.13	gnl|BL_ORD_ID|11648 gnl|TC-DB|Q2G140|2.A.66.1.13 Multidrug export protein mepA - Staphylococcus aureus (strain NCTC 8325).	427	3.53683e-70	30	449	451	94.9	94	12	12	10.75	MOP	Fluoroquinolones, Tigecycline
CBL50986.1	Q9KAX3	2.A.66.1.32	gnl|BL_ORD_ID|16281 gnl|TC-DB|Q9KAX3|2.A.66.1.32 BH2163 protein OS=Bacillus halodurans (strain ATCC BAA-125 / DSM 18197 / FERM 7344 / JCM 9153 / C-125) GN=BH2163 PE=4 SV=1	424	2.47348e-63	29	444	464	93.9	90.1	12	12	12.05	MOP	drugs, H+
CBL51198.1	Q8KUK6	2.A.66.2.16	gnl|BL_ORD_ID|14593 gnl|TC-DB|Q8KUK6|2.A.66.2.16 CpsU OS=Streptococcus thermophilus GN=cpsU PE=4 SV=1	471	2.2704e-168	49	475	471	98.9	99.8	14	14	11.55	MOP	Capsular polysaccharides
CBL49970.1	Q8KUK6	2.A.66.2.16	gnl|BL_ORD_ID|14593 gnl|TC-DB|Q8KUK6|2.A.66.2.16 CpsU OS=Streptococcus thermophilus GN=cpsU PE=4 SV=1	479	3.42412e-78	32	476	471	97.5	98.5	14	14	11.5	MOP	Capsular polysaccharides
CBL49608.1	Q9CHU5	2.A.72.1.3	gnl|BL_ORD_ID|15851 gnl|TC-DB|Q9CHU5|2.A.72.1.3 Probable potassium transport system protein kup 1 OS=Lactococcus lactis subsp. lactis (strain IL1403) GN=kup1 PE=3 SV=1	651	0	52	673	670	96.4	96.1	11	11	9.2	KUP	K+
CBL50044.1	Q9CHU5	2.A.72.1.3	gnl|BL_ORD_ID|15851 gnl|TC-DB|Q9CHU5|2.A.72.1.3 Probable potassium transport system protein kup 1 OS=Lactococcus lactis subsp. lactis (strain IL1403) GN=kup1 PE=3 SV=1	647	0	53	669	670	96.4	95.7	13	11	9.8	KUP	K+
CBL49627.1	O05469	2.A.77.1.1	gnl|BL_ORD_ID|5779 gnl|TC-DB|O05469|2.A.77.1.1 CADD PROTEIN - Staphylococcus aureus.	206	8.15145e-56	44	206	209	99	97.1	6	6	5.8	CadD	Cd2+
CBL51229.1	Q73PT4	2.A.79.1.5	gnl|BL_ORD_ID|13535 gnl|TC-DB|Q73PT4|2.A.79.1.5 Membrane protein, putative OS=Treponema denticola (strain ATCC 35405 / CIP 103919 / DSM 14222) GN=TDE_0712 PE=4 SV=1	240	2.72942e-38	34	256	260	93	91.2	5	5	3.55	ThrE	Glycine, Alanine
CBL51228.1	W4C0M8	2.A.79.1.7	gnl|BL_ORD_ID|18155 gnl|TC-DB|W4C0M8|2.A.79.1.7 Uncharacterized protein OS=Paenibacillus sp. FSL H8-237 GN=C171_23415 PE=4 SV=1	136	6.64218e-25	35	161	142	83.9	94.4	4	5	3.35	ThrE	Unknown
CBL50112.1	O32095	2.A.86.1.8	gnl|BL_ORD_ID|6089 gnl|TC-DB|O32095|2.A.86.1.8 UPF0118 membrane protein yueF OS=Bacillus subtilis GN=yueF PE=3 SV=1	357	5.16912e-66	32	395	369	89.9	95.9	8	8	8.5	2.A.86	Unknown
CBL51429.1	Q03YI6	2.A.87.2.1	gnl|BL_ORD_ID|10653 gnl|TC-DB|Q03YI6|2.A.87.2.1 Pantothenate transporter PanT OS=Leuconostoc mesenteroides subsp. mesenteroides (strain ATCC 8293 / NCDO 523) GN=panT PE=1 SV=1	208	2.90745e-22	33	201	204	99.5	97.5	5	6	5.3	2.A.87	Pantothenate
CBL50354.1	P62723	2.A.98.1.3	gnl|BL_ORD_ID|9789 gnl|TC-DB|P62723|2.A.98.1.3 Hypothetical UPF0324 membrane protein yeiH - Escherichia coli.	345	6.3527e-41	31	343	349	96.8	95.7	11	10	6.9	PSE	Unknown
CBL49783.1	Q8EDB6	2.A.102.3.4	gnl|BL_ORD_ID|14303 gnl|TC-DB|Q8EDB6|2.A.102.3.4 Probable membrane transporter protein OS=Shewanella oneidensis (strain MR-1) OX=211586 GN=yfcA PE=3 SV=2	231	5.00155e-15	25	252	269	90.5	85.1	8	9	6.65	TSUP	None
CBL50224.1	P0ABG7	2.A.103.1.2	gnl|BL_ORD_ID|7499 gnl|TC-DB|P0ABG7|2.A.103.1.2 Rod shape-determining protein rodA - Escherichia coli.	387	7.73356e-47	32	397	370	96	96.8	10	9	4.75	MPE	Lipid II
CBL50300.1	P07373	2.A.103.1.3	gnl|BL_ORD_ID|7247 gnl|TC-DB|P07373|2.A.103.1.3 STAGE V SPORULATION PROTEIN E - Bacillus subtilis.	371	6.4998e-58	33	394	366	92.1	94	10	10	6	MPE	Lipid II
CBL49548.1	B5UIP4	2.A.109.1.3	gnl|BL_ORD_ID|1770 gnl|TC-DB|B5UIP4|2.A.109.1.3 Putative tellurium resistance protein OS=Bacillus cereus AH1134 GN=BCAH1134_0458 PE=4 SV=1	252	1.41419e-65	45	262	263	95.4	90.9	7	7	4.9	TerC	Unknown
CBL50676.1	P39803	2.A.115.1.1	gnl|BL_ORD_ID|8990 gnl|TC-DB|P39803|2.A.115.1.1 UPF0750 membrane protein yitT OS=Bacillus subtilis (strain 168) GN=yitT PE=3 SV=2	273	3.9596e-69	39	292	280	93.2	96.8	5	5	4.6	NbcE	Novobiocin
CBL50492.1	P94357	2.A.115.1.2	gnl|BL_ORD_ID|10298 gnl|TC-DB|P94357|2.A.115.1.2 UPF0750 membrane protein YxkD OS=Bacillus subtilis (strain 168) GN=yxkD PE=3 SV=1	279	3.20847e-53	31	294	278	93.9	97.5	5	5	4.2	NbcE	Unknown
CBL50795.1	P94357	2.A.115.1.2	gnl|BL_ORD_ID|10298 gnl|TC-DB|P94357|2.A.115.1.2 UPF0750 membrane protein YxkD OS=Bacillus subtilis (strain 168) GN=yxkD PE=3 SV=1	262	6.7825e-28	24	278	278	93.5	93.9	7	5	4.1	NbcE	Unknown
CBL51118.1	P29823	3.A.1.1.4	gnl|BL_ORD_ID|8392 gnl|TC-DB|P29823|3.A.1.1.4 Lactose transport system permease protein lacF - Agrobacterium radiobacter.	273	6.87077e-49	32	288	298	93.4	91.3	6	6	6.35	ABC	Lactose
CBL49945.1	Q7WWR0	3.A.1.1.20	gnl|BL_ORD_ID|13898 gnl|TC-DB|Q7WWR0|3.A.1.1.20 Substrate-binding protein MsmE - Lactobacillus acidophilus.	434	0	85	432	431	99.8	99.8	1	1	0.9	ABC	Fructooligosaccharides
CBL49946.1	Q7WWQ9	3.A.1.1.20	gnl|BL_ORD_ID|13897 gnl|TC-DB|Q7WWQ9|3.A.1.1.20 Transmembrane permease MsmF - Lactobacillus acidophilus.	294	0	99	294	294	99.7	99.7	6	6	6.6	ABC	Fructooligosaccharides
CBL49947.1	Q7WWQ8	3.A.1.1.20	gnl|BL_ORD_ID|13896 gnl|TC-DB|Q7WWQ8|3.A.1.1.20 Transmembrane permease MsmG - Lactobacillus acidophilus.	285	0	94	285	285	99.6	99.6	6	6	6.25	ABC	Fructooligosaccharides
CBL51338.1	Q8DT27	3.A.1.1.27	gnl|BL_ORD_ID|14278 gnl|TC-DB|Q8DT27|3.A.1.1.27 Putative maltose/maltodextrin ABC transporter, permease protein MalF - Streptococcus mutans.	442	4.30774e-163	55	452	453	96.5	96.2	8	8	8.85	ABC	Maltose, Maltotriose, Maltotetraose, Trehalose
CBL51337.1	Q8DT26	3.A.1.1.27	gnl|BL_ORD_ID|14277 gnl|TC-DB|Q8DT26|3.A.1.1.27 Putative maltose/maltodextrin ABC transporter, MalG permease - Streptococcus mutans.	279	2.34713e-104	55	285	278	97.2	98.6	6	6	6.05	ABC	Maltose, Maltotriose, Maltotetraose, Trehalose
CBL51339.1	Q8DT28	3.A.1.1.27	gnl|BL_ORD_ID|14279 gnl|TC-DB|Q8DT28|3.A.1.1.27 Putative maltose/maltodextrin ABC transporter, sugar-binding protein MalX - Streptococcus mutans.	419	8.40794e-97	40	408	415	99	98.8	1	1	0.85	ABC	Maltose, Maltotriose, Maltotetraose, Trehalose
CBL50890.1	Q8DT28	3.A.1.1.27	gnl|BL_ORD_ID|14279 gnl|TC-DB|Q8DT28|3.A.1.1.27 Putative maltose/maltodextrin ABC transporter, sugar-binding protein MalX - Streptococcus mutans.	417	1.08311e-93	40	405	415	99.3	99	1	1	0.9	ABC	Maltose, Maltotriose, Maltotetraose, Trehalose
CBL50854.1	Q00749	3.A.1.1.28	gnl|BL_ORD_ID|10483 gnl|TC-DB|Q00749|3.A.1.1.28 Multiple sugar-binding protein precursor - Streptococcus mutans.	417	0	62	418	420	98.8	98.8	1	1	0.85	ABC	Raffinose, Stachyose
CBL50852.1	Q00751	3.A.1.1.28	gnl|BL_ORD_ID|10485 gnl|TC-DB|Q00751|3.A.1.1.28 Multiple sugar-binding transport system permease protein msmG - Streptococcus mutans.	277	3.10213e-168	82	277	277	99.6	99.6	6	6	6.3	ABC	Raffinose, Stachyose
CBL50853.1	Q00750	3.A.1.1.28	gnl|BL_ORD_ID|10484 gnl|TC-DB|Q00750|3.A.1.1.28 Multiple sugar-binding transport system permease protein msmF - Streptococcus mutans.	290	1.00794e-166	75	291	290	99.3	99.7	6	6	6.4	ABC	Raffinose, Stachyose
CBL51434.1	Q8DU39	3.A.1.2.12	gnl|BL_ORD_ID|14283 gnl|TC-DB|Q8DU39|3.A.1.2.12 Putative ABC sugar transporter, permease protein - Streptococcus mutans.	318	5.60548e-159	65	318	318	99.7	99.7	10	9	7.9	ABC	Deoxyribonucleosides
CBL51433.1	Q8DU38	3.A.1.2.12	gnl|BL_ORD_ID|14282 gnl|TC-DB|Q8DU38|3.A.1.2.12 Putative sugar ABC transporter, permease protein - Streptococcus mutans.	352	2.85878e-122	49	382	358	90.8	98	7	8	7.15	ABC	Deoxyribonucleosides
CBL51430.1	D2BKA1	3.A.1.2.17	gnl|BL_ORD_ID|2715 gnl|TC-DB|D2BKA1|3.A.1.2.17 Basic membrane lipoprotein OS=Lactococcus lactis subsp. lactis (strain KF147) GN=bmpA PE=4 SV=1	352	9.07737e-112	47	364	350	96.4	98.3	1	1	0.85	ABC	Nucleosides
CBL51431.1	D2BKA1	3.A.1.2.17	gnl|BL_ORD_ID|2715 gnl|TC-DB|D2BKA1|3.A.1.2.17 Basic membrane lipoprotein OS=Lactococcus lactis subsp. lactis (strain KF147) GN=bmpA PE=4 SV=1	359	7.55078e-110	48	361	350	99.2	99.7	1	1	0.85	ABC	Nucleosides
CBL50937.1	P0AEQ6	3.A.1.3.2	gnl|BL_ORD_ID|7574 gnl|TC-DB|P0AEQ6|3.A.1.3.2 Glutamine transport system permease protein glnP - Escherichia coli.	214	3.29452e-35	28	219	219	96.3	97.3	5	5	4.45	ABC	Glutamine
CBL50034.1	P0AFT2	3.A.1.3.10	gnl|BL_ORD_ID|7626 gnl|TC-DB|P0AFT2|3.A.1.3.10 Inner membrane amino-acid ABC transporter permease protein yecS - Escherichia coli.	201	1.39653e-40	39	217	222	92.2	89.6	5	5	4.8	ABC	DAP, Cystine
CBL51149.1	P54536	3.A.1.3.15	gnl|BL_ORD_ID|9592 gnl|TC-DB|P54536|3.A.1.3.15 Probable amino-acid ABC transporter permease protein yqiY - Bacillus subtilis.	212	3.35837e-46	41	215	219	96.3	96.3	5	5	3.75	ABC	Arginine
CBL50033.1	A1VZQ3	3.A.1.3.16	gnl|BL_ORD_ID|294 gnl|TC-DB|A1VZQ3|3.A.1.3.16 Amino acid ABC transporter, permease protein PEB1 - Campylobacter jejuni subsp. jejuni serotype O:23/36 (strain 81-176).	213	2.36045e-47	35	213	250	98.6	84.8	5	5	4.2	ABC	aspartate, glutamate
CBL50032.1	Q0P9X8	3.A.1.3.16	gnl|BL_ORD_ID|10952 gnl|TC-DB|Q0P9X8|3.A.1.3.16 Major cell-binding factor - Campylobacter jejuni.	255	3.86751e-39	34	272	259	90.4	96.5	1	1	0.45	ABC	aspartate, glutamate
CBL49545.1	Q9A1H0	3.A.1.3.20	gnl|BL_ORD_ID|15706 gnl|TC-DB|Q9A1H0|3.A.1.3.20 Putative glutamine-binding periplasmic protein OS=Streptococcus pyogenes serotype M1 GN=SPy_0277 PE=4 SV=1	522	1.59227e-161	47	537	522	96.3	98.1	6	5	3.3	ABC	lysine
CBL49572.1	Q9A1H0	3.A.1.3.20	gnl|BL_ORD_ID|15706 gnl|TC-DB|Q9A1H0|3.A.1.3.20 Putative glutamine-binding periplasmic protein OS=Streptococcus pyogenes serotype M1 GN=SPy_0277 PE=4 SV=1	484	5.68511e-72	30	494	522	90.9	92.3	4	5	1.55	ABC	lysine
CBL51147.1	Q8RCC4	3.A.1.3.27	gnl|BL_ORD_ID|14819 gnl|TC-DB|Q8RCC4|3.A.1.3.27 ABC-type amino acid transport system, periplasmic component OS=Caldanaerobacter subterraneus subsp. tengcongensis (strain DSM 15242 / JCM 11007 / NBRC 100824 / MB4) GN=ArtI PE=3 SV=1	260	9.6585e-36	32	271	260	93.7	94.6	1	1	0.75	ABC	Glutamine, glutamate, Asparagine
CBL49648.1	Q2FZR3	3.A.1.5.19	gnl|BL_ORD_ID|11643 gnl|TC-DB|Q2FZR3|3.A.1.5.19 Oligopeptide ABC transporter, substrate-binding protein, putative - Staphylococcus aureus (strain NCTC 8325).	542	4.49271e-128	38	542	551	98.5	97.1	1	1	0.75	ABC	Oligopeptides
CBL49647.1	Q9CIL2	3.A.1.5.25	gnl|BL_ORD_ID|15858 gnl|TC-DB|Q9CIL2|3.A.1.5.25 Oligopeptide ABC transporter substrate binding protein OS=Lactococcus lactis subsp. lactis GN=optA PE=4 SV=1	547	3.29756e-137	41	539	545	99.4	99.6	1	1	0.85	ABC	Oligopeptides, peptides
CBL51140.1	Q9CIL2	3.A.1.5.25	gnl|BL_ORD_ID|15858 gnl|TC-DB|Q9CIL2|3.A.1.5.25 Oligopeptide ABC transporter substrate binding protein OS=Lactococcus lactis subsp. lactis GN=optA PE=4 SV=1	555	1.28066e-127	40	548	545	99.6	99.6	1	1	0.85	ABC	Oligopeptides, peptides
CBL49650.1	Q9CIL1	3.A.1.5.25	gnl|BL_ORD_ID|15857 gnl|TC-DB|Q9CIL1|3.A.1.5.25 Oligopeptide ABC trasporter permease protein OS=Lactococcus lactis subsp. lactis GN=optB PE=3 SV=1	304	7.25846e-118	53	309	303	98.1	99.7	6	6	4.85	ABC	Oligopeptides, peptides
CBL49651.1	Q9CIL0	3.A.1.5.25	gnl|BL_ORD_ID|15856 gnl|TC-DB|Q9CIL0|3.A.1.5.25 Oligopeptide ABC trasporter permease protein OS=Lactococcus lactis subsp. lactis GN=optC PE=3 SV=1	326	1.72014e-99	48	343	343	93	94.2	6	5	4.85	ABC	Oligopeptides, peptides
CBL50925.1	Q64K09	3.A.1.5.25	gnl|BL_ORD_ID|13009 gnl|TC-DB|Q64K09|3.A.1.5.25 OptS OS=Lactococcus lactis GN=optS PE=4 SV=1	541	3.58456e-93	35	543	550	95.2	95.5	1	1	0.85	ABC	Oligopeptides, peptides
CBL50758.1	F0TFS5	3.A.1.5.32	gnl|BL_ORD_ID|3690 gnl|TC-DB|F0TFS5|3.A.1.5.32 Oligopeptide ABC trasporter substrate binding protein OS=Lactobacillus acidophilus (strain 30SC) GN=LAC30SC_07285 PE=4 SV=1	590	0	66	583	590	99.8	99.8	1	1	0.9	ABC	Alpha-galactosides
CBL50760.1	F0TFS8	3.A.1.5.32	gnl|BL_ORD_ID|3693 gnl|TC-DB|F0TFS8|3.A.1.5.32 Oligopeptide transport protein OS=Lactobacillus acidophilus (strain 30SC) GN=LAC30SC_07300 PE=3 SV=1	319	0	82	319	319	99.7	99.7	6	6	6.5	ABC	Alpha-galactosides
CBL49480.1	F0TFS6	3.A.1.5.32	gnl|BL_ORD_ID|3691 gnl|TC-DB|F0TFS6|3.A.1.5.32 Oligopeptide ABC transporter substrate OS=Lactobacillus acidophilus (strain 30SC) GN=LAC30SC_07290 PE=4 SV=1	586	0	66	586	583	99.5	99.7	1	1	0.9	ABC	Alpha-galactosides
CBL50759.1	F0TFS7	3.A.1.5.32	gnl|BL_ORD_ID|3692 gnl|TC-DB|F0TFS7|3.A.1.5.32 Oligopeptide ABC transporter, permease protein OS=Lactobacillus acidophilus (strain 30SC) GN=LAC30SC_07295 PE=3 SV=1	254	8.29807e-132	72	259	310	97.7	81.6	6	6	3.8	ABC	Alpha-galactosides
CBL49809.1	O51234	3.A.1.7.5	gnl|BL_ORD_ID|6279 gnl|TC-DB|O51234|3.A.1.7.5 Phosphate ABC transporter, permease protein PstC OS=Borrelia burgdorferi (strain ATCC 35210 / B31 / CIP 102532 / DSM 4680) GN=pstC PE=3 SV=1	289	4.54464e-57	37	331	302	83.7	94.7	6	6	4.6	ABC	phosphate
CBL49595.1	P16683	3.A.1.9.1	gnl|BL_ORD_ID|7982 gnl|TC-DB|P16683|3.A.1.9.1 Phosphonates transport system permease protein phnE - Escherichia coli.	251	1.97188e-50	37	263	259	95.1	95.4	6	6	4.55	ABC	Fe3+
CBL49463.1	A0QQ71	3.A.1.9.2	gnl|BL_ORD_ID|181 gnl|TC-DB|A0QQ71|3.A.1.9.2 Phosphonate-binding periplasmic protein - Mycobacterium smegmatis (strain ATCC 700084 / mc(2)155).	309	2.8515e-24	26	311	321	92.9	93.1	1	1	0	ABC	Phosphonate, phosphate
CBL50167.1	Q97Q45	3.A.1.11.7	gnl|BL_ORD_ID|15591 gnl|TC-DB|Q97Q45|3.A.1.11.7 Spermidine/putrescine ABC transporter, spermidine/putrescine-binding protein OS=Streptococcus pneumoniae serotype 4 (strain ATCC BAA-334 / TIGR4) GN=potD PE=4 SV=1	357	1.28234e-143	54	357	356	99.7	99.7	1	1	0.85	ABC	Spermidine, Putrescine
CBL50165.1	Q97Q43	3.A.1.11.7	gnl|BL_ORD_ID|15589 gnl|TC-DB|Q97Q43|3.A.1.11.7 Spermidine/putrescine ABC transporter, permease protein OS=Streptococcus pneumoniae serotype 4 (strain ATCC BAA-334 / TIGR4) GN=potH PE=3 SV=1	266	7.2141e-111	59	270	275	97.4	96.4	6	6	6.1	ABC	Spermidine, Putrescine
CBL50166.1	Q97Q44	3.A.1.11.7	gnl|BL_ORD_ID|15590 gnl|TC-DB|Q97Q44|3.A.1.11.7 Spermidine/putrescine ABC transporter, permease protein OS=Streptococcus pneumoniae serotype 4 (strain ATCC BAA-334 / TIGR4) GN=potC PE=3 SV=1	250	1.29836e-102	60	271	257	91.9	96.5	6	7	5.95	ABC	Spermidine, Putrescine
CBL50913.1	Q7A651	3.A.1.14.17	gnl|BL_ORD_ID|13641 gnl|TC-DB|Q7A651|3.A.1.14.17 IsdF protein - Staphylococcus aureus (strain N315).	317	5.26643e-67	38	308	322	99	97.5	10	9	6.45	ABC	Heme
CBL51095.1	P42364	3.A.1.15.2	gnl|BL_ORD_ID|9142 gnl|TC-DB|P42364|3.A.1.15.2 Metal ABC transporter substrate-binding lipoprotein precursor (Coaggregation-mediating adhesin) - Streptococcus gordonii Challis.	309	6.43514e-24	28	295	310	95.6	96.8	1	1	0.75	ABC	Mn2+, Zn2+
CBL51248.1	O34610	3.A.1.15.11	gnl|BL_ORD_ID|6140 gnl|TC-DB|O34610|3.A.1.15.11 Probable zinc transport system permease protein adcB OS=Bacillus subtilis GN=adcB PE=2 SV=1	260	2.03827e-33	28	264	280	97.3	92.5	7	8	6.3	ABC	Zn2+
CBL51250.1	G0LRW7	3.A.1.15.15	gnl|BL_ORD_ID|4114 gnl|TC-DB|G0LRW7|3.A.1.15.15 ABC transporter extracellular binding protein OS=Staphylococcus aureus subsp. aureus LGA251 GN=mntC PE=3 SV=1	271	1.32541e-24	27	298	309	83.2	86.1	1	1	0.65	ABC	Mn2+
CBL50405.1	Q8K8K9	3.A.1.24.3	gnl|BL_ORD_ID|14569 gnl|TC-DB|Q8K8K9|3.A.1.24.3 Putative lipoprotein (Putative uncharacterized protein SPs1626) OS=Streptococcus pyogenes serotype M3 GN=atmB PE=4 SV=1	257	3.75547e-73	46	284	281	86.3	90.7	1	1	0.75	ABC	Methionine
CBL50929.1	Q8K8K9	3.A.1.24.3	gnl|BL_ORD_ID|14569 gnl|TC-DB|Q8K8K9|3.A.1.24.3 Putative lipoprotein (Putative uncharacterized protein SPs1626) OS=Streptococcus pyogenes serotype M3 GN=atmB PE=4 SV=1	280	1.11579e-63	40	283	281	94.7	96.8	1	1	0.75	ABC	Methionine
CBL50407.1	Q04MS5	3.A.1.24.6	gnl|BL_ORD_ID|10690 gnl|TC-DB|Q04MS5|3.A.1.24.6 ABC transporter, permease protein, putative OS=Streptococcus pneumoniae serotype 2 (strain D39 / NCTC 7466) GN=SPD_0154 PE=3 SV=1	237	9.79004e-88	54	239	230	98.7	99.6	5	5	3.85	ABC	peptides
CBL50462.1	Q8Y5W0	3.A.1.25.8	gnl|BL_ORD_ID|15131 gnl|TC-DB|Q8Y5W0|3.A.1.25.8 Riboflavin transporter OS=Listeria monocytogenes serovar 1/2a (strain ATCC BAA-679 / EGD-e) GN=lmo1945 PE=3 SV=1	210	3.48274e-25	30	229	203	91.3	87.2	5	5	3.45	ABC	None
CBL49835.1	Q03S56	3.A.1.26.9	gnl|BL_ORD_ID|10651 gnl|TC-DB|Q03S56|3.A.1.26.9 Uncharacterized protein OS=Lactobacillus brevis (strain ATCC 367 / JCM 1170) GN=LVIS_0823 PE=4 SV=1	164	2.89604e-37	38	172	177	94.8	91	5	5	4.5	ABC	folate
CBL49774.1	I7BV49	3.A.1.26.10	gnl|BL_ORD_ID|4836 gnl|TC-DB|I7BV49|3.A.1.26.10 Energy-coupling factor transporter transmembrane protein EcfT OS=Enterococcus faecalis D32 GN=ecfT PE=3 SV=1	264	4.3334e-101	54	265	264	99.2	99.6	6	6	4.95	ABC	Folic acid
CBL50421.1	Q74I61	3.A.1.29.1	gnl|BL_ORD_ID|13588 gnl|TC-DB|Q74I61|3.A.1.29.1 ABC transporter permease component OS=Lactobacillus johnsonii GN=LJ_1705 PE=4 SV=1	275	1.67582e-158	77	277	276	98.9	99.3	6	6	5	ABC	Methionine precursors
CBL50423.1	Q74I63	3.A.1.29.1	gnl|BL_ORD_ID|13590 gnl|TC-DB|Q74I63|3.A.1.29.1 UPF0397 protein LJ_1703 OS=Lactobacillus johnsonii GN=LJ_1703 PE=3 SV=1	181	2.96999e-100	75	185	185	97.3	97.3	5	5	5.35	ABC	Methionine precursors
CBL50028.1	Q97RS4	3.A.1.30.2	gnl|BL_ORD_ID|15595 gnl|TC-DB|Q97RS4|3.A.1.30.2 Putative uncharacterized protein OS=Streptococcus pneumoniae serotype 4 (strain ATCC BAA-334 / TIGR4) GN=SP_0719 PE=4 SV=1	177	5.18265e-34	36	192	186	91.7	93	5	4	3.6	ABC	thiamin
CBL49529.1	Q97RS2	3.A.1.30.2	gnl|BL_ORD_ID|15593 gnl|TC-DB|Q97RS2|3.A.1.30.2 Putative uncharacterized protein OS=Streptococcus pneumoniae serotype 4 (strain ATCC BAA-334 / TIGR4) GN=SP_0721 PE=4 SV=1	209	1.22587e-14	24	217	216	95.4	94	5	6	3.85	ABC	thiamin
CBL49486.1	Q99ZY4	3.A.1.34.1	gnl|BL_ORD_ID|15696 gnl|TC-DB|Q99ZY4|3.A.1.34.1 ABC transporter permease protein OS=Streptococcus pyogenes serotype M1 GN=M5005_Spy0745 PE=4 SV=1	284	4.75686e-105	54	298	289	94.6	96.9	9	8	6.8	ABC	tryptophan
CBL49487.1	Q99ZY6	3.A.1.34.1	gnl|BL_ORD_ID|15697 gnl|TC-DB|Q99ZY6|3.A.1.34.1 ABC transporter substrate-binding protein OS=Streptococcus pyogenes serotype M1 GN=M5005_Spy0743 PE=4 SV=1	317	3.91141e-81	41	330	332	94.5	94.9	1	1	0.75	ABC	tryptophan
CBL50738.1	A7VN01	3.A.1.106.5	gnl|BL_ORD_ID|801 gnl|TC-DB|A7VN01|3.A.1.106.5 Multidrug efflux pump SmdA - Serratia marcescens.	584	2.31772e-165	42	588	591	99.1	97.8	6	6	6.35	ABC	norfloxacin, tetracycline, DAPI, Hoechst 33342
CBL50089.1	Q57403	3.A.1.111.1	gnl|BL_ORD_ID|12542 gnl|TC-DB|Q57403|3.A.1.111.1 PLASMID PAD1 (FROM ENTEROCOCCUS FAECALIS) CYLLL, CYLLS, CYLM, CLYB, CYLA GENES, COMPLETE CDS (FROM ENTEROCOCCUS FAECALIS) - Enterococcus faecalis (Streptococcus faecalis).	566	1.53632e-37	27	522	714	99.6	76.1	5	8	3.65	ABC	Hemolysins, Bacteriocins
CBL50686.1	Q00564	3.A.1.112.3	gnl|BL_ORD_ID|10479 gnl|TC-DB|Q00564|3.A.1.112.3 Lactococcin A transport ATP-binding protein lcnC - Lactococcus lactis (subsp. lactis) (Streptococcus lactis).	528	5.73412e-40	24	532	715	94	70.9	5	8	3.55	ABC	Lactococcin
CBL50805.1	Q00564	3.A.1.112.3	gnl|BL_ORD_ID|10479 gnl|TC-DB|Q00564|3.A.1.112.3 Lactococcin A transport ATP-binding protein lcnC - Lactococcus lactis (subsp. lactis) (Streptococcus lactis).	520	3.44516e-31	23	526	715	94.7	71	3	8	2.6	ABC	Lactococcin
CBL51350.1	Q6TGQ6	3.A.1.112.11	gnl|BL_ORD_ID|13345 gnl|TC-DB|Q6TGQ6|3.A.1.112.11 Enterocin CRL 35 ATP-dependent transporter OS=Enterococcus mundtii OX=53346 GN=mun B PE=4 SV=1	520	2.79115e-29	23	537	674	91.8	76.1	5	6	4.45	ABC	None
CBL51255.1	AKM79972	3.A.1.115.3	gnl|BL_ORD_ID|1194 gnl|TC-DB|AKM79972.1|3.A.1.115.3 putative ABC transporter permease protein [Candidatus Saccharibacteria bacterium GW2011_GWC2_44_17]	379	3.95704e-11	21	404	406	89.9	87.9	7	7	5.15	ABC	None
CBL51315.1	H2GZC4	3.A.1.122.11	gnl|BL_ORD_ID|4542 gnl|TC-DB|H2GZC4|3.A.1.122.11 ABC transporter system involved in hemin toxicity inner membrane protein OS=Corynebacterium diphtheriae (strain ATCC 27012 / C7 (beta)) GN=hrtB PE=4 SV=1	353	5.01325e-26	25	353	344	99.4	98.8	4	4	3.55	ABC	Hemin
CBL49984.1	F6EHL8	3.A.1.126.3	gnl|BL_ORD_ID|3909 gnl|TC-DB|F6EHL8|3.A.1.126.3 Putative exporter of polyketide antibiotics-like protein OS=Amycolicicoccus subflavus (strain DSM 45089 / DQS3-9A1) GN=AS9A_3946 PE=4 SV=1	545	1.8014e-45	26	538	537	99.6	99.3	12	12	10.45	ABC	None
CBL51086.1	P29018	3.A.1.129.1	gnl|BL_ORD_ID|8370 gnl|TC-DB|P29018|3.A.1.129.1 Transport ATP-binding protein cydD - Escherichia coli.	560	2.26083e-81	31	572	588	95.5	94.7	7	6	4.55	ABC	Cysteine, Glutathione
CBL50752.1	Q8Y5E9	3.A.1.134.12	gnl|BL_ORD_ID|15127 gnl|TC-DB|Q8Y5E9|3.A.1.134.12 Lmo2115 protein OS=Listeria monocytogenes serovar 1/2a (strain ATCC BAA-679 / EGD-e) GN=lmo2115 PE=4 SV=1	662	2.24048e-42	22	608	646	99.7	99.4	10	10	7.75	ABC	Beta-lactam antibiotics, Nisin, Gallidermin, Bacitracin
CBL50027.1	Q837P4	3.A.1.135.8	gnl|BL_ORD_ID|14002 gnl|TC-DB|Q837P4|3.A.1.135.8 ABC transporter, ATP-binding/permease protein OS=Enterococcus faecalis (strain ATCC 700802 / V583) GN=EF_0790 PE=4 SV=1	589	0	54	589	589	99.8	99.8	5	5	4.85	ABC	daunorubicin, doxorubicin, ethidium, Hoechst 33342, Fluoroquinolones
CBL50026.1	Q837P5	3.A.1.135.8	gnl|BL_ORD_ID|14003 gnl|TC-DB|Q837P5|3.A.1.135.8 ABC transporter, ATP-binding/permease protein OS=Enterococcus faecalis (strain ATCC 700802 / V583) GN=EF_0789 PE=4 SV=1	568	0	50	577	571	98.3	99.1	6	6	5.6	ABC	daunorubicin, doxorubicin, ethidium, Hoechst 33342, Fluoroquinolones
CBL51293.1	A4XGX0	3.A.1.135.10	gnl|BL_ORD_ID|535 gnl|TC-DB|A4XGX0|3.A.1.135.10 ABC transporter related protein OS=Caldicellulosiruptor saccharolyticus (strain ATCC 43494 / DSM 8903 / Tp8T 6331) OX=351627 GN=Csac_0521 PE=4 SV=1	571	3.76927e-154	41	574	578	99.1	98.6	5	7	4.9	ABC	None
CBL51292.1	A4XGX1	3.A.1.135.10	gnl|BL_ORD_ID|536 gnl|TC-DB|A4XGX1|3.A.1.135.10 ABC transporter related protein OS=Caldicellulosiruptor saccharolyticus (strain ATCC 43494 / DSM 8903 / Tp8T 6331) OX=351627 GN=Csac_0522 PE=4 SV=1	607	2.3216e-149	40	621	615	97.6	93.7	5	5	4.5	ABC	None
CBL50146.1	P77307	3.A.1.139.2	gnl|BL_ORD_ID|10106 gnl|TC-DB|P77307|3.A.1.139.2 UPF0014 inner membrane protein ybbM OS=Escherichia coli (strain K12) GN=ybbM PE=1 SV=2	246	3.11188e-89	57	252	259	97.2	94.6	7	7	6.65	ABC	Fe2+
CBL50993.1	P55340	3.A.1.143.1	gnl|BL_ORD_ID|9634 gnl|TC-DB|P55340|3.A.1.143.1 Protein ecsB OS=Bacillus subtilis (strain 168) GN=ecsB PE=4 SV=1	405	2.26068e-44	28	405	408	97	98	10	10	6.75	ABC	proteins
CBL50212.1	BAK19941	3.A.2.1.10	gnl|BL_ORD_ID|2052 gnl|TC-DB|BAK19941|3.A.2.1.10 ApH+ATPase a subunit [Aphanothece halophytica]	228	1.56916e-28	33	237	257	93.2	82.5	5	5	3.9	F-ATPase	protons, H+
CBL50213.1	BAK19942	3.A.2.1.10	gnl|BL_ORD_ID|2053 gnl|TC-DB|BAK19942|3.A.2.1.10 ApH+ATPase c subunit [Aphanothece halophytica]	73	2.45626e-16	41	74	81	97.3	88.9	2	2	2.1	F-ATPase	protons, H+
CBL51155.1	A9BJX0	3.A.3.2.21	gnl|BL_ORD_ID|973 gnl|TC-DB|A9BJX0|3.A.3.2.21 Calcium-translocating P-type ATPase, PMCA-type OS=Petrotoga mobilis (strain DSM 10674 / SJ95) GN=Pmob_0991 PE=3 SV=1	866	0	47	883	887	95.4	97.1	10	10	6.05	P-ATPase	Ca2+
CBL49968.1	Q04JJ5	3.A.3.2.28	gnl|BL_ORD_ID|10689 gnl|TC-DB|Q04JJ5|3.A.3.2.28 Cation-transporting ATPase, E1-E2 family protein OS=Streptococcus pneumoniae serotype 2 (strain D39 / NCTC 7466) GN=SPD_1383 PE=3 SV=1	890	0	59	889	898	99.2	98.2	10	10	9	P-ATPase	Ca2+, Mn2+
CBL50255.1	GAT39076	3.A.3.2.46	gnl|BL_ORD_ID|4461 gnl|TC-DB|GAT39076.1|3.A.3.2.46 ATPase [Listeria monocytogenes]	892	0	48	871	880	99.8	99.3	10	9	7.45	P-ATPase	None
CBL50700.1	Q9X6G0	3.A.3.3.3	gnl|BL_ORD_ID|17225 gnl|TC-DB|Q9X6G0|3.A.3.3.3 Cadmium/manganese transport ATPase - Lactobacillus plantarum.	743	0	51	757	758	97.2	97.5	10	9	6.8	P-ATPase	Mn2+, Cd2+
CBL51457.1	Q7A3E6	3.A.3.5.19	gnl|BL_ORD_ID|13636 gnl|TC-DB|Q7A3E6|3.A.3.5.19 Copper-transporting ATPase copA - Staphylococcus aureus (strain N315).	640	0	46	646	802	96.9	78.8	8	7	4.4	P-ATPase	Cu2+, Fe2+, Pb2+
CBL50668.1	Q8TJZ4	3.A.3.6.16	gnl|BL_ORD_ID|14935 gnl|TC-DB|Q8TJZ4|3.A.3.6.16 Cadmium efflux ATPase OS=Methanosarcina acetivorans GN=cadA PE=4 SV=1	580	1.20894e-120	35	614	647	93.2	89	8	6	4.8	P-ATPase	Heavy metal cations
CBL50403.1	Q835V4	3.A.3.23.2	gnl|BL_ORD_ID|14001 gnl|TC-DB|Q835V4|3.A.3.23.2 Cation-transporting ATPase, E1-E2 family - Enterococcus faecalis (Streptococcus faecalis).	775	0	58	800	806	95.8	95.4	11	10	6.3	P-ATPase	cations
CBL51419.1	Q830Z1	3.A.3.25.3	gnl|BL_ORD_ID|13998 gnl|TC-DB|Q830Z1|3.A.3.25.3 Cadmium-translocating P-type ATPase - Enterococcus faecalis (Streptococcus faecalis).	607	0	50	620	601	97.3	99.2	7	7	4.25	P-ATPase	cations
CBL49856.1	P0ADZ7	3.A.5.1.1	gnl|BL_ORD_ID|7551 gnl|TC-DB|P0ADZ7|3.A.5.1.1 UPF0092 membrane protein YajC OS=Escherichia coli (strain K12) GN=yajC PE=1 SV=1	95	3.06084e-09	32	130	110	70.8	85.5	1	1	0.9	Sec	proteins
CBL49765.1	P16336	3.A.5.2.1	gnl|BL_ORD_ID|7965 gnl|TC-DB|P16336|3.A.5.2.1 PREPROTEIN TRANSLOCASE SECY SUBUNIT - Bacillus subtilis.	435	1.7059e-136	48	431	431	99.8	99.5	10	10	8.9	Sec	proteins
CBL49973.1	Q15HU6	3.A.7.14.2	gnl|BL_ORD_ID|11210 gnl|TC-DB|Q15HU6|3.A.7.14.2 TcpG - Clostridium perfringens.	157	3.68013e-26	37	215	334	71.6	45.8	1	1	0.3	IVSP	DNA
CBL49630.1	Q15HU6	3.A.7.14.2	gnl|BL_ORD_ID|11210 gnl|TC-DB|Q15HU6|3.A.7.14.2 TcpG - Clostridium perfringens.	159	1.34266e-22	36	408	334	38.5	45.5	1	1	0.9	IVSP	DNA
CBL51364.1	Q15HU6	3.A.7.14.2	gnl|BL_ORD_ID|11210 gnl|TC-DB|Q15HU6|3.A.7.14.2 TcpG - Clostridium perfringens.	115	3.35433e-13	34	161	334	64.6	33.8	3	1	0	IVSP	DNA
CBL51218.1	Q15HU6	3.A.7.14.2	gnl|BL_ORD_ID|11210 gnl|TC-DB|Q15HU6|3.A.7.14.2 TcpG - Clostridium perfringens.	94	2.82462e-10	38	183	334	43.2	27.2	1	1	0	IVSP	DNA
CBL50306.1	P39695	3.A.11.1.1	gnl|BL_ORD_ID|8978 gnl|TC-DB|P39695|3.A.11.1.1 COME OPERON PROTEIN 3 - Bacillus subtilis.	755	4.09856e-75	28	762	776	94.9	96.4	13	12	4.85	DNA-T	ssDNA
CBL50305.1	P39694	3.A.11.1.1	gnl|BL_ORD_ID|8977 gnl|TC-DB|P39694|3.A.11.1.1 COME OPERON PROTEIN 1 - Bacillus subtilis.	173	2.01515e-39	41	229	205	75.1	78	1	1	0.45	DNA-T	ssDNA
CBL49854.1	AKM80389	3.A.11.1.5	gnl|BL_ORD_ID|1209 gnl|TC-DB|AKM80389.1|3.A.11.1.5 Holliday junction ATP-dependent DNA helicase RuvA [Candidatus Saccharibacteria bacterium GW2011_GWC2_44_17]	172	1.25346e-23	34	195	192	85.1	87.5	1	1	0	DNA-T	None
CBL50115.1	P21458	3.A.12.1.1	gnl|BL_ORD_ID|8100 gnl|TC-DB|P21458|3.A.12.1.1 Stage III sporulation protein E - Bacillus subtilis.	811	0	44	807	787	97.6	98.3	4	4	3.15	S-DNA-T	DNA
CBL50186.1	G2JS06	3.A.14.1.2	gnl|BL_ORD_ID|4198 gnl|TC-DB|G2JS06|3.A.14.1.2 Late competence protein ComGB OS=Listeria monocytogenes J0161 GN=LMOG_00363 PE=4 SV=1	335	9.06338e-26	24	333	343	95.8	97.4	4	5	1.9	FPE	proteins
CBL50187.1	G2JS05	3.A.14.1.2	gnl|BL_ORD_ID|4197 gnl|TC-DB|G2JS05|3.A.14.1.2 General secretion pathway protein G OS=Listeria monocytogenes J0161 GN=LMOG_00364 PE=4 SV=1	99	1.50907e-14	36	113	107	85	91.6	1	1	1.1	FPE	proteins
CBL51088.1	P0ABJ9	3.D.4.3.2	gnl|BL_ORD_ID|7506 gnl|TC-DB|P0ABJ9|3.D.4.3.2 Cytochrome d ubiquinol oxidase subunit 1 OS=Escherichia coli (strain K12) GN=cydA PE=1 SV=1	511	2.38953e-82	32	476	522	95.4	95.6	9	9	6.45	COX	H+
CBL51087.1	P0ABK2	3.D.4.3.2	gnl|BL_ORD_ID|7507 gnl|TC-DB|P0ABK2|3.D.4.3.2 Cytochrome d ubiquinol oxidase subunit 2 OS=Escherichia coli (strain K12) GN=cydB PE=1 SV=1	361	1.98794e-57	32	338	379	96.4	95	9	9	6.15	COX	H+
CBL50053.1	ART98514	4.A.1.1.19	gnl|BL_ORD_ID|1338 gnl|TC-DB|ART98514|4.A.1.1.19 PTS alpha-glucoside transporter subunit IICB [Lactobacillus gasseri]	629	0	77	626	628	99.5	99.5	11	12	9.8	Glc	alpha-glucosides
CBL51290.1	P40739	4.A.1.2.11	gnl|BL_ORD_ID|9065 gnl|TC-DB|P40739|4.A.1.2.11 PTS system, beta-glucoside-specific IIBCA component (EIIBCA-Bgl) (Beta-glucoside-permease IIBCA component) (Phosphotransferase enzyme II, BCA component) (EC 2.7.1.69) (EII-Bgl) - Bacillus subtilis.	451	1.44683e-98	34	465	609	96.6	71.8	10	10	7.2	Glc	Aryl beta-glucosides
CBL50177.1	ART98499	4.A.1.2.14	gnl|BL_ORD_ID|1337 gnl|TC-DB|ART98499|4.A.1.2.14 PTS beta-glucoside transporter subunit EIIBCA [Lactobacillus gasseri]	662	0	65	673	672	98.1	98.1	10	12	9.8	Glc	beta-glucosides
CBL51036.1	ART98499	4.A.1.2.14	gnl|BL_ORD_ID|1337 gnl|TC-DB|ART98499|4.A.1.2.14 PTS beta-glucoside transporter subunit EIIBCA [Lactobacillus gasseri]	659	8.00487e-179	42	734	672	84.3	97.2	10	12	7.15	Glc	beta-glucosides
CBL51128.1	ART98417	4.A.1.2.15	gnl|BL_ORD_ID|1336 gnl|TC-DB|ART98417|4.A.1.2.15 PTS beta-glucoside transporter subunit EIIBCA [Lactobacillus gasseri]	635	0	77	635	624	99.8	99.8	7	7	6.65	Glc	beta-glucosides
CBL49847.1	ART98386	4.A.1.2.16	gnl|BL_ORD_ID|1335 gnl|TC-DB|ART98386|4.A.1.2.16 PTS beta-glucoside transporter subunit EIIBCA [Lactobacillus gasseri]	646	0	80	649	647	99.4	99.5	9	10	8.35	Glc	beta glucosides
CBL51092.1	S6FVR4	4.A.1.2.17	gnl|BL_ORD_ID|17738 gnl|TC-DB|S6FVR4|4.A.1.2.17 PTS system N-acetylmuramic acid-specific EIIBC component OS=Bacillus velezensis UCMB5033 OX=1338518 GN=murP PE=4 SV=1	468	4.79965e-126	47	656	455	71	97.1	10	12	6.05	Glc	None
CBL49914.1	P42956	4.A.2.1.5	gnl|BL_ORD_ID|9171 gnl|TC-DB|P42956|4.A.2.1.5 PTS system, mannitol-specific IICBA component (EIICBA-Mtl) (Mannitol- permease IICBA component) (Phosphotransferase enzyme II, CBA component) (EC 2.7.1.69) (EII-Mtl) - Bacillus subtilis.	476	0	59	593	478	79.4	99	10	9	8.9	Fru	mannitol
CBL51252.1	Q1LZ59	4.A.2.1.7	gnl|BL_ORD_ID|11441 gnl|TC-DB|Q1LZ59|4.A.2.1.7 Inducible fructose permease - Streptococcus mutans UA159.	676	0	48	665	655	98.6	99.5	10	10	8.05	Fru	fructose, Xylitol
CBL51022.1	P46317	4.A.3.2.2	gnl|BL_ORD_ID|9292 gnl|TC-DB|P46317|4.A.3.2.2 PTS SYSTEM, CELLOBIOSE-SPECIFIC IIC COMPONENT (EIIC-CEL) (CELLOBIOSE- PERMEASE IIC COMPONENT) (PHOSPHOTRANSFERASE ENZYME II, C COMPONENT) - Bacillus subtilis.	435	7.67294e-68	30	434	452	98.2	95.6	11	10	7.75	Lac	Lichenan oligosaccharides
CBL50069.1	Q9CJ32	4.A.3.2.4	gnl|BL_ORD_ID|15861 gnl|TC-DB|Q9CJ32|4.A.3.2.4 Cellobiose-specific PTS system IIC component - Lactococcus lactis subsp. lactis (Streptococcus lactis).	488	6.62122e-99	36	442	494	96.6	98.6	10	9	4.95	Lac	Cellobiose
CBL50874.1	Q9KSH4	4.A.3.2.6	gnl|BL_ORD_ID|16337 gnl|TC-DB|Q9KSH4|4.A.3.2.6 PTS system, cellobiose-specific IIC component OS=Vibrio cholerae GN=VC_1282 PE=4 SV=1	435	9.12257e-65	31	438	446	97	96.6	12	10	8.35	Lac	Glucoseamine
CBL51010.1	Q72XQ0	4.A.3.2.8	gnl|BL_ORD_ID|13512 gnl|TC-DB|Q72XQ0|4.A.3.2.8 PTS system, cellobiose-specific IIC component OS=Bacillus cereus (strain ATCC 10987) GN=celB PE=1 SV=1	448	2.58592e-86	35	446	433	98.4	99.8	10	10	7.4	Lac	N-, N'-diacetylchitobiose
CBL51047.1	Q72XQ0	4.A.3.2.8	gnl|BL_ORD_ID|13512 gnl|TC-DB|Q72XQ0|4.A.3.2.8 PTS system, cellobiose-specific IIC component OS=Bacillus cereus (strain ATCC 10987) GN=celB PE=1 SV=1	415	1.94287e-84	36	430	433	93	94.7	12	10	7.25	Lac	N-, N'-diacetylchitobiose
CBL50345.1	Q72XQ0	4.A.3.2.8	gnl|BL_ORD_ID|13512 gnl|TC-DB|Q72XQ0|4.A.3.2.8 PTS system, cellobiose-specific IIC component OS=Bacillus cereus (strain ATCC 10987) GN=celB PE=1 SV=1	460	1.49498e-78	32	471	433	96.4	98.6	10	10	4.7	Lac	N-, N'-diacetylchitobiose
CBL50340.1	Q72XQ0	4.A.3.2.8	gnl|BL_ORD_ID|13512 gnl|TC-DB|Q72XQ0|4.A.3.2.8 PTS system, cellobiose-specific IIC component OS=Bacillus cereus (strain ATCC 10987) GN=celB PE=1 SV=1	447	7.93418e-67	34	450	433	95.3	97	10	10	4.9	Lac	N-, N'-diacetylchitobiose
CBL49906.1	Q2QKM2	4.A.6.1.6	gnl|BL_ORD_ID|11712 gnl|TC-DB|Q2QKM2|4.A.6.1.6 EIID - Lactobacillus casei.	303	2.77062e-164	70	306	303	98.7	99	4	4	2.85	Man	glucose
CBL49905.1	Q04GK0	4.A.6.1.10	gnl|BL_ORD_ID|10687 gnl|TC-DB|Q04GK0|4.A.6.1.10 Mannose-specific PTS system component IIC OS=Oenococcus oeni (strain BAA-331 / PSU-1) GN=OEOE_0465 PE=4 SV=1	272	2.00107e-142	76	269	271	99.6	99.6	7	7	6.55	Man	glucose, fructose
CBL49904.1	E1UCI0	4.A.6.1.15	gnl|BL_ORD_ID|3244 gnl|TC-DB|E1UCI0|4.A.6.1.15 PTS system, mannose-specific, IIAB component OS=Listeria monocytogenes serotype 4a (strain L99) GN=manL PE=4 SV=1	333	4.33623e-135	59	335	321	98.5	98.8	1	1	0.8	Man	glucose, Mannose
CBL50884.1	V7RGM6	4.A.6.1.19	gnl|BL_ORD_ID|18090 gnl|TC-DB|V7RGM6|4.A.6.1.19 PTS mannose transporter subunit IID OS=Salmonella enterica subsp. enterica serovar Give var. 15 str. CFSAN004343 GN=CFSAN004343_08870 PE=4 SV=1	259	1.14596e-71	41	275	278	93.8	92.4	6	8	5.15	Man	Glucoselysine, Fructoselysine
CBL50885.1	V7RE14	4.A.6.1.19	gnl|BL_ORD_ID|18089 gnl|TC-DB|V7RE14|4.A.6.1.19 PTS sugar transporter OS=Salmonella enterica subsp. enterica serovar Give var. 15 str. CFSAN004343 GN=CFSAN004343_08875 PE=4 SV=1	260	1.61462e-63	40	262	259	98.9	99.2	7	6	4.85	Man	Glucoselysine, Fructoselysine
CBL50251.1	Q55487	4.D.1.1.14	gnl|BL_ORD_ID|12444 gnl|TC-DB|Q55487|4.D.1.1.14 Uncharacterized glycosyltransferase sll0501 OS=Synechocystis sp. (strain PCC 6803 / Kazusa) GN=sll0501 PE=3 SV=1	305	3.36995e-73	38	309	318	98.4	94.7	2	2	2.15	VGP	None
CBL49893.1	C9XJW8	4.D.2.1.7	gnl|BL_ORD_ID|2548 gnl|TC-DB|C9XJW8|4.D.2.1.7 Putative ABC transporter, permease protein OS=Clostridium difficile (strain CD196) GN=CD196_1967 PE=4 SV=1	318	1.24047e-24	23	341	360	91.5	86.9	7	8	6.35	GT2	Unknown
CBL50120.1	Q6ADZ6	4.F.1.1.7	gnl|BL_ORD_ID|13063 gnl|TC-DB|Q6ADZ6|4.F.1.1.7 CDP-diacylglycerol--glycerol-3-phosphate 3-phosphatidyltransferase OS=Leifsonia xyli subsp. xyli (strain CTCB07) GN=pgsA PE=3 SV=1	185	1.28831e-30	37	186	189	95.2	92.1	4	5	3.5	CEPT1	phosphate
CBL51303.1	Q8Y437	5.B.14.1.1	gnl|BL_ORD_ID|15123 gnl|TC-DB|Q8Y437|5.B.14.1.1 FAD:protein FMN transferase OS=Listeria monocytogenes serovar 1/2a (strain ATCC BAA-679 / EGD-e) OX=169963 GN=lmo2636 PE=3 SV=1	292	4.97351e-65	41	309	360	92.2	79.7	2	1	0	F-EET	None
CBL51082.1	Q8Y433	5.B.14.1.1	gnl|BL_ORD_ID|15119 gnl|TC-DB|Q8Y433|5.B.14.1.1 Lmo2641 protein OS=Listeria monocytogenes serovar 1/2a (strain ATCC BAA-679 / EGD-e) OX=169963 GN=lmo2641 PE=3 SV=1	324	5.72593e-64	35	329	326	97.9	97.9	1	1	0.8	F-EET	None
CBL51081.1	Q8Y438	5.B.14.1.1	gnl|BL_ORD_ID|15124 gnl|TC-DB|Q8Y438|5.B.14.1.1 Lmo2635 protein OS=Listeria monocytogenes serovar 1/2a (strain ATCC BAA-679 / EGD-e) OX=169963 GN=lmo2635 PE=4 SV=1	314	8.94163e-62	37	299	319	99.3	98.1	7	9	4.1	F-EET	None
CBL51208.1	P39850	8.A.3.2.1	gnl|BL_ORD_ID|8997 gnl|TC-DB|P39850|8.A.3.2.1 CAPA protein - Staphylococcus aureus.	260	3.40785e-30	30	292	221	88.4	98.6	3	2	1.3	MPA1-C or MPA1+C	NONE
CBL50979.1	P0AA53	8.A.21.2.2	gnl|BL_ORD_ID|7442 gnl|TC-DB|P0AA53|8.A.21.2.2 Protein QmcA OS=Escherichia coli (strain K12) GN=qmcA PE=1 SV=1	300	1.065e-31	27	293	305	97.6	98	1	1	0.9	Stomatin	NONE
CBL50197.1	C5F3G8	9.A.32.2.2	gnl|BL_ORD_ID|2338 gnl|TC-DB|C5F3G8|9.A.32.2.2 Uncharacterized protein OS=Lactobacillus paracasei subsp. paracasei 8700:2 GN=LBPG_00775 PE=4 SV=1	133	5.7388e-29	39	129	131	99.2	98.5	3	3	2.6	9.A.32	Unknown
CBL49532.1	P23894	9.B.1.1.6	gnl|BL_ORD_ID|8200 gnl|TC-DB|P23894|9.B.1.1.6 Protease HtpX OS=Escherichia coli (strain K12) GN=htpX PE=1 SV=1	286	1.41055e-28	34	298	293	93.6	92.8	4	4	3.2	CAAX Protease	proteins
CBL51425.1	C7T7I3	9.B.2.1.18	gnl|BL_ORD_ID|2468 gnl|TC-DB|C7T7I3|9.B.2.1.18 Putative protease OS=Lactobacillus rhamnosus (strain ATCC 53103 / GG) GN=LRHM_2521 PE=4 SV=1	207	2.12457e-21	28	217	215	93.1	93	5	6	3.75	CAAX Protease2	Unknown
CBL49469.1	P0AFV2	9.B.20.1.4	gnl|BL_ORD_ID|7629 gnl|TC-DB|P0AFV2|9.B.20.1.4 Putative magnesium transporter YhiD OS=Escherichia coli (strain K12) GN=yhiD PE=3 SV=1	190	2.12979e-48	42	233	215	81.1	85.1	4	4	3.1	MgtC	Mg2+
CBL49884.1	P0ABP6	9.B.27.2.3	gnl|BL_ORD_ID|7516 gnl|TC-DB|P0ABP6|9.B.27.2.3 Protein dedA OS=Escherichia coli (strain K12) GN=dedA PE=1 SV=1	208	3.05958e-63	46	216	219	94.9	93.2	5	6	4.5	DedA	Selenite
CBL50442.1	D6GX19	9.B.27.2.5	gnl|BL_ORD_ID|3019 gnl|TC-DB|D6GX19|9.B.27.2.5 SNARE associated protein OS=Candidatus Parvarchaeum acidophilus ARMAN-5 GN=BJBARM5_1043 PE=4 SV=1	192	4.12701e-35	35	204	206	91.7	88.3	5	5	4.9	DedA	Unknown
CBL51409.1	BAQ24849	9.B.28.2.7	gnl|BL_ORD_ID|2063 gnl|TC-DB|BAQ24849.1|9.B.28.2.7 uncharacterized protein SRT_15880 [Streptococcus troglodytae]	243	5.16624e-43	37	238	245	99.2	93.1	4	4	3	MusI	None
CBL49536.1	WP_084131416	9.B.28.5.1	gnl|BL_ORD_ID|18788 gnl|TC-DB|WP_084131416.1|9.B.28.5.1 hypothetical protein [Enterococcus aquimarinus]	582	3.98156e-95	33	592	598	95.1	96.3	7	7	6.7	MusI	None
CBL50596.1	Q45064	9.B.31.1.2	gnl|BL_ORD_ID|11995 gnl|TC-DB|Q45064|9.B.31.1.2 Glycerol-3-phosphate acyltransferase OS=Bacillus subtilis (strain 168) GN=plsY PE=1 SV=1	186	9.64335e-55	49	211	193	87.7	94.8	6	5	4.7	PlsY	Unknown
CBL50139.1	WP_095837247	9.B.36.1.4	gnl|BL_ORD_ID|18893 gnl|TC-DB|WP_095837247.1|9.B.36.1.4 HdeD family acid-resistance protein [Chitinophaga sp. MD30]	167	1.68774e-11	23	180	183	91.7	89.6	6	6	6	HdeD	None
CBL50903.1	F0Z2G1	9.B.104.1.3	gnl|BL_ORD_ID|3708 gnl|TC-DB|F0Z2G1|9.B.104.1.3 Putative small hydrophobic molecule transporter protein OS=Clostridium sp. D5 GN=HMPREF0240_03287 PE=4 SV=1	195	1.55314e-36	36	228	223	82.5	86.5	7	6	4.8	Rhomboid	Unknown
CBL51234.1	F2M2W9	9.B.120.1.4	gnl|BL_ORD_ID|3762 gnl|TC-DB|F2M2W9|9.B.120.1.4 Transport protein OS=Lactobacillus amylovorus (strain GRL 1118) GN=LAB52_08790 PE=4 SV=1	229	9.31002e-153	91	229	229	99.6	99.6	8	8	6.55	DUF554	Unknown
CBL50075.1	D0DT64	9.B.126.2.5	gnl|BL_ORD_ID|2616 gnl|TC-DB|D0DT64|9.B.126.2.5 YihY family protein OS=Lactobacillus fermentum 28-3-CHN GN=HMPREF0513_00853 PE=4 SV=1	268	5.29756e-47	31	307	299	87	87.3	6	6	5.55	YhjD	Unknown
CBL49578.1	H3P2R4	9.B.141.1.2	gnl|BL_ORD_ID|4574 gnl|TC-DB|H3P2R4|9.B.141.1.2 Hypothetical membrane protein, YibE/F family OS=Lactobacillus plantarum subsp. plantarum NC8 GN=nc8_0863 PE=4 SV=1	243	1.22033e-61	41	261	254	92.7	95.3	6	6	6.2	YibE/F	Unknown
CBL49577.1	C7TAQ3	9.B.141.1.3	gnl|BL_ORD_ID|2473 gnl|TC-DB|C7TAQ3|9.B.141.1.3 Uncharacterized protein OS=Lactobacillus rhamnosus (strain ATCC 53103 / GG) GN=LRHM_0777 PE=4 SV=1	317	4.48874e-53	32	377	355	83.8	87.6	8	9	6.3	YibE/F	Unknown
CBL50589.1	Q8PUP5	9.B.143.2.3	gnl|BL_ORD_ID|14779 gnl|TC-DB|Q8PUP5|9.B.143.2.3 Putative uncharacterized protein OS=Methanosarcina mazei (strain ATCC BAA-159 / DSM 3647 / Goe1 / Go1 / JCM 11833 / OCM 88) GN=MM_2287 PE=4 SV=1	233	1.43844e-28	31	231	277	97.4	81.9	6	6	4.9	DUF1275	Unknown
CBL50907.1	WP_071420629	9.B.144.1.6	gnl|BL_ORD_ID|18686 gnl|TC-DB|WP_071420629.1|9.B.144.1.6 hypothetical protein, partial [Oenococcus oeni]	844	1.20225e-116	31	878	844	93.3	97.7	14	15	6.35	DUF3367	None
CBL50272.1	P0A6W3	9.B.146.1.6	gnl|BL_ORD_ID|7405 gnl|TC-DB|P0A6W3|9.B.146.1.6 Phospho-N-acetylmuramoyl-pentapeptide-transferase OS=Escherichia coli (strain K12) GN=mraY PE=1 SV=1	324	7.75238e-68	39	322	360	94.1	88.9	10	10	6.15	MurG	Unknown
CBL50726.1	O31754	9.B.149.2.1	gnl|BL_ORD_ID|6077 gnl|TC-DB|O31754|9.B.149.2.1 Regulator of sigma-W protease RasP OS=Bacillus subtilis (strain 168) GN=rasP PE=1 SV=1	418	1.44193e-96	38	418	422	98.8	98.6	4	4	3.7	M50-P	None
CBL50264.1	Q01465	9.B.157.1.1	gnl|BL_ORD_ID|10509 gnl|TC-DB|Q01465|9.B.157.1.1 Rod shape-determining protein MreB OS=Bacillus subtilis (strain 168) GN=mreB PE=3 SV=3	335	3.18428e-155	64	334	337	98.5	98.5	1	1	0.5	MreBCD	Folic acid
CBL50265.1	Q9K8H6	9.B.157.1.2	gnl|BL_ORD_ID|16279 gnl|TC-DB|Q9K8H6|9.B.157.1.2 Cell shape-determining protein MreC OS=Bacillus halodurans (strain ATCC BAA-125 / DSM 18197 / FERM 7344 / JCM 9153 / C-125) GN=mreC PE=3 SV=1	282	1.75778e-42	34	283	293	98.2	94.5	1	1	0.9	MreBCD	Folic acid
CBL51294.1	Q03CJ3	9.B.182.1.1	gnl|BL_ORD_ID|10641 gnl|TC-DB|Q03CJ3|9.B.182.1.1 Uncharacterized membrane-bound protein conserved in bacteria OS=Lactobacillus casei (strain ATCC 334) GN=LSEI_0216 PE=4 SV=1	249	2.39506e-32	31	261	273	92	87.9	4	4	3.55	DUF1129	Unknown
CBL50601.1	WP_089150175	9.B.244.1.2	gnl|BL_ORD_ID|18829 gnl|TC-DB|WP_089150175.1|9.B.244.1.2 hypothetical protein [Lactobacillus crispatus]	251	5.0317e-84	49	251	264	98.8	94.7	6	6	4.6	UBP3	None
CBL49740.1	KPJ73630	9.B.252.3.6	gnl|BL_ORD_ID|5283 gnl|TC-DB|KPJ73630.1|9.B.252.3.6 hypothetical protein AMJ48_00120 [Parcubacteria bacterium DG_74_1]	251	1.25157e-15	27	227	272	96	91.5	9	8	5.8	UPUB6	None
CBL49729.1	O67077	9.B.307.1.1	gnl|BL_ORD_ID|6432 gnl|TC-DB|O67077|9.B.307.1.1 ATP-dependent zinc metalloprotease FtsH OS=Aquifex aeolicus (strain VF5) OX=224324 GN=ftsH PE=1 SV=1	560	2.0823e-171	49	722	634	75.8	87.9	2	2	0.9	FtsH	None
CBL50133.1	WP_063487264	9.B.330.4.2	gnl|BL_ORD_ID|18626 gnl|TC-DB|WP_063487264.1|9.B.330.4.2 prolipoprotein diacylglyceryl transferase [Lactobacillus plantarum]	267	1.19303e-91	49	279	272	95.3	96	7	7	5.2	DUF4013	None
CBL51458.1	D6ZSR9	1.A.1.5.25	gnl|BL_ORD_ID|3056 gnl|TC-DB|D6ZSR9|1.A.1.5.25 Putative transcriptional regulator, Crp/Fnr family OS=Bifidobacterium longum subsp. longum (strain JDM301) GN=BLJ_0448 PE=4 SV=1	217	5.08809e-09	24	214	239	93.5	86.6	0	0	None	VIC	Unknown
CBL50713.1	G4NXA5	1.A.33.1.4	gnl|BL_ORD_ID|4272 gnl|TC-DB|G4NXA5|1.A.33.1.4 Chaperone protein DnaK OS=Bacillus subtilis subsp. spizizenii TU-B-10 GN=dnaK PE=3 SV=1	621	0	71	617	611	99.8	99.7	0	0	None	Hsp70	ions
CBL49807.1	Q9ZK21	1.C.82.1.1	gnl|BL_ORD_ID|17436 gnl|TC-DB|Q9ZK21|1.C.82.1.1 50S ribosomal protein L1 - Helicobacter pylori J99 (Campylobacter pylori J99).	216	2.68138e-81	55	230	234	93.5	91.9	0	0	None	HP2-20	small molecules
CBL50784.1	J8IXD8	1.C.109.1.5	gnl|BL_ORD_ID|4937 gnl|TC-DB|J8IXD8|1.C.109.1.5 Hemolysin TlyA family protein OS=Bacillus cereus VD078 GN=III_01305 PE=4 SV=1	265	4.06388e-94	55	270	279	97.4	94.3	1	0	None	B-Hemolysin A	small molecules
CBL50086.1	WP_097001274	1.C.126.1.3	gnl|BL_ORD_ID|18901 gnl|TC-DB|WP_097001274.1|1.C.126.1.3 CBS domain-containing protein [Francisella tularensis]	235	1.09536e-42	32	239	286	94.1	80.8	0	0	None	HlyC	None
CBL51412.1	P39579	2.A.50.2.1	gnl|BL_ORD_ID|8964 gnl|TC-DB|P39579|2.A.50.2.1 D-alanyl carrier protein OS=Bacillus subtilis (strain 168) OX=224308 GN=dltC PE=1 SV=1	78	8.78425e-20	44	79	78	96.2	98.7	0	0	None	GUP	Alanine
CBL51119.1	Q8TZQ3	3.A.1.1.16	gnl|BL_ORD_ID|14964 gnl|TC-DB|Q8TZQ3|3.A.1.1.16 Putative sugar transport ATP-hydrolyzing - Pyrococcus furiosus.	352	1.10721e-84	40	362	370	92.5	93.5	0	0	None	ABC	Maltooligosaccharides
CBL50851.1	Q7WWQ6	3.A.1.1.20	gnl|BL_ORD_ID|13895 gnl|TC-DB|Q7WWQ6|3.A.1.1.20 ATP-binding protein MsmK - Lactobacillus acidophilus.	370	0	74	370	368	99.7	99.7	0	0	None	ABC	Fructooligosaccharides
CBL49949.1	Q7WWQ6	3.A.1.1.20	gnl|BL_ORD_ID|13895 gnl|TC-DB|Q7WWQ6|3.A.1.1.20 ATP-binding protein MsmK - Lactobacillus acidophilus.	368	0	94	368	368	99.7	99.7	0	0	None	ABC	Fructooligosaccharides
CBL51340.1	Q7WWQ6	3.A.1.1.20	gnl|BL_ORD_ID|13895 gnl|TC-DB|Q7WWQ6|3.A.1.1.20 ATP-binding protein MsmK - Lactobacillus acidophilus.	368	0	85	368	368	99.7	99.7	0	0	None	ABC	Fructooligosaccharides
CBL50546.1	Q5SLB4	3.A.1.1.50	gnl|BL_ORD_ID|12827 gnl|TC-DB|Q5SLB4|3.A.1.1.50 Sugar ABC transporter, periplasmic sugar-binding protein OS=Thermus thermophilus (strain HB8 / ATCC 27634 / DSM 579) GN=TTHA0379 PE=4 SV=1	400	6.12227e-33	27	425	417	91.1	92.3	1	0	None	ABC	glycerophosphocholine
CBL51432.1	Q8DU37	3.A.1.2.12	gnl|BL_ORD_ID|14281 gnl|TC-DB|Q8DU37|3.A.1.2.12 Putative sugar ABC transporter, ATP-binding protein - Streptococcus mutans.	506	0	60	512	510	98.2	99	0	0	None	ABC	Deoxyribonucleosides
CBL51148.1	P10346	3.A.1.3.2	gnl|BL_ORD_ID|7758 gnl|TC-DB|P10346|3.A.1.3.2 Glutamine transport ATP-binding protein glnQ - Escherichia coli.	207	2.14883e-60	46	206	240	95.6	85.8	0	1	None	ABC	Glutamine
CBL50935.1	P0AAG3	3.A.1.3.4	gnl|BL_ORD_ID|7465 gnl|TC-DB|P0AAG3|3.A.1.3.4 Glutamate/aspartate transport ATP-binding protein gltL - Escherichia coli.	237	6.49624e-83	51	246	241	95.9	97.5	0	0	None	ABC	glutamate
CBL49544.1	Q9A1H1	3.A.1.3.20	gnl|BL_ORD_ID|15707 gnl|TC-DB|Q9A1H1|3.A.1.3.20 Amino acid transport ATP-binding protein OS=Streptococcus pyogenes serotype M1 GN=M5005_Spy0235 PE=4 SV=1	240	5.45757e-106	61	251	246	94.8	97.2	0	0	None	ABC	lysine
CBL49573.1	Q9F3K7	3.A.1.3.24	gnl|BL_ORD_ID|15925 gnl|TC-DB|Q9F3K7|3.A.1.3.24 ATP-binding protein OS=Streptomyces coelicolor (strain ATCC BAA-471 / A3(2) / M145) GN=SCO5258 PE=3 SV=1	253	6.21795e-98	58	245	253	99.6	99.6	0	0	None	ABC	Amino acids
CBL50031.1	Q9CES4	3.A.1.3.25	gnl|BL_ORD_ID|15848 gnl|TC-DB|Q9CES4|3.A.1.3.25 Glutamine ABC transporter ATP-binding protein OS=Lactococcus lactis subsp. lactis (strain IL1403) GN=glnQ PE=3 SV=1	240	5.75087e-95	58	246	247	97.2	96.8	0	0	None	ABC	glutamate, Asparagine, Glutamine
CBL49653.1	Q2FZR4	3.A.1.5.19	gnl|BL_ORD_ID|11644 gnl|TC-DB|Q2FZR4|3.A.1.5.19 Oligopeptide ABC transporter, ATP-binding protein, putative - Staphylococcus aureus (strain NCTC 8325).	308	6.74885e-139	62	314	313	97.5	97.4	0	0	None	ABC	Oligopeptides
CBL49960.1	Q2FZR3	3.A.1.5.19	gnl|BL_ORD_ID|11643 gnl|TC-DB|Q2FZR3|3.A.1.5.19 Oligopeptide ABC transporter, substrate-binding protein, putative - Staphylococcus aureus (strain NCTC 8325).	518	6.86265e-107	37	527	551	97	93.3	0	1	None	ABC	Oligopeptides
CBL49652.1	Q9CIK9	3.A.1.5.25	gnl|BL_ORD_ID|15855 gnl|TC-DB|Q9CIK9|3.A.1.5.25 Oligopeptide ABC trasporter ATP binding protein OS=Lactococcus lactis subsp. lactis GN=optD PE=4 SV=1	346	6.39982e-172	68	352	349	97.2	98.9	1	0	None	ABC	Oligopeptides, peptides
CBL50762.1	F0TFT0	3.A.1.5.32	gnl|BL_ORD_ID|3695 gnl|TC-DB|F0TFT0|3.A.1.5.32 Oligopeptide ABC transporter OS=Lactobacillus acidophilus (strain 30SC) GN=LAC30SC_07310 PE=4 SV=1	342	0	95	338	342	99.7	99.7	0	0	None	ABC	Alpha-galactosides
CBL50761.1	F0TFS9	3.A.1.5.32	gnl|BL_ORD_ID|3694 gnl|TC-DB|F0TFS9|3.A.1.5.32 Oligopeptide ABC transporter ATP-binding protein OS=Lactobacillus acidophilus (strain 30SC) GN=LAC30SC_07305 PE=3 SV=1	327	0	91	322	328	99.7	99.1	0	0	None	ABC	Alpha-galactosides
CBL49812.1	O51236	3.A.1.7.5	gnl|BL_ORD_ID|6281 gnl|TC-DB|O51236|3.A.1.7.5 Phosphate import ATP-binding protein PstB OS=Borrelia burgdorferi (strain ATCC 35210 / B31 / CIP 102532 / DSM 4680) GN=pstB PE=3 SV=1	248	4.773e-103	56	251	260	98.4	95	0	0	None	ABC	phosphate
CBL49811.1	O51236	3.A.1.7.5	gnl|BL_ORD_ID|6281 gnl|TC-DB|O51236|3.A.1.7.5 Phosphate import ATP-binding protein PstB OS=Borrelia burgdorferi (strain ATCC 35210 / B31 / CIP 102532 / DSM 4680) GN=pstB PE=3 SV=1	257	7.08956e-89	53	264	260	96.2	98.1	0	0	None	ABC	phosphate
CBL49808.1	O51233	3.A.1.7.5	gnl|BL_ORD_ID|6278 gnl|TC-DB|O51233|3.A.1.7.5 Phosphate ABC transporter, periplasmic phosphate-binding protein OS=Borrelia burgdorferi (strain ATCC 35210 / B31 / CIP 102532 / DSM 4680) GN=BB_0215 PE=4 SV=2	281	4.46373e-22	26	288	279	91	98.6	1	0	None	ABC	phosphate
CBL50164.1	Q97Q42	3.A.1.11.7	gnl|BL_ORD_ID|15588 gnl|TC-DB|Q97Q42|3.A.1.11.7 Spermidine/putrescine import ATP-binding protein PotA OS=Streptococcus pneumoniae serotype 4 (strain ATCC BAA-334 / TIGR4) GN=potA PE=3 SV=1	364	2.06603e-156	61	365	385	98.9	94.3	0	0	None	ABC	Spermidine, Putrescine
CBL50912.1	P72592	3.A.1.14.24	gnl|BL_ORD_ID|9954 gnl|TC-DB|P72592|3.A.1.14.24 Iron(III) dicitrate transport system permease protein FecE OS=Synechocystis sp. (strain PCC 6803 / Kazusa) OX=1111708 GN=fecE PE=4 SV=1	241	9.16549e-61	40	257	268	93	89.6	0	0	None	ABC	None
CBL51249.1	P0A9X1	3.A.1.15.5	gnl|BL_ORD_ID|7437 gnl|TC-DB|P0A9X1|3.A.1.15.5 Zinc import ATP-binding protein znuC - Escherichia coli.	197	6.49527e-35	35	215	251	91.2	76.1	0	0	None	ABC	Zn2+
CBL50406.1	Q04MS6	3.A.1.24.6	gnl|BL_ORD_ID|10691 gnl|TC-DB|Q04MS6|3.A.1.24.6 ABC transporter, ATP-binding protein OS=Streptococcus pneumoniae serotype 2 (strain D39 / NCTC 7466) GN=SPD_0153 PE=3 SV=1	342	2.28666e-110	51	354	353	95.2	96	0	0	None	ABC	peptides
CBL49773.1	Q839D4	3.A.1.26.10	gnl|BL_ORD_ID|14009 gnl|TC-DB|Q839D4|3.A.1.26.10 Cobalt import ATP-binding protein CbiO 2 OS=Enterococcus faecalis GN=cbiO2 PE=3 SV=2	283	2.53762e-105	54	281	289	99.3	97.6	0	0	None	ABC	Folic acid
CBL49772.1	Q839D5	3.A.1.26.10	gnl|BL_ORD_ID|14011 gnl|TC-DB|Q839D5|3.A.1.26.10 Cobalt import ATP-binding protein CbiO 1 OS=Enterococcus faecalis GN=cbiO1 PE=3 SV=1	278	1.13571e-99	54	283	279	97.5	98.2	0	0	None	ABC	Folic acid
CBL50422.1	Q74I62	3.A.1.29.1	gnl|BL_ORD_ID|13589 gnl|TC-DB|Q74I62|3.A.1.29.1 Putative ABC transporter ATP-binding protein LJ_1704 OS=Lactobacillus johnsonii GN=LJ_1704 PE=3 SV=1	564	0	71	569	573	98.9	98.3	0	0	None	ABC	Methionine precursors
CBL49530.1	Q97RS3	3.A.1.30.2	gnl|BL_ORD_ID|15594 gnl|TC-DB|Q97RS3|3.A.1.30.2 ABC transporter, ATP-binding protein OS=Streptococcus pneumoniae serotype 4 (strain ATCC BAA-334 / TIGR4) GN=SP_0720 PE=3 SV=1	448	3.33911e-59	31	450	461	93.3	90	0	0	None	ABC	thiamin
CBL49485.1	Q99ZY3	3.A.1.34.1	gnl|BL_ORD_ID|15695 gnl|TC-DB|Q99ZY3|3.A.1.34.1 Putative ABC transporter (ATP-binding protein) OS=Streptococcus pyogenes serotype M1 GN=SPy_1019 PE=4 SV=1	251	2.09859e-83	51	253	252	98.8	99.2	0	1	None	ABC	tryptophan
CBL50967.1	J8ABC0	3.A.1.105.9	gnl|BL_ORD_ID|4935 gnl|TC-DB|J8ABC0|3.A.1.105.9 Uncharacterized protein OS=Bacillus cereus BAG4X12-1 GN=IE9_00061 PE=3 SV=1	303	4.61286e-39	28	308	310	96.4	96.5	0	1	None	ABC	Unknown
CBL51310.1	O50296	3.A.1.114.1	gnl|BL_ORD_ID|6243 gnl|TC-DB|O50296|3.A.1.114.1 ATP-BINDING SUBUNIT - Anabaena variabilis.	59	3.33333e-12	46	61	244	95.1	23.8	0	0	None	ABC	Glycolipids
CBL51257.1	AKM79973	3.A.1.115.3	gnl|BL_ORD_ID|1195 gnl|TC-DB|AKM79973|3.A.1.115.3 putative ABC transporter protein, ATP biding [Candidatus Saccharibacteria bacterium GW2011_GWC2_44_17]	217	8.89556e-51	37	222	254	96.8	85	0	0	None	ABC	None
CBL50384.1	P39115	3.A.1.121.3	gnl|BL_ORD_ID|8924 gnl|TC-DB|P39115|3.A.1.121.3 Nucleotide binding protein expZ - Bacillus subtilis.	508	1.91281e-51	26	503	547	98.8	86.5	0	0	None	ABC	Virginiamymycin, Lincomycin
CBL49983.1	F6EHL9	3.A.1.126.3	gnl|BL_ORD_ID|3910 gnl|TC-DB|F6EHL9|3.A.1.126.3 Putative ABC transporter ATP-binding subunit OS=Hoyosella subflava (strain DSM 45089 / JCM 17490 / NBRC 109087 / DQS3-9A1) OX=443218 GN=AS9A_3947 PE=4 SV=1	290	2.92345e-91	49	305	303	94.8	94.4	0	0	None	ABC	None
CBL50636.1	Q99ZC8	3.A.1.132.6	gnl|BL_ORD_ID|15694 gnl|TC-DB|Q99ZC8|3.A.1.132.6 ABC transporter ATP-binding protein OS=Streptococcus pyogenes serotype M1 GN=M5005_Spy0992 PE=4 SV=1	230	7.32933e-51	37	235	232	97	98.7	0	0	None	ABC	Unknown
CBL50753.1	Q8Y5F0	3.A.1.134.12	gnl|BL_ORD_ID|15128 gnl|TC-DB|Q8Y5F0|3.A.1.134.12 Lmo2114 protein OS=Listeria monocytogenes serovar 1/2a (strain ATCC BAA-679 / EGD-e) GN=lmo2114 PE=4 SV=1	249	1.53175e-92	54	248	255	98.8	96.9	0	0	None	ABC	Beta-lactam antibiotics, Nisin, Gallidermin, Bacitracin
CBL51404.1	Q6MGV5	3.A.1.137.2	gnl|BL_ORD_ID|13198 gnl|TC-DB|Q6MGV5|3.A.1.137.2 ABC-type anti-microbial peptide transporter, ATP-binding protein OS=Bdellovibrio bacteriovorus (strain ATCC 15356 / DSM 50701 / NCIB 9529 / HD100) GN=Bd3816 PE=4 SV=1	227	1.01561e-77	50	233	237	97	95.4	0	1	None	ABC	Antimicrobial peptides
CBL50145.1	P77279	3.A.1.139.2	gnl|BL_ORD_ID|10103 gnl|TC-DB|P77279|3.A.1.139.2 Probable iron export ATP-binding protein FetA OS=Escherichia coli (strain K12) GN=fetA PE=1 SV=1	205	2.73393e-59	43	212	225	95.8	90.7	0	0	None	ABC	Fe2+
CBL50994.1	P55339	3.A.1.143.1	gnl|BL_ORD_ID|9633 gnl|TC-DB|P55339|3.A.1.143.1 ABC-type transporter ATP-binding protein EcsA OS=Bacillus subtilis (strain 168) GN=ecsA PE=1 SV=1	244	2.87693e-83	49	247	247	98.4	98	0	0	None	ABC	proteins
CBL49843.1	ANC59923	3.A.1.211.25	gnl|BL_ORD_ID|1278 gnl|TC-DB|ANC59923.1|3.A.1.211.25 OptrA [Enterococcus faecalis]	634	1.51263e-127	33	640	639	97.5	97.5	0	0	None	ABC	None
CBL50218.1	P50002	3.A.2.1.5	gnl|BL_ORD_ID|9431 gnl|TC-DB|P50002|3.A.2.1.5 ATP synthase subunit beta, sodium ion specific OS=Acetobacterium woodii (strain ATCC 29683 / DSM 1030 / JCM 2381 / KCTC 1655) GN=atpD PE=1 SV=3	461	0	70	479	466	96	98.3	0	0	None	F-ATPase	Na+
CBL50215.1	Q9RMB3	3.A.2.1.5	gnl|BL_ORD_ID|16758 gnl|TC-DB|Q9RMB3|3.A.2.1.5 ATP synthase subunit delta OS=Acetobacterium woodii GN=atpH PE=3 SV=1	172	7.09389e-30	33	182	180	93.4	94.4	0	0	None	F-ATPase	Na+
CBL50216.1	BAK19946	3.A.2.1.10	gnl|BL_ORD_ID|2056 gnl|TC-DB|BAK19946|3.A.2.1.10 ApH+ATPase alpha subunit [Aphanothece halophytica]	503	0	59	506	505	98.8	99.4	0	0	None	F-ATPase	protons, H+
CBL50217.1	BAK19947	3.A.2.1.10	gnl|BL_ORD_ID|2057 gnl|TC-DB|BAK19947|3.A.2.1.10 ApH+ATPase gamma subunit [Aphanothece halophytica]	341	4.00957e-52	33	320	317	98.8	99.1	0	0	None	F-ATPase	protons, H+
CBL50219.1	BAK19949	3.A.2.1.10	gnl|BL_ORD_ID|2059 gnl|TC-DB|BAK19949|3.A.2.1.10 ApH+ATPase epsilon subunit [Aphanothece halophytica]	135	1.60191e-17	30	146	138	91.8	94.2	0	0	None	F-ATPase	protons, H+
CBL50667.1	P37617	3.A.3.6.2	gnl|BL_ORD_ID|8796 gnl|TC-DB|P37617|3.A.3.6.2 LEAD, CADMIUM, ZINC AND MERCURY TRANSPORTING ATPASE (EC 3.6.3.3) (EC 3.6.3.5) - Escherichia coli.	62	3.66221e-09	40	76	732	80.3	8.1	0	7	None	P-ATPase	Pb2+, Cu2+, Ni2+, Hg2+, Co2+, Cd2+, Zn2+
CBL50749.1	P0AGD7	3.A.5.1.1	gnl|BL_ORD_ID|7644 gnl|TC-DB|P0AGD7|3.A.5.1.1 Signal recognition particle protein - Escherichia coli.	447	3.36764e-143	47	476	453	93.3	98.5	0	0	None	Sec	proteins
CBL50755.1	P10121	3.A.5.1.1	gnl|BL_ORD_ID|7749 gnl|TC-DB|P10121|3.A.5.1.1 CELL DIVISION PROTEIN FTSY - Escherichia coli.	395	6.98987e-87	41	413	497	95.2	77.5	0	0	None	Sec	proteins
CBL50129.1	Q6MR29	3.A.5.1.3	gnl|BL_ORD_ID|13260 gnl|TC-DB|Q6MR29|3.A.5.1.3 Protein translocase subunit SecA OS=Bdellovibrio bacteriovorus (strain ATCC 15356 / DSM 50701 / NCIB 9529 / HD100) GN=secA PE=3 SV=1	833	0	47	799	889	99.1	91.1	1	0	None	Sec	proteins
CBL50502.1	Q07711	3.A.7.7.1	gnl|BL_ORD_ID|10782 gnl|TC-DB|Q07711|3.A.7.7.1 DNA topoisomerase I (EC 5.99.1.2) (Omega-protein) (Relaxing enzyme) (Untwisting enzyme) (Swivelase) - Staphylococcus aureus.	646	7.46942e-37	24	703	700	86.8	82.9	0	0	None	IVSP	DNA
CBL51298.1	Q5EP68	3.A.7.11.1	gnl|BL_ORD_ID|12663 gnl|TC-DB|Q5EP68|3.A.7.11.1 ParA - Neisseria gonorrhoeae.	248	4.7471e-17	29	259	295	90.3	83.4	0	1	None	IVSP	DNA
CBL50292.1	Q6MDD6	3.A.7.16.1	gnl|BL_ORD_ID|13186 gnl|TC-DB|Q6MDD6|3.A.7.16.1 Putative exodeoxyribonuclease V OS=Protochlamydia amoebophila (strain UWE25) GN=recD PE=4 SV=1	733	2.79751e-120	34	789	721	90.4	97.2	0	0	None	IVSP	DNA
CBL49455.1	Q5G3M3	3.A.7.19.1	gnl|BL_ORD_ID|12694 gnl|TC-DB|Q5G3M3|3.A.7.19.1 Single-stranded DNA-binding protein OS=Enterococcus faecalis GN=pcfS PE=3 SV=1	173	6.6772e-53	52	172	150	99.4	99.3	0	0	None	IVSP	DNA
CBL49986.1	Q5G3L7	3.A.7.19.1	gnl|BL_ORD_ID|12689 gnl|TC-DB|Q5G3L7|3.A.7.19.1 PcfY OS=Enterococcus faecalis GN=pcfY PE=4 SV=1	191	1.55579e-19	30	195	206	95.4	89.8	0	0	None	IVSP	DNA
CBL50714.1	P38523	3.A.8.1.1	gnl|BL_ORD_ID|8881 gnl|TC-DB|P38523|3.A.8.1.1 GrpE protein homolog, mitochondrial precursor - Saccharomyces cerevisiae (Baker's yeast).	181	1.08019e-21	29	194	228	90.2	78.5	0	0	None	MPT	proteins
CBL49737.1	Q9FI56	3.A.9.1.2	gnl|BL_ORD_ID|15971 gnl|TC-DB|Q9FI56|3.A.9.1.2 Chaperone protein ClpC1, chloroplastic OS=Arabidopsis thaliana GN=CLPC1 PE=1 SV=1	817	0	46	826	929	97	86.2	0	0	None	CEPT or Tic-Toc	proteins
CBL50096.1	Q9FI56	3.A.9.1.2	gnl|BL_ORD_ID|15971 gnl|TC-DB|Q9FI56|3.A.9.1.2 Chaperone protein ClpC1, chloroplastic OS=Arabidopsis thaliana GN=CLPC1 PE=1 SV=1	672	0	50	730	929	88.6	71	0	0	None	CEPT or Tic-Toc	proteins
CBL51401.1	Q9SXJ7	3.A.9.1.2	gnl|BL_ORD_ID|16898 gnl|TC-DB|Q9SXJ7|3.A.9.1.2 Chaperone protein ClpC2, chloroplastic OS=Arabidopsis thaliana GN=CLPC2 PE=2 SV=1	665	0	45	708	952	88.4	69.2	0	0	None	CEPT or Tic-Toc	proteins
CBL50126.1	Q8CWM9	3.A.11.1.2	gnl|BL_ORD_ID|14227 gnl|TC-DB|Q8CWM9|3.A.11.1.2 Involved in transformation; required for DNA uptake but not for binding; Related to ATP-dependent RNA/DNA helicases - Streptococcus pneumoniae (strain ATCC BAA-255 / R6).	408	6.32818e-100	43	426	432	93.7	92.8	0	0	None	DNA-T	ssDNA
CBL49660.1	G2JTB4	3.A.11.1.4	gnl|BL_ORD_ID|4202 gnl|TC-DB|G2JTB4|3.A.11.1.4 ComE operon protein 2 OS=Listeria monocytogenes J0161 GN=LMOG_00216 PE=3 SV=1	145	1.90767e-54	49	159	186	90.6	77.4	0	0	None	DNA-T	ssDNA
CBL50127.1	G2JSZ8	3.A.11.1.4	gnl|BL_ORD_ID|4200 gnl|TC-DB|G2JSZ8|3.A.11.1.4 Competence protein ComFC OS=Listeria monocytogenes J0161 GN=LMOG_02351 PE=4 SV=1	217	4.26038e-22	31	231	218	93.5	93.6	0	0	None	DNA-T	ssDNA
CBL50765.1	AKM80112	3.A.11.1.5	gnl|BL_ORD_ID|1201 gnl|TC-DB|AKM80112|3.A.11.1.5 putative ATP-dependent DNA helicase [Candidatus Saccharibacteria bacterium GW2011_GWC2_44_17]	672	1.02702e-136	38	678	676	97.9	98.5	1	0	None	DNA-T	None
CBL50551.1	P08956	3.A.17.1.1	gnl|BL_ORD_ID|7302 gnl|TC-DB|P08956|3.A.17.1.1 Type I restriction enzyme EcoKI R protein (EC 3.1.21.3) (R.EcoKI) - Escherichia coli.	996	0	39	1072	1170	86.8	83.2	0	0	None	3.A.17	DNA
CBL49717.1	P38919	3.A.18.1.1	gnl|BL_ORD_ID|8907 gnl|TC-DB|P38919|3.A.18.1.1 Eukaryotic initiation factor 4A-III - Homo sapiens (Human).	356	2.19227e-92	41	494	411	71.7	86.1	0	0	None	3.A.18	mRNA
CBL50068.1	P38919	3.A.18.1.1	gnl|BL_ORD_ID|8907 gnl|TC-DB|P38919|3.A.18.1.1 Eukaryotic initiation factor 4A-III - Homo sapiens (Human).	336	1.14861e-32	26	411	411	80	81	0	0	None	3.A.18	mRNA
CBL50154.1	B3ET62	3.A.23.6.1	gnl|BL_ORD_ID|1640 gnl|TC-DB|B3ET62|3.A.23.6.1 Glyceraldehyde-3-phosphate dehydrogenase OS=Amoebophilus asiaticus (strain 5a2) GN=Aasi_1069 PE=3 SV=1	323	7.28144e-89	48	338	331	94.1	94	0	0	None	T6SS	None
CBL50650.1	B3ERW3	3.A.23.6.1	gnl|BL_ORD_ID|1638 gnl|TC-DB|B3ERW3|3.A.23.6.1 Uncharacterized protein OS=Amoebophilus asiaticus (strain 5a2) GN=Aasi_0564 PE=4 SV=1	214	5.78495e-76	52	319	314	66.8	67.8	1	0	None	T6SS	None
CBL50363.1	B3ERD7	3.A.23.6.1	gnl|BL_ORD_ID|1633 gnl|TC-DB|B3ERD7|3.A.23.6.1 Transposase IS4 family protein OS=Amoebophilus asiaticus (strain 5a2) GN=Aasi_0128 PE=4 SV=1	88	2.36514e-09	38	162	274	51.9	31.4	0	1	None	T6SS	None
CBL50143.1	O97252	3.A.26.1.1	gnl|BL_ORD_ID|6740 gnl|TC-DB|O97252|3.A.26.1.1 ATP-dependent Clp protease proteolytic subunit OS=Plasmodium falciparum (isolate 3D7) GN=PF3D7_0307400 PE=1 SV=1	175	6.28023e-54	51	194	370	89.7	46.8	1	0	None	PTEX	proteins
CBL51018.1	O06924	3.B.1.1.4	gnl|BL_ORD_ID|5802 gnl|TC-DB|O06924|3.B.1.1.4 ACETYL-S-ACYL CARRIER PROTEIN - Malonomonas rubra.	554	0	55	547	554	99.6	99.8	0	0	None	NaT-DC	Na+
CBL51017.1	O06925	3.B.1.1.4	gnl|BL_ORD_ID|5803 gnl|TC-DB|O06925|3.B.1.1.4 ACYL CARRIER PROTEIN - Malonomonas rubra.	102	6.61264e-10	33	99	112	96	89.3	0	0	None	NaT-DC	Na+
CBL50763.1	O80800	3.D.1.6.3	gnl|BL_ORD_ID|6551 gnl|TC-DB|O80800|3.D.1.6.3 Acyl carrier protein - Arabidopsis thaliana (Mouse-ear cress).	78	1.78899e-18	42	80	126	96.2	61.1	0	0	None	NDH	H+
CBL50591.1	F4K2G0	3.D.1.8.1	gnl|BL_ORD_ID|3840 gnl|TC-DB|F4K2G0|3.D.1.8.1 Peptidyl-prolyl cis-trans isomerase OS=Arabidopsis thaliana GN=CYP20-2 PE=3 SV=1	169	8.15415e-39	47	199	255	82.4	55.3	0	0	None	NDH	H+
CBL49915.1	C0H3V2	4.A.2.1.5	gnl|BL_ORD_ID|2084 gnl|TC-DB|C0H3V2|4.A.2.1.5 Mannitol-specific phosphotransferase enzyme IIA component OS=Bacillus subtilis (strain 168) OX=224308 GN=mtlF PE=1 SV=1	139	8.69988e-44	50	150	143	92	93	0	0	None	Fru	mannitol
CBL50875.1	P46318	4.A.3.2.2	gnl|BL_ORD_ID|9293 gnl|TC-DB|P46318|4.A.3.2.2 PTS SYSTEM, CELLOBIOSE-SPECIFIC IIB COMPONENT (EIIB-CEL) (CELLOBIOSE- PERMEASE IIB COMPONENT) (PHOSPHOTRANSFERASE ENZYME II, B COMPONENT) (EC 2.7.1.69) - Bacillus subtilis.	99	1.08072e-16	36	114	102	86	92.2	0	0	None	Lac	Lichenan oligosaccharides
CBL50337.1	Q9CIF0	4.A.3.2.4	gnl|BL_ORD_ID|15853 gnl|TC-DB|Q9CIF0|4.A.3.2.4 Cellobiose-specific PTS system IIB component - Lactococcus lactis subsp. lactis (Streptococcus lactis).	112	2.28728e-29	51	112	108	96.4	98.1	0	0	None	Lac	Cellobiose
CBL50876.1	C4X746	4.A.3.2.7	gnl|BL_ORD_ID|2318 gnl|TC-DB|C4X746|4.A.3.2.7 PEP-dependent phosphotransferase enzyme III OS=Klebsiella pneumoniae subsp. pneumoniae NTUH-K2044 GN=celC PE=4 SV=1	102	4.97206e-21	40	107	115	94.4	86.1	0	1	None	Lac	N,N'-diacetylchitobiose
CBL50338.1	Q72XQ1	4.A.3.2.8	gnl|BL_ORD_ID|13513 gnl|TC-DB|Q72XQ1|4.A.3.2.8 PTS system, cellobiose-specific IIA component OS=Bacillus cereus (strain ATCC 10987) GN=celC PE=4 SV=1	94	1.80401e-28	53	123	105	75.6	88.6	0	0	None	Lac	N-, N'-diacetylchitobiose
CBL50111.1	O32334	4.A.4.1.2	gnl|BL_ORD_ID|6110 gnl|TC-DB|O32334|4.A.4.1.2 GutB OS=Clostridium beijerinckii GN=gutB PE=4 SV=1	107	2.86813e-06	31	126	122	81.7	77.9	0	0	None	Gut	glucitol
CBL51156.1	Q82ZC8	4.A.6.1.8	gnl|BL_ORD_ID|13995 gnl|TC-DB|Q82ZC8|4.A.6.1.8 PTS system, IIA component OS=Enterococcus faecalis GN=EF_3136 PE=1 SV=1	129	3.84557e-13	29	132	150	90.2	84	0	0	None	Man	Gluconate
CBL50883.1	B3W757	4.A.6.1.18	gnl|BL_ORD_ID|1697 gnl|TC-DB|B3W757|4.A.6.1.18 Phosphotransferase system sugar-specific EII component OS=Lactobacillus casei (strain BL23) GN=PTS-EII PE=4 SV=1	126	1.4455e-37	46	126	126	99.2	98.4	1	0	None	Man	Galacto-N-biose, Lacto-N-biose, N-acetyl galactosamine
CBL50886.1	V7IFY8	4.A.6.1.19	gnl|BL_ORD_ID|18083 gnl|TC-DB|V7IFY8|4.A.6.1.19 PTS system sorbose subfamily IIB component OS=Salmonella enterica subsp. enterica serovar Cubana str. 76814 GN=A628_05229 PE=4 SV=1	153	3.15214e-42	44	154	153	98.7	98.7	0	0	None	Man	Glucoselysine, Fructoselysine
CBL51414.1	Q42524	4.C.1.1.7	gnl|BL_ORD_ID|11971 gnl|TC-DB|Q42524|4.C.1.1.7 4-coumarate--CoA ligase 1 - Arabidopsis thaliana (Mouse-ear cress).	512	8.64231e-11	23	504	561	92.7	86.5	0	1	None	FAT	fatty acids
CBL51207.1	P39851	8.A.3.2.1	gnl|BL_ORD_ID|8998 gnl|TC-DB|P39851|8.A.3.2.1 CAPB protein - Staphylococcus aureus.	213	5.99627e-53	40	261	228	80.8	91.7	0	0	None	MPA1-C or MPA1+C	NONE
CBL49492.1	P80874	8.A.5.1.4	gnl|BL_ORD_ID|10186 gnl|TC-DB|P80874|8.A.5.1.4 General stress protein 69 OS=Bacillus subtilis (strain 168) GN=yhdN PE=1 SV=2	322	5.54213e-27	28	285	331	94.4	93.1	0	0	None	KTN	NONE
CBL50019.1	P76187	8.A.5.1.7	gnl|BL_ORD_ID|10053 gnl|TC-DB|P76187|8.A.5.1.7 Oxidoreductase YdhF OS=Escherichia coli (strain K12) GN=ydhF PE=1 SV=2	278	3.25353e-44	35	306	298	87.9	86.2	0	0	None	KTN	NONE
CBL50099.1	P08839	8.A.7.1.1	gnl|BL_ORD_ID|7300 gnl|TC-DB|P08839|8.A.7.1.1 PHOSPHOENOLPYRUVATE-PROTEIN PHOSPHOTRANSFERASE (EC 2.7.3.9) (PHOSPHOTRANSFERASE SYSTEM, ENZYME I) - Escherichia coli.	572	6.11185e-180	48	577	575	98.6	99	0	0	None	EI	NONE
CBL51071.1	C0SP99	9.B.10.1.1	gnl|BL_ORD_ID|2122 gnl|TC-DB|C0SP99|9.B.10.1.1 9.B.10.1.1 Putative L,D-transpeptidase YciB	146	5.25968e-34	42	155	194	93.5	72.7	0	1	None	9.B.10	Zn2+
CBL50221.1	Q01465	9.B.157.1.1	gnl|BL_ORD_ID|10509 gnl|TC-DB|Q01465|9.B.157.1.1 Rod shape-determining protein MreB OS=Bacillus subtilis (strain 168) GN=mreB PE=3 SV=3	324	2.69443e-126	54	329	337	97.6	95.8	0	1	None	MreBCD	Folic acid
CBL50018.1	Q83XH1	9.B.325.1.1	gnl|BL_ORD_ID|14016 gnl|TC-DB|Q83XH1|9.B.325.1.1 ABC transporter - Clostridium hathewayi.	532	0	58	540	546	98.3	96.5	0	0	None	ABC4	None

## Sheet: Gasseri
Query ID	Hit ID	Hit TCID	Hit Description	Match Len	e-Val	% Identity	Query Length	Hit Length	Query Coverage	Hit Coverage	Query TMS#	Hit TMS#	TM-Overlap Score	Family Abrv.	Predicted Substrate	#
ABJ59768.1	Q8Y5K1	1.A.1.17.2	gnl|BL_ORD_ID|15129 gnl|TC-DB|Q8Y5K1|1.A.1.17.2 Lmo2059 protein OS=Listeria monocytogenes GN=lmo2059 PE=4 SV=1	264	9.61115e-20	25	292	247	89	96.8	6	6	3.35	VIC	K+	1
ABJ59878.1	D7VEY8	1.A.8.2.7	gnl|BL_ORD_ID|3106 gnl|TC-DB|D7VEY8|1.A.8.2.7 MIP family glycerol uptake facilitator protein GlpF OS=Lactobacillus plantarum subsp. plantarum ATCC 14917 GN=glpF4 PE=3 SV=1	250	9.72199e-127	67	289	250	86.2	99.2	7	6	5.65	MIP	water, Dihydroxyacetone, glycerol	2
ABJ60370.1	A3CPR5	1.A.14.2.6	gnl|BL_ORD_ID|391 gnl|TC-DB|A3CPR5|1.A.14.2.6 Integral membrane protein, possible receptor, putative OS=Streptococcus sanguinis (strain SK36) GN=SSA_1788 PE=4 SV=1	220	1.51105e-42	33	244	227	89.8	96	7	7	5.45	CaTA	Unknown	3
ABJ60858.1	A3CPR5	1.A.14.2.6	gnl|BL_ORD_ID|391 gnl|TC-DB|A3CPR5|1.A.14.2.6 Integral membrane protein, possible receptor, putative OS=Streptococcus sanguinis (strain SK36) GN=SSA_1788 PE=4 SV=1	220	2.00771e-39	32	243	227	90.1	96	7	7	6.5	CaTA	Unknown	4
ABJ60949.1	P94585	1.A.22.1.3	gnl|BL_ORD_ID|10317 gnl|TC-DB|P94585|1.A.22.1.3 Large-conductance mechanosensitive channel - Bacillus subtilis.	128	6.73892e-39	50	125	130	99.2	96.9	2	2	1.9	MscL	ions, Osmolytes	5
ABJ59837.1	O34897	1.A.23.3.1	gnl|BL_ORD_ID|6159 gnl|TC-DB|O34897|1.A.23.3.1 YKUT PROTEIN - Bacillus subtilis.	257	7.90749e-37	33	298	267	80.5	91.4	2	2	1.5	MscS	Osmolytes	6
ABJ60647.1	O07591	1.A.43.1.2	gnl|BL_ORD_ID|5835 gnl|TC-DB|O07591|1.A.43.1.2 Protein CrcB homolog 2 OS=Bacillus subtilis (strain 168) GN=crcB2 PE=3 SV=1	120	4.72067e-13	37	129	131	88.4	88.5	4	4	3.2	Fluc	Camphor, Fl-	8
ABJ60646.1	F6CB17	1.A.43.1.14	gnl|BL_ORD_ID|3899 gnl|TC-DB|F6CB17|1.A.43.1.14 Putative fluoride ion transporter CrcB OS=Lactobacillus kefiranofaciens (strain ZW3) GN=crcB PE=3 SV=1	119	1.81667e-43	58	120	124	93.3	95.2	4	4	3	Fluc	Fl-	9
ABJ59962.1	T1Y8N2	1.A.112.2.10	gnl|BL_ORD_ID|17867 gnl|TC-DB|T1Y8N2|1.A.112.2.10 Magnesium and cobalt efflux protein corC OS=Staphylococcus aureus subsp. aureus CN1 OX=1193576 GN=SAKOR_00699 PE=4 SV=1	458	1.16568e-78	33	459	449	99.3	99.8	4	4	3.15	CNNM	None	11
ABJ60808.1	E3DLQ2	1.C.105.2.9	gnl|BL_ORD_ID|3309 gnl|TC-DB|E3DLQ2|1.C.105.2.9 Putative uncharacterized protein OS=Halanaerobium praevalens (strain ATCC 33744 / DSM 2228 / GSL) GN=Hprae_1098 PE=4 SV=1	870	3.74551e-28	23	812	872	98.6	96.4	2	2	0.65	Vip3	small molecules	16
ABJ60298.1	P54176	1.C.113.1.1	gnl|BL_ORD_ID|9577 gnl|TC-DB|P54176|1.C.113.1.1 HEMOLYSIN III (HLY-III) - Bacillus cereus.	206	8.51947e-67	48	221	219	92.8	93.6	7	7	6.35	Hly III	small molecules	17
ABJ60025.1	D0R3Q7	1.E.26.9.1	gnl|BL_ORD_ID|2648 gnl|TC-DB|D0R3Q7|1.E.26.9.1 Holin OS=Lactobacillus johnsonii (strain FI9785) GN=ps145 PE=4 SV=1	96	1.1853e-09	34	143	114	66.4	83.3	1	1	0.9	Holin LLH	endolysin	19
ABJ60086.1	D0R3Q7	1.E.26.9.1	gnl|BL_ORD_ID|2648 gnl|TC-DB|D0R3Q7|1.E.26.9.1 Holin OS=Lactobacillus johnsonii (strain FI9785) GN=ps145 PE=4 SV=1	96	1.1853e-09	34	143	114	66.4	83.3	1	1	0.9	Holin LLH	endolysin	20
ABJ59448.1	J8Z3M3	1.E.43.1.9	gnl|BL_ORD_ID|4942 gnl|TC-DB|J8Z3M3|1.E.43.1.9 Uncharacterized protein OS=Bacillus cereus HD73 PE=4 SV=1	75	2.92885e-21	51	88	82	84.1	90.2	3	3	2.4	T-A Hol	endolysin	21
ABJ61158.1	Q46909	2.A.1.1.95	gnl|BL_ORD_ID|12074 gnl|TC-DB|Q46909|2.A.1.1.95 Inner membrane metabolite transport protein ygcS OS=Escherichia coli (strain K12) GN=ygcS PE=1 SV=2	421	1.13492e-64	29	447	445	93.3	92.6	12	12	10.6	MFS	Metabolites	25
ABJ59907.1	P25744	2.A.1.2.20	gnl|BL_ORD_ID|8291 gnl|TC-DB|P25744|2.A.1.2.20 Hypothetical transport protein yceE - Escherichia coli.	395	9.36675e-131	49	403	408	97.5	96.1	12	12	10.25	MFS	fosfomycin, Fluoroquinolones	26
ABJ61061.1	P25744	2.A.1.2.20	gnl|BL_ORD_ID|8291 gnl|TC-DB|P25744|2.A.1.2.20 Hypothetical transport protein yceE - Escherichia coli.	382	1.62404e-113	43	404	408	94.3	93.4	12	12	10.35	MFS	fosfomycin, Fluoroquinolones	27
ABJ61088.1	O34546	2.A.1.2.69	gnl|BL_ORD_ID|6138 gnl|TC-DB|O34546|2.A.1.2.69 Uncharacterized MFS-type transporter yttB OS=Bacillus subtilis (strain 168) GN=yttB PE=3 SV=1	381	1.99651e-86	36	416	397	89.9	93.5	12	12	11.1	MFS	Unknown, NONE	28
ABJ59556.1	O34546	2.A.1.2.69	gnl|BL_ORD_ID|6138 gnl|TC-DB|O34546|2.A.1.2.69 Uncharacterized MFS-type transporter yttB OS=Bacillus subtilis (strain 168) GN=yttB PE=3 SV=1	359	2.49704e-61	33	438	397	80.6	87.9	13	12	10.55	MFS	Unknown, NONE	29
ABJ60784.1	O35018	2.A.1.3.30	gnl|BL_ORD_ID|6173 gnl|TC-DB|O35018|2.A.1.3.30 Lincomycin resistance protein lmrB - Bacillus subtilis.	463	7.37291e-94	36	464	479	96.8	96.5	14	14	12.05	MFS	None	30
ABJ59855.1	O32182	2.A.1.3.33	gnl|BL_ORD_ID|6098 gnl|TC-DB|O32182|2.A.1.3.33 Uncharacterized MFS-type transporter yusP OS=Bacillus subtilis GN=yusP PE=3 SV=1	517	1.3962e-86	31	487	541	99.6	95.4	14	14	10.85	MFS	Novobiocin, Streptomycin, Actinomycin D	31
ABJ59880.1	P96712	2.A.1.3.50	gnl|BL_ORD_ID|10349 gnl|TC-DB|P96712|2.A.1.3.50 Multidrug resistance protein 3 OS=Bacillus subtilis (strain 168) GN=bmr3 PE=1 SV=1	441	4.53824e-67	30	497	512	87.5	83	14	14	10.05	MFS	drugs	32
ABJ59879.1	P96712	2.A.1.3.50	gnl|BL_ORD_ID|10349 gnl|TC-DB|P96712|2.A.1.3.50 Multidrug resistance protein 3 OS=Bacillus subtilis (strain 168) GN=bmr3 PE=1 SV=1	485	7.81486e-67	29	492	512	94.7	93.6	14	14	11.3	MFS	drugs	33
ABJ60116.1	I7QYF9	2.A.1.3.75	gnl|BL_ORD_ID|4875 gnl|TC-DB|I7QYF9|2.A.1.3.75 Major facilitator superfamily protein OS=Streptococcus canis FSL Z3-227 GN=SCAZ3_10115 PE=3 SV=1	483	4.48027e-156	48	490	499	96.1	96.6	14	14	9.35	MFS	None	34
ABJ59756.1	Q9I0P8	2.A.1.11.8	gnl|BL_ORD_ID|16192 gnl|TC-DB|Q9I0P8|2.A.1.11.8 Uncharacterized protein OS=Pseudomonas aeruginosa (strain ATCC 15692 / PAO1 / 1C / PRS 101 / LMG 12228) GN=PA2589 PE=4 SV=1	389	6.13299e-34	28	415	404	92.3	94.3	12	12	10.45	MFS	Unknown	35
ABJ60353.1	Q7BKK4	2.A.1.21.22	gnl|BL_ORD_ID|13663 gnl|TC-DB|Q7BKK4|2.A.1.21.22 Macrolide efflux protein E OS=Streptococcus pneumoniae GN=mefE PE=4 SV=1	407	2.66333e-57	30	410	405	98.5	98.3	12	12	9.8	MFS	erythromycin, LL-37	36
ABJ59470.1	P97039	2.A.1.23.2	gnl|BL_ORD_ID|10357 gnl|TC-DB|P97039|2.A.1.23.2 Putative bile salt transporter - Lactobacillus johnsonii.	451	0	94	451	451	99.8	99.8	12	12	12.4	MFS	Cholate, taurocholate	37
ABJ60740.1	C2UR80	2.A.1.46.5	gnl|BL_ORD_ID|2190 gnl|TC-DB|C2UR80|2.A.1.46.5 Quinolone resistence protein, major facilitator family transporter OS=Bacillus cereus Rock3-28 GN=bcere0019_7170 PE=4 SV=1	383	5.80329e-36	24	389	407	97.2	93.6	12	12	11.45	MFS	Quinolone	38
ABJ60125.1	Q04DP6	2.A.1.68.1	gnl|BL_ORD_ID|10684 gnl|TC-DB|Q04DP6|2.A.1.68.1 Permease of the major facilitator superfamily OS=Oenococcus oeni (strain BAA-331 / PSU-1) GN=OEOE_1574 PE=4 SV=1	390	3.3542e-108	42	401	403	94.5	96	12	12	11.4	MFS	glucose	41
ABJ61077.1	P27837	2.A.3.1.15	gnl|BL_ORD_ID|8347 gnl|TC-DB|P27837|2.A.3.1.15 Probable transport protein YifK OS=Escherichia coli (strain K12) GN=yifK PE=1 SV=4	452	6.85705e-167	52	463	461	96.8	96.3	12	12	10.25	APC	Unknown	43
ABJ61078.1	P27837	2.A.3.1.15	gnl|BL_ORD_ID|8347 gnl|TC-DB|P27837|2.A.3.1.15 Probable transport protein YifK OS=Escherichia coli (strain K12) GN=yifK PE=1 SV=4	454	1.37774e-166	52	463	461	97	97.4	12	12	10.7	APC	Unknown	44
ABJ59515.1	P96704	2.A.3.1.16	gnl|BL_ORD_ID|10347 gnl|TC-DB|P96704|2.A.3.1.16 Uncharacterized transporter YdgF OS=Bacillus subtilis (strain 168) GN=ydgF PE=3 SV=1	450	2.9951e-171	52	449	458	99.6	98	12	12	11	APC	Unknown	45
ABJ61071.1	Q8R706	2.A.3.3.22	gnl|BL_ORD_ID|14809 gnl|TC-DB|Q8R706|2.A.3.3.22 Amino acid transporters OS=Caldanaerobacter subterraneus subsp. tengcongensis (strain DSM 15242 / JCM 11007 / NBRC 100824 / MB4) GN=PotE6 PE=4 SV=1	463	7.42769e-128	42	462	475	98.3	97.1	12	13	8.55	APC	Amino acids	46
ABJ60256.1	Q8R706	2.A.3.3.22	gnl|BL_ORD_ID|14809 gnl|TC-DB|Q8R706|2.A.3.3.22 Amino acid transporters OS=Caldanaerobacter subterraneus subsp. tengcongensis (strain DSM 15242 / JCM 11007 / NBRC 100824 / MB4) GN=PotE6 PE=4 SV=1	461	8.55221e-27	24	450	475	96.9	92.4	12	13	7.4	APC	Amino acids	47
ABJ61083.1	s6ex81	2.A.3.3.23	gnl|BL_ORD_ID|17737 gnl|TC-DB|s6ex81|2.A.3.3.23 Branched-chain amino acid permease OS=Lactococcus lactis subsp. lactis A12 GN=bcaP PE=4 SV=1	467	4.63683e-131	44	465	469	98.5	98.3	12	12	10.65	APC	Leucine, Isoleucine, Valine	48
ABJ59462.1	O30417	2.A.3.7.1	gnl|BL_ORD_ID|6025 gnl|TC-DB|O30417|2.A.3.7.1 AMINO ACID ANTIPORTER GADC (ORFX) - Lactococcus lactis (subsp. lactis) (Streptococcus lactis).	459	1.90366e-106	36	494	503	92.5	90.9	11	12	10.85	APC	Gamma-aminobutyrate, glutamate	49
ABJ60673.1	P75835	2.A.3.7.2	gnl|BL_ORD_ID|10025 gnl|TC-DB|P75835|2.A.3.7.2 Inner membrane transporter ycaM OS=Escherichia coli (strain K12) GN=ycaM PE=1 SV=2	471	7.11915e-143	45	516	476	89.5	97.5	13	12	10.85	APC	glutamate, Gamma-aminobutyric acid	50
ABJ60983.1	P75835	2.A.3.7.2	gnl|BL_ORD_ID|10025 gnl|TC-DB|P75835|2.A.3.7.2 Inner membrane transporter ycaM OS=Escherichia coli (strain K12) GN=ycaM PE=1 SV=2	472	1.31407e-122	38	480	476	97.7	98.7	12	12	10.7	APC	glutamate, Gamma-aminobutyric acid	51
ABJ61154.1	P75835	2.A.3.7.2	gnl|BL_ORD_ID|10025 gnl|TC-DB|P75835|2.A.3.7.2 Inner membrane transporter ycaM OS=Escherichia coli (strain K12) GN=ycaM PE=1 SV=2	464	6.3361e-118	38	492	476	93.7	97.1	12	12	10.75	APC	glutamate, Gamma-aminobutyric acid	52
ABJ60219.1	P39282	2.A.3.7.5	gnl|BL_ORD_ID|8937 gnl|TC-DB|P39282|2.A.3.7.5 Inner membrane transporter yjeM OS=Escherichia coli (strain K12) GN=yjeM PE=1 SV=2	487	5.99395e-144	43	502	500	96.4	96.6	12	12	10.95	APC	Unknown	53
ABJ59964.1	O34739	2.A.3.8.12	gnl|BL_ORD_ID|6148 gnl|TC-DB|O34739|2.A.3.8.12 YkbA protein - Bacillus subtilis.	437	5.51547e-107	39	452	438	95.1	97.3	12	12	10.85	APC	Serine, Threonine, tyrosine, tryptophan, phenylalanine, Histidine	55
ABJ59670.1	O07002	2.A.3.11.1	gnl|BL_ORD_ID|5816 gnl|TC-DB|O07002|2.A.3.11.1 Hypothetical protein yvea - Bacillus subtilis.	479	6.9713e-90	34	491	520	96.1	89.6	13	14	9.25	APC	aspartate, glutamate, L-aspartate hydroxamate	56
ABJ59735.1	O07084	2.A.4.1.3	gnl|BL_ORD_ID|5820 gnl|TC-DB|O07084|2.A.4.1.3 Cation transport protein YRDO - Bacillus subtilis.	261	2.12991e-59	39	294	311	87.4	83.6	5	5	4.8	CDF	Cd2+, Zn2+, H+, K+	57
ABJ60735.1	Q6MMK1	2.A.6.6.11	gnl|BL_ORD_ID|13241 gnl|TC-DB|Q6MMK1|2.A.6.6.11 3-hydroxy-3-methylglutaryl coenzyme A reductase OS=Bdellovibrio bacteriovorus (strain ATCC 15356 / DSM 50701 / NCIB 9529 / HD100) GN=Bd1627 PE=3 SV=1	423	7.91685e-74	38	429	438	92.8	94.5	2	1	0	RND	Electrons	59
ABJ60959.1	KRN20350	2.A.7.3.79	gnl|BL_ORD_ID|5289 gnl|TC-DB|KRN20350.1|2.A.7.3.79 DMT family permease [Lactobacillus similis DSM 23365 = JCM 2765]	285	2.05152e-73	42	309	313	90.9	89.8	10	10	9.15	DMT	None	60
ABJ61072.1	KRN20350	2.A.7.3.79	gnl|BL_ORD_ID|5289 gnl|TC-DB|KRN20350.1|2.A.7.3.79 DMT family permease [Lactobacillus similis DSM 23365 = JCM 2765]	283	7.88785e-70	42	297	313	94.3	89.5	10	10	9.35	DMT	None	61
ABJ60415.1	Q9X4M3	2.A.7.5.2	gnl|BL_ORD_ID|17220 gnl|TC-DB|Q9X4M3|2.A.7.5.2 PUTATIVE RIBOSE TRANSPORTER RBSU - Lactobacillus sakei.	296	1.10587e-111	52	296	294	99.7	99.3	10	10	9	DMT	Ribose	62
ABJ59584.1	Q9X4M3	2.A.7.5.2	gnl|BL_ORD_ID|17220 gnl|TC-DB|Q9X4M3|2.A.7.5.2 PUTATIVE RIBOSE TRANSPORTER RBSU - Lactobacillus sakei.	283	1.46844e-56	36	287	294	96.2	94.9	10	10	8.55	DMT	Ribose	63
ABJ61170.1	Q01625	2.A.9.3.2	gnl|BL_ORD_ID|10517 gnl|TC-DB|Q01625|2.A.9.3.2 Stage III sporulation protein J precursor - Bacillus subtilis.	258	6.04946e-69	39	291	261	88.3	95.8	6	6	4.7	YidC/Alb3/Oxa1	proteins	64
ABJ59919.1	Q5M4H8	2.A.17.1.6	gnl|BL_ORD_ID|12763 gnl|TC-DB|Q5M4H8|2.A.17.1.6 Di-or tripeptide:H+ symporter OS=Streptococcus thermophilus (strain ATCC BAA-250 / LMG 18311) GN=dtpT PE=3 SV=1	491	0	58	498	483	98.2	98.8	13	14	8.65	POT/PTR	dipeptides, tripeptides	67
ABJ60952.1	P54596	2.A.23.1.4	gnl|BL_ORD_ID|9598 gnl|TC-DB|P54596|2.A.23.1.4 Hypothetical symporter yhcL - Bacillus subtilis.	461	7.61066e-156	50	480	463	95	98.9	12	11	9.95	DAACS	Selenocystine, Cystine, H+	68
ABJ59465.1	F2HK99	2.A.26.1.9	gnl|BL_ORD_ID|3747 gnl|TC-DB|F2HK99|2.A.26.1.9 BrnQ protein OS=Lactococcus lactis subsp. lactis (strain CV56) GN=brnQ PE=4 SV=1	438	1.67676e-130	45	454	456	96.3	95.8	12	12	11.05	LIVCS	Branched amino acids	69
ABJ60336.1	F2HK99	2.A.26.1.9	gnl|BL_ORD_ID|3747 gnl|TC-DB|F2HK99|2.A.26.1.9 BrnQ protein OS=Lactococcus lactis subsp. lactis (strain CV56) GN=brnQ PE=4 SV=1	448	3.57116e-127	43	475	456	93.1	98	12	12	10.6	LIVCS	Branched amino acids	70
ABJ60852.1	Q838N7	2.A.35.1.3	gnl|BL_ORD_ID|14005 gnl|TC-DB|Q838N7|2.A.35.1.3 Na+/H+ antiporter - Enterococcus faecalis (Streptococcus faecalis).	451	6.44096e-180	55	458	467	98	96.4	12	13	10.1	NhaC	tyrosine	71
ABJ61102.1	P26235	2.A.37.2.1	gnl|BL_ORD_ID|8304 gnl|TC-DB|P26235|2.A.37.2.1 NA(+)/H(+) ANTIPORTER - Enterococcus hirae.	387	1.07247e-121	49	386	383	99.5	99.7	13	13	10.8	CPA2	Na+, H+	73
ABJ59888.1	Q9CF78	2.A.40.1.2	gnl|BL_ORD_ID|15850 gnl|TC-DB|Q9CF78|2.A.40.1.2 Uracil permease - Lactococcus lactis (subsp. lactis) (Streptococcus lactis).	426	6.70843e-179	59	443	430	93	98.4	12	13	8.45	NAT/NCS2	Uracil	75
ABJ59637.1	P42086	2.A.40.3.1	gnl|BL_ORD_ID|9118 gnl|TC-DB|P42086|2.A.40.3.1 XANTHINE PERMEASE - Bacillus subtilis.	433	3.59369e-153	51	442	438	97.3	98.4	12	13	9.75	NAT/NCS2	Xanthine	76
ABJ61139.1	O34987	2.A.40.7.2	gnl|BL_ORD_ID|6167 gnl|TC-DB|O34987|2.A.40.7.2 Hypoxanthine/guanine permease (Hypothetical protein) - Bacillus subtilis.	435	4.68105e-165	54	436	440	97.5	98.6	12	12	7.9	NAT/NCS2	Hypoxanthine, Guanosine	77
ABJ61141.1	O34987	2.A.40.7.2	gnl|BL_ORD_ID|6167 gnl|TC-DB|O34987|2.A.40.7.2 Hypoxanthine/guanine permease (Hypothetical protein) - Bacillus subtilis.	436	7.1105e-162	52	455	440	93.6	98.9	12	12	7.8	NAT/NCS2	Hypoxanthine, Guanosine	78
ABJ61143.1	O34987	2.A.40.7.2	gnl|BL_ORD_ID|6167 gnl|TC-DB|O34987|2.A.40.7.2 Hypoxanthine/guanine permease (Hypothetical protein) - Bacillus subtilis.	434	3.10923e-156	51	438	440	96.8	98.2	12	12	7.9	NAT/NCS2	Hypoxanthine, Guanosine	79
ABJ59904.1	Q6D017	2.A.47.3.4	gnl|BL_ORD_ID|13078 gnl|TC-DB|Q6D017|2.A.47.3.4 Putative sodium:sulfate symporter - Erwinia carotovora subsp. atroseptica (Pectobacterium atrosepticum).	478	6.38948e-125	37	479	484	97.3	98.1	15	12	9.55	DASS	Citrate	81
ABJ59791.1	A8ALD3	2.A.49.5.5	gnl|BL_ORD_ID|823 gnl|TC-DB|A8ALD3|2.A.49.5.5 H(+)/Cl(-) exchange transporter ClcA OS=Citrobacter koseri (strain ATCC BAA-895 / CDC 4225-83 / SGSC4696) GN=clcA PE=3 SV=1	444	1.28692e-48	28	457	473	91.2	87.3	11	11	9.8	ClC	H+, Cl-	83
ABJ61092.1	P39580	2.A.50.2.1	gnl|BL_ORD_ID|8965 gnl|TC-DB|P39580|2.A.50.2.1 Protein dltB - Bacillus subtilis.	398	4.48619e-124	49	407	395	96.1	97.5	10	12	7.1	GUP	Alanine	84
ABJ60512.1	Q8KUK6	2.A.66.2.16	gnl|BL_ORD_ID|14593 gnl|TC-DB|Q8KUK6|2.A.66.2.16 CpsU OS=Streptococcus thermophilus GN=cpsU PE=4 SV=1	466	5.23982e-167	51	475	471	97.9	98.7	14	14	11.4	MOP	Capsular polysaccharides	86
ABJ60876.1	Q8KUK6	2.A.66.2.16	gnl|BL_ORD_ID|14593 gnl|TC-DB|Q8KUK6|2.A.66.2.16 CpsU OS=Streptococcus thermophilus GN=cpsU PE=4 SV=1	461	3.92931e-77	31	478	471	94.8	96.4	14	14	11.75	MOP	Capsular polysaccharides	87
ABJ59876.1	E0SFK1	2.A.69.3.2	gnl|BL_ORD_ID|3202 gnl|TC-DB|E0SFK1|2.A.69.3.2 Transporter OS=Dickeya dadantii (strain 3937) GN=Dda3937_03046 PE=4 SV=1	305	1.32026e-18	22	313	318	93.6	92.8	10	10	8.1	AEC	malate	89
ABJ59565.1	Q9CHU5	2.A.72.1.3	gnl|BL_ORD_ID|15851 gnl|TC-DB|Q9CHU5|2.A.72.1.3 Probable potassium transport system protein kup 1 OS=Lactococcus lactis subsp. lactis (strain IL1403) GN=kup1 PE=3 SV=1	653	0	53	682	670	95.5	96.6	13	11	9.9	KUP	K+	91
ABJ60239.1	G7U9U2	2.A.79.1.3	gnl|BL_ORD_ID|4354 gnl|TC-DB|G7U9U2|2.A.79.1.3 Putative uncharacterized protein OS=Propionibacterium acnes ATCC 11828 GN=TIIST44_11145 PE=4 SV=1	402	3.33697e-60	33	458	440	86.7	89.1	9	10	7.2	ThrE	Threonine	92
ABJ60998.1	Q73PT4	2.A.79.1.5	gnl|BL_ORD_ID|13535 gnl|TC-DB|Q73PT4|2.A.79.1.5 Membrane protein, putative OS=Treponema denticola (strain ATCC 35405 / CIP 103919 / DSM 14222) GN=TDE_0712 PE=4 SV=1	263	1.68532e-37	33	260	260	99.2	99.6	6	5	4.15	ThrE	Glycine, Alanine	93
ABJ60997.1	W4C0M8	2.A.79.1.7	gnl|BL_ORD_ID|18155 gnl|TC-DB|W4C0M8|2.A.79.1.7 Uncharacterized protein OS=Paenibacillus sp. FSL H8-237 GN=C171_23415 PE=4 SV=1	136	8.9165e-27	35	156	142	86.5	94.4	5	5	4	ThrE	Unknown	94
ABJ60709.1	O32095	2.A.86.1.8	gnl|BL_ORD_ID|6089 gnl|TC-DB|O32095|2.A.86.1.8 UPF0118 membrane protein yueF OS=Bacillus subtilis GN=yueF PE=3 SV=1	344	7.63192e-72	35	393	369	87.3	92.4	8	8	8.3	2.A.86	Unknown	95
ABJ60873.1	Q03YI6	2.A.87.2.1	gnl|BL_ORD_ID|10653 gnl|TC-DB|Q03YI6|2.A.87.2.1 Pantothenate transporter PanT OS=Leuconostoc mesenteroides subsp. mesenteroides (strain ATCC 8293 / NCDO 523) GN=panT PE=1 SV=1	207	3.17422e-24	34	222	204	90.5	97.1	6	6	6.55	2.A.87	Pantothenate	97
ABJ61132.1	P0AD30	2.A.102.3.1	gnl|BL_ORD_ID|7535 gnl|TC-DB|P0AD30|2.A.102.3.1 Inner membrane protein yfcA - Escherichia coli.	252	3.44756e-20	23	253	269	99.2	92.2	8	9	6.55	TSUP	Unknown	99
ABJ60601.1	P0ABG7	2.A.103.1.2	gnl|BL_ORD_ID|7499 gnl|TC-DB|P0ABG7|2.A.103.1.2 Rod shape-determining protein rodA - Escherichia coli.	398	4.22559e-46	32	398	370	97.2	98.1	9	9	4.9	MPE	Lipid II	101
ABJ60549.1	P07373	2.A.103.1.3	gnl|BL_ORD_ID|7247 gnl|TC-DB|P07373|2.A.103.1.3 STAGE V SPORULATION PROTEIN E - Bacillus subtilis.	376	7.80507e-64	35	394	366	94.2	96.2	10	10	5.9	MPE	Lipid II	102
ABJ59501.1	B5UIP4	2.A.109.1.3	gnl|BL_ORD_ID|1770 gnl|TC-DB|B5UIP4|2.A.109.1.3 Putative tellurium resistance protein OS=Bacillus cereus AH1134 GN=BCAH1134_0458 PE=4 SV=1	256	4.09693e-67	45	260	263	98.1	93.5	7	7	5.4	TerC	Unknown	103
ABJ60496.1	P39803	2.A.115.1.1	gnl|BL_ORD_ID|8990 gnl|TC-DB|P39803|2.A.115.1.1 UPF0750 membrane protein yitT OS=Bacillus subtilis (strain 168) GN=yitT PE=3 SV=2	273	1.35599e-72	40	292	280	93.2	96.8	5	5	4.1	NbcE	Novobiocin	104
ABJ60296.1	P94357	2.A.115.1.2	gnl|BL_ORD_ID|10298 gnl|TC-DB|P94357|2.A.115.1.2 UPF0750 membrane protein YxkD OS=Bacillus subtilis (strain 168) GN=yxkD PE=3 SV=1	280	6.53864e-50	32	296	278	93.2	97.5	5	5	4.5	NbcE	Unknown	105
ABJ59950.1	Q38YQ0	2.A.118.1.7	gnl|BL_ORD_ID|11821 gnl|TC-DB|Q38YQ0|2.A.118.1.7 Putative transport protein OS=Lactobacillus sakei subsp. sakei (strain 23K) GN=LCA_0376 PE=4 SV=1	513	1.42217e-141	41	512	519	98.8	97.9	13	13	10.15	ArcD	Citruline, Ornithine	107
ABJ59629.1	Q8DT27	3.A.1.1.27	gnl|BL_ORD_ID|14278 gnl|TC-DB|Q8DT27|3.A.1.1.27 Putative maltose/maltodextrin ABC transporter, permease protein MalF - Streptococcus mutans.	446	2.92413e-158	54	451	453	97.6	97.1	8	8	8.9	ABC	Maltose, Maltotriose, Maltotetraose, Trehalose	112
ABJ59630.1	Q8DT26	3.A.1.1.27	gnl|BL_ORD_ID|14277 gnl|TC-DB|Q8DT26|3.A.1.1.27 Putative maltose/maltodextrin ABC transporter, MalG permease - Streptococcus mutans.	270	2.20164e-102	56	285	278	94	95.3	6	6	5.8	ABC	Maltose, Maltotriose, Maltotetraose, Trehalose	113
ABJ60935.1	Q5SLB5	3.A.1.1.50	gnl|BL_ORD_ID|12828 gnl|TC-DB|Q5SLB5|3.A.1.1.50 Sugar ABC transporter, permease protein OS=Thermus thermophilus (strain HB8 / ATCC 27634 / DSM 579) GN=TTHA0378 PE=3 SV=1	218	1.72893e-52	37	276	378	78.6	57.4	6	5	4.75	ABC	glycerophosphocholine	114
ABJ60936.1	Q5SLB6	3.A.1.1.50	gnl|BL_ORD_ID|12829 gnl|TC-DB|Q5SLB6|3.A.1.1.50 Sugar ABC transporter, permease protein OS=Thermus thermophilus (strain HB8 / ATCC 27634 / DSM 579) GN=TTHA0377 PE=3 SV=1	295	2.56788e-52	35	287	299	94.1	97	6	7	3.6	ABC	glycerophosphocholine	115
ABJ61122.1	Q8DU36	3.A.1.2.12	gnl|BL_ORD_ID|14280 gnl|TC-DB|Q8DU36|3.A.1.2.12 Putative ABC transporter - Streptococcus mutans.	351	2.80471e-84	40	357	349	98	98.9	1	1	0	ABC	Deoxyribonucleosides	116
ABJ59928.1	A1VZQ3	3.A.1.3.16	gnl|BL_ORD_ID|294 gnl|TC-DB|A1VZQ3|3.A.1.3.16 Amino acid ABC transporter, permease protein PEB1 - Campylobacter jejuni subsp. jejuni serotype O:23/36 (strain 81-176).	199	2.23783e-39	33	216	250	91.7	78.8	5	5	4.2	ABC	aspartate, glutamate	119
ABJ59926.1	Q0P9X8	3.A.1.3.16	gnl|BL_ORD_ID|10952 gnl|TC-DB|Q0P9X8|3.A.1.3.16 Major cell-binding factor - Campylobacter jejuni.	255	2.18457e-35	31	277	259	90.3	96.5	1	1	0.5	ABC	aspartate, glutamate	120
ABJ59498.1	Q9A1H0	3.A.1.3.20	gnl|BL_ORD_ID|15706 gnl|TC-DB|Q9A1H0|3.A.1.3.20 Putative glutamine-binding periplasmic protein OS=Streptococcus pyogenes serotype M1 GN=SPy_0277 PE=4 SV=1	521	2.52785e-168	49	537	522	95.5	98.5	6	5	4.45	ABC	lysine	121
ABJ59765.1	Q8RCC4	3.A.1.3.27	gnl|BL_ORD_ID|14819 gnl|TC-DB|Q8RCC4|3.A.1.3.27 ABC-type amino acid transport system, periplasmic component OS=Caldanaerobacter subterraneus subsp. tengcongensis (strain DSM 15242 / JCM 11007 / NBRC 100824 / MB4) GN=ArtI PE=3 SV=1	264	6.60451e-38	27	263	260	98.9	98.8	1	1	0.85	ABC	Glutamine, glutamate, Asparagine	124
ABJ60169.1	F0TFS6	3.A.1.5.32	gnl|BL_ORD_ID|3691 gnl|TC-DB|F0TFS6|3.A.1.5.32 Oligopeptide ABC transporter substrate OS=Lactobacillus acidophilus (strain 30SC) GN=LAC30SC_07290 PE=4 SV=1	585	0	74	605	583	96.4	99.8	1	1	0.9	ABC	Alpha-galactosides	125
ABJ60170.1	F0TFS5	3.A.1.5.32	gnl|BL_ORD_ID|3690 gnl|TC-DB|F0TFS5|3.A.1.5.32 Oligopeptide ABC trasporter substrate binding protein OS=Lactobacillus acidophilus (strain 30SC) GN=LAC30SC_07285 PE=4 SV=1	590	0	76	590	590	99	99.8	1	1	0.9	ABC	Alpha-galactosides	126
ABJ60167.1	F0TFS8	3.A.1.5.32	gnl|BL_ORD_ID|3693 gnl|TC-DB|F0TFS8|3.A.1.5.32 Oligopeptide transport protein OS=Lactobacillus acidophilus (strain 30SC) GN=LAC30SC_07300 PE=3 SV=1	320	0	81	320	319	99.7	99.7	6	6	6.45	ABC	Alpha-galactosides	127
ABJ60119.1	F0TFS6	3.A.1.5.32	gnl|BL_ORD_ID|3691 gnl|TC-DB|F0TFS6|3.A.1.5.32 Oligopeptide ABC transporter substrate OS=Lactobacillus acidophilus (strain 30SC) GN=LAC30SC_07290 PE=4 SV=1	578	0	55	591	583	97	98.3	1	1	0.9	ABC	Alpha-galactosides	128
ABJ60168.1	F0TFS7	3.A.1.5.32	gnl|BL_ORD_ID|3692 gnl|TC-DB|F0TFS7|3.A.1.5.32 Oligopeptide ABC transporter, permease protein OS=Lactobacillus acidophilus (strain 30SC) GN=LAC30SC_07295 PE=3 SV=1	300	9.82903e-173	78	304	310	98.4	96.5	5	6	5.15	ABC	Alpha-galactosides	129
ABJ59945.1	O51234	3.A.1.7.5	gnl|BL_ORD_ID|6279 gnl|TC-DB|O51234|3.A.1.7.5 Phosphate ABC transporter, permease protein PstC OS=Borrelia burgdorferi (strain ATCC 35210 / B31 / CIP 102532 / DSM 4680) GN=pstC PE=3 SV=1	281	1.32105e-59	41	331	302	81.9	92.1	6	6	4.85	ABC	phosphate	130
ABJ59543.1	P16683	3.A.1.9.1	gnl|BL_ORD_ID|7982 gnl|TC-DB|P16683|3.A.1.9.1 Phosphonates transport system permease protein phnE - Escherichia coli.	257	8.44642e-47	34	289	259	88.6	98.1	6	6	4.85	ABC	Fe3+	132
ABJ59544.1	Q119I8	3.A.1.9.3	gnl|BL_ORD_ID|11046 gnl|TC-DB|Q119I8|3.A.1.9.3 Phosphonate ABC transporter, inner membrane subunit OS=Trichodesmium erythraeum (strain IMS101) OX=203124 GN=Tery_0367 PE=3 SV=1	273	4.16421e-45	32	270	272	97.4	97.8	6	6	5.5	ABC	None	133
ABJ59541.1	Q119I9	3.A.1.9.3	gnl|BL_ORD_ID|11047 gnl|TC-DB|Q119I9|3.A.1.9.3 Phosphonate ABC transporter, periplasmic phosphonate-binding protein OS=Trichodesmium erythraeum (strain IMS101) OX=203124 GN=Tery_0366 PE=1 SV=1	301	1.01216e-25	24	309	298	96.8	94.3	1	1	0.8	ABC	None	134
ABJ61121.1	Q119I9	3.A.1.9.3	gnl|BL_ORD_ID|11047 gnl|TC-DB|Q119I9|3.A.1.9.3 Phosphonate ABC transporter, periplasmic phosphonate-binding protein OS=Trichodesmium erythraeum (strain IMS101) OX=203124 GN=Tery_0366 PE=1 SV=1	297	8.99515e-22	25	310	298	95.5	93	1	1	0.85	ABC	None	135
ABJ60652.1	Q97Q45	3.A.1.11.7	gnl|BL_ORD_ID|15591 gnl|TC-DB|Q97Q45|3.A.1.11.7 Spermidine/putrescine ABC transporter, spermidine/putrescine-binding protein OS=Streptococcus pneumoniae serotype 4 (strain ATCC BAA-334 / TIGR4) GN=potD PE=4 SV=1	355	1.93319e-145	57	357	356	99.2	99.2	1	1	0.85	ABC	Spermidine, Putrescine	136
ABJ60654.1	Q97Q43	3.A.1.11.7	gnl|BL_ORD_ID|15589 gnl|TC-DB|Q97Q43|3.A.1.11.7 Spermidine/putrescine ABC transporter, permease protein OS=Streptococcus pneumoniae serotype 4 (strain ATCC BAA-334 / TIGR4) GN=potH PE=3 SV=1	266	4.14596e-110	59	270	275	97	96.4	6	6	5.8	ABC	Spermidine, Putrescine	137
ABJ60653.1	Q97Q44	3.A.1.11.7	gnl|BL_ORD_ID|15590 gnl|TC-DB|Q97Q44|3.A.1.11.7 Spermidine/putrescine ABC transporter, permease protein OS=Streptococcus pneumoniae serotype 4 (strain ATCC BAA-334 / TIGR4) GN=potC PE=3 SV=1	252	1.34972e-105	61	265	257	94.7	97.3	6	7	6.3	ABC	Spermidine, Putrescine	138
ABJ60097.1	Q93A34	3.A.1.12.8	gnl|BL_ORD_ID|15316 gnl|TC-DB|Q93A34|3.A.1.12.8 BilEB - Listeria monocytogenes.	503	5.73144e-170	50	516	504	97.3	97.2	6	6	5.55	ABC	Glycine betaine, Proline	139
ABJ61008.1	O33704	3.A.1.15.3	gnl|BL_ORD_ID|6118 gnl|TC-DB|O33704|3.A.1.15.3 ADCB PROTEIN - Streptococcus pneumoniae.	259	6.57556e-31	27	263	268	96.6	95.5	7	7	6.55	ABC	Zn2+	140
ABJ61010.1	Q9KIJ3	3.A.1.15.20	gnl|BL_ORD_ID|16297 gnl|TC-DB|Q9KIJ3|3.A.1.15.20 Metal ABC transporter substrate-binding lipoprotein OS=Streptococcus mutans serotype c (strain ATCC 700610 / UA159) OX=210007 GN=sloC PE=3 SV=2	312	4.32637e-27	28	308	306	92.5	98	1	2	0.9	ABC	None	141
ABJ60233.1	Q8K8K9	3.A.1.24.3	gnl|BL_ORD_ID|14569 gnl|TC-DB|Q8K8K9|3.A.1.24.3 Putative lipoprotein (Putative uncharacterized protein SPs1626) OS=Streptococcus pyogenes serotype M3 GN=atmB PE=4 SV=1	260	2.63527e-81	50	284	281	87.3	91.8	1	1	0.7	ABC	Methionine	143
ABJ60235.1	Q04MS5	3.A.1.24.6	gnl|BL_ORD_ID|10690 gnl|TC-DB|Q04MS5|3.A.1.24.6 ABC transporter, permease protein, putative OS=Streptococcus pneumoniae serotype 2 (strain D39 / NCTC 7466) GN=SPD_0154 PE=3 SV=1	231	8.04965e-95	60	233	230	98.7	99.6	5	5	4.95	ABC	peptides	144
ABJ60279.1	Q8Y5W0	3.A.1.25.8	gnl|BL_ORD_ID|15131 gnl|TC-DB|Q8Y5W0|3.A.1.25.8 Riboflavin transporter OS=Listeria monocytogenes serovar 1/2a (strain ATCC BAA-679 / EGD-e) GN=lmo1945 PE=3 SV=1	191	2.4967e-36	35	205	203	92.2	90.6	5	5	5.15	ABC	None	145
ABJ59783.1	Q03S56	3.A.1.26.9	gnl|BL_ORD_ID|10651 gnl|TC-DB|Q03S56|3.A.1.26.9 Uncharacterized protein OS=Lactobacillus brevis (strain ATCC 367 / JCM 1170) GN=LVIS_0823 PE=4 SV=1	162	2.00278e-42	40	180	177	89.4	89.8	5	5	4.65	ABC	folate	146
ABJ59726.1	I7BV49	3.A.1.26.10	gnl|BL_ORD_ID|4836 gnl|TC-DB|I7BV49|3.A.1.26.10 Energy-coupling factor transporter transmembrane protein EcfT OS=Enterococcus faecalis D32 GN=ecfT PE=3 SV=1	266	3.71477e-105	55	267	264	99.3	99.6	6	6	4.95	ABC	Folic acid	147
ABJ60857.1	Q74I61	3.A.1.29.1	gnl|BL_ORD_ID|13588 gnl|TC-DB|Q74I61|3.A.1.29.1 ABC transporter permease component OS=Lactobacillus johnsonii GN=LJ_1705 PE=4 SV=1	276	0	96	293	276	93.9	99.6	7	6	5.2	ABC	Methionine precursors	148
ABJ60855.1	Q74I63	3.A.1.29.1	gnl|BL_ORD_ID|13590 gnl|TC-DB|Q74I63|3.A.1.29.1 UPF0397 protein LJ_1703 OS=Lactobacillus johnsonii GN=LJ_1703 PE=3 SV=1	185	1.04936e-125	95	185	185	99.5	99.5	5	5	5.4	ABC	Methionine precursors	149
ABJ59485.1	Q97RS4	3.A.1.30.2	gnl|BL_ORD_ID|15595 gnl|TC-DB|Q97RS4|3.A.1.30.2 Putative uncharacterized protein OS=Streptococcus pneumoniae serotype 4 (strain ATCC BAA-334 / TIGR4) GN=SP_0719 PE=4 SV=1	175	7.12762e-46	41	194	186	89.7	93.5	4	4	2.7	ABC	thiamin	150
ABJ59483.1	Q97RS2	3.A.1.30.2	gnl|BL_ORD_ID|15593 gnl|TC-DB|Q97RS2|3.A.1.30.2 Putative uncharacterized protein OS=Streptococcus pneumoniae serotype 4 (strain ATCC BAA-334 / TIGR4) GN=SP_0721 PE=4 SV=1	218	1.73237e-17	29	217	216	97.2	95.4	6	6	4	ABC	thiamin	151
ABJ59667.1	Q99ZY4	3.A.1.34.1	gnl|BL_ORD_ID|15696 gnl|TC-DB|Q99ZY4|3.A.1.34.1 ABC transporter permease protein OS=Streptococcus pyogenes serotype M1 GN=M5005_Spy0745 PE=4 SV=1	284	1.48088e-101	54	308	289	90.9	96.2	9	8	6.8	ABC	tryptophan	153
ABJ59668.1	Q99ZY3	3.A.1.34.1	gnl|BL_ORD_ID|15695 gnl|TC-DB|Q99ZY3|3.A.1.34.1 Putative ABC transporter (ATP-binding protein) OS=Streptococcus pyogenes serotype M1 GN=SPy_1019 PE=4 SV=1	253	1.53542e-83	53	254	252	99.2	99.6	1	1	1	ABC	tryptophan	154
ABJ59666.1	Q99ZY6	3.A.1.34.1	gnl|BL_ORD_ID|15697 gnl|TC-DB|Q99ZY6|3.A.1.34.1 ABC transporter substrate-binding protein OS=Streptococcus pyogenes serotype M1 GN=M5005_Spy0743 PE=4 SV=1	305	3.41889e-66	35	347	332	87.6	91	1	1	0.6	ABC	tryptophan	155
ABJ60187.1	O07550	3.A.1.106.8	gnl|BL_ORD_ID|5831 gnl|TC-DB|O07550|3.A.1.106.8 Probable multidrug resistance ABC transporter ATP-binding/permease protein yheI OS=Bacillus subtilis GN=yheI PE=1 SV=1	581	4.75973e-166	44	588	585	98	97.8	6	6	5.95	ABC	doxorubicin, mitoxantrone, ethidium, Hoechst 33342	156
ABJ60188.1	O07549	3.A.1.106.8	gnl|BL_ORD_ID|5830 gnl|TC-DB|O07549|3.A.1.106.8 Probable multidrug resistance ABC transporter ATP-binding/permease protein yheH OS=Bacillus subtilis GN=yheH PE=1 SV=1	514	3.77047e-128	40	597	673	85.4	75.9	5	6	3.65	ABC	doxorubicin, mitoxantrone, ethidium, Hoechst 33342	157
ABJ59842.1	Q0P9C4	3.A.1.106.15	gnl|BL_ORD_ID|10948 gnl|TC-DB|Q0P9C4|3.A.1.106.15 Protein glycosylation K OS=Campylobacter jejuni subsp. jejuni serotype O:2 (strain ATCC 700819 / NCTC 11168) GN=pglK PE=1 SV=1	467	5.621e-45	25	544	564	84.2	81.6	5	5	3.9	ABC	lipids	158
ABJ60431.1	Q0P9C4	3.A.1.106.15	gnl|BL_ORD_ID|10948 gnl|TC-DB|Q0P9C4|3.A.1.106.15 Protein glycosylation K OS=Campylobacter jejuni subsp. jejuni serotype O:2 (strain ATCC 700819 / NCTC 11168) GN=pglK PE=1 SV=1	519	2.90623e-36	25	525	564	95.6	85.6	5	5	1.8	ABC	lipids	159
ABJ59816.1	P33116	3.A.1.111.2	gnl|BL_ORD_ID|8590 gnl|TC-DB|P33116|3.A.1.111.2 Subtilin transport ATP-binding protein spaT - Bacillus subtilis.	586	6.92763e-78	27	587	614	97.8	94.6	5	5	4.55	ABC	Subtilin	163
ABJ61046.1	H2GZC4	3.A.1.122.11	gnl|BL_ORD_ID|4542 gnl|TC-DB|H2GZC4|3.A.1.122.11 ABC transporter system involved in hemin toxicity inner membrane protein OS=Corynebacterium diphtheriae (strain ATCC 27012 / C7 (beta)) GN=hrtB PE=4 SV=1	353	5.70436e-24	25	350	344	99.7	98.5	4	4	2.9	ABC	Hemin	169
ABJ61114.1	Q03RZ6	3.A.1.122.13	gnl|BL_ORD_ID|10650 gnl|TC-DB|Q03RZ6|3.A.1.122.13 ABC-type antimicrobial peptide transport system, ATPase component - Lactobacillus brevis (strain ATCC 367 / JCM 1170)	782	1.42606e-83	28	779	667	99.7	99.4	3	5	0	ABC	Antimicrobial peptides	170
ABJ60850.1	O52853	3.A.1.124.2	gnl|BL_ORD_ID|6300 gnl|TC-DB|O52853|3.A.1.124.2 SpaE - Bacillus subtilis.	246	3.30878e-14	26	227	251	98.2	94	6	6	5.4	ABC	Subtilin	172
ABJ61117.1	P29018	3.A.1.129.1	gnl|BL_ORD_ID|8370 gnl|TC-DB|P29018|3.A.1.129.1 Transport ATP-binding protein cydD - Escherichia coli.	592	2.52464e-74	27	605	588	96.2	94.9	5	6	4.75	ABC	Cysteine, Glutathione	173
ABJ61118.1	P23886	3.A.1.129.1	gnl|BL_ORD_ID|8199 gnl|TC-DB|P23886|3.A.1.129.1 Transport ATP-binding protein cydC - Escherichia coli.	577	3.50501e-63	28	581	573	96.4	98.8	5	6	3.95	ABC	Cysteine, Glutathione	174
ABJ60981.1	Q8Y5E9	3.A.1.134.12	gnl|BL_ORD_ID|15127 gnl|TC-DB|Q8Y5E9|3.A.1.134.12 Lmo2115 protein OS=Listeria monocytogenes serovar 1/2a (strain ATCC BAA-679 / EGD-e) GN=lmo2115 PE=4 SV=1	672	5.41489e-47	23	622	646	99.5	99.5	10	10	7.4	ABC	Beta-lactam antibiotics, Nisin, Gallidermin, Bacitracin	175
ABJ61024.1	Q9WYC4	3.A.1.135.5	gnl|BL_ORD_ID|17167 gnl|TC-DB|Q9WYC4|3.A.1.135.5 Uncharacterized ABC transporter ATP-binding protein TM_0288 OS=Thermotoga maritima (strain ATCC 43589 / MSB8 / DSM 3109 / JCM 10099) GN=TM_0288 PE=1 SV=1	602	1.03977e-147	40	616	598	97.6	95.3	5	5	4.55	ABC	Daunomycin, 2,7-bis(carboxyethyl)-5(6)-carboxyfluorescein-acetoxymethylester	176
ABJ59923.1	Q837P4	3.A.1.135.8	gnl|BL_ORD_ID|14002 gnl|TC-DB|Q837P4|3.A.1.135.8 ABC transporter, ATP-binding/permease protein OS=Enterococcus faecalis (strain ATCC 700802 / V583) GN=EF_0790 PE=4 SV=1	589	0	56	592	589	99.3	99.8	5	5	4.7	ABC	daunorubicin, doxorubicin, ethidium, Hoechst 33342, Fluoroquinolones	177
ABJ59922.1	Q837P5	3.A.1.135.8	gnl|BL_ORD_ID|14003 gnl|TC-DB|Q837P5|3.A.1.135.8 ABC transporter, ATP-binding/permease protein OS=Enterococcus faecalis (strain ATCC 700802 / V583) GN=EF_0789 PE=4 SV=1	574	0	51	577	571	98.8	99.6	6	6	6.2	ABC	daunorubicin, doxorubicin, ethidium, Hoechst 33342, Fluoroquinolones	178
ABJ60322.1	P77307	3.A.1.139.2	gnl|BL_ORD_ID|10106 gnl|TC-DB|P77307|3.A.1.139.2 UPF0014 inner membrane protein ybbM OS=Escherichia coli (strain K12) GN=ybbM PE=1 SV=2	251	2.43048e-91	58	253	259	98.8	96.5	7	7	6.65	ABC	Fe2+	181
ABJ59939.1	Q2FLJ9	3.A.3.1.8	gnl|BL_ORD_ID|11628 gnl|TC-DB|Q2FLJ9|3.A.3.1.8 ATPase, E1-E2 type OS=Methanospirillum hungatei (strain JF-1 / DSM 864) GN=Mhun_0636 PE=4 SV=1	918	0	49	933	931	97.9	97.3	8	10	5.3	P-ATPase	Na+, K+	187
ABJ60880.1	Q04JJ5	3.A.3.2.28	gnl|BL_ORD_ID|10689 gnl|TC-DB|Q04JJ5|3.A.3.2.28 Cation-transporting ATPase, E1-E2 family protein OS=Streptococcus pneumoniae serotype 2 (strain D39 / NCTC 7466) GN=SPD_1383 PE=3 SV=1	892	0	59	893	898	99.1	98.3	10	10	8.75	P-ATPase	Ca2+, Mn2+	188
ABJ60589.1	GAT39076	3.A.3.2.46	gnl|BL_ORD_ID|4461 gnl|TC-DB|GAT39076.1|3.A.3.2.46 ATPase [Listeria monocytogenes]	889	0	48	875	880	99	99	10	9	7.4	P-ATPase	None	189
ABJ60224.1	Q9X6G0	3.A.3.3.3	gnl|BL_ORD_ID|17225 gnl|TC-DB|Q9X6G0|3.A.3.3.3 Cadmium/manganese transport ATPase - Lactobacillus plantarum.	624	0	54	634	758	97.3	82.2	6	9	3.45	P-ATPase	Mn2+, Cd2+	190
ABJ60347.1	I4G6G7	3.A.3.4.5	gnl|BL_ORD_ID|4798 gnl|TC-DB|I4G6G7|3.A.3.4.5 Magnesium-transporting ATPase, P-type 1 OS=Microcystis aeruginosa PCC 9443 OX=1160281 GN=mgtA PE=4 SV=1	903	0	45	912	912	96.2	96.1	9	8	5.85	P-ATPase	None	191
ABJ61150.1	Q7A3E6	3.A.3.5.19	gnl|BL_ORD_ID|13636 gnl|TC-DB|Q7A3E6|3.A.3.5.19 Copper-transporting ATPase copA - Staphylococcus aureus (strain N315).	640	0	48	644	802	97.2	78.8	8	7	4.2	P-ATPase	Cu2+, Fe2+, Pb2+	192
ABJ60241.1	Q835V4	3.A.3.23.2	gnl|BL_ORD_ID|14001 gnl|TC-DB|Q835V4|3.A.3.23.2 Cation-transporting ATPase, E1-E2 family - Enterococcus faecalis (Streptococcus faecalis).	771	0	56	808	806	94.4	95.2	10	10	6.9	P-ATPase	cations	194
ABJ61101.1	Q830Z1	3.A.3.25.3	gnl|BL_ORD_ID|13998 gnl|TC-DB|Q830Z1|3.A.3.25.3 Cadmium-translocating P-type ATPase - Enterococcus faecalis (Streptococcus faecalis).	616	0	50	630	601	97	99.2	7	7	4.2	P-ATPase	cations	195
ABJ59821.1	P0ADZ7	3.A.5.1.1	gnl|BL_ORD_ID|7551 gnl|TC-DB|P0ADZ7|3.A.5.1.1 UPF0092 membrane protein YajC OS=Escherichia coli (strain K12) GN=yajC PE=1 SV=1	108	9.16802e-10	26	150	110	67.3	97.3	1	1	0.8	Sec	proteins	196
ABJ59716.1	P16336	3.A.5.2.1	gnl|BL_ORD_ID|7965 gnl|TC-DB|P16336|3.A.5.2.1 PREPROTEIN TRANSLOCASE SECY SUBUNIT - Bacillus subtilis.	435	1.95149e-135	49	431	431	99.8	99.5	10	10	8.7	Sec	proteins	197
ABJ60872.1	Q15HU6	3.A.7.14.2	gnl|BL_ORD_ID|11210 gnl|TC-DB|Q15HU6|3.A.7.14.2 TcpG - Clostridium perfringens.	150	2.81961e-29	41	208	334	70.7	43.7	1	1	0.75	IVSP	DNA	201
ABJ60312.1	Q15HU4	3.A.7.14.2	gnl|BL_ORD_ID|11208 gnl|TC-DB|Q15HU4|3.A.7.14.2 TcpI - Clostridium perfringens.	161	2.61995e-14	29	187	164	82.4	83.5	4	4	1.7	IVSP	DNA	203
ABJ60543.1	P39695	3.A.11.1.1	gnl|BL_ORD_ID|8978 gnl|TC-DB|P39695|3.A.11.1.1 COME OPERON PROTEIN 3 - Bacillus subtilis.	759	3.21497e-78	28	761	776	94.6	96.4	9	12	3.65	DNA-T	ssDNA	204
ABJ60544.1	Q8DQ41	3.A.11.1.2	gnl|BL_ORD_ID|14259 gnl|TC-DB|Q8DQ41|3.A.11.1.2 Competence protein - Streptococcus pneumoniae (strain ATCC BAA-255 / R6).	226	1.04081e-40	37	246	216	91.1	97.2	1	1	0.7	DNA-T	ssDNA	205
ABJ59819.1	AKM80389	3.A.11.1.5	gnl|BL_ORD_ID|1209 gnl|TC-DB|AKM80389.1|3.A.11.1.5 Holliday junction ATP-dependent DNA helicase RuvA [Candidatus Saccharibacteria bacterium GW2011_GWC2_44_17]	172	6.91914e-26	33	192	192	85.4	88.5	1	1	0	DNA-T	None	206
ABJ60706.1	P21458	3.A.12.1.1	gnl|BL_ORD_ID|8100 gnl|TC-DB|P21458|3.A.12.1.1 Stage III sporulation protein E - Bacillus subtilis.	818	0	45	808	787	99.6	99.5	4	4	3.3	S-DNA-T	DNA	207
ABJ60637.1	G2JS06	3.A.14.1.2	gnl|BL_ORD_ID|4198 gnl|TC-DB|G2JS06|3.A.14.1.2 Late competence protein ComGB OS=Listeria monocytogenes J0161 GN=LMOG_00363 PE=4 SV=1	326	6.66684e-15	21	339	343	91.2	94.8	6	5	1.8	FPE	proteins	208
ABJ61115.1	P0ABJ9	3.D.4.3.2	gnl|BL_ORD_ID|7506 gnl|TC-DB|P0ABJ9|3.D.4.3.2 Cytochrome d ubiquinol oxidase subunit 1 OS=Escherichia coli (strain K12) GN=cydA PE=1 SV=1	481	4.03106e-88	34	465	522	91	90.6	9	9	6.4	COX	H+	210
ABJ61116.1	P0ABK2	3.D.4.3.2	gnl|BL_ORD_ID|7507 gnl|TC-DB|P0ABK2|3.D.4.3.2 Cytochrome d ubiquinol oxidase subunit 2 OS=Escherichia coli (strain K12) GN=cydB PE=1 SV=1	361	1.26195e-59	33	340	379	95.9	94.5	8	9	5.25	COX	H+	211
ABJ60976.1	P20166	4.A.1.1.9	gnl|BL_ORD_ID|8073 gnl|TC-DB|P20166|4.A.1.1.9 PTS system, glucose-specific IICBA component (EIICBA-Glc) (Glucose- permease IICBA component) (Phosphotransferase enzyme II, CBA component) (EC 2.7.1.69) (EII-Glc/EIII-Glc) - Bacillus subtilis.	703	2.12387e-165	40	691	699	97.1	97.7	11	13	7.2	Glc	glucose	212
ABJ60961.1	ART98499	4.A.1.2.14	gnl|BL_ORD_ID|1337 gnl|TC-DB|ART98499|4.A.1.2.14 PTS beta-glucoside transporter subunit EIIBCA [Lactobacillus gasseri]	672	0	99	672	672	99.9	99.9	12	12	12.45	Glc	beta-glucosides	213
ABJ59932.1	ART98499	4.A.1.2.14	gnl|BL_ORD_ID|1337 gnl|TC-DB|ART98499|4.A.1.2.14 PTS beta-glucoside transporter subunit EIIBCA [Lactobacillus gasseri]	470	1.39083e-98	38	654	672	69.4	68.9	9	12	6.55	Glc	beta-glucosides	214
ABJ61043.1	ART98417	4.A.1.2.15	gnl|BL_ORD_ID|1336 gnl|TC-DB|ART98417|4.A.1.2.15 PTS beta-glucoside transporter subunit EIIBCA [Lactobacillus gasseri]	624	0	100	624	624	99.8	99.8	7	7	7.55	Glc	beta-glucosides	215
ABJ61065.1	ART98386	4.A.1.2.16	gnl|BL_ORD_ID|1335 gnl|TC-DB|ART98386|4.A.1.2.16 PTS beta-glucoside transporter subunit EIIBCA [Lactobacillus gasseri]	647	0	100	647	647	99.8	99.8	10	10	10.45	Glc	beta glucosides	216
ABJ59803.1	ART98386	4.A.1.2.16	gnl|BL_ORD_ID|1335 gnl|TC-DB|ART98386|4.A.1.2.16 PTS beta-glucoside transporter subunit EIIBCA [Lactobacillus gasseri]	657	3.53215e-145	40	654	647	96.9	99.5	11	10	7.75	Glc	beta glucosides	217
ABJ61014.1	Q1LZ59	4.A.2.1.7	gnl|BL_ORD_ID|11441 gnl|TC-DB|Q1LZ59|4.A.2.1.7 Inducible fructose permease - Streptococcus mutans UA159.	671	0	48	661	655	98.6	99.5	10	10	8.75	Fru	fructose, Xylitol	218
ABJ59561.1	Q8DWE7	4.A.2.1.8	gnl|BL_ORD_ID|14289 gnl|TC-DB|Q8DWE7|4.A.2.1.8 Putative PTS system, fructose-specific IIBC component - Streptococcus mutans.	458	0	59	643	466	70.9	97.6	9	8	7.75	Fru	fructose	219
ABJ59749.1	Q045X3	4.A.3.1.2	gnl|BL_ORD_ID|10670 gnl|TC-DB|Q045X3|4.A.3.1.2 PTS system lactose-specific IIB component, Lac family / PTS system lactose-specific IIC component, Lac family OS=Lactobacillus gasseri (strain ATCC 33323 / DSM 20243) GN=LGAS_0343 PE=4 SV=1	567	0	100	567	567	99.8	99.8	9	9	9.85	Lac	Lactose	220
ABJ59899.1	Q045H3	4.A.3.1.3	gnl|BL_ORD_ID|10668 gnl|TC-DB|Q045H3|4.A.3.1.3 PTS system lactose-specific IIB component, Lac family / PTS system lactose-specific IIC component, Lac family OS=Lactobacillus gasseri (strain ATCC 33323 / DSM 20243) GN=LGAS_0501 PE=4 SV=1	565	0	100	565	565	99.8	99.8	9	9	9.5	Lac	Lactose	221
ABJ61125.1	P46317	4.A.3.2.2	gnl|BL_ORD_ID|9292 gnl|TC-DB|P46317|4.A.3.2.2 PTS SYSTEM, CELLOBIOSE-SPECIFIC IIC COMPONENT (EIIC-CEL) (CELLOBIOSE- PERMEASE IIC COMPONENT) (PHOSPHOTRANSFERASE ENZYME II, C COMPONENT) - Bacillus subtilis.	428	4.882e-96	39	494	452	84	93.4	12	10	7.75	Lac	Lichenan oligosaccharides	222
ABJ59967.1	Q9CJ32	4.A.3.2.4	gnl|BL_ORD_ID|15861 gnl|TC-DB|Q9CJ32|4.A.3.2.4 Cellobiose-specific PTS system IIC component - Lactococcus lactis subsp. lactis (Streptococcus lactis).	494	4.40736e-103	36	443	494	97.3	99.4	8	9	4.2	Lac	Cellobiose	224
ABJ61086.1	Q9CJ32	4.A.3.2.4	gnl|BL_ORD_ID|15861 gnl|TC-DB|Q9CJ32|4.A.3.2.4 Cellobiose-specific PTS system IIC component - Lactococcus lactis subsp. lactis (Streptococcus lactis).	279	1.11703e-19	26	439	494	58.3	56.1	8	9	3.95	Lac	Cellobiose	225
ABJ60967.1	Q9KSH4	4.A.3.2.6	gnl|BL_ORD_ID|16337 gnl|TC-DB|Q9KSH4|4.A.3.2.6 PTS system, cellobiose-specific IIC component OS=Vibrio cholerae GN=VC_1282 PE=4 SV=1	434	2.00628e-80	32	440	446	98	94.8	10	10	6.25	Lac	Glucoseamine	226
ABJ59606.1	Q72XQ0	4.A.3.2.8	gnl|BL_ORD_ID|13512 gnl|TC-DB|Q72XQ0|4.A.3.2.8 PTS system, cellobiose-specific IIC component OS=Bacillus cereus (strain ATCC 10987) GN=celB PE=1 SV=1	458	3.72246e-77	33	476	433	95	98.4	10	10	4.35	Lac	N-, N'-diacetylchitobiose	227
ABJ59598.1	O05507	4.A.3.2.10	gnl|BL_ORD_ID|5782 gnl|TC-DB|O05507|4.A.3.2.10 PTS system oligo-beta-mannoside-specific EIIC component OS=Bacillus subtilis (strain 168) OX=224308 GN=gmuC PE=1 SV=1	458	8.6254e-69	31	450	442	97.1	95.7	10	10	5.2	Lac	None	228
ABJ61080.1	Q04GJ9	4.A.6.1.10	gnl|BL_ORD_ID|10686 gnl|TC-DB|Q04GJ9|4.A.6.1.10 PTS system IID component, Man family OS=Oenococcus oeni (strain BAA-331 / PSU-1) GN=OEOE_0466 PE=4 SV=1	305	2.75856e-172	75	309	304	98.4	99.3	4	4	2.9	Man	glucose, fructose	232
ABJ61081.1	Q04GK0	4.A.6.1.10	gnl|BL_ORD_ID|10687 gnl|TC-DB|Q04GK0|4.A.6.1.10 Mannose-specific PTS system component IIC OS=Oenococcus oeni (strain BAA-331 / PSU-1) GN=OEOE_0465 PE=4 SV=1	273	1.59062e-143	76	267	271	99.6	99.6	7	7	6.5	Man	glucose, fructose	233
ABJ59914.1	B3WB11	4.A.6.1.13	gnl|BL_ORD_ID|1701 gnl|TC-DB|B3WB11|4.A.6.1.13 PTS system, IID component OS=Lactobacillus casei (strain BL23) GN=levG PE=4 SV=1	279	5.97891e-81	43	283	286	98.2	96.9	6	6	5.2	Man	Fucosyl-alpha-1,3-N-acetylglucosamine	234
ABJ59913.1	B3WB10	4.A.6.1.13	gnl|BL_ORD_ID|1700 gnl|TC-DB|B3WB10|4.A.6.1.13 PTS system, IIC component OS=Lactobacillus casei (strain BL23) GN=levF PE=4 SV=1	237	3.00085e-61	40	265	268	89.1	87.7	7	6	5.55	Man	Fucosyl-alpha-1,3-N-acetylglucosamine	235
ABJ59531.1	B3W756	4.A.6.1.18	gnl|BL_ORD_ID|1696 gnl|TC-DB|B3W756|4.A.6.1.18 Phosphotransferase system sugar-specific EIID component OS=Lactobacillus casei (strain BL23) GN=PTS-EIID PE=4 SV=1	272	1.19117e-149	76	272	273	99.3	99.3	6	6	5.05	Man	Galacto-N-biose, Lacto-N-biose, N-acetyl galactosamine	236
ABJ59530.1	B3W755	4.A.6.1.18	gnl|BL_ORD_ID|1695 gnl|TC-DB|B3W755|4.A.6.1.18 Phosphotransferase system sugar-specific EIIC component OS=Lactobacillus casei (strain BL23) GN=PTS-EIIC PE=4 SV=1	305	4.19222e-138	65	305	305	99.7	99.3	7	7	6.3	Man	Galacto-N-biose, Lacto-N-biose, N-acetyl galactosamine	237
ABJ59582.1	Q55487	4.D.1.1.14	gnl|BL_ORD_ID|12444 gnl|TC-DB|Q55487|4.D.1.1.14 Uncharacterized glycosyltransferase sll0501 OS=Synechocystis sp. (strain PCC 6803 / Kazusa) GN=sll0501 PE=3 SV=1	308	8.5341e-77	38	310	318	98.4	94.7	2	2	2.05	VGP	None	240
ABJ60913.1	F2KRG7	4.D.2.1.3	gnl|BL_ORD_ID|3760 gnl|TC-DB|F2KRG7|4.D.2.1.3 Lysylphosphatidylglycerol synthetase/UPF0104 OS=Archaeoglobus veneficus (strain DSM 11195 / SNP6) GN=Arcve_0713 PE=4 SV=1	327	1.89608e-23	28	338	330	95	94.2	8	8	5.6	GT2	Lysyl phosphatidyl glycerol	241
ABJ60701.1	Q6ADZ6	4.F.1.1.7	gnl|BL_ORD_ID|13063 gnl|TC-DB|Q6ADZ6|4.F.1.1.7 CDP-diacylglycerol--glycerol-3-phosphate 3-phosphatidyltransferase OS=Leifsonia xyli subsp. xyli (strain CTCB07) GN=pgsA PE=3 SV=1	185	3.7325e-30	36	187	189	94.7	91.5	4	5	2.95	CEPT1	phosphate	242
ABJ61119.1	Q8Y438	5.B.14.1.1	gnl|BL_ORD_ID|15124 gnl|TC-DB|Q8Y438|5.B.14.1.1 Lmo2635 protein OS=Listeria monocytogenes serovar 1/2a (strain ATCC BAA-679 / EGD-e) OX=169963 GN=lmo2635 PE=4 SV=1	312	1.16756e-37	29	308	319	95.5	96.9	9	9	5.75	F-EET	None	244
ABJ60525.1	P72367	8.A.3.2.4	gnl|BL_ORD_ID|9948 gnl|TC-DB|P72367|8.A.3.2.4 Capsular polysaccharide type 8 biosynthesis protein cap8A OS=Staphylococcus aureus GN=cap8A PE=1 SV=1	263	4.00497e-31	30	286	222	90.6	99.1	3	2	1.25	MPA1-C or MPA1+C	NONE	245
ABJ60435.1	P0AA53	8.A.21.2.2	gnl|BL_ORD_ID|7442 gnl|TC-DB|P0AA53|8.A.21.2.2 Protein QmcA OS=Escherichia coli (strain K12) GN=qmcA PE=1 SV=1	284	8.56612e-36	29	291	305	93.1	92.8	1	1	1	Stomatin	NONE	246
ABJ59437.1	G5IP47	8.A.56.2.2	gnl|BL_ORD_ID|4325 gnl|TC-DB|G5IP47|8.A.56.2.2 Uncharacterized protein OS=Enterococcus saccharolyticus 30_1 OX=742813 GN=HMPREF9478_00091 PE=4 SV=1	177	1.3161e-26	36	172	177	98.3	99.4	4	4	3.6	Wls	None	248
ABJ60628.1	C5F3G8	9.A.32.2.2	gnl|BL_ORD_ID|2338 gnl|TC-DB|C5F3G8|9.A.32.2.2 Uncharacterized protein OS=Lactobacillus paracasei subsp. paracasei 8700:2 GN=LBPG_00775 PE=4 SV=1	130	1.23747e-24	36	136	131	94.1	98.5	3	3	2.45	9.A.32	Unknown	250
ABJ59487.1	Q8EXN4	9.B.1.1.5	gnl|BL_ORD_ID|14337 gnl|TC-DB|Q8EXN4|9.B.1.1.5 Protease HtpX homolog OS=Leptospira interrogans serogroup Icterohaemorrhagiae serovar Lai (strain 56601) GN=htpX PE=3 SV=1	301	1.01884e-27	31	296	295	96.3	97.6	4	4	2.85	CAAX Protease	Unknown	251
ABJ61112.1	C7T7I3	9.B.2.1.18	gnl|BL_ORD_ID|2468 gnl|TC-DB|C7T7I3|9.B.2.1.18 Putative protease OS=Lactobacillus rhamnosus (strain ATCC 53103 / GG) GN=LRHM_2521 PE=4 SV=1	220	5.28083e-22	28	215	215	97.7	97.7	6	6	4.95	CAAX Protease2	Unknown	254
ABJ59851.1	P0ABP6	9.B.27.2.3	gnl|BL_ORD_ID|7516 gnl|TC-DB|P0ABP6|9.B.27.2.3 Protein dedA OS=Escherichia coli (strain K12) GN=dedA PE=1 SV=1	206	7.03985e-62	45	216	219	94.9	93.2	6	6	5.55	DedA	Selenite	261
ABJ60258.1	D6GX19	9.B.27.2.5	gnl|BL_ORD_ID|3019 gnl|TC-DB|D6GX19|9.B.27.2.5 SNARE associated protein OS=Candidatus Parvarchaeum acidophilus ARMAN-5 GN=BJBARM5_1043 PE=4 SV=1	188	5.4682e-32	32	203	206	90.1	86.4	4	5	3.3	DedA	Unknown	262
ABJ61051.1	BAQ24849	9.B.28.2.7	gnl|BL_ORD_ID|2063 gnl|TC-DB|BAQ24849.1|9.B.28.2.7 uncharacterized protein SRT_15880 [Streptococcus troglodytae]	224	3.33598e-42	37	200	245	95	90.6	4	4	1.3	MusI	None	263
ABJ59441.1	BAQ24849	9.B.28.2.7	gnl|BL_ORD_ID|2063 gnl|TC-DB|BAQ24849.1|9.B.28.2.7 uncharacterized protein SRT_15880 [Streptococcus troglodytae]	227	3.81251e-42	39	247	245	90.7	89.8	4	4	3.45	MusI	None	264
ABJ60436.1	BAQ24849	9.B.28.2.7	gnl|BL_ORD_ID|2063 gnl|TC-DB|BAQ24849.1|9.B.28.2.7 uncharacterized protein SRT_15880 [Streptococcus troglodytae]	239	9.99521e-29	30	269	245	87.4	96.3	6	4	3.65	MusI	None	265
ABJ61056.1	WP_084131416	9.B.28.5.1	gnl|BL_ORD_ID|18788 gnl|TC-DB|WP_084131416.1|9.B.28.5.1 hypothetical protein [Enterococcus aquimarinus]	580	1.48146e-86	32	596	598	94	95.7	7	7	6.55	MusI	None	266
ABJ60374.1	Q45064	9.B.31.1.2	gnl|BL_ORD_ID|11995 gnl|TC-DB|Q45064|9.B.31.1.2 Glycerol-3-phosphate acyltransferase OS=Bacillus subtilis (strain 168) GN=plsY PE=1 SV=1	186	4.85171e-57	51	219	193	84.5	94.3	5	5	4.75	PlsY	Unknown	268
ABJ60514.1	Q93TI8	9.B.67.8.4	gnl|BL_ORD_ID|15388 gnl|TC-DB|Q93TI8|9.B.67.8.4 Capsular biosynthesis protein CpsH OS=Streptococcus agalactiae GN=cpsIVH PE=4 SV=1	341	2.29803e-08	23	386	365	83.4	84.4	9	9	5.95	OAP	NONE	271
ABJ60511.1	Q286Z2	9.B.97.1.2	gnl|BL_ORD_ID|11594 gnl|TC-DB|Q286Z2|9.B.97.1.2 O-acetyltransferase OS=Escherichia phage phiV10 GN=oac PE=4 SV=1	340	3.45011e-25	27	340	338	94.7	96.2	10	10	7.7	ATAT	Unknown	272
ABJ60262.1	B9DIS8	9.B.97.5.1	gnl|BL_ORD_ID|1982 gnl|TC-DB|B9DIS8|9.B.97.5.1 Putative membrane protein with acyltransferase 3 family domain OS=Staphylococcus carnosus (strain TM300) GN=Sca_0581 PE=4 SV=1	641	2.68943e-102	32	646	611	98.3	97.2	11	11	8.15	ATAT	Unknown	274
ABJ60746.1	F0Z2G1	9.B.104.1.3	gnl|BL_ORD_ID|3708 gnl|TC-DB|F0Z2G1|9.B.104.1.3 Putative small hydrophobic molecule transporter protein OS=Clostridium sp. D5 GN=HMPREF0240_03287 PE=4 SV=1	193	4.07627e-29	31	228	223	82.9	85.7	7	6	5.2	Rhomboid	Unknown	275
ABJ60391.1	B8I766	9.B.105.1.5	gnl|BL_ORD_ID|1948 gnl|TC-DB|B8I766|9.B.105.1.5 Lipoprotein signal peptidase OS=Clostridium cellulolyticum (strain ATCC 35319 / DSM 5812 / JCM 6584 / H10) GN=lspA PE=3 SV=1	152	8.37147e-19	32	154	163	95.5	90.2	4	3	2.75	PbrBC	Unknown	276
ABJ60093.1	D0DT64	9.B.126.2.5	gnl|BL_ORD_ID|2616 gnl|TC-DB|D0DT64|9.B.126.2.5 YihY family protein OS=Lactobacillus fermentum 28-3-CHN GN=HMPREF0513_00853 PE=4 SV=1	275	1.23799e-48	29	307	299	89.3	89.6	7	6	4.85	YhjD	Unknown	280
ABJ59523.1	H3P2R4	9.B.141.1.2	gnl|BL_ORD_ID|4574 gnl|TC-DB|H3P2R4|9.B.141.1.2 Hypothetical membrane protein, YibE/F family OS=Lactobacillus plantarum subsp. plantarum NC8 GN=nc8_0863 PE=4 SV=1	239	8.96723e-65	43	253	254	94.1	93.7	6	6	6.15	YibE/F	Unknown	281
ABJ59522.1	C7TAQ3	9.B.141.1.3	gnl|BL_ORD_ID|2473 gnl|TC-DB|C7TAQ3|9.B.141.1.3 Uncharacterized protein OS=Lactobacillus rhamnosus (strain ATCC 53103 / GG) GN=LRHM_0777 PE=4 SV=1	322	5.15862e-54	32	360	355	89.2	88.5	7	9	6	YibE/F	Unknown	282
ABJ60381.1	Q8PUP5	9.B.143.2.3	gnl|BL_ORD_ID|14779 gnl|TC-DB|Q8PUP5|9.B.143.2.3 Putative uncharacterized protein OS=Methanosarcina mazei (strain ATCC BAA-159 / DSM 3647 / Goe1 / Go1 / JCM 11833 / OCM 88) GN=MM_2287 PE=4 SV=1	222	1.66877e-25	31	232	277	92.7	78.7	6	6	4.6	DUF1275	Unknown	285
ABJ60198.1	O31754	9.B.149.2.1	gnl|BL_ORD_ID|6077 gnl|TC-DB|O31754|9.B.149.2.1 Regulator of sigma-W protease RasP OS=Bacillus subtilis (strain 168) GN=rasP PE=1 SV=1	419	8.11411e-96	40	418	422	98.8	98.6	6	4	3.5	M50-P	None	290
ABJ60583.1	Q01466	9.B.157.1.1	gnl|BL_ORD_ID|10510 gnl|TC-DB|Q01466|9.B.157.1.1 Cell shape-determining protein MreC OS=Bacillus subtilis (strain 168) GN=mreC PE=1 SV=3	286	1.93581e-44	33	283	290	97.5	96.2	1	1	0.85	MreBCD	Folic acid	291
ABJ61107.1	C0B844	9.B.211.1.2	gnl|BL_ORD_ID|2078 gnl|TC-DB|C0B844|9.B.211.1.2 Uncharacterized protein OS=Coprococcus comes ATCC 27758 GN=COPCOM_01318 PE=4 SV=1	299	1.82016e-88	44	307	317	96.4	94	10	9	7.85	10PP	Unknown	297
ABJ59692.1	KPJ73630	9.B.252.3.6	gnl|BL_ORD_ID|5283 gnl|TC-DB|KPJ73630.1|9.B.252.3.6 hypothetical protein AMJ48_00120 [Parcubacteria bacterium DG_74_1]	248	1.95108e-13	27	225	272	95.1	89.3	8	8	5.25	UPUB6	None	302
ABJ60197.1	WP_102961726	9.B.273.1.2	gnl|BL_ORD_ID|18931 gnl|TC-DB|WP_102961726.1|9.B.273.1.2 phosphatidate cytidylyltransferase [Burkholderia cenocepacia]	290	2.26888e-27	32	263	273	98.5	98.5	8	7	6.25	PCT	None	307
ABJ59684.1	O67077	9.B.307.1.1	gnl|BL_ORD_ID|6432 gnl|TC-DB|O67077|9.B.307.1.1 ATP-dependent zinc metalloprotease FtsH OS=Aquifex aeolicus (strain VF5) OX=224324 GN=ftsH PE=1 SV=1	581	4.15947e-173	48	708	634	80.6	89.3	2	2	0.9	FtsH	None	308
ABJ60689.1	WP_063487264	9.B.330.4.2	gnl|BL_ORD_ID|18626 gnl|TC-DB|WP_063487264.1|9.B.330.4.2 prolipoprotein diacylglyceryl transferase [Lactobacillus plantarum]	254	7.56668e-90	49	278	272	91	91.2	7	7	5.15	DUF4013	None	312
ABJ60213.1	G4NXA5	1.A.33.1.4	gnl|BL_ORD_ID|4272 gnl|TC-DB|G4NXA5|1.A.33.1.4 Chaperone protein DnaK OS=Bacillus subtilis subsp. spizizenii TU-B-10 GN=dnaK PE=3 SV=1	623	0	71	623	611	99.8	99.3	1	0	None	Hsp70	ions	313
ABJ59762.1	Q9ZK21	1.C.82.1.1	gnl|BL_ORD_ID|17436 gnl|TC-DB|Q9ZK21|1.C.82.1.1 50S ribosomal protein L1 - Helicobacter pylori J99 (Campylobacter pylori J99).	224	7.51195e-86	56	230	234	97	95.3	0	0	None	HP2-20	small molecules	318
ABJ60146.1	J8IXD8	1.C.109.1.5	gnl|BL_ORD_ID|4937 gnl|TC-DB|J8IXD8|1.C.109.1.5 Hemolysin TlyA family protein OS=Bacillus cereus VD078 GN=III_01305 PE=4 SV=1	241	2.48979e-95	60	270	279	88.9	85.7	0	0	None	B-Hemolysin A	small molecules	329
ABJ61091.1	P39579	2.A.50.2.1	gnl|BL_ORD_ID|8964 gnl|TC-DB|P39579|2.A.50.2.1 D-alanyl carrier protein OS=Bacillus subtilis (strain 168) OX=224308 GN=dltC PE=1 SV=1	78	1.44718e-18	42	79	78	96.2	98.7	0	0	None	GUP	Alanine	342
ABJ60937.1	Q8TZQ3	3.A.1.1.16	gnl|BL_ORD_ID|14964 gnl|TC-DB|Q8TZQ3|3.A.1.1.16 Putative sugar transport ATP-hydrolyzing - Pyrococcus furiosus.	358	5.9681e-87	41	361	370	94.2	95.4	0	0	None	ABC	Maltooligosaccharides	351
ABJ59627.1	Q7WWQ6	3.A.1.1.20	gnl|BL_ORD_ID|13895 gnl|TC-DB|Q7WWQ6|3.A.1.1.20 ATP-binding protein MsmK - Lactobacillus acidophilus.	366	0	86	367	368	99.5	99.2	0	0	None	ABC	Fructooligosaccharides	352
ABJ59628.1	Q8DT28	3.A.1.1.27	gnl|BL_ORD_ID|14279 gnl|TC-DB|Q8DT28|3.A.1.1.27 Putative maltose/maltodextrin ABC transporter, sugar-binding protein MalX - Streptococcus mutans.	416	3.03153e-101	42	423	415	94.8	99	0	1	None	ABC	Maltose, Maltotriose, Maltotetraose, Trehalose	353
ABJ59497.1	Q9A1H1	3.A.1.3.20	gnl|BL_ORD_ID|15707 gnl|TC-DB|Q9A1H1|3.A.1.3.20 Amino acid transport ATP-binding protein OS=Streptococcus pyogenes serotype M1 GN=M5005_Spy0235 PE=4 SV=1	241	9.17614e-108	63	254	246	94.1	97.6	0	0	None	ABC	lysine	357
ABJ59942.1	Q9CES4	3.A.1.3.25	gnl|BL_ORD_ID|15848 gnl|TC-DB|Q9CES4|3.A.1.3.25 Glutamine ABC transporter ATP-binding protein OS=Lactococcus lactis subsp. lactis (strain IL1403) GN=glnQ PE=3 SV=1	244	2.22416e-101	61	244	247	99.6	98	0	0	None	ABC	glutamate, Asparagine, Glutamine	358
ABJ59764.1	Q9CES4	3.A.1.3.25	gnl|BL_ORD_ID|15848 gnl|TC-DB|Q9CES4|3.A.1.3.25 Glutamine ABC transporter ATP-binding protein OS=Lactococcus lactis subsp. lactis (strain IL1403) GN=glnQ PE=3 SV=1	214	1.07435e-64	48	215	247	96.3	85.4	0	0	None	ABC	glutamate, Asparagine, Glutamine	359
ABJ59925.1	P45769	3.A.1.3.26	gnl|BL_ORD_ID|9263 gnl|TC-DB|P45769|3.A.1.3.26 Uncharacterized amino-acid ABC transporter ATP-binding protein YhdZ OS=Escherichia coli (strain K12) GN=yhdZ PE=3 SV=1	241	4.30813e-94	56	258	252	93	95.2	0	0	None	ABC	tyrosine, Histidine, Glutamine, Threonine, Serine, Asparagine	360
ABJ60958.1	F0TFS6	3.A.1.5.32	gnl|BL_ORD_ID|3691 gnl|TC-DB|F0TFS6|3.A.1.5.32 Oligopeptide ABC transporter substrate OS=Lactobacillus acidophilus (strain 30SC) GN=LAC30SC_07290 PE=4 SV=1	469	0	67	467	583	99.8	79.6	0	1	None	ABC	Alpha-galactosides	362
ABJ60166.1	F0TFS9	3.A.1.5.32	gnl|BL_ORD_ID|3694 gnl|TC-DB|F0TFS9|3.A.1.5.32 Oligopeptide ABC transporter ATP-binding protein OS=Lactobacillus acidophilus (strain 30SC) GN=LAC30SC_07305 PE=3 SV=1	316	0	83	322	328	97.8	96	0	0	None	ABC	Alpha-galactosides	363
ABJ60165.1	F0TFT0	3.A.1.5.32	gnl|BL_ORD_ID|3695 gnl|TC-DB|F0TFT0|3.A.1.5.32 Oligopeptide ABC transporter OS=Lactobacillus acidophilus (strain 30SC) GN=LAC30SC_07310 PE=4 SV=1	334	0	90	342	342	97.4	97.4	0	0	None	ABC	Alpha-galactosides	364
ABJ59948.1	O51236	3.A.1.7.5	gnl|BL_ORD_ID|6281 gnl|TC-DB|O51236|3.A.1.7.5 Phosphate import ATP-binding protein PstB OS=Borrelia burgdorferi (strain ATCC 35210 / B31 / CIP 102532 / DSM 4680) GN=pstB PE=3 SV=1	250	6.94007e-100	55	268	260	92.9	95.8	0	0	None	ABC	phosphate	365
ABJ59947.1	O51236	3.A.1.7.5	gnl|BL_ORD_ID|6281 gnl|TC-DB|O51236|3.A.1.7.5 Phosphate import ATP-binding protein PstB OS=Borrelia burgdorferi (strain ATCC 35210 / B31 / CIP 102532 / DSM 4680) GN=pstB PE=3 SV=1	253	1.52039e-93	55	266	260	94	96.5	0	0	None	ABC	phosphate	366
ABJ59542.1	O69063	3.A.1.9.4	gnl|BL_ORD_ID|6462 gnl|TC-DB|O69063|3.A.1.9.4 Hypophosphite import ATP-binding protein HtxD OS=Pseudomonas stutzeri OX=316 GN=htxD PE=3 SV=1	247	2.09662e-66	45	261	341	94.3	71.8	0	0	None	ABC	None	368
ABJ60655.1	Q97Q42	3.A.1.11.7	gnl|BL_ORD_ID|15588 gnl|TC-DB|Q97Q42|3.A.1.11.7 Spermidine/putrescine import ATP-binding protein PotA OS=Streptococcus pneumoniae serotype 4 (strain ATCC BAA-334 / TIGR4) GN=potA PE=3 SV=1	357	6.35997e-156	62	367	385	96.7	92.5	0	0	None	ABC	Spermidine, Putrescine	369
ABJ60096.1	Q93A35	3.A.1.12.8	gnl|BL_ORD_ID|15317 gnl|TC-DB|Q93A35|3.A.1.12.8 BilEA - Listeria monocytogenes.	239	1.78993e-78	51	320	328	73.8	72.6	0	0	None	ABC	Glycine betaine, Proline	370
ABJ60234.1	Q8K8K8	3.A.1.24.3	gnl|BL_ORD_ID|14568 gnl|TC-DB|Q8K8K8|3.A.1.24.3 Methionine import ATP-binding protein metN OS=Streptococcus pyogenes serotype M3 GN=metN PE=3 SV=1	350	9.11605e-109	50	349	354	97.7	98.6	0	0	None	ABC	Methionine	371
ABJ59724.1	Q03PY5	3.A.1.26.9	gnl|BL_ORD_ID|10644 gnl|TC-DB|Q03PY5|3.A.1.26.9 Energy-coupling factor transporter ATP-binding protein EcfA1 OS=Lactobacillus brevis (strain ATCC 367 / JCM 1170) GN=ecfA1 PE=3 SV=1	277	2.82987e-98	51	285	279	96.8	97.8	0	0	None	ABC	folate	372
ABJ59725.1	Q839D4	3.A.1.26.10	gnl|BL_ORD_ID|14009 gnl|TC-DB|Q839D4|3.A.1.26.10 Cobalt import ATP-binding protein CbiO 2 OS=Enterococcus faecalis GN=cbiO2 PE=3 SV=2	286	1.06601e-108	52	288	289	98.6	98.6	0	0	None	ABC	Folic acid	373
ABJ60856.1	Q74I62	3.A.1.29.1	gnl|BL_ORD_ID|13589 gnl|TC-DB|Q74I62|3.A.1.29.1 Putative ABC transporter ATP-binding protein LJ_1704 OS=Lactobacillus johnsonii GN=LJ_1704 PE=3 SV=1	573	0	88	573	573	99.8	99.8	0	0	None	ABC	Methionine precursors	374
ABJ59484.1	O34362	3.A.1.30.1	gnl|BL_ORD_ID|6131 gnl|TC-DB|O34362|3.A.1.30.1 Putative HMP/thiamine import ATP-binding protein ykoD OS=Bacillus subtilis GN=ykoD PE=1 SV=1	500	2.77557e-59	28	450	547	98.2	90.5	0	0	None	ABC	Thiamin precursors	375
ABJ60209.1	P39115	3.A.1.121.3	gnl|BL_ORD_ID|8924 gnl|TC-DB|P39115|3.A.1.121.3 Nucleotide binding protein expZ - Bacillus subtilis.	497	3.58582e-52	26	501	547	98	85.7	0	0	None	ABC	Virginiamymycin, Lincomycin	377
ABJ61045.1	Q58206	3.A.1.122.14	gnl|BL_ORD_ID|12564 gnl|TC-DB|Q58206|3.A.1.122.14 Uncharacterized ABC transporter ATP-binding protein MJ0796 OS=Methanocaldococcus jannaschii (strain ATCC 43067 / DSM 2661 / JAL-1 / JCM 10045 / NBRC 100440) GN=MJ0796 PE=1 SV=1	223	3.93598e-54	44	225	235	96.4	94.5	0	1	None	ABC	Unknown	378
ABJ60851.1	Q18BL2	3.A.1.124.6	gnl|BL_ORD_ID|11263 gnl|TC-DB|Q18BL2|3.A.1.124.6 ABC-type transport system,lantibiotic/multidrug-family ATP-binding protein OS=Peptoclostridium difficile (strain 630) GN=cprA PE=4 SV=1	223	7.89763e-67	45	234	235	94.9	94.5	0	1	None	ABC	Antimicrobial peptides	379
ABJ60479.1	Q99ZC8	3.A.1.132.6	gnl|BL_ORD_ID|15694 gnl|TC-DB|Q99ZC8|3.A.1.132.6 ABC transporter ATP-binding protein OS=Streptococcus pyogenes serotype M1 GN=M5005_Spy0992 PE=4 SV=1	228	4.24062e-43	33	243	232	93.4	95.3	0	0	None	ABC	Unknown	382
ABJ60982.1	Q8Y5F0	3.A.1.134.12	gnl|BL_ORD_ID|15128 gnl|TC-DB|Q8Y5F0|3.A.1.134.12 Lmo2114 protein OS=Listeria monocytogenes serovar 1/2a (strain ATCC BAA-679 / EGD-e) GN=lmo2114 PE=4 SV=1	249	5.36915e-93	53	248	255	98.8	96.9	0	0	None	ABC	Beta-lactam antibiotics, Nisin, Gallidermin, Bacitracin	383
ABJ60454.1	Q6MGV5	3.A.1.137.2	gnl|BL_ORD_ID|13198 gnl|TC-DB|Q6MGV5|3.A.1.137.2 ABC-type anti-microbial peptide transporter, ATP-binding protein OS=Bdellovibrio bacteriovorus (strain ATCC 15356 / DSM 50701 / NCIB 9529 / HD100) GN=Bd3816 PE=4 SV=1	227	5.64096e-78	50	236	237	95.8	95.4	0	1	None	ABC	Antimicrobial peptides	384
ABJ60321.1	P77279	3.A.1.139.2	gnl|BL_ORD_ID|10103 gnl|TC-DB|P77279|3.A.1.139.2 Probable iron export ATP-binding protein FetA OS=Escherichia coli (strain K12) GN=fetA PE=1 SV=1	205	3.69618e-67	49	212	225	95.8	90.7	0	0	None	ABC	Fe2+	385
ABJ60802.1	P55339	3.A.1.143.1	gnl|BL_ORD_ID|9633 gnl|TC-DB|P55339|3.A.1.143.1 ABC-type transporter ATP-binding protein EcsA OS=Bacillus subtilis (strain 168) GN=ecsA PE=1 SV=1	240	3.43124e-77	49	248	247	96.4	96.4	0	0	None	ABC	proteins	386
ABJ59807.1	ANC59923	3.A.1.211.25	gnl|BL_ORD_ID|1278 gnl|TC-DB|ANC59923.1|3.A.1.211.25 OptrA [Enterococcus faecalis]	637	5.85532e-121	31	643	639	97.5	97.5	0	0	None	ABC	None	388
ABJ60999.1	ANC59923	3.A.1.211.25	gnl|BL_ORD_ID|1278 gnl|TC-DB|ANC59923.1|3.A.1.211.25 OptrA [Enterococcus faecalis]	514	9.43591e-85	31	515	639	96.5	79.8	0	0	None	ABC	None	389
ABJ60609.1	P50000	3.A.2.1.5	gnl|BL_ORD_ID|9430 gnl|TC-DB|P50000|3.A.2.1.5 ATP synthase subunit alpha, sodium ion specific OS=Acetobacterium woodii (strain ATCC 29683 / DSM 1030 / JCM 2381 / KCTC 1655) GN=atpA PE=3 SV=3	504	0	63	506	502	98.8	99.6	0	0	None	F-ATPase	Na+	390
ABJ60607.1	P50002	3.A.2.1.5	gnl|BL_ORD_ID|9431 gnl|TC-DB|P50002|3.A.2.1.5 ATP synthase subunit beta, sodium ion specific OS=Acetobacterium woodii (strain ATCC 29683 / DSM 1030 / JCM 2381 / KCTC 1655) GN=atpD PE=1 SV=3	461	0	71	480	466	95.8	98.3	1	0	None	F-ATPase	Na+	391
ABJ60608.1	P50005	3.A.2.1.5	gnl|BL_ORD_ID|9432 gnl|TC-DB|P50005|3.A.2.1.5 ATP synthase gamma chain, sodium ion specific OS=Acetobacterium woodii (strain ATCC 29683 / DSM 1030 / JCM 2381 / KCTC 1655) GN=atpG PE=1 SV=3	334	3.05179e-46	27	318	302	99.4	99.3	0	0	None	F-ATPase	Na+	392
ABJ60610.1	Q9RMB3	3.A.2.1.5	gnl|BL_ORD_ID|16758 gnl|TC-DB|Q9RMB3|3.A.2.1.5 ATP synthase subunit delta OS=Acetobacterium woodii GN=atpH PE=3 SV=1	172	2.52284e-30	35	182	180	93.4	94.4	0	0	None	F-ATPase	Na+	393
ABJ60176.1	P0AGD7	3.A.5.1.1	gnl|BL_ORD_ID|7644 gnl|TC-DB|P0AGD7|3.A.5.1.1 Signal recognition particle protein - Escherichia coli.	447	9.07912e-146	48	476	453	93.1	98.5	0	0	None	Sec	proteins	395
ABJ60173.1	P10121	3.A.5.1.1	gnl|BL_ORD_ID|7749 gnl|TC-DB|P10121|3.A.5.1.1 CELL DIVISION PROTEIN FTSY - Escherichia coli.	453	2.14747e-86	39	449	497	95.8	89.9	0	0	None	Sec	proteins	396
ABJ60693.1	Q6MR29	3.A.5.1.3	gnl|BL_ORD_ID|13260 gnl|TC-DB|Q6MR29|3.A.5.1.3 Protein translocase subunit SecA OS=Bdellovibrio bacteriovorus (strain ATCC 15356 / DSM 50701 / NCIB 9529 / HD100) GN=secA PE=3 SV=1	844	0	47	799	889	99.1	91.1	1	0	None	Sec	proteins	397
ABJ61030.1	Q5EP68	3.A.7.11.1	gnl|BL_ORD_ID|12663 gnl|TC-DB|Q5EP68|3.A.7.11.1 ParA - Neisseria gonorrhoeae.	251	9.72933e-15	27	257	295	92.2	84.4	0	1	None	IVSP	DNA	399
ABJ60555.1	Q6MDD6	3.A.7.16.1	gnl|BL_ORD_ID|13186 gnl|TC-DB|Q6MDD6|3.A.7.16.1 Putative exodeoxyribonuclease V OS=Protochlamydia amoebophila (strain UWE25) GN=recD PE=4 SV=1	690	3.69435e-117	35	792	721	84.7	92.4	0	0	None	IVSP	DNA	400
ABJ59425.1	Q5G3M3	3.A.7.19.1	gnl|BL_ORD_ID|12694 gnl|TC-DB|Q5G3M3|3.A.7.19.1 Single-stranded DNA-binding protein OS=Enterococcus faecalis GN=pcfS PE=3 SV=1	173	5.00052e-55	50	172	150	99.4	99.3	0	0	None	IVSP	DNA	401
ABJ60212.1	P38523	3.A.8.1.1	gnl|BL_ORD_ID|8881 gnl|TC-DB|P38523|3.A.8.1.1 GrpE protein homolog, mitochondrial precursor - Saccharomyces cerevisiae (Baker's yeast).	182	4.35187e-18	31	192	228	90.1	78.1	0	0	None	MPT	proteins	402
ABJ59689.1	Q9SXJ7	3.A.9.1.2	gnl|BL_ORD_ID|16898 gnl|TC-DB|Q9SXJ7|3.A.9.1.2 Chaperone protein ClpC2, chloroplastic OS=Arabidopsis thaliana GN=CLPC2 PE=2 SV=1	812	0	48	838	952	95.5	84.5	0	0	None	CEPT or Tic-Toc	proteins	404
ABJ61084.1	Q9SXJ7	3.A.9.1.2	gnl|BL_ORD_ID|16898 gnl|TC-DB|Q9SXJ7|3.A.9.1.2 Chaperone protein ClpC2, chloroplastic OS=Arabidopsis thaliana GN=CLPC2 PE=2 SV=1	653	0	46	705	952	87.5	68	0	0	None	CEPT or Tic-Toc	proteins	405
ABJ60725.1	Q9FI56	3.A.9.1.2	gnl|BL_ORD_ID|15971 gnl|TC-DB|Q9FI56|3.A.9.1.2 Chaperone protein ClpC1, chloroplastic OS=Arabidopsis thaliana GN=CLPC1 PE=1 SV=1	639	0	51	722	929	84.8	68.7	0	0	None	CEPT or Tic-Toc	proteins	406
ABJ60696.1	Q8CWM9	3.A.11.1.2	gnl|BL_ORD_ID|14227 gnl|TC-DB|Q8CWM9|3.A.11.1.2 Involved in transformation; required for DNA uptake but not for binding; Related to ATP-dependent RNA/DNA helicases - Streptococcus pneumoniae (strain ATCC BAA-255 / R6).	407	1.03405e-85	41	425	432	93.6	92.8	0	0	None	DNA-T	ssDNA	407
ABJ59612.1	G2JTB4	3.A.11.1.4	gnl|BL_ORD_ID|4202 gnl|TC-DB|G2JTB4|3.A.11.1.4 ComE operon protein 2 OS=Listeria monocytogenes J0161 GN=LMOG_00216 PE=3 SV=1	145	4.29398e-54	51	162	186	88.9	77.4	0	0	None	DNA-T	ssDNA	408
ABJ60695.1	G2JSZ8	3.A.11.1.4	gnl|BL_ORD_ID|4200 gnl|TC-DB|G2JSZ8|3.A.11.1.4 Competence protein ComFC OS=Listeria monocytogenes J0161 GN=LMOG_02351 PE=4 SV=1	227	6.21771e-29	33	223	218	99.6	99.5	0	0	None	DNA-T	ssDNA	409
ABJ60162.1	AKM80112	3.A.11.1.5	gnl|BL_ORD_ID|1201 gnl|TC-DB|AKM80112|3.A.11.1.5 putative ATP-dependent DNA helicase [Candidatus Saccharibacteria bacterium GW2011_GWC2_44_17]	661	1.55443e-139	39	679	676	95.3	96.2	3	0	None	DNA-T	None	410
ABJ60304.1	AKM80915	3.A.11.1.5	gnl|BL_ORD_ID|1237 gnl|TC-DB|AKM80915.1|3.A.11.1.5 hypothetical protein UW38_C0001G1085 [Candidatus Saccharibacteria bacterium GW2011_GWC2_44_17]	184	6.87197e-43	44	281	285	64.8	64.2	0	0	None	DNA-T	None	413
ABJ60638.1	G2JS07	3.A.14.1.2	gnl|BL_ORD_ID|4199 gnl|TC-DB|G2JS07|3.A.14.1.2 Competence protein ComGA OS=Listeria monocytogenes J0161 GN=LMOG_00362 PE=4 SV=1	269	2.73558e-63	43	356	340	73.3	78.8	0	0	None	FPE	proteins	415
ABJ59673.1	P38919	3.A.18.1.1	gnl|BL_ORD_ID|8907 gnl|TC-DB|P38919|3.A.18.1.1 Eukaryotic initiation factor 4A-III - Homo sapiens (Human).	355	1.50398e-93	42	485	411	72.8	86.1	0	0	None	3.A.18	mRNA	418
ABJ60671.1	B3ET62	3.A.23.6.1	gnl|BL_ORD_ID|1640 gnl|TC-DB|B3ET62|3.A.23.6.1 Glyceraldehyde-3-phosphate dehydrogenase OS=Amoebophilus asiaticus (strain 5a2) GN=Aasi_1069 PE=3 SV=1	336	6.14665e-93	48	338	331	97.9	97.9	0	0	None	T6SS	None	421
ABJ60492.1	B3ERW3	3.A.23.6.1	gnl|BL_ORD_ID|1638 gnl|TC-DB|B3ERW3|3.A.23.6.1 Uncharacterized protein OS=Amoebophilus asiaticus (strain 5a2) GN=Aasi_0564 PE=4 SV=1	314	1.12876e-78	38	319	314	94.7	95.9	0	0	None	T6SS	None	422
ABJ60674.1	O97252	3.A.26.1.1	gnl|BL_ORD_ID|6740 gnl|TC-DB|O97252|3.A.26.1.1 ATP-dependent Clp protease proteolytic subunit OS=Plasmodium falciparum (isolate 3D7) GN=PF3D7_0307400 PE=1 SV=1	172	1.43003e-52	52	195	370	87.7	45.9	2	0	None	PTEX	proteins	423
ABJ60164.1	O80800	3.D.1.6.3	gnl|BL_ORD_ID|6551 gnl|TC-DB|O80800|3.D.1.6.3 Acyl carrier protein - Arabidopsis thaliana (Mouse-ear cress).	78	7.63384e-19	41	85	126	90.6	61.1	0	0	None	NDH	H+	428
ABJ60380.1	F4K2G0	3.D.1.8.1	gnl|BL_ORD_ID|3840 gnl|TC-DB|F4K2G0|3.D.1.8.1 Peptidyl-prolyl cis-trans isomerase OS=Arabidopsis thaliana GN=CYP20-2 PE=3 SV=1	171	2.0032e-38	49	195	255	84.6	55.3	0	0	None	NDH	H+	429
ABJ59748.1	Q045X4	4.A.3.1.2	gnl|BL_ORD_ID|10671 gnl|TC-DB|Q045X4|4.A.3.1.2 PTS system lactose-specific IIA component, Lac family OS=Lactobacillus gasseri (strain ATCC 33323 / DSM 20243) GN=LGAS_0342 PE=4 SV=1	119	8.05884e-80	100	119	119	99.2	99.2	0	0	None	Lac	Lactose	432
ABJ59898.1	Q045H4	4.A.3.1.3	gnl|BL_ORD_ID|10669 gnl|TC-DB|Q045H4|4.A.3.1.3 Cellobiose-specific PTS system IIA component OS=Lactobacillus gasseri (strain ATCC 33323 / DSM 20243) GN=LGAS_0500 PE=4 SV=1	118	7.48376e-80	100	118	118	99.2	99.2	0	0	None	Lac	Lactose	433
ABJ59605.1	Q9CIF0	4.A.3.2.4	gnl|BL_ORD_ID|15853 gnl|TC-DB|Q9CIF0|4.A.3.2.4 Cellobiose-specific PTS system IIB component - Lactococcus lactis subsp. lactis (Streptococcus lactis).	107	5.51657e-36	56	107	108	96.3	98.1	0	0	None	Lac	Cellobiose	434
ABJ59603.1	Q9CIE9	4.A.3.2.4	gnl|BL_ORD_ID|15852 gnl|TC-DB|Q9CIE9|4.A.3.2.4 Cellobiose-specific PTS system IIA component - Lactococcus lactis subsp. lactis (Streptococcus lactis).	101	3.94914e-33	57	108	116	92.6	86.2	0	0	None	Lac	Cellobiose	435
ABJ61082.1	Q04GK1	4.A.6.1.10	gnl|BL_ORD_ID|10688 gnl|TC-DB|Q04GK1|4.A.6.1.10 Phosphotransferase system, mannose/fructose-specific component IIA OS=Oenococcus oeni (strain BAA-331 / PSU-1) GN=OEOE_0464 PE=4 SV=1	326	1.18439e-155	65	332	331	97.9	97.6	0	1	None	Man	glucose, fructose	438
ABJ59529.1	B3W754	4.A.6.1.18	gnl|BL_ORD_ID|1694 gnl|TC-DB|B3W754|4.A.6.1.18 Phosphotransferase system sugar-specific EIIB component OS=Lactobacillus casei (strain BL23) GN=PTS-EIIB PE=4 SV=1	159	1.19108e-62	59	162	160	97.5	98.8	0	0	None	Man	Galacto-N-biose, Lacto-N-biose, N-acetyl galactosamine	439
ABJ59532.1	B3W757	4.A.6.1.18	gnl|BL_ORD_ID|1697 gnl|TC-DB|B3W757|4.A.6.1.18 Phosphotransferase system sugar-specific EII component OS=Lactobacillus casei (strain BL23) GN=PTS-EII PE=4 SV=1	124	3.34457e-40	52	132	126	93.2	96	0	0	None	Man	Galacto-N-biose, Lacto-N-biose, N-acetyl galactosamine	440
ABJ59912.1	B3W754	4.A.6.1.18	gnl|BL_ORD_ID|1694 gnl|TC-DB|B3W754|4.A.6.1.18 Phosphotransferase system sugar-specific EIIB component OS=Lactobacillus casei (strain BL23) GN=PTS-EIIB PE=4 SV=1	148	2.08776e-28	34	164	160	89.6	91.9	0	0	None	Man	Galacto-N-biose, Lacto-N-biose, N-acetyl galactosamine	441
ABJ59915.1	V7IHL6	4.A.6.1.19	gnl|BL_ORD_ID|18084 gnl|TC-DB|V7IHL6|4.A.6.1.19 PTS system fructose IIA component OS=Salmonella enterica subsp. enterica serovar Cubana str. 76814 GN=A628_05230 PE=4 SV=1	140	7.02617e-25	31	143	140	96.5	98.6	0	0	None	Man	Glucoselysine, Fructoselysine	442
ABJ61093.1	Q42524	4.C.1.1.7	gnl|BL_ORD_ID|11971 gnl|TC-DB|Q42524|4.C.1.1.7 4-coumarate--CoA ligase 1 - Arabidopsis thaliana (Mouse-ear cress).	520	2.87713e-18	23	502	561	94.6	88.4	0	1	None	FAT	fatty acids	443
ABJ59757.1	Q8Y433	5.B.14.1.1	gnl|BL_ORD_ID|15119 gnl|TC-DB|Q8Y433|5.B.14.1.1 Lmo2641 protein OS=Listeria monocytogenes serovar 1/2a (strain ATCC BAA-679 / EGD-e) OX=169963 GN=lmo2641 PE=3 SV=1	327	2.20025e-75	40	338	326	95	97.2	0	1	None	F-EET	None	447
ABJ61034.1	Q8Y437	5.B.14.1.1	gnl|BL_ORD_ID|15123 gnl|TC-DB|Q8Y437|5.B.14.1.1 FAD:protein FMN transferase OS=Listeria monocytogenes serovar 1/2a (strain ATCC BAA-679 / EGD-e) OX=169963 GN=lmo2636 PE=3 SV=1	263	2.41945e-65	42	308	360	84.1	72.2	0	1	None	F-EET	None	448
ABJ60524.1	P39851	8.A.3.2.1	gnl|BL_ORD_ID|8998 gnl|TC-DB|P39851|8.A.3.2.1 CAPB protein - Staphylococcus aureus.	217	8.45243e-49	39	257	228	84	92.1	0	0	None	MPA1-C or MPA1+C	NONE	450
ABJ60903.1	P80874	8.A.5.1.4	gnl|BL_ORD_ID|10186 gnl|TC-DB|P80874|8.A.5.1.4 General stress protein 69 OS=Bacillus subtilis (strain 168) GN=yhdN PE=1 SV=2	322	1.36318e-23	28	285	331	94.4	93.1	0	0	None	KTN	NONE	452
ABJ60722.1	P08839	8.A.7.1.1	gnl|BL_ORD_ID|7300 gnl|TC-DB|P08839|8.A.7.1.1 PHOSPHOENOLPYRUVATE-PROTEIN PHOSPHOTRANSFERASE (EC 2.7.3.9) (PHOSPHOTRANSFERASE SYSTEM, ENZYME I) - Escherichia coli.	575	0	49	579	575	98.8	99.5	1	0	None	EI	NONE	455
ABJ60723.1	H1XXZ0	8.A.8.1.5	gnl|BL_ORD_ID|4509 gnl|TC-DB|H1XXZ0|8.A.8.1.5 Phosphotransferase system, phosphocarrier protein HPr OS=Caldithrix abyssi DSM 13497 GN=Calab_1239 PE=4 SV=1	82	2.2005e-17	43	88	89	92	91	0	0	None	HPr	NONE	456
ABJ59688.1	WP_121250785	9.B.111.1.5	gnl|BL_ORD_ID|19005 gnl|TC-DB|WP_121250785|9.B.111.1.5 lysine--tRNA ligase [Solirubrobacter pauli]	467	2.012e-135	47	504	909	92.5	49.1	0	2	None	LysS	None	476
ABJ60604.1	Q01465	9.B.157.1.1	gnl|BL_ORD_ID|10509 gnl|TC-DB|Q01465|9.B.157.1.1 Rod shape-determining protein MreB OS=Bacillus subtilis (strain 168) GN=mreB PE=3 SV=3	324	1.7991e-119	52	329	337	97.6	95.8	0	1	None	MreBCD	Folic acid	478
ABJ60584.1	Q9K8H5	9.B.157.1.2	gnl|BL_ORD_ID|16278 gnl|TC-DB|Q9K8H5|9.B.157.1.2 Cell-shape determining protein OS=Bacillus halodurans (strain ATCC BAA-125 / DSM 18197 / FERM 7344 / JCM 9153 / C-125) GN=mreB PE=4 SV=1	337	9.8208e-154	64	333	346	99.4	96.5	0	1	None	MreBCD	Folic acid	479
ABJ60790.1	F2MU33	9.B.158.1.3	gnl|BL_ORD_ID|3764 gnl|TC-DB|F2MU33|9.B.158.1.3 Copper homeostasis protein CutC OS=Enterococcus faecalis (strain ATCC 47077 / OG1RF) GN=cutC PE=4 SV=1	211	4.46728e-70	51	214	209	98.1	99.5	0	0	None	Cut	Cu2+	481
ABJ60229.1	Q83XH1	9.B.325.1.1	gnl|BL_ORD_ID|14016 gnl|TC-DB|Q83XH1|9.B.325.1.1 ABC transporter - Clostridium hathewayi.	527	0	58	540	546	97.4	95.6	0	0	None	ABC4	None	486

## Sheet: Paracasei
Query ID	Hit ID	Hit TCID	Hit Description	Match Len	e-Val	% Identity	Query Length	Hit Length	Query Coverage	Hit Coverage	Query TMS#	Hit TMS#	TM-Overlap Score	Family Abrv.	Predicted Substrate
ABJ59768.1	Q8Y5K1	1.A.1.17.2	gnl|BL_ORD_ID|15129 gnl|TC-DB|Q8Y5K1|1.A.1.17.2 Lmo2059 protein OS=Listeria monocytogenes GN=lmo2059 PE=4 SV=1	264	9.61115e-20	25	292	247	89	96.8	6	6	3.35	VIC	K+
ABJ59878.1	D7VEY8	1.A.8.2.7	gnl|BL_ORD_ID|3106 gnl|TC-DB|D7VEY8|1.A.8.2.7 MIP family glycerol uptake facilitator protein GlpF OS=Lactobacillus plantarum subsp. plantarum ATCC 14917 GN=glpF4 PE=3 SV=1	250	9.72199e-127	67	289	250	86.2	99.2	7	6	5.65	MIP	water, Dihydroxyacetone, glycerol
ABJ60370.1	A3CPR5	1.A.14.2.6	gnl|BL_ORD_ID|391 gnl|TC-DB|A3CPR5|1.A.14.2.6 Integral membrane protein, possible receptor, putative OS=Streptococcus sanguinis (strain SK36) GN=SSA_1788 PE=4 SV=1	220	1.51105e-42	33	244	227	89.8	96	7	7	5.45	CaTA	Unknown
ABJ60858.1	A3CPR5	1.A.14.2.6	gnl|BL_ORD_ID|391 gnl|TC-DB|A3CPR5|1.A.14.2.6 Integral membrane protein, possible receptor, putative OS=Streptococcus sanguinis (strain SK36) GN=SSA_1788 PE=4 SV=1	220	2.00771e-39	32	243	227	90.1	96	7	7	6.5	CaTA	Unknown
ABJ60949.1	P94585	1.A.22.1.3	gnl|BL_ORD_ID|10317 gnl|TC-DB|P94585|1.A.22.1.3 Large-conductance mechanosensitive channel - Bacillus subtilis.	128	6.73892e-39	50	125	130	99.2	96.9	2	2	1.9	MscL	ions, Osmolytes
ABJ59837.1	O34897	1.A.23.3.1	gnl|BL_ORD_ID|6159 gnl|TC-DB|O34897|1.A.23.3.1 YKUT PROTEIN - Bacillus subtilis.	257	7.90749e-37	33	298	267	80.5	91.4	2	2	1.5	MscS	Osmolytes
ABJ60647.1	O07591	1.A.43.1.2	gnl|BL_ORD_ID|5835 gnl|TC-DB|O07591|1.A.43.1.2 Protein CrcB homolog 2 OS=Bacillus subtilis (strain 168) GN=crcB2 PE=3 SV=1	120	4.72067e-13	37	129	131	88.4	88.5	4	4	3.2	Fluc	Camphor, Fl-
ABJ60646.1	F6CB17	1.A.43.1.14	gnl|BL_ORD_ID|3899 gnl|TC-DB|F6CB17|1.A.43.1.14 Putative fluoride ion transporter CrcB OS=Lactobacillus kefiranofaciens (strain ZW3) GN=crcB PE=3 SV=1	119	1.81667e-43	58	120	124	93.3	95.2	4	4	3	Fluc	Fl-
ABJ59962.1	T1Y8N2	1.A.112.2.10	gnl|BL_ORD_ID|17867 gnl|TC-DB|T1Y8N2|1.A.112.2.10 Magnesium and cobalt efflux protein corC OS=Staphylococcus aureus subsp. aureus CN1 OX=1193576 GN=SAKOR_00699 PE=4 SV=1	458	1.16568e-78	33	459	449	99.3	99.8	4	4	3.15	CNNM	None
ABJ60808.1	E3DLQ2	1.C.105.2.9	gnl|BL_ORD_ID|3309 gnl|TC-DB|E3DLQ2|1.C.105.2.9 Putative uncharacterized protein OS=Halanaerobium praevalens (strain ATCC 33744 / DSM 2228 / GSL) GN=Hprae_1098 PE=4 SV=1	870	3.74551e-28	23	812	872	98.6	96.4	2	2	0.65	Vip3	small molecules
ABJ60298.1	P54176	1.C.113.1.1	gnl|BL_ORD_ID|9577 gnl|TC-DB|P54176|1.C.113.1.1 HEMOLYSIN III (HLY-III) - Bacillus cereus.	206	8.51947e-67	48	221	219	92.8	93.6	7	7	6.35	Hly III	small molecules
ABJ60025.1	D0R3Q7	1.E.26.9.1	gnl|BL_ORD_ID|2648 gnl|TC-DB|D0R3Q7|1.E.26.9.1 Holin OS=Lactobacillus johnsonii (strain FI9785) GN=ps145 PE=4 SV=1	96	1.1853e-09	34	143	114	66.4	83.3	1	1	0.9	Holin LLH	endolysin
ABJ60086.1	D0R3Q7	1.E.26.9.1	gnl|BL_ORD_ID|2648 gnl|TC-DB|D0R3Q7|1.E.26.9.1 Holin OS=Lactobacillus johnsonii (strain FI9785) GN=ps145 PE=4 SV=1	96	1.1853e-09	34	143	114	66.4	83.3	1	1	0.9	Holin LLH	endolysin
ABJ59448.1	J8Z3M3	1.E.43.1.9	gnl|BL_ORD_ID|4942 gnl|TC-DB|J8Z3M3|1.E.43.1.9 Uncharacterized protein OS=Bacillus cereus HD73 PE=4 SV=1	75	2.92885e-21	51	88	82	84.1	90.2	3	3	2.4	T-A Hol	endolysin
ABJ61158.1	Q46909	2.A.1.1.95	gnl|BL_ORD_ID|12074 gnl|TC-DB|Q46909|2.A.1.1.95 Inner membrane metabolite transport protein ygcS OS=Escherichia coli (strain K12) GN=ygcS PE=1 SV=2	421	1.13492e-64	29	447	445	93.3	92.6	12	12	10.6	MFS	Metabolites
ABJ59907.1	P25744	2.A.1.2.20	gnl|BL_ORD_ID|8291 gnl|TC-DB|P25744|2.A.1.2.20 Hypothetical transport protein yceE - Escherichia coli.	395	9.36675e-131	49	403	408	97.5	96.1	12	12	10.25	MFS	fosfomycin, Fluoroquinolones
ABJ61061.1	P25744	2.A.1.2.20	gnl|BL_ORD_ID|8291 gnl|TC-DB|P25744|2.A.1.2.20 Hypothetical transport protein yceE - Escherichia coli.	382	1.62404e-113	43	404	408	94.3	93.4	12	12	10.35	MFS	fosfomycin, Fluoroquinolones
ABJ61088.1	O34546	2.A.1.2.69	gnl|BL_ORD_ID|6138 gnl|TC-DB|O34546|2.A.1.2.69 Uncharacterized MFS-type transporter yttB OS=Bacillus subtilis (strain 168) GN=yttB PE=3 SV=1	381	1.99651e-86	36	416	397	89.9	93.5	12	12	11.1	MFS	Unknown, NONE
ABJ59556.1	O34546	2.A.1.2.69	gnl|BL_ORD_ID|6138 gnl|TC-DB|O34546|2.A.1.2.69 Uncharacterized MFS-type transporter yttB OS=Bacillus subtilis (strain 168) GN=yttB PE=3 SV=1	359	2.49704e-61	33	438	397	80.6	87.9	13	12	10.55	MFS	Unknown, NONE
ABJ60784.1	O35018	2.A.1.3.30	gnl|BL_ORD_ID|6173 gnl|TC-DB|O35018|2.A.1.3.30 Lincomycin resistance protein lmrB - Bacillus subtilis.	463	7.37291e-94	36	464	479	96.8	96.5	14	14	12.05	MFS	None
ABJ59855.1	O32182	2.A.1.3.33	gnl|BL_ORD_ID|6098 gnl|TC-DB|O32182|2.A.1.3.33 Uncharacterized MFS-type transporter yusP OS=Bacillus subtilis GN=yusP PE=3 SV=1	517	1.3962e-86	31	487	541	99.6	95.4	14	14	10.85	MFS	Novobiocin, Streptomycin, Actinomycin D
ABJ59880.1	P96712	2.A.1.3.50	gnl|BL_ORD_ID|10349 gnl|TC-DB|P96712|2.A.1.3.50 Multidrug resistance protein 3 OS=Bacillus subtilis (strain 168) GN=bmr3 PE=1 SV=1	441	4.53824e-67	30	497	512	87.5	83	14	14	10.05	MFS	drugs
ABJ59879.1	P96712	2.A.1.3.50	gnl|BL_ORD_ID|10349 gnl|TC-DB|P96712|2.A.1.3.50 Multidrug resistance protein 3 OS=Bacillus subtilis (strain 168) GN=bmr3 PE=1 SV=1	485	7.81486e-67	29	492	512	94.7	93.6	14	14	11.3	MFS	drugs
ABJ60116.1	I7QYF9	2.A.1.3.75	gnl|BL_ORD_ID|4875 gnl|TC-DB|I7QYF9|2.A.1.3.75 Major facilitator superfamily protein OS=Streptococcus canis FSL Z3-227 GN=SCAZ3_10115 PE=3 SV=1	483	4.48027e-156	48	490	499	96.1	96.6	14	14	9.35	MFS	None
ABJ59756.1	Q9I0P8	2.A.1.11.8	gnl|BL_ORD_ID|16192 gnl|TC-DB|Q9I0P8|2.A.1.11.8 Uncharacterized protein OS=Pseudomonas aeruginosa (strain ATCC 15692 / PAO1 / 1C / PRS 101 / LMG 12228) GN=PA2589 PE=4 SV=1	389	6.13299e-34	28	415	404	92.3	94.3	12	12	10.45	MFS	Unknown
ABJ60353.1	Q7BKK4	2.A.1.21.22	gnl|BL_ORD_ID|13663 gnl|TC-DB|Q7BKK4|2.A.1.21.22 Macrolide efflux protein E OS=Streptococcus pneumoniae GN=mefE PE=4 SV=1	407	2.66333e-57	30	410	405	98.5	98.3	12	12	9.8	MFS	erythromycin, LL-37
ABJ59470.1	P97039	2.A.1.23.2	gnl|BL_ORD_ID|10357 gnl|TC-DB|P97039|2.A.1.23.2 Putative bile salt transporter - Lactobacillus johnsonii.	451	0	94	451	451	99.8	99.8	12	12	12.4	MFS	Cholate, taurocholate
ABJ60740.1	C2UR80	2.A.1.46.5	gnl|BL_ORD_ID|2190 gnl|TC-DB|C2UR80|2.A.1.46.5 Quinolone resistence protein, major facilitator family transporter OS=Bacillus cereus Rock3-28 GN=bcere0019_7170 PE=4 SV=1	383	5.80329e-36	24	389	407	97.2	93.6	12	12	11.45	MFS	Quinolone
ABJ60125.1	Q04DP6	2.A.1.68.1	gnl|BL_ORD_ID|10684 gnl|TC-DB|Q04DP6|2.A.1.68.1 Permease of the major facilitator superfamily OS=Oenococcus oeni (strain BAA-331 / PSU-1) GN=OEOE_1574 PE=4 SV=1	390	3.3542e-108	42	401	403	94.5	96	12	12	11.4	MFS	glucose
ABJ61077.1	P27837	2.A.3.1.15	gnl|BL_ORD_ID|8347 gnl|TC-DB|P27837|2.A.3.1.15 Probable transport protein YifK OS=Escherichia coli (strain K12) GN=yifK PE=1 SV=4	452	6.85705e-167	52	463	461	96.8	96.3	12	12	10.25	APC	Unknown
ABJ61078.1	P27837	2.A.3.1.15	gnl|BL_ORD_ID|8347 gnl|TC-DB|P27837|2.A.3.1.15 Probable transport protein YifK OS=Escherichia coli (strain K12) GN=yifK PE=1 SV=4	454	1.37774e-166	52	463	461	97	97.4	12	12	10.7	APC	Unknown
ABJ59515.1	P96704	2.A.3.1.16	gnl|BL_ORD_ID|10347 gnl|TC-DB|P96704|2.A.3.1.16 Uncharacterized transporter YdgF OS=Bacillus subtilis (strain 168) GN=ydgF PE=3 SV=1	450	2.9951e-171	52	449	458	99.6	98	12	12	11	APC	Unknown
ABJ61071.1	Q8R706	2.A.3.3.22	gnl|BL_ORD_ID|14809 gnl|TC-DB|Q8R706|2.A.3.3.22 Amino acid transporters OS=Caldanaerobacter subterraneus subsp. tengcongensis (strain DSM 15242 / JCM 11007 / NBRC 100824 / MB4) GN=PotE6 PE=4 SV=1	463	7.42769e-128	42	462	475	98.3	97.1	12	13	8.55	APC	Amino acids
ABJ60256.1	Q8R706	2.A.3.3.22	gnl|BL_ORD_ID|14809 gnl|TC-DB|Q8R706|2.A.3.3.22 Amino acid transporters OS=Caldanaerobacter subterraneus subsp. tengcongensis (strain DSM 15242 / JCM 11007 / NBRC 100824 / MB4) GN=PotE6 PE=4 SV=1	461	8.55221e-27	24	450	475	96.9	92.4	12	13	7.4	APC	Amino acids
ABJ61083.1	s6ex81	2.A.3.3.23	gnl|BL_ORD_ID|17737 gnl|TC-DB|s6ex81|2.A.3.3.23 Branched-chain amino acid permease OS=Lactococcus lactis subsp. lactis A12 GN=bcaP PE=4 SV=1	467	4.63683e-131	44	465	469	98.5	98.3	12	12	10.65	APC	Leucine, Isoleucine, Valine
ABJ59462.1	O30417	2.A.3.7.1	gnl|BL_ORD_ID|6025 gnl|TC-DB|O30417|2.A.3.7.1 AMINO ACID ANTIPORTER GADC (ORFX) - Lactococcus lactis (subsp. lactis) (Streptococcus lactis).	459	1.90366e-106	36	494	503	92.5	90.9	11	12	10.85	APC	Gamma-aminobutyrate, glutamate
ABJ60673.1	P75835	2.A.3.7.2	gnl|BL_ORD_ID|10025 gnl|TC-DB|P75835|2.A.3.7.2 Inner membrane transporter ycaM OS=Escherichia coli (strain K12) GN=ycaM PE=1 SV=2	471	7.11915e-143	45	516	476	89.5	97.5	13	12	10.85	APC	glutamate, Gamma-aminobutyric acid
ABJ60983.1	P75835	2.A.3.7.2	gnl|BL_ORD_ID|10025 gnl|TC-DB|P75835|2.A.3.7.2 Inner membrane transporter ycaM OS=Escherichia coli (strain K12) GN=ycaM PE=1 SV=2	472	1.31407e-122	38	480	476	97.7	98.7	12	12	10.7	APC	glutamate, Gamma-aminobutyric acid
ABJ61154.1	P75835	2.A.3.7.2	gnl|BL_ORD_ID|10025 gnl|TC-DB|P75835|2.A.3.7.2 Inner membrane transporter ycaM OS=Escherichia coli (strain K12) GN=ycaM PE=1 SV=2	464	6.3361e-118	38	492	476	93.7	97.1	12	12	10.75	APC	glutamate, Gamma-aminobutyric acid
ABJ60219.1	P39282	2.A.3.7.5	gnl|BL_ORD_ID|8937 gnl|TC-DB|P39282|2.A.3.7.5 Inner membrane transporter yjeM OS=Escherichia coli (strain K12) GN=yjeM PE=1 SV=2	487	5.99395e-144	43	502	500	96.4	96.6	12	12	10.95	APC	Unknown
ABJ59964.1	O34739	2.A.3.8.12	gnl|BL_ORD_ID|6148 gnl|TC-DB|O34739|2.A.3.8.12 YkbA protein - Bacillus subtilis.	437	5.51547e-107	39	452	438	95.1	97.3	12	12	10.85	APC	Serine, Threonine, tyrosine, tryptophan, phenylalanine, Histidine
ABJ59670.1	O07002	2.A.3.11.1	gnl|BL_ORD_ID|5816 gnl|TC-DB|O07002|2.A.3.11.1 Hypothetical protein yvea - Bacillus subtilis.	479	6.9713e-90	34	491	520	96.1	89.6	13	14	9.25	APC	aspartate, glutamate, L-aspartate hydroxamate
ABJ59735.1	O07084	2.A.4.1.3	gnl|BL_ORD_ID|5820 gnl|TC-DB|O07084|2.A.4.1.3 Cation transport protein YRDO - Bacillus subtilis.	261	2.12991e-59	39	294	311	87.4	83.6	5	5	4.8	CDF	Cd2+, Zn2+, H+, K+
ABJ60735.1	Q6MMK1	2.A.6.6.11	gnl|BL_ORD_ID|13241 gnl|TC-DB|Q6MMK1|2.A.6.6.11 3-hydroxy-3-methylglutaryl coenzyme A reductase OS=Bdellovibrio bacteriovorus (strain ATCC 15356 / DSM 50701 / NCIB 9529 / HD100) GN=Bd1627 PE=3 SV=1	423	7.91685e-74	38	429	438	92.8	94.5	2	1	0	RND	Electrons
ABJ60959.1	KRN20350	2.A.7.3.79	gnl|BL_ORD_ID|5289 gnl|TC-DB|KRN20350.1|2.A.7.3.79 DMT family permease [Lactobacillus similis DSM 23365 = JCM 2765]	285	2.05152e-73	42	309	313	90.9	89.8	10	10	9.15	DMT	None
ABJ61072.1	KRN20350	2.A.7.3.79	gnl|BL_ORD_ID|5289 gnl|TC-DB|KRN20350.1|2.A.7.3.79 DMT family permease [Lactobacillus similis DSM 23365 = JCM 2765]	283	7.88785e-70	42	297	313	94.3	89.5	10	10	9.35	DMT	None
ABJ60415.1	Q9X4M3	2.A.7.5.2	gnl|BL_ORD_ID|17220 gnl|TC-DB|Q9X4M3|2.A.7.5.2 PUTATIVE RIBOSE TRANSPORTER RBSU - Lactobacillus sakei.	296	1.10587e-111	52	296	294	99.7	99.3	10	10	9	DMT	Ribose
ABJ59584.1	Q9X4M3	2.A.7.5.2	gnl|BL_ORD_ID|17220 gnl|TC-DB|Q9X4M3|2.A.7.5.2 PUTATIVE RIBOSE TRANSPORTER RBSU - Lactobacillus sakei.	283	1.46844e-56	36	287	294	96.2	94.9	10	10	8.55	DMT	Ribose
ABJ61170.1	Q01625	2.A.9.3.2	gnl|BL_ORD_ID|10517 gnl|TC-DB|Q01625|2.A.9.3.2 Stage III sporulation protein J precursor - Bacillus subtilis.	258	6.04946e-69	39	291	261	88.3	95.8	6	6	4.7	YidC/Alb3/Oxa1	proteins
ABJ59919.1	Q5M4H8	2.A.17.1.6	gnl|BL_ORD_ID|12763 gnl|TC-DB|Q5M4H8|2.A.17.1.6 Di-or tripeptide:H+ symporter OS=Streptococcus thermophilus (strain ATCC BAA-250 / LMG 18311) GN=dtpT PE=3 SV=1	491	0	58	498	483	98.2	98.8	13	14	8.65	POT/PTR	dipeptides, tripeptides
ABJ60952.1	P54596	2.A.23.1.4	gnl|BL_ORD_ID|9598 gnl|TC-DB|P54596|2.A.23.1.4 Hypothetical symporter yhcL - Bacillus subtilis.	461	7.61066e-156	50	480	463	95	98.9	12	11	9.95	DAACS	Selenocystine, Cystine, H+
ABJ59465.1	F2HK99	2.A.26.1.9	gnl|BL_ORD_ID|3747 gnl|TC-DB|F2HK99|2.A.26.1.9 BrnQ protein OS=Lactococcus lactis subsp. lactis (strain CV56) GN=brnQ PE=4 SV=1	438	1.67676e-130	45	454	456	96.3	95.8	12	12	11.05	LIVCS	Branched amino acids
ABJ60336.1	F2HK99	2.A.26.1.9	gnl|BL_ORD_ID|3747 gnl|TC-DB|F2HK99|2.A.26.1.9 BrnQ protein OS=Lactococcus lactis subsp. lactis (strain CV56) GN=brnQ PE=4 SV=1	448	3.57116e-127	43	475	456	93.1	98	12	12	10.6	LIVCS	Branched amino acids
ABJ60852.1	Q838N7	2.A.35.1.3	gnl|BL_ORD_ID|14005 gnl|TC-DB|Q838N7|2.A.35.1.3 Na+/H+ antiporter - Enterococcus faecalis (Streptococcus faecalis).	451	6.44096e-180	55	458	467	98	96.4	12	13	10.1	NhaC	tyrosine
ABJ61102.1	P26235	2.A.37.2.1	gnl|BL_ORD_ID|8304 gnl|TC-DB|P26235|2.A.37.2.1 NA(+)/H(+) ANTIPORTER - Enterococcus hirae.	387	1.07247e-121	49	386	383	99.5	99.7	13	13	10.8	CPA2	Na+, H+
ABJ59888.1	Q9CF78	2.A.40.1.2	gnl|BL_ORD_ID|15850 gnl|TC-DB|Q9CF78|2.A.40.1.2 Uracil permease - Lactococcus lactis (subsp. lactis) (Streptococcus lactis).	426	6.70843e-179	59	443	430	93	98.4	12	13	8.45	NAT/NCS2	Uracil
ABJ59637.1	P42086	2.A.40.3.1	gnl|BL_ORD_ID|9118 gnl|TC-DB|P42086|2.A.40.3.1 XANTHINE PERMEASE - Bacillus subtilis.	433	3.59369e-153	51	442	438	97.3	98.4	12	13	9.75	NAT/NCS2	Xanthine
ABJ61139.1	O34987	2.A.40.7.2	gnl|BL_ORD_ID|6167 gnl|TC-DB|O34987|2.A.40.7.2 Hypoxanthine/guanine permease (Hypothetical protein) - Bacillus subtilis.	435	4.68105e-165	54	436	440	97.5	98.6	12	12	7.9	NAT/NCS2	Hypoxanthine, Guanosine
ABJ61141.1	O34987	2.A.40.7.2	gnl|BL_ORD_ID|6167 gnl|TC-DB|O34987|2.A.40.7.2 Hypoxanthine/guanine permease (Hypothetical protein) - Bacillus subtilis.	436	7.1105e-162	52	455	440	93.6	98.9	12	12	7.8	NAT/NCS2	Hypoxanthine, Guanosine
ABJ61143.1	O34987	2.A.40.7.2	gnl|BL_ORD_ID|6167 gnl|TC-DB|O34987|2.A.40.7.2 Hypoxanthine/guanine permease (Hypothetical protein) - Bacillus subtilis.	434	3.10923e-156	51	438	440	96.8	98.2	12	12	7.9	NAT/NCS2	Hypoxanthine, Guanosine
ABJ59904.1	Q6D017	2.A.47.3.4	gnl|BL_ORD_ID|13078 gnl|TC-DB|Q6D017|2.A.47.3.4 Putative sodium:sulfate symporter - Erwinia carotovora subsp. atroseptica (Pectobacterium atrosepticum).	478	6.38948e-125	37	479	484	97.3	98.1	15	12	9.55	DASS	Citrate
ABJ59791.1	A8ALD3	2.A.49.5.5	gnl|BL_ORD_ID|823 gnl|TC-DB|A8ALD3|2.A.49.5.5 H(+)/Cl(-) exchange transporter ClcA OS=Citrobacter koseri (strain ATCC BAA-895 / CDC 4225-83 / SGSC4696) GN=clcA PE=3 SV=1	444	1.28692e-48	28	457	473	91.2	87.3	11	11	9.8	ClC	H+, Cl-
ABJ61092.1	P39580	2.A.50.2.1	gnl|BL_ORD_ID|8965 gnl|TC-DB|P39580|2.A.50.2.1 Protein dltB - Bacillus subtilis.	398	4.48619e-124	49	407	395	96.1	97.5	10	12	7.1	GUP	Alanine
ABJ60512.1	Q8KUK6	2.A.66.2.16	gnl|BL_ORD_ID|14593 gnl|TC-DB|Q8KUK6|2.A.66.2.16 CpsU OS=Streptococcus thermophilus GN=cpsU PE=4 SV=1	466	5.23982e-167	51	475	471	97.9	98.7	14	14	11.4	MOP	Capsular polysaccharides
ABJ60876.1	Q8KUK6	2.A.66.2.16	gnl|BL_ORD_ID|14593 gnl|TC-DB|Q8KUK6|2.A.66.2.16 CpsU OS=Streptococcus thermophilus GN=cpsU PE=4 SV=1	461	3.92931e-77	31	478	471	94.8	96.4	14	14	11.75	MOP	Capsular polysaccharides
ABJ59876.1	E0SFK1	2.A.69.3.2	gnl|BL_ORD_ID|3202 gnl|TC-DB|E0SFK1|2.A.69.3.2 Transporter OS=Dickeya dadantii (strain 3937) GN=Dda3937_03046 PE=4 SV=1	305	1.32026e-18	22	313	318	93.6	92.8	10	10	8.1	AEC	malate
ABJ59565.1	Q9CHU5	2.A.72.1.3	gnl|BL_ORD_ID|15851 gnl|TC-DB|Q9CHU5|2.A.72.1.3 Probable potassium transport system protein kup 1 OS=Lactococcus lactis subsp. lactis (strain IL1403) GN=kup1 PE=3 SV=1	653	0	53	682	670	95.5	96.6	13	11	9.9	KUP	K+
ABJ60239.1	G7U9U2	2.A.79.1.3	gnl|BL_ORD_ID|4354 gnl|TC-DB|G7U9U2|2.A.79.1.3 Putative uncharacterized protein OS=Propionibacterium acnes ATCC 11828 GN=TIIST44_11145 PE=4 SV=1	402	3.33697e-60	33	458	440	86.7	89.1	9	10	7.2	ThrE	Threonine
ABJ60998.1	Q73PT4	2.A.79.1.5	gnl|BL_ORD_ID|13535 gnl|TC-DB|Q73PT4|2.A.79.1.5 Membrane protein, putative OS=Treponema denticola (strain ATCC 35405 / CIP 103919 / DSM 14222) GN=TDE_0712 PE=4 SV=1	263	1.68532e-37	33	260	260	99.2	99.6	6	5	4.15	ThrE	Glycine, Alanine
ABJ60997.1	W4C0M8	2.A.79.1.7	gnl|BL_ORD_ID|18155 gnl|TC-DB|W4C0M8|2.A.79.1.7 Uncharacterized protein OS=Paenibacillus sp. FSL H8-237 GN=C171_23415 PE=4 SV=1	136	8.9165e-27	35	156	142	86.5	94.4	5	5	4	ThrE	Unknown
ABJ60709.1	O32095	2.A.86.1.8	gnl|BL_ORD_ID|6089 gnl|TC-DB|O32095|2.A.86.1.8 UPF0118 membrane protein yueF OS=Bacillus subtilis GN=yueF PE=3 SV=1	344	7.63192e-72	35	393	369	87.3	92.4	8	8	8.3	2.A.86	Unknown
ABJ60873.1	Q03YI6	2.A.87.2.1	gnl|BL_ORD_ID|10653 gnl|TC-DB|Q03YI6|2.A.87.2.1 Pantothenate transporter PanT OS=Leuconostoc mesenteroides subsp. mesenteroides (strain ATCC 8293 / NCDO 523) GN=panT PE=1 SV=1	207	3.17422e-24	34	222	204	90.5	97.1	6	6	6.55	2.A.87	Pantothenate
ABJ61132.1	P0AD30	2.A.102.3.1	gnl|BL_ORD_ID|7535 gnl|TC-DB|P0AD30|2.A.102.3.1 Inner membrane protein yfcA - Escherichia coli.	252	3.44756e-20	23	253	269	99.2	92.2	8	9	6.55	TSUP	Unknown
ABJ60601.1	P0ABG7	2.A.103.1.2	gnl|BL_ORD_ID|7499 gnl|TC-DB|P0ABG7|2.A.103.1.2 Rod shape-determining protein rodA - Escherichia coli.	398	4.22559e-46	32	398	370	97.2	98.1	9	9	4.9	MPE	Lipid II
ABJ60549.1	P07373	2.A.103.1.3	gnl|BL_ORD_ID|7247 gnl|TC-DB|P07373|2.A.103.1.3 STAGE V SPORULATION PROTEIN E - Bacillus subtilis.	376	7.80507e-64	35	394	366	94.2	96.2	10	10	5.9	MPE	Lipid II
ABJ59501.1	B5UIP4	2.A.109.1.3	gnl|BL_ORD_ID|1770 gnl|TC-DB|B5UIP4|2.A.109.1.3 Putative tellurium resistance protein OS=Bacillus cereus AH1134 GN=BCAH1134_0458 PE=4 SV=1	256	4.09693e-67	45	260	263	98.1	93.5	7	7	5.4	TerC	Unknown
ABJ60496.1	P39803	2.A.115.1.1	gnl|BL_ORD_ID|8990 gnl|TC-DB|P39803|2.A.115.1.1 UPF0750 membrane protein yitT OS=Bacillus subtilis (strain 168) GN=yitT PE=3 SV=2	273	1.35599e-72	40	292	280	93.2	96.8	5	5	4.1	NbcE	Novobiocin
ABJ60296.1	P94357	2.A.115.1.2	gnl|BL_ORD_ID|10298 gnl|TC-DB|P94357|2.A.115.1.2 UPF0750 membrane protein YxkD OS=Bacillus subtilis (strain 168) GN=yxkD PE=3 SV=1	280	6.53864e-50	32	296	278	93.2	97.5	5	5	4.5	NbcE	Unknown
ABJ59950.1	Q38YQ0	2.A.118.1.7	gnl|BL_ORD_ID|11821 gnl|TC-DB|Q38YQ0|2.A.118.1.7 Putative transport protein OS=Lactobacillus sakei subsp. sakei (strain 23K) GN=LCA_0376 PE=4 SV=1	513	1.42217e-141	41	512	519	98.8	97.9	13	13	10.15	ArcD	Citruline, Ornithine
ABJ59629.1	Q8DT27	3.A.1.1.27	gnl|BL_ORD_ID|14278 gnl|TC-DB|Q8DT27|3.A.1.1.27 Putative maltose/maltodextrin ABC transporter, permease protein MalF - Streptococcus mutans.	446	2.92413e-158	54	451	453	97.6	97.1	8	8	8.9	ABC	Maltose, Maltotriose, Maltotetraose, Trehalose
ABJ59630.1	Q8DT26	3.A.1.1.27	gnl|BL_ORD_ID|14277 gnl|TC-DB|Q8DT26|3.A.1.1.27 Putative maltose/maltodextrin ABC transporter, MalG permease - Streptococcus mutans.	270	2.20164e-102	56	285	278	94	95.3	6	6	5.8	ABC	Maltose, Maltotriose, Maltotetraose, Trehalose
ABJ60935.1	Q5SLB5	3.A.1.1.50	gnl|BL_ORD_ID|12828 gnl|TC-DB|Q5SLB5|3.A.1.1.50 Sugar ABC transporter, permease protein OS=Thermus thermophilus (strain HB8 / ATCC 27634 / DSM 579) GN=TTHA0378 PE=3 SV=1	218	1.72893e-52	37	276	378	78.6	57.4	6	5	4.75	ABC	glycerophosphocholine
ABJ60936.1	Q5SLB6	3.A.1.1.50	gnl|BL_ORD_ID|12829 gnl|TC-DB|Q5SLB6|3.A.1.1.50 Sugar ABC transporter, permease protein OS=Thermus thermophilus (strain HB8 / ATCC 27634 / DSM 579) GN=TTHA0377 PE=3 SV=1	295	2.56788e-52	35	287	299	94.1	97	6	7	3.6	ABC	glycerophosphocholine
ABJ61122.1	Q8DU36	3.A.1.2.12	gnl|BL_ORD_ID|14280 gnl|TC-DB|Q8DU36|3.A.1.2.12 Putative ABC transporter - Streptococcus mutans.	351	2.80471e-84	40	357	349	98	98.9	1	1	0	ABC	Deoxyribonucleosides
ABJ59928.1	A1VZQ3	3.A.1.3.16	gnl|BL_ORD_ID|294 gnl|TC-DB|A1VZQ3|3.A.1.3.16 Amino acid ABC transporter, permease protein PEB1 - Campylobacter jejuni subsp. jejuni serotype O:23/36 (strain 81-176).	199	2.23783e-39	33	216	250	91.7	78.8	5	5	4.2	ABC	aspartate, glutamate
ABJ59926.1	Q0P9X8	3.A.1.3.16	gnl|BL_ORD_ID|10952 gnl|TC-DB|Q0P9X8|3.A.1.3.16 Major cell-binding factor - Campylobacter jejuni.	255	2.18457e-35	31	277	259	90.3	96.5	1	1	0.5	ABC	aspartate, glutamate
ABJ59498.1	Q9A1H0	3.A.1.3.20	gnl|BL_ORD_ID|15706 gnl|TC-DB|Q9A1H0|3.A.1.3.20 Putative glutamine-binding periplasmic protein OS=Streptococcus pyogenes serotype M1 GN=SPy_0277 PE=4 SV=1	521	2.52785e-168	49	537	522	95.5	98.5	6	5	4.45	ABC	lysine
ABJ59765.1	Q8RCC4	3.A.1.3.27	gnl|BL_ORD_ID|14819 gnl|TC-DB|Q8RCC4|3.A.1.3.27 ABC-type amino acid transport system, periplasmic component OS=Caldanaerobacter subterraneus subsp. tengcongensis (strain DSM 15242 / JCM 11007 / NBRC 100824 / MB4) GN=ArtI PE=3 SV=1	264	6.60451e-38	27	263	260	98.9	98.8	1	1	0.85	ABC	Glutamine, glutamate, Asparagine
ABJ60169.1	F0TFS6	3.A.1.5.32	gnl|BL_ORD_ID|3691 gnl|TC-DB|F0TFS6|3.A.1.5.32 Oligopeptide ABC transporter substrate OS=Lactobacillus acidophilus (strain 30SC) GN=LAC30SC_07290 PE=4 SV=1	585	0	74	605	583	96.4	99.8	1	1	0.9	ABC	Alpha-galactosides
ABJ60170.1	F0TFS5	3.A.1.5.32	gnl|BL_ORD_ID|3690 gnl|TC-DB|F0TFS5|3.A.1.5.32 Oligopeptide ABC trasporter substrate binding protein OS=Lactobacillus acidophilus (strain 30SC) GN=LAC30SC_07285 PE=4 SV=1	590	0	76	590	590	99	99.8	1	1	0.9	ABC	Alpha-galactosides
ABJ60167.1	F0TFS8	3.A.1.5.32	gnl|BL_ORD_ID|3693 gnl|TC-DB|F0TFS8|3.A.1.5.32 Oligopeptide transport protein OS=Lactobacillus acidophilus (strain 30SC) GN=LAC30SC_07300 PE=3 SV=1	320	0	81	320	319	99.7	99.7	6	6	6.45	ABC	Alpha-galactosides
ABJ60119.1	F0TFS6	3.A.1.5.32	gnl|BL_ORD_ID|3691 gnl|TC-DB|F0TFS6|3.A.1.5.32 Oligopeptide ABC transporter substrate OS=Lactobacillus acidophilus (strain 30SC) GN=LAC30SC_07290 PE=4 SV=1	578	0	55	591	583	97	98.3	1	1	0.9	ABC	Alpha-galactosides
ABJ60168.1	F0TFS7	3.A.1.5.32	gnl|BL_ORD_ID|3692 gnl|TC-DB|F0TFS7|3.A.1.5.32 Oligopeptide ABC transporter, permease protein OS=Lactobacillus acidophilus (strain 30SC) GN=LAC30SC_07295 PE=3 SV=1	300	9.82903e-173	78	304	310	98.4	96.5	5	6	5.15	ABC	Alpha-galactosides
ABJ59945.1	O51234	3.A.1.7.5	gnl|BL_ORD_ID|6279 gnl|TC-DB|O51234|3.A.1.7.5 Phosphate ABC transporter, permease protein PstC OS=Borrelia burgdorferi (strain ATCC 35210 / B31 / CIP 102532 / DSM 4680) GN=pstC PE=3 SV=1	281	1.32105e-59	41	331	302	81.9	92.1	6	6	4.85	ABC	phosphate
ABJ59543.1	P16683	3.A.1.9.1	gnl|BL_ORD_ID|7982 gnl|TC-DB|P16683|3.A.1.9.1 Phosphonates transport system permease protein phnE - Escherichia coli.	257	8.44642e-47	34	289	259	88.6	98.1	6	6	4.85	ABC	Fe3+
ABJ59544.1	Q119I8	3.A.1.9.3	gnl|BL_ORD_ID|11046 gnl|TC-DB|Q119I8|3.A.1.9.3 Phosphonate ABC transporter, inner membrane subunit OS=Trichodesmium erythraeum (strain IMS101) OX=203124 GN=Tery_0367 PE=3 SV=1	273	4.16421e-45	32	270	272	97.4	97.8	6	6	5.5	ABC	None
ABJ59541.1	Q119I9	3.A.1.9.3	gnl|BL_ORD_ID|11047 gnl|TC-DB|Q119I9|3.A.1.9.3 Phosphonate ABC transporter, periplasmic phosphonate-binding protein OS=Trichodesmium erythraeum (strain IMS101) OX=203124 GN=Tery_0366 PE=1 SV=1	301	1.01216e-25	24	309	298	96.8	94.3	1	1	0.8	ABC	None
ABJ61121.1	Q119I9	3.A.1.9.3	gnl|BL_ORD_ID|11047 gnl|TC-DB|Q119I9|3.A.1.9.3 Phosphonate ABC transporter, periplasmic phosphonate-binding protein OS=Trichodesmium erythraeum (strain IMS101) OX=203124 GN=Tery_0366 PE=1 SV=1	297	8.99515e-22	25	310	298	95.5	93	1	1	0.85	ABC	None
ABJ60652.1	Q97Q45	3.A.1.11.7	gnl|BL_ORD_ID|15591 gnl|TC-DB|Q97Q45|3.A.1.11.7 Spermidine/putrescine ABC transporter, spermidine/putrescine-binding protein OS=Streptococcus pneumoniae serotype 4 (strain ATCC BAA-334 / TIGR4) GN=potD PE=4 SV=1	355	1.93319e-145	57	357	356	99.2	99.2	1	1	0.85	ABC	Spermidine, Putrescine
ABJ60654.1	Q97Q43	3.A.1.11.7	gnl|BL_ORD_ID|15589 gnl|TC-DB|Q97Q43|3.A.1.11.7 Spermidine/putrescine ABC transporter, permease protein OS=Streptococcus pneumoniae serotype 4 (strain ATCC BAA-334 / TIGR4) GN=potH PE=3 SV=1	266	4.14596e-110	59	270	275	97	96.4	6	6	5.8	ABC	Spermidine, Putrescine
ABJ60653.1	Q97Q44	3.A.1.11.7	gnl|BL_ORD_ID|15590 gnl|TC-DB|Q97Q44|3.A.1.11.7 Spermidine/putrescine ABC transporter, permease protein OS=Streptococcus pneumoniae serotype 4 (strain ATCC BAA-334 / TIGR4) GN=potC PE=3 SV=1	252	1.34972e-105	61	265	257	94.7	97.3	6	7	6.3	ABC	Spermidine, Putrescine
ABJ60097.1	Q93A34	3.A.1.12.8	gnl|BL_ORD_ID|15316 gnl|TC-DB|Q93A34|3.A.1.12.8 BilEB - Listeria monocytogenes.	503	5.73144e-170	50	516	504	97.3	97.2	6	6	5.55	ABC	Glycine betaine, Proline
ABJ61008.1	O33704	3.A.1.15.3	gnl|BL_ORD_ID|6118 gnl|TC-DB|O33704|3.A.1.15.3 ADCB PROTEIN - Streptococcus pneumoniae.	259	6.57556e-31	27	263	268	96.6	95.5	7	7	6.55	ABC	Zn2+
ABJ61010.1	Q9KIJ3	3.A.1.15.20	gnl|BL_ORD_ID|16297 gnl|TC-DB|Q9KIJ3|3.A.1.15.20 Metal ABC transporter substrate-binding lipoprotein OS=Streptococcus mutans serotype c (strain ATCC 700610 / UA159) OX=210007 GN=sloC PE=3 SV=2	312	4.32637e-27	28	308	306	92.5	98	1	2	0.9	ABC	None
ABJ60233.1	Q8K8K9	3.A.1.24.3	gnl|BL_ORD_ID|14569 gnl|TC-DB|Q8K8K9|3.A.1.24.3 Putative lipoprotein (Putative uncharacterized protein SPs1626) OS=Streptococcus pyogenes serotype M3 GN=atmB PE=4 SV=1	260	2.63527e-81	50	284	281	87.3	91.8	1	1	0.7	ABC	Methionine
ABJ60235.1	Q04MS5	3.A.1.24.6	gnl|BL_ORD_ID|10690 gnl|TC-DB|Q04MS5|3.A.1.24.6 ABC transporter, permease protein, putative OS=Streptococcus pneumoniae serotype 2 (strain D39 / NCTC 7466) GN=SPD_0154 PE=3 SV=1	231	8.04965e-95	60	233	230	98.7	99.6	5	5	4.95	ABC	peptides
ABJ60279.1	Q8Y5W0	3.A.1.25.8	gnl|BL_ORD_ID|15131 gnl|TC-DB|Q8Y5W0|3.A.1.25.8 Riboflavin transporter OS=Listeria monocytogenes serovar 1/2a (strain ATCC BAA-679 / EGD-e) GN=lmo1945 PE=3 SV=1	191	2.4967e-36	35	205	203	92.2	90.6	5	5	5.15	ABC	None
ABJ59783.1	Q03S56	3.A.1.26.9	gnl|BL_ORD_ID|10651 gnl|TC-DB|Q03S56|3.A.1.26.9 Uncharacterized protein OS=Lactobacillus brevis (strain ATCC 367 / JCM 1170) GN=LVIS_0823 PE=4 SV=1	162	2.00278e-42	40	180	177	89.4	89.8	5	5	4.65	ABC	folate
ABJ59726.1	I7BV49	3.A.1.26.10	gnl|BL_ORD_ID|4836 gnl|TC-DB|I7BV49|3.A.1.26.10 Energy-coupling factor transporter transmembrane protein EcfT OS=Enterococcus faecalis D32 GN=ecfT PE=3 SV=1	266	3.71477e-105	55	267	264	99.3	99.6	6	6	4.95	ABC	Folic acid
ABJ60857.1	Q74I61	3.A.1.29.1	gnl|BL_ORD_ID|13588 gnl|TC-DB|Q74I61|3.A.1.29.1 ABC transporter permease component OS=Lactobacillus johnsonii GN=LJ_1705 PE=4 SV=1	276	0	96	293	276	93.9	99.6	7	6	5.2	ABC	Methionine precursors
ABJ60855.1	Q74I63	3.A.1.29.1	gnl|BL_ORD_ID|13590 gnl|TC-DB|Q74I63|3.A.1.29.1 UPF0397 protein LJ_1703 OS=Lactobacillus johnsonii GN=LJ_1703 PE=3 SV=1	185	1.04936e-125	95	185	185	99.5	99.5	5	5	5.4	ABC	Methionine precursors
ABJ59485.1	Q97RS4	3.A.1.30.2	gnl|BL_ORD_ID|15595 gnl|TC-DB|Q97RS4|3.A.1.30.2 Putative uncharacterized protein OS=Streptococcus pneumoniae serotype 4 (strain ATCC BAA-334 / TIGR4) GN=SP_0719 PE=4 SV=1	175	7.12762e-46	41	194	186	89.7	93.5	4	4	2.7	ABC	thiamin
ABJ59483.1	Q97RS2	3.A.1.30.2	gnl|BL_ORD_ID|15593 gnl|TC-DB|Q97RS2|3.A.1.30.2 Putative uncharacterized protein OS=Streptococcus pneumoniae serotype 4 (strain ATCC BAA-334 / TIGR4) GN=SP_0721 PE=4 SV=1	218	1.73237e-17	29	217	216	97.2	95.4	6	6	4	ABC	thiamin
ABJ59667.1	Q99ZY4	3.A.1.34.1	gnl|BL_ORD_ID|15696 gnl|TC-DB|Q99ZY4|3.A.1.34.1 ABC transporter permease protein OS=Streptococcus pyogenes serotype M1 GN=M5005_Spy0745 PE=4 SV=1	284	1.48088e-101	54	308	289	90.9	96.2	9	8	6.8	ABC	tryptophan
ABJ59668.1	Q99ZY3	3.A.1.34.1	gnl|BL_ORD_ID|15695 gnl|TC-DB|Q99ZY3|3.A.1.34.1 Putative ABC transporter (ATP-binding protein) OS=Streptococcus pyogenes serotype M1 GN=SPy_1019 PE=4 SV=1	253	1.53542e-83	53	254	252	99.2	99.6	1	1	1	ABC	tryptophan
ABJ59666.1	Q99ZY6	3.A.1.34.1	gnl|BL_ORD_ID|15697 gnl|TC-DB|Q99ZY6|3.A.1.34.1 ABC transporter substrate-binding protein OS=Streptococcus pyogenes serotype M1 GN=M5005_Spy0743 PE=4 SV=1	305	3.41889e-66	35	347	332	87.6	91	1	1	0.6	ABC	tryptophan
ABJ60187.1	O07550	3.A.1.106.8	gnl|BL_ORD_ID|5831 gnl|TC-DB|O07550|3.A.1.106.8 Probable multidrug resistance ABC transporter ATP-binding/permease protein yheI OS=Bacillus subtilis GN=yheI PE=1 SV=1	581	4.75973e-166	44	588	585	98	97.8	6	6	5.95	ABC	doxorubicin, mitoxantrone, ethidium, Hoechst 33342
ABJ60188.1	O07549	3.A.1.106.8	gnl|BL_ORD_ID|5830 gnl|TC-DB|O07549|3.A.1.106.8 Probable multidrug resistance ABC transporter ATP-binding/permease protein yheH OS=Bacillus subtilis GN=yheH PE=1 SV=1	514	3.77047e-128	40	597	673	85.4	75.9	5	6	3.65	ABC	doxorubicin, mitoxantrone, ethidium, Hoechst 33342
ABJ59842.1	Q0P9C4	3.A.1.106.15	gnl|BL_ORD_ID|10948 gnl|TC-DB|Q0P9C4|3.A.1.106.15 Protein glycosylation K OS=Campylobacter jejuni subsp. jejuni serotype O:2 (strain ATCC 700819 / NCTC 11168) GN=pglK PE=1 SV=1	467	5.621e-45	25	544	564	84.2	81.6	5	5	3.9	ABC	lipids
ABJ60431.1	Q0P9C4	3.A.1.106.15	gnl|BL_ORD_ID|10948 gnl|TC-DB|Q0P9C4|3.A.1.106.15 Protein glycosylation K OS=Campylobacter jejuni subsp. jejuni serotype O:2 (strain ATCC 700819 / NCTC 11168) GN=pglK PE=1 SV=1	519	2.90623e-36	25	525	564	95.6	85.6	5	5	1.8	ABC	lipids
ABJ59816.1	P33116	3.A.1.111.2	gnl|BL_ORD_ID|8590 gnl|TC-DB|P33116|3.A.1.111.2 Subtilin transport ATP-binding protein spaT - Bacillus subtilis.	586	6.92763e-78	27	587	614	97.8	94.6	5	5	4.55	ABC	Subtilin
ABJ61046.1	H2GZC4	3.A.1.122.11	gnl|BL_ORD_ID|4542 gnl|TC-DB|H2GZC4|3.A.1.122.11 ABC transporter system involved in hemin toxicity inner membrane protein OS=Corynebacterium diphtheriae (strain ATCC 27012 / C7 (beta)) GN=hrtB PE=4 SV=1	353	5.70436e-24	25	350	344	99.7	98.5	4	4	2.9	ABC	Hemin
ABJ61114.1	Q03RZ6	3.A.1.122.13	gnl|BL_ORD_ID|10650 gnl|TC-DB|Q03RZ6|3.A.1.122.13 ABC-type antimicrobial peptide transport system, ATPase component - Lactobacillus brevis (strain ATCC 367 / JCM 1170)	782	1.42606e-83	28	779	667	99.7	99.4	3	5	0	ABC	Antimicrobial peptides
ABJ60850.1	O52853	3.A.1.124.2	gnl|BL_ORD_ID|6300 gnl|TC-DB|O52853|3.A.1.124.2 SpaE - Bacillus subtilis.	246	3.30878e-14	26	227	251	98.2	94	6	6	5.4	ABC	Subtilin
ABJ61117.1	P29018	3.A.1.129.1	gnl|BL_ORD_ID|8370 gnl|TC-DB|P29018|3.A.1.129.1 Transport ATP-binding protein cydD - Escherichia coli.	592	2.52464e-74	27	605	588	96.2	94.9	5	6	4.75	ABC	Cysteine, Glutathione
ABJ61118.1	P23886	3.A.1.129.1	gnl|BL_ORD_ID|8199 gnl|TC-DB|P23886|3.A.1.129.1 Transport ATP-binding protein cydC - Escherichia coli.	577	3.50501e-63	28	581	573	96.4	98.8	5	6	3.95	ABC	Cysteine, Glutathione
ABJ60981.1	Q8Y5E9	3.A.1.134.12	gnl|BL_ORD_ID|15127 gnl|TC-DB|Q8Y5E9|3.A.1.134.12 Lmo2115 protein OS=Listeria monocytogenes serovar 1/2a (strain ATCC BAA-679 / EGD-e) GN=lmo2115 PE=4 SV=1	672	5.41489e-47	23	622	646	99.5	99.5	10	10	7.4	ABC	Beta-lactam antibiotics, Nisin, Gallidermin, Bacitracin
ABJ61024.1	Q9WYC4	3.A.1.135.5	gnl|BL_ORD_ID|17167 gnl|TC-DB|Q9WYC4|3.A.1.135.5 Uncharacterized ABC transporter ATP-binding protein TM_0288 OS=Thermotoga maritima (strain ATCC 43589 / MSB8 / DSM 3109 / JCM 10099) GN=TM_0288 PE=1 SV=1	602	1.03977e-147	40	616	598	97.6	95.3	5	5	4.55	ABC	Daunomycin, 2,7-bis(carboxyethyl)-5(6)-carboxyfluorescein-acetoxymethylester
ABJ59923.1	Q837P4	3.A.1.135.8	gnl|BL_ORD_ID|14002 gnl|TC-DB|Q837P4|3.A.1.135.8 ABC transporter, ATP-binding/permease protein OS=Enterococcus faecalis (strain ATCC 700802 / V583) GN=EF_0790 PE=4 SV=1	589	0	56	592	589	99.3	99.8	5	5	4.7	ABC	daunorubicin, doxorubicin, ethidium, Hoechst 33342, Fluoroquinolones
ABJ59922.1	Q837P5	3.A.1.135.8	gnl|BL_ORD_ID|14003 gnl|TC-DB|Q837P5|3.A.1.135.8 ABC transporter, ATP-binding/permease protein OS=Enterococcus faecalis (strain ATCC 700802 / V583) GN=EF_0789 PE=4 SV=1	574	0	51	577	571	98.8	99.6	6	6	6.2	ABC	daunorubicin, doxorubicin, ethidium, Hoechst 33342, Fluoroquinolones
ABJ60322.1	P77307	3.A.1.139.2	gnl|BL_ORD_ID|10106 gnl|TC-DB|P77307|3.A.1.139.2 UPF0014 inner membrane protein ybbM OS=Escherichia coli (strain K12) GN=ybbM PE=1 SV=2	251	2.43048e-91	58	253	259	98.8	96.5	7	7	6.65	ABC	Fe2+
ABJ59939.1	Q2FLJ9	3.A.3.1.8	gnl|BL_ORD_ID|11628 gnl|TC-DB|Q2FLJ9|3.A.3.1.8 ATPase, E1-E2 type OS=Methanospirillum hungatei (strain JF-1 / DSM 864) GN=Mhun_0636 PE=4 SV=1	918	0	49	933	931	97.9	97.3	8	10	5.3	P-ATPase	Na+, K+
ABJ60880.1	Q04JJ5	3.A.3.2.28	gnl|BL_ORD_ID|10689 gnl|TC-DB|Q04JJ5|3.A.3.2.28 Cation-transporting ATPase, E1-E2 family protein OS=Streptococcus pneumoniae serotype 2 (strain D39 / NCTC 7466) GN=SPD_1383 PE=3 SV=1	892	0	59	893	898	99.1	98.3	10	10	8.75	P-ATPase	Ca2+, Mn2+
ABJ60589.1	GAT39076	3.A.3.2.46	gnl|BL_ORD_ID|4461 gnl|TC-DB|GAT39076.1|3.A.3.2.46 ATPase [Listeria monocytogenes]	889	0	48	875	880	99	99	10	9	7.4	P-ATPase	None
ABJ60224.1	Q9X6G0	3.A.3.3.3	gnl|BL_ORD_ID|17225 gnl|TC-DB|Q9X6G0|3.A.3.3.3 Cadmium/manganese transport ATPase - Lactobacillus plantarum.	624	0	54	634	758	97.3	82.2	6	9	3.45	P-ATPase	Mn2+, Cd2+
ABJ60347.1	I4G6G7	3.A.3.4.5	gnl|BL_ORD_ID|4798 gnl|TC-DB|I4G6G7|3.A.3.4.5 Magnesium-transporting ATPase, P-type 1 OS=Microcystis aeruginosa PCC 9443 OX=1160281 GN=mgtA PE=4 SV=1	903	0	45	912	912	96.2	96.1	9	8	5.85	P-ATPase	None
ABJ61150.1	Q7A3E6	3.A.3.5.19	gnl|BL_ORD_ID|13636 gnl|TC-DB|Q7A3E6|3.A.3.5.19 Copper-transporting ATPase copA - Staphylococcus aureus (strain N315).	640	0	48	644	802	97.2	78.8	8	7	4.2	P-ATPase	Cu2+, Fe2+, Pb2+
ABJ60241.1	Q835V4	3.A.3.23.2	gnl|BL_ORD_ID|14001 gnl|TC-DB|Q835V4|3.A.3.23.2 Cation-transporting ATPase, E1-E2 family - Enterococcus faecalis (Streptococcus faecalis).	771	0	56	808	806	94.4	95.2	10	10	6.9	P-ATPase	cations
ABJ61101.1	Q830Z1	3.A.3.25.3	gnl|BL_ORD_ID|13998 gnl|TC-DB|Q830Z1|3.A.3.25.3 Cadmium-translocating P-type ATPase - Enterococcus faecalis (Streptococcus faecalis).	616	0	50	630	601	97	99.2	7	7	4.2	P-ATPase	cations
ABJ59821.1	P0ADZ7	3.A.5.1.1	gnl|BL_ORD_ID|7551 gnl|TC-DB|P0ADZ7|3.A.5.1.1 UPF0092 membrane protein YajC OS=Escherichia coli (strain K12) GN=yajC PE=1 SV=1	108	9.16802e-10	26	150	110	67.3	97.3	1	1	0.8	Sec	proteins
ABJ59716.1	P16336	3.A.5.2.1	gnl|BL_ORD_ID|7965 gnl|TC-DB|P16336|3.A.5.2.1 PREPROTEIN TRANSLOCASE SECY SUBUNIT - Bacillus subtilis.	435	1.95149e-135	49	431	431	99.8	99.5	10	10	8.7	Sec	proteins
ABJ60872.1	Q15HU6	3.A.7.14.2	gnl|BL_ORD_ID|11210 gnl|TC-DB|Q15HU6|3.A.7.14.2 TcpG - Clostridium perfringens.	150	2.81961e-29	41	208	334	70.7	43.7	1	1	0.75	IVSP	DNA
ABJ60312.1	Q15HU4	3.A.7.14.2	gnl|BL_ORD_ID|11208 gnl|TC-DB|Q15HU4|3.A.7.14.2 TcpI - Clostridium perfringens.	161	2.61995e-14	29	187	164	82.4	83.5	4	4	1.7	IVSP	DNA
ABJ60543.1	P39695	3.A.11.1.1	gnl|BL_ORD_ID|8978 gnl|TC-DB|P39695|3.A.11.1.1 COME OPERON PROTEIN 3 - Bacillus subtilis.	759	3.21497e-78	28	761	776	94.6	96.4	9	12	3.65	DNA-T	ssDNA
ABJ60544.1	Q8DQ41	3.A.11.1.2	gnl|BL_ORD_ID|14259 gnl|TC-DB|Q8DQ41|3.A.11.1.2 Competence protein - Streptococcus pneumoniae (strain ATCC BAA-255 / R6).	226	1.04081e-40	37	246	216	91.1	97.2	1	1	0.7	DNA-T	ssDNA
ABJ59819.1	AKM80389	3.A.11.1.5	gnl|BL_ORD_ID|1209 gnl|TC-DB|AKM80389.1|3.A.11.1.5 Holliday junction ATP-dependent DNA helicase RuvA [Candidatus Saccharibacteria bacterium GW2011_GWC2_44_17]	172	6.91914e-26	33	192	192	85.4	88.5	1	1	0	DNA-T	None
ABJ60706.1	P21458	3.A.12.1.1	gnl|BL_ORD_ID|8100 gnl|TC-DB|P21458|3.A.12.1.1 Stage III sporulation protein E - Bacillus subtilis.	818	0	45	808	787	99.6	99.5	4	4	3.3	S-DNA-T	DNA
ABJ60637.1	G2JS06	3.A.14.1.2	gnl|BL_ORD_ID|4198 gnl|TC-DB|G2JS06|3.A.14.1.2 Late competence protein ComGB OS=Listeria monocytogenes J0161 GN=LMOG_00363 PE=4 SV=1	326	6.66684e-15	21	339	343	91.2	94.8	6	5	1.8	FPE	proteins
ABJ61115.1	P0ABJ9	3.D.4.3.2	gnl|BL_ORD_ID|7506 gnl|TC-DB|P0ABJ9|3.D.4.3.2 Cytochrome d ubiquinol oxidase subunit 1 OS=Escherichia coli (strain K12) GN=cydA PE=1 SV=1	481	4.03106e-88	34	465	522	91	90.6	9	9	6.4	COX	H+
ABJ61116.1	P0ABK2	3.D.4.3.2	gnl|BL_ORD_ID|7507 gnl|TC-DB|P0ABK2|3.D.4.3.2 Cytochrome d ubiquinol oxidase subunit 2 OS=Escherichia coli (strain K12) GN=cydB PE=1 SV=1	361	1.26195e-59	33	340	379	95.9	94.5	8	9	5.25	COX	H+
ABJ60976.1	P20166	4.A.1.1.9	gnl|BL_ORD_ID|8073 gnl|TC-DB|P20166|4.A.1.1.9 PTS system, glucose-specific IICBA component (EIICBA-Glc) (Glucose- permease IICBA component) (Phosphotransferase enzyme II, CBA component) (EC 2.7.1.69) (EII-Glc/EIII-Glc) - Bacillus subtilis.	703	2.12387e-165	40	691	699	97.1	97.7	11	13	7.2	Glc	glucose
ABJ60961.1	ART98499	4.A.1.2.14	gnl|BL_ORD_ID|1337 gnl|TC-DB|ART98499|4.A.1.2.14 PTS beta-glucoside transporter subunit EIIBCA [Lactobacillus gasseri]	672	0	99	672	672	99.9	99.9	12	12	12.45	Glc	beta-glucosides
ABJ59932.1	ART98499	4.A.1.2.14	gnl|BL_ORD_ID|1337 gnl|TC-DB|ART98499|4.A.1.2.14 PTS beta-glucoside transporter subunit EIIBCA [Lactobacillus gasseri]	470	1.39083e-98	38	654	672	69.4	68.9	9	12	6.55	Glc	beta-glucosides
ABJ61043.1	ART98417	4.A.1.2.15	gnl|BL_ORD_ID|1336 gnl|TC-DB|ART98417|4.A.1.2.15 PTS beta-glucoside transporter subunit EIIBCA [Lactobacillus gasseri]	624	0	100	624	624	99.8	99.8	7	7	7.55	Glc	beta-glucosides
ABJ61065.1	ART98386	4.A.1.2.16	gnl|BL_ORD_ID|1335 gnl|TC-DB|ART98386|4.A.1.2.16 PTS beta-glucoside transporter subunit EIIBCA [Lactobacillus gasseri]	647	0	100	647	647	99.8	99.8	10	10	10.45	Glc	beta glucosides
ABJ59803.1	ART98386	4.A.1.2.16	gnl|BL_ORD_ID|1335 gnl|TC-DB|ART98386|4.A.1.2.16 PTS beta-glucoside transporter subunit EIIBCA [Lactobacillus gasseri]	657	3.53215e-145	40	654	647	96.9	99.5	11	10	7.75	Glc	beta glucosides
ABJ61014.1	Q1LZ59	4.A.2.1.7	gnl|BL_ORD_ID|11441 gnl|TC-DB|Q1LZ59|4.A.2.1.7 Inducible fructose permease - Streptococcus mutans UA159.	671	0	48	661	655	98.6	99.5	10	10	8.75	Fru	fructose, Xylitol
ABJ59561.1	Q8DWE7	4.A.2.1.8	gnl|BL_ORD_ID|14289 gnl|TC-DB|Q8DWE7|4.A.2.1.8 Putative PTS system, fructose-specific IIBC component - Streptococcus mutans.	458	0	59	643	466	70.9	97.6	9	8	7.75	Fru	fructose
ABJ59749.1	Q045X3	4.A.3.1.2	gnl|BL_ORD_ID|10670 gnl|TC-DB|Q045X3|4.A.3.1.2 PTS system lactose-specific IIB component, Lac family / PTS system lactose-specific IIC component, Lac family OS=Lactobacillus gasseri (strain ATCC 33323 / DSM 20243) GN=LGAS_0343 PE=4 SV=1	567	0	100	567	567	99.8	99.8	9	9	9.85	Lac	Lactose
ABJ59899.1	Q045H3	4.A.3.1.3	gnl|BL_ORD_ID|10668 gnl|TC-DB|Q045H3|4.A.3.1.3 PTS system lactose-specific IIB component, Lac family / PTS system lactose-specific IIC component, Lac family OS=Lactobacillus gasseri (strain ATCC 33323 / DSM 20243) GN=LGAS_0501 PE=4 SV=1	565	0	100	565	565	99.8	99.8	9	9	9.5	Lac	Lactose
ABJ61125.1	P46317	4.A.3.2.2	gnl|BL_ORD_ID|9292 gnl|TC-DB|P46317|4.A.3.2.2 PTS SYSTEM, CELLOBIOSE-SPECIFIC IIC COMPONENT (EIIC-CEL) (CELLOBIOSE- PERMEASE IIC COMPONENT) (PHOSPHOTRANSFERASE ENZYME II, C COMPONENT) - Bacillus subtilis.	428	4.882e-96	39	494	452	84	93.4	12	10	7.75	Lac	Lichenan oligosaccharides
ABJ59967.1	Q9CJ32	4.A.3.2.4	gnl|BL_ORD_ID|15861 gnl|TC-DB|Q9CJ32|4.A.3.2.4 Cellobiose-specific PTS system IIC component - Lactococcus lactis subsp. lactis (Streptococcus lactis).	494	4.40736e-103	36	443	494	97.3	99.4	8	9	4.2	Lac	Cellobiose
ABJ61086.1	Q9CJ32	4.A.3.2.4	gnl|BL_ORD_ID|15861 gnl|TC-DB|Q9CJ32|4.A.3.2.4 Cellobiose-specific PTS system IIC component - Lactococcus lactis subsp. lactis (Streptococcus lactis).	279	1.11703e-19	26	439	494	58.3	56.1	8	9	3.95	Lac	Cellobiose
ABJ60967.1	Q9KSH4	4.A.3.2.6	gnl|BL_ORD_ID|16337 gnl|TC-DB|Q9KSH4|4.A.3.2.6 PTS system, cellobiose-specific IIC component OS=Vibrio cholerae GN=VC_1282 PE=4 SV=1	434	2.00628e-80	32	440	446	98	94.8	10	10	6.25	Lac	Glucoseamine
ABJ59606.1	Q72XQ0	4.A.3.2.8	gnl|BL_ORD_ID|13512 gnl|TC-DB|Q72XQ0|4.A.3.2.8 PTS system, cellobiose-specific IIC component OS=Bacillus cereus (strain ATCC 10987) GN=celB PE=1 SV=1	458	3.72246e-77	33	476	433	95	98.4	10	10	4.35	Lac	N-, N'-diacetylchitobiose
ABJ59598.1	O05507	4.A.3.2.10	gnl|BL_ORD_ID|5782 gnl|TC-DB|O05507|4.A.3.2.10 PTS system oligo-beta-mannoside-specific EIIC component OS=Bacillus subtilis (strain 168) OX=224308 GN=gmuC PE=1 SV=1	458	8.6254e-69	31	450	442	97.1	95.7	10	10	5.2	Lac	None
ABJ61080.1	Q04GJ9	4.A.6.1.10	gnl|BL_ORD_ID|10686 gnl|TC-DB|Q04GJ9|4.A.6.1.10 PTS system IID component, Man family OS=Oenococcus oeni (strain BAA-331 / PSU-1) GN=OEOE_0466 PE=4 SV=1	305	2.75856e-172	75	309	304	98.4	99.3	4	4	2.9	Man	glucose, fructose
ABJ61081.1	Q04GK0	4.A.6.1.10	gnl|BL_ORD_ID|10687 gnl|TC-DB|Q04GK0|4.A.6.1.10 Mannose-specific PTS system component IIC OS=Oenococcus oeni (strain BAA-331 / PSU-1) GN=OEOE_0465 PE=4 SV=1	273	1.59062e-143	76	267	271	99.6	99.6	7	7	6.5	Man	glucose, fructose
ABJ59914.1	B3WB11	4.A.6.1.13	gnl|BL_ORD_ID|1701 gnl|TC-DB|B3WB11|4.A.6.1.13 PTS system, IID component OS=Lactobacillus casei (strain BL23) GN=levG PE=4 SV=1	279	5.97891e-81	43	283	286	98.2	96.9	6	6	5.2	Man	Fucosyl-alpha-1,3-N-acetylglucosamine
ABJ59913.1	B3WB10	4.A.6.1.13	gnl|BL_ORD_ID|1700 gnl|TC-DB|B3WB10|4.A.6.1.13 PTS system, IIC component OS=Lactobacillus casei (strain BL23) GN=levF PE=4 SV=1	237	3.00085e-61	40	265	268	89.1	87.7	7	6	5.55	Man	Fucosyl-alpha-1,3-N-acetylglucosamine
ABJ59531.1	B3W756	4.A.6.1.18	gnl|BL_ORD_ID|1696 gnl|TC-DB|B3W756|4.A.6.1.18 Phosphotransferase system sugar-specific EIID component OS=Lactobacillus casei (strain BL23) GN=PTS-EIID PE=4 SV=1	272	1.19117e-149	76	272	273	99.3	99.3	6	6	5.05	Man	Galacto-N-biose, Lacto-N-biose, N-acetyl galactosamine
ABJ59530.1	B3W755	4.A.6.1.18	gnl|BL_ORD_ID|1695 gnl|TC-DB|B3W755|4.A.6.1.18 Phosphotransferase system sugar-specific EIIC component OS=Lactobacillus casei (strain BL23) GN=PTS-EIIC PE=4 SV=1	305	4.19222e-138	65	305	305	99.7	99.3	7	7	6.3	Man	Galacto-N-biose, Lacto-N-biose, N-acetyl galactosamine
ABJ59582.1	Q55487	4.D.1.1.14	gnl|BL_ORD_ID|12444 gnl|TC-DB|Q55487|4.D.1.1.14 Uncharacterized glycosyltransferase sll0501 OS=Synechocystis sp. (strain PCC 6803 / Kazusa) GN=sll0501 PE=3 SV=1	308	8.5341e-77	38	310	318	98.4	94.7	2	2	2.05	VGP	None
ABJ60913.1	F2KRG7	4.D.2.1.3	gnl|BL_ORD_ID|3760 gnl|TC-DB|F2KRG7|4.D.2.1.3 Lysylphosphatidylglycerol synthetase/UPF0104 OS=Archaeoglobus veneficus (strain DSM 11195 / SNP6) GN=Arcve_0713 PE=4 SV=1	327	1.89608e-23	28	338	330	95	94.2	8	8	5.6	GT2	Lysyl phosphatidyl glycerol
ABJ60701.1	Q6ADZ6	4.F.1.1.7	gnl|BL_ORD_ID|13063 gnl|TC-DB|Q6ADZ6|4.F.1.1.7 CDP-diacylglycerol--glycerol-3-phosphate 3-phosphatidyltransferase OS=Leifsonia xyli subsp. xyli (strain CTCB07) GN=pgsA PE=3 SV=1	185	3.7325e-30	36	187	189	94.7	91.5	4	5	2.95	CEPT1	phosphate
ABJ61119.1	Q8Y438	5.B.14.1.1	gnl|BL_ORD_ID|15124 gnl|TC-DB|Q8Y438|5.B.14.1.1 Lmo2635 protein OS=Listeria monocytogenes serovar 1/2a (strain ATCC BAA-679 / EGD-e) OX=169963 GN=lmo2635 PE=4 SV=1	312	1.16756e-37	29	308	319	95.5	96.9	9	9	5.75	F-EET	None
ABJ60525.1	P72367	8.A.3.2.4	gnl|BL_ORD_ID|9948 gnl|TC-DB|P72367|8.A.3.2.4 Capsular polysaccharide type 8 biosynthesis protein cap8A OS=Staphylococcus aureus GN=cap8A PE=1 SV=1	263	4.00497e-31	30	286	222	90.6	99.1	3	2	1.25	MPA1-C or MPA1+C	NONE
ABJ60435.1	P0AA53	8.A.21.2.2	gnl|BL_ORD_ID|7442 gnl|TC-DB|P0AA53|8.A.21.2.2 Protein QmcA OS=Escherichia coli (strain K12) GN=qmcA PE=1 SV=1	284	8.56612e-36	29	291	305	93.1	92.8	1	1	1	Stomatin	NONE
ABJ59437.1	G5IP47	8.A.56.2.2	gnl|BL_ORD_ID|4325 gnl|TC-DB|G5IP47|8.A.56.2.2 Uncharacterized protein OS=Enterococcus saccharolyticus 30_1 OX=742813 GN=HMPREF9478_00091 PE=4 SV=1	177	1.3161e-26	36	172	177	98.3	99.4	4	4	3.6	Wls	None
ABJ60628.1	C5F3G8	9.A.32.2.2	gnl|BL_ORD_ID|2338 gnl|TC-DB|C5F3G8|9.A.32.2.2 Uncharacterized protein OS=Lactobacillus paracasei subsp. paracasei 8700:2 GN=LBPG_00775 PE=4 SV=1	130	1.23747e-24	36	136	131	94.1	98.5	3	3	2.45	9.A.32	Unknown
ABJ59487.1	Q8EXN4	9.B.1.1.5	gnl|BL_ORD_ID|14337 gnl|TC-DB|Q8EXN4|9.B.1.1.5 Protease HtpX homolog OS=Leptospira interrogans serogroup Icterohaemorrhagiae serovar Lai (strain 56601) GN=htpX PE=3 SV=1	301	1.01884e-27	31	296	295	96.3	97.6	4	4	2.85	CAAX Protease	Unknown
ABJ61112.1	C7T7I3	9.B.2.1.18	gnl|BL_ORD_ID|2468 gnl|TC-DB|C7T7I3|9.B.2.1.18 Putative protease OS=Lactobacillus rhamnosus (strain ATCC 53103 / GG) GN=LRHM_2521 PE=4 SV=1	220	5.28083e-22	28	215	215	97.7	97.7	6	6	4.95	CAAX Protease2	Unknown
ABJ59851.1	P0ABP6	9.B.27.2.3	gnl|BL_ORD_ID|7516 gnl|TC-DB|P0ABP6|9.B.27.2.3 Protein dedA OS=Escherichia coli (strain K12) GN=dedA PE=1 SV=1	206	7.03985e-62	45	216	219	94.9	93.2	6	6	5.55	DedA	Selenite
ABJ60258.1	D6GX19	9.B.27.2.5	gnl|BL_ORD_ID|3019 gnl|TC-DB|D6GX19|9.B.27.2.5 SNARE associated protein OS=Candidatus Parvarchaeum acidophilus ARMAN-5 GN=BJBARM5_1043 PE=4 SV=1	188	5.4682e-32	32	203	206	90.1	86.4	4	5	3.3	DedA	Unknown
ABJ61051.1	BAQ24849	9.B.28.2.7	gnl|BL_ORD_ID|2063 gnl|TC-DB|BAQ24849.1|9.B.28.2.7 uncharacterized protein SRT_15880 [Streptococcus troglodytae]	224	3.33598e-42	37	200	245	95	90.6	4	4	1.3	MusI	None
ABJ59441.1	BAQ24849	9.B.28.2.7	gnl|BL_ORD_ID|2063 gnl|TC-DB|BAQ24849.1|9.B.28.2.7 uncharacterized protein SRT_15880 [Streptococcus troglodytae]	227	3.81251e-42	39	247	245	90.7	89.8	4	4	3.45	MusI	None
ABJ60436.1	BAQ24849	9.B.28.2.7	gnl|BL_ORD_ID|2063 gnl|TC-DB|BAQ24849.1|9.B.28.2.7 uncharacterized protein SRT_15880 [Streptococcus troglodytae]	239	9.99521e-29	30	269	245	87.4	96.3	6	4	3.65	MusI	None
ABJ61056.1	WP_084131416	9.B.28.5.1	gnl|BL_ORD_ID|18788 gnl|TC-DB|WP_084131416.1|9.B.28.5.1 hypothetical protein [Enterococcus aquimarinus]	580	1.48146e-86	32	596	598	94	95.7	7	7	6.55	MusI	None
ABJ60374.1	Q45064	9.B.31.1.2	gnl|BL_ORD_ID|11995 gnl|TC-DB|Q45064|9.B.31.1.2 Glycerol-3-phosphate acyltransferase OS=Bacillus subtilis (strain 168) GN=plsY PE=1 SV=1	186	4.85171e-57	51	219	193	84.5	94.3	5	5	4.75	PlsY	Unknown
ABJ60514.1	Q93TI8	9.B.67.8.4	gnl|BL_ORD_ID|15388 gnl|TC-DB|Q93TI8|9.B.67.8.4 Capsular biosynthesis protein CpsH OS=Streptococcus agalactiae GN=cpsIVH PE=4 SV=1	341	2.29803e-08	23	386	365	83.4	84.4	9	9	5.95	OAP	NONE
ABJ60511.1	Q286Z2	9.B.97.1.2	gnl|BL_ORD_ID|11594 gnl|TC-DB|Q286Z2|9.B.97.1.2 O-acetyltransferase OS=Escherichia phage phiV10 GN=oac PE=4 SV=1	340	3.45011e-25	27	340	338	94.7	96.2	10	10	7.7	ATAT	Unknown
ABJ60262.1	B9DIS8	9.B.97.5.1	gnl|BL_ORD_ID|1982 gnl|TC-DB|B9DIS8|9.B.97.5.1 Putative membrane protein with acyltransferase 3 family domain OS=Staphylococcus carnosus (strain TM300) GN=Sca_0581 PE=4 SV=1	641	2.68943e-102	32	646	611	98.3	97.2	11	11	8.15	ATAT	Unknown
ABJ60746.1	F0Z2G1	9.B.104.1.3	gnl|BL_ORD_ID|3708 gnl|TC-DB|F0Z2G1|9.B.104.1.3 Putative small hydrophobic molecule transporter protein OS=Clostridium sp. D5 GN=HMPREF0240_03287 PE=4 SV=1	193	4.07627e-29	31	228	223	82.9	85.7	7	6	5.2	Rhomboid	Unknown
ABJ60391.1	B8I766	9.B.105.1.5	gnl|BL_ORD_ID|1948 gnl|TC-DB|B8I766|9.B.105.1.5 Lipoprotein signal peptidase OS=Clostridium cellulolyticum (strain ATCC 35319 / DSM 5812 / JCM 6584 / H10) GN=lspA PE=3 SV=1	152	8.37147e-19	32	154	163	95.5	90.2	4	3	2.75	PbrBC	Unknown
ABJ60093.1	D0DT64	9.B.126.2.5	gnl|BL_ORD_ID|2616 gnl|TC-DB|D0DT64|9.B.126.2.5 YihY family protein OS=Lactobacillus fermentum 28-3-CHN GN=HMPREF0513_00853 PE=4 SV=1	275	1.23799e-48	29	307	299	89.3	89.6	7	6	4.85	YhjD	Unknown
ABJ59523.1	H3P2R4	9.B.141.1.2	gnl|BL_ORD_ID|4574 gnl|TC-DB|H3P2R4|9.B.141.1.2 Hypothetical membrane protein, YibE/F family OS=Lactobacillus plantarum subsp. plantarum NC8 GN=nc8_0863 PE=4 SV=1	239	8.96723e-65	43	253	254	94.1	93.7	6	6	6.15	YibE/F	Unknown
ABJ59522.1	C7TAQ3	9.B.141.1.3	gnl|BL_ORD_ID|2473 gnl|TC-DB|C7TAQ3|9.B.141.1.3 Uncharacterized protein OS=Lactobacillus rhamnosus (strain ATCC 53103 / GG) GN=LRHM_0777 PE=4 SV=1	322	5.15862e-54	32	360	355	89.2	88.5	7	9	6	YibE/F	Unknown
ABJ60381.1	Q8PUP5	9.B.143.2.3	gnl|BL_ORD_ID|14779 gnl|TC-DB|Q8PUP5|9.B.143.2.3 Putative uncharacterized protein OS=Methanosarcina mazei (strain ATCC BAA-159 / DSM 3647 / Goe1 / Go1 / JCM 11833 / OCM 88) GN=MM_2287 PE=4 SV=1	222	1.66877e-25	31	232	277	92.7	78.7	6	6	4.6	DUF1275	Unknown
ABJ60198.1	O31754	9.B.149.2.1	gnl|BL_ORD_ID|6077 gnl|TC-DB|O31754|9.B.149.2.1 Regulator of sigma-W protease RasP OS=Bacillus subtilis (strain 168) GN=rasP PE=1 SV=1	419	8.11411e-96	40	418	422	98.8	98.6	6	4	3.5	M50-P	None
ABJ60583.1	Q01466	9.B.157.1.1	gnl|BL_ORD_ID|10510 gnl|TC-DB|Q01466|9.B.157.1.1 Cell shape-determining protein MreC OS=Bacillus subtilis (strain 168) GN=mreC PE=1 SV=3	286	1.93581e-44	33	283	290	97.5	96.2	1	1	0.85	MreBCD	Folic acid
ABJ61107.1	C0B844	9.B.211.1.2	gnl|BL_ORD_ID|2078 gnl|TC-DB|C0B844|9.B.211.1.2 Uncharacterized protein OS=Coprococcus comes ATCC 27758 GN=COPCOM_01318 PE=4 SV=1	299	1.82016e-88	44	307	317	96.4	94	10	9	7.85	10PP	Unknown
ABJ59692.1	KPJ73630	9.B.252.3.6	gnl|BL_ORD_ID|5283 gnl|TC-DB|KPJ73630.1|9.B.252.3.6 hypothetical protein AMJ48_00120 [Parcubacteria bacterium DG_74_1]	248	1.95108e-13	27	225	272	95.1	89.3	8	8	5.25	UPUB6	None
ABJ60197.1	WP_102961726	9.B.273.1.2	gnl|BL_ORD_ID|18931 gnl|TC-DB|WP_102961726.1|9.B.273.1.2 phosphatidate cytidylyltransferase [Burkholderia cenocepacia]	290	2.26888e-27	32	263	273	98.5	98.5	8	7	6.25	PCT	None
[truncated: 83 more rows]

## Sheet: Planatarum
Query ID	Hit ID	Hit TCID	Hit Description	Match Len	e-Val	% Identity	Query Length	Hit Length	Query Coverage	Hit Coverage	Query TMS#	Hit TMS#	TM-Overlap Score	Family Abrv.	Predicted Substrate
[truncated: 434 more rows]

## Sheet: Reuteri
Query ID	Hit ID	Hit TCID	Hit Description	Match Len	e-Val	% Identity	Query Length	Hit Length	Query Coverage	Hit Coverage	Query TMS#	Hit TMS#	TM-Overlap Score	Family Abrv.	Predicted Substrate
[truncated: 281 more rows]

[truncated: 1 more sheets: Rhamnosus]
